# Supplementary material
Source: PubMed Central journal article supplement (PMC2683788)
Supplement: NIHMS108278-supplement-Supplementary_Data.pdf [file NIHMS108278-supplement-Supplementary_Data.pdf]

# MSS11

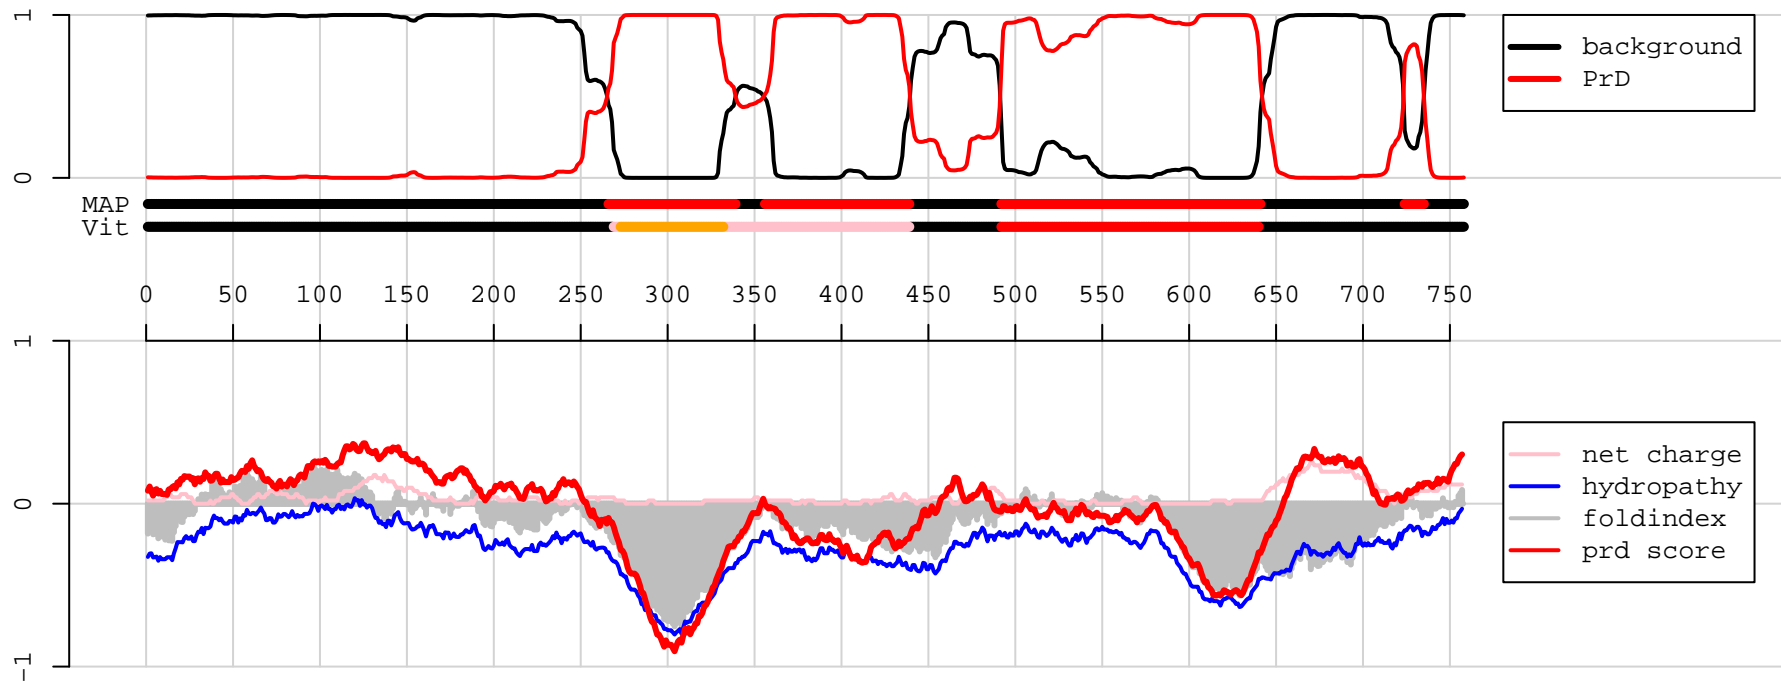

1 MDNTTININTNERSSNTDFSSAPNIKGLNSHTQLQFDADSRVVFVSDVMAKNSKQLLYAHIYNYLIKNNYWN SAAKFLSEADLPLSRINGSASGGKTSLNAS  
 101 LKQGLMDIASKGDIVSEDGLLPKMLMDANDTFLLEWWEIFQSLFNGDLESGYQODHNPLRERIIPILPANSKSNMP SHFSNLPPNVIPTQNSFPVSEE  
 201 SFRPNGDGSNFNLDPTNRNVSERFLSRTSGVYDKQNSANFAPDTAINSIDIAGOQYATINLHKHFNDL OSPAPPOSSOOOIOPPOHOPHOPOOOOOOO  
 301 OOOOOOOOOOOOOOOOOOOOOOOOOHOOOOOTPYPLVNPOMVPHLPSENHSTGLMP SVPPTNOOFNAOTOSSMFSDOORFFOYOLHHONOGOAPSF OOSOS  
 401 GRFDDMNAKMFFOOOALOONSL OONLGNONYOSNTRNN TAEETTPNDNNANGNSLLOEHIRARFNKMKTIPOQMKNOSTVANPVVSDITSOOOYMHMM  
 501 MORMAANQOLONSAFPD TNRIAPANNTMPLQPGNMGSPVIENPGMROTNP SGONPMINMOPLYQNVSSAMHAFAPOOQFHLPOHYKTNTSVPONDSTSV  
 601 FPLPNNNNNNNNNNNNNNNNNNNNNN SNNNSNNNNNNNNNNNNNNNN SNNTPTVSQPSKCTSSSSTTPNITTTIQPKRKQRVGKTKTKESRKVAAAQKVMKSKKLEQNG  
 701 DSAATNFINVTPKDSGGKGTVKVQNSNSOQQNLNGSFSMDTETFDIFNIGDFSPDLMS



# YBR016W

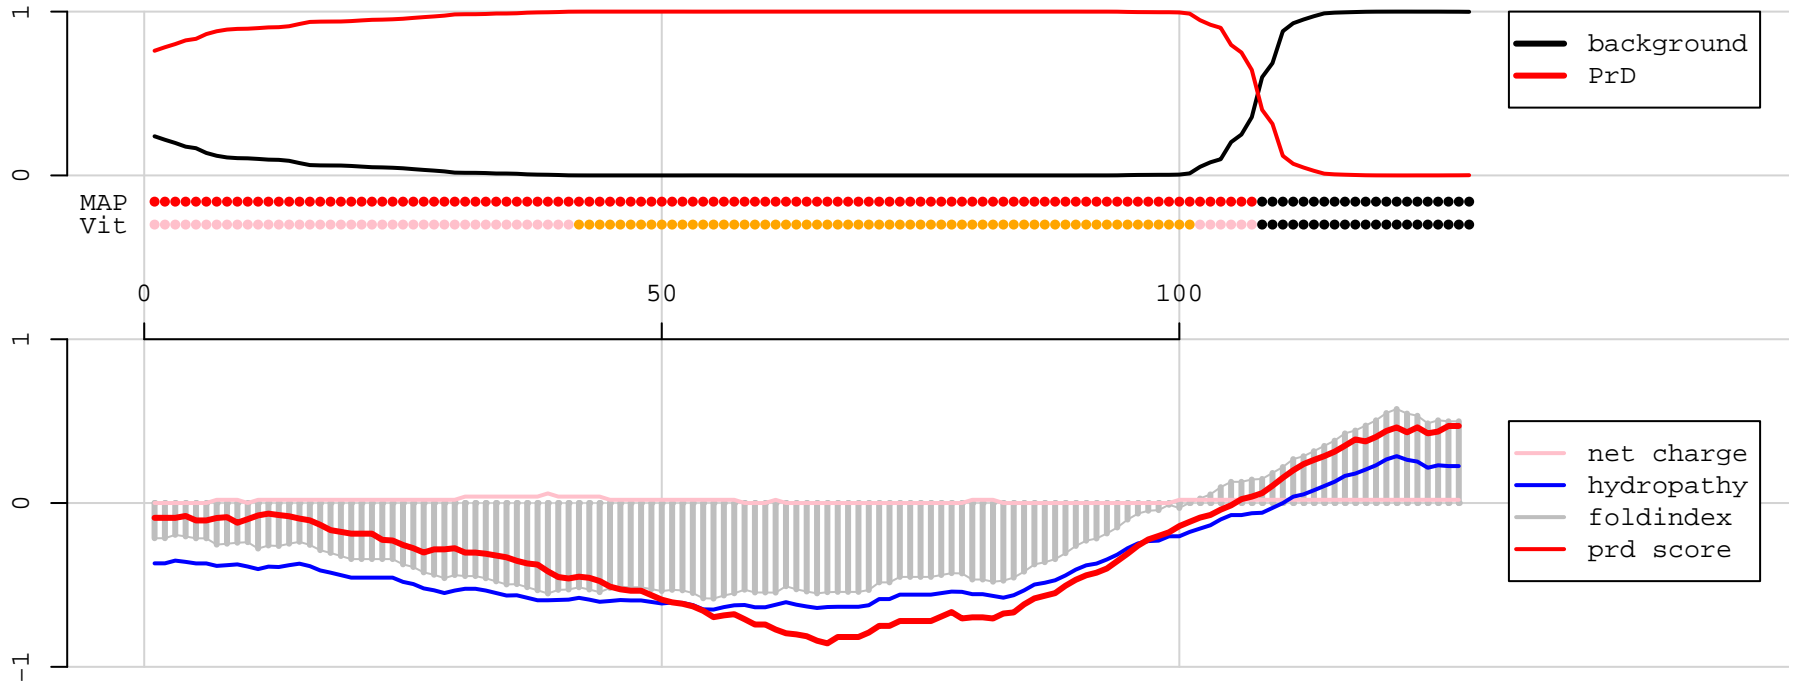

1 MSANDYYGGTAGEKSOYSRPSNPPSSAHONKTOERGYPPOOOOYYOQOOOHPGYNOOGYNOOGYNOOGYNOOGYNOOGYNOOGHOO  
 101 PPORGNEGCLAACLAALCICCTMDMLF

## ENT2

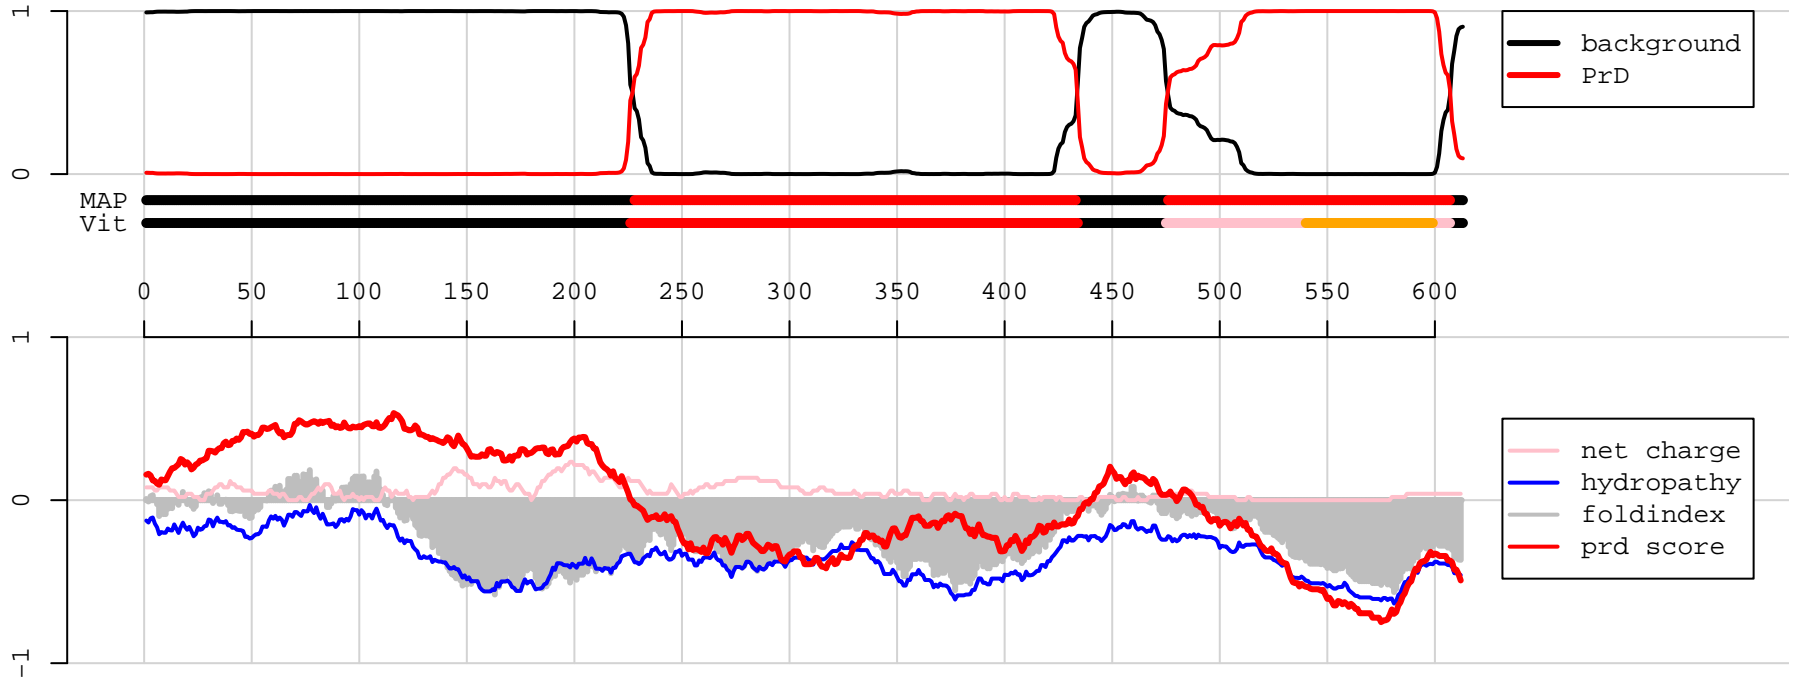

```

1  MSKQFVRS AKNMK GYSSTQVLVRDATANDSRTPSIDTLDDLAQRSYDSVDFFEIMDMLDKRLNDKGYWRHVAKSLTVLDYLVRFGENCVLWCRENFY
101 VIKTLREFR HENESGFDEGOIIRVKAKELVSLLNDEERLREERSMNTRNRRANRAARPRRRQRTRS NPHDSSPSYQDDLEKALEESRITAQEDEQRRE
201 LAQYDDED PFDQAALQLSKEEEEELK LOELORLOKQQQSL SQFOAPLQQQQPQQQPAYYDIFGNPISODEYLOYOYQODQEQAMAQORWLDQQQEQQLA
301 EQOYFQQQQQAAAAASALQQQO TANMQQQQQPADFOOPLPTGSNNPFSMDNLEROKEOOHAOLOROQEEARQQQEOLKLOOLORQQQEEAOLHOKRO
401 EEAOLQQQQAOLLQQQAQFOQQOPLKOTRTGNOSISDKYSDLNLTLLATGTGIDTFGNTGEARIPAQHTKTGTFINSOGTGYKQVTNEPKNNPFLSNOYTG
501 L PSTNIVPTOTGYGFGNPOSPPTNSPOONPTGISYSOP QQQQPQQQPOYMONFQQQQPOYAONFQQQPOYTNYQQQPOYIOPHQQQQQQQQQQQQQQ
601 GYTPDOGVSLIDL

```



# SUP35

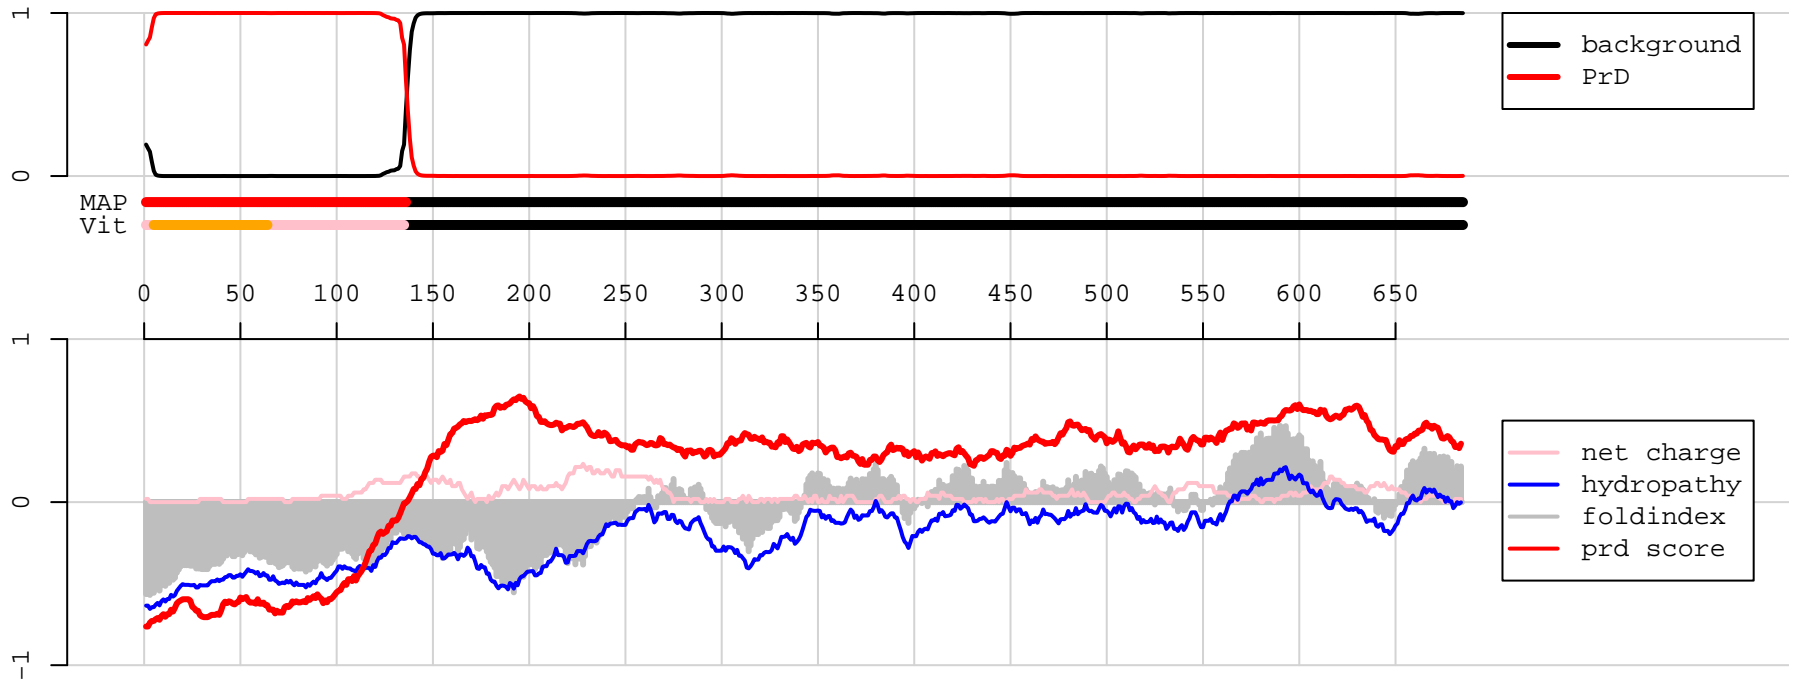

1 MSDSNOGNNOONYOOYSONGNOOOGNNRYOGYOAYNAOAOAPAGGGYONYOGYSGYOOGGYOOYNPDAGYOOOYNPOGGYOOYNPOGGYOOOFNPOGGRGN  
 101 YKNFNYNNNLLOGYOAGFOPOSOGMSLNDFOKOKOAAPKPKKTLKLVSSSGIKLANATKKVGTKPAESDKKEEEKSAETKEPTKEPTKVVEEPVKKEEKPV  
 201 QTEEKTEEKSELPKVEDLKIESTHTNTNNANVTSADALIKEQEEVEVDDEVVNDMFGGKDHVSLIFMGHVDAGKSTMGGNLLYLTGSVDKRTIEKYEREA  
 301 DAGRQGWYLSWVMDTNKEERNDGKTIEVGKAYFETEKRRYTILDAPGHKMYVSEMIGGASQADVGLVLSARKGEYETGFERGGQTRHALLAKTQGVNK  
 401 MVVVVKMDDPTVNWSKERYDQCVSNVSNFLRAIGYNIKTDVVFMVPSGYSGANLKDHVDPKECPWYTGPTLLEYLDTMNHVDRHINAPFMLPIAAKMKD  
 501 LGTIVEGKIESGHIKKGQSTLLMPNKTAVEIQNIYNETENEVDMAMCGEQVKLRIGVVEEDI SPGFVLTSPKNPIKSVTKFVAQIAIVELKSI IAAGFS  
 601 CVMHVHTAIEEVHIVKLLHKLEKGTNRKSKKPPAFAKKGMKVI AVLETEAPVCVETYQDYPQLGRFTLRDQGTIIAIGKIVKIAE

# MCM1

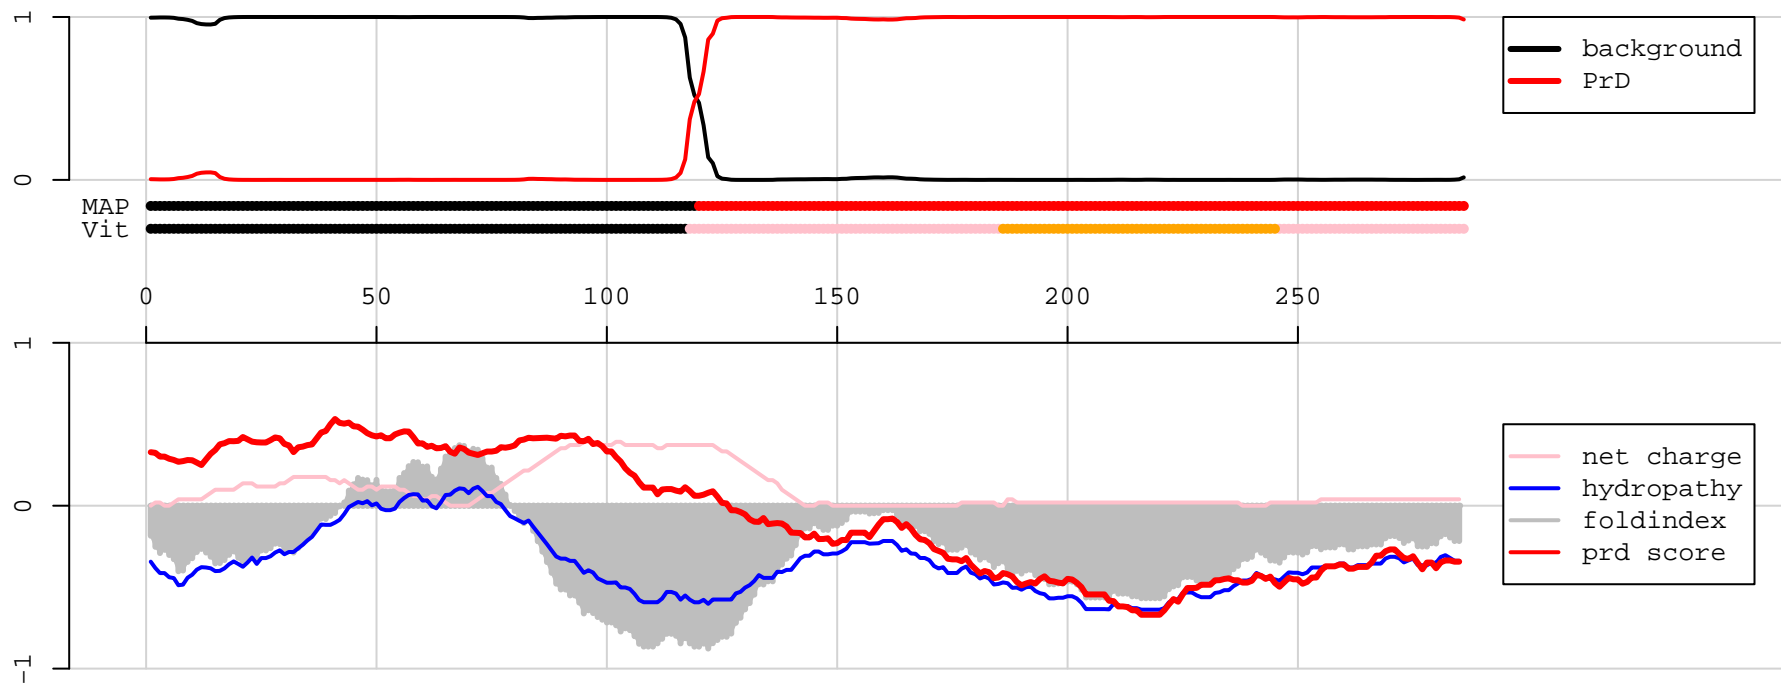

1 MSDIEEGTPTNNGQOKERRKIEIKFIENKTRRHVTFSKRKHGIMKKAFELSVLTGTQVLLLVVSETGLVYTFSTPKFEPIVTQOEGRNLIQACLNAPDDE  
 101 EEDEEEDGDDDDDDDDGNDMQRQPPQQQQPQQQQOVLNAHANSLGHLNODOVPAGALKOEVKSQLGGANPNONSMIOOOHHTONSOPQQQQQQPQQ  
 201 QMSQQQMSOHPRPOOGIPHPOOSOPQQQQQQQQQQLOQQQQQQQQQPLTGIHOPHOAFANAASPYLNAEONAAAYOYFOEPOGOY



## NAB2

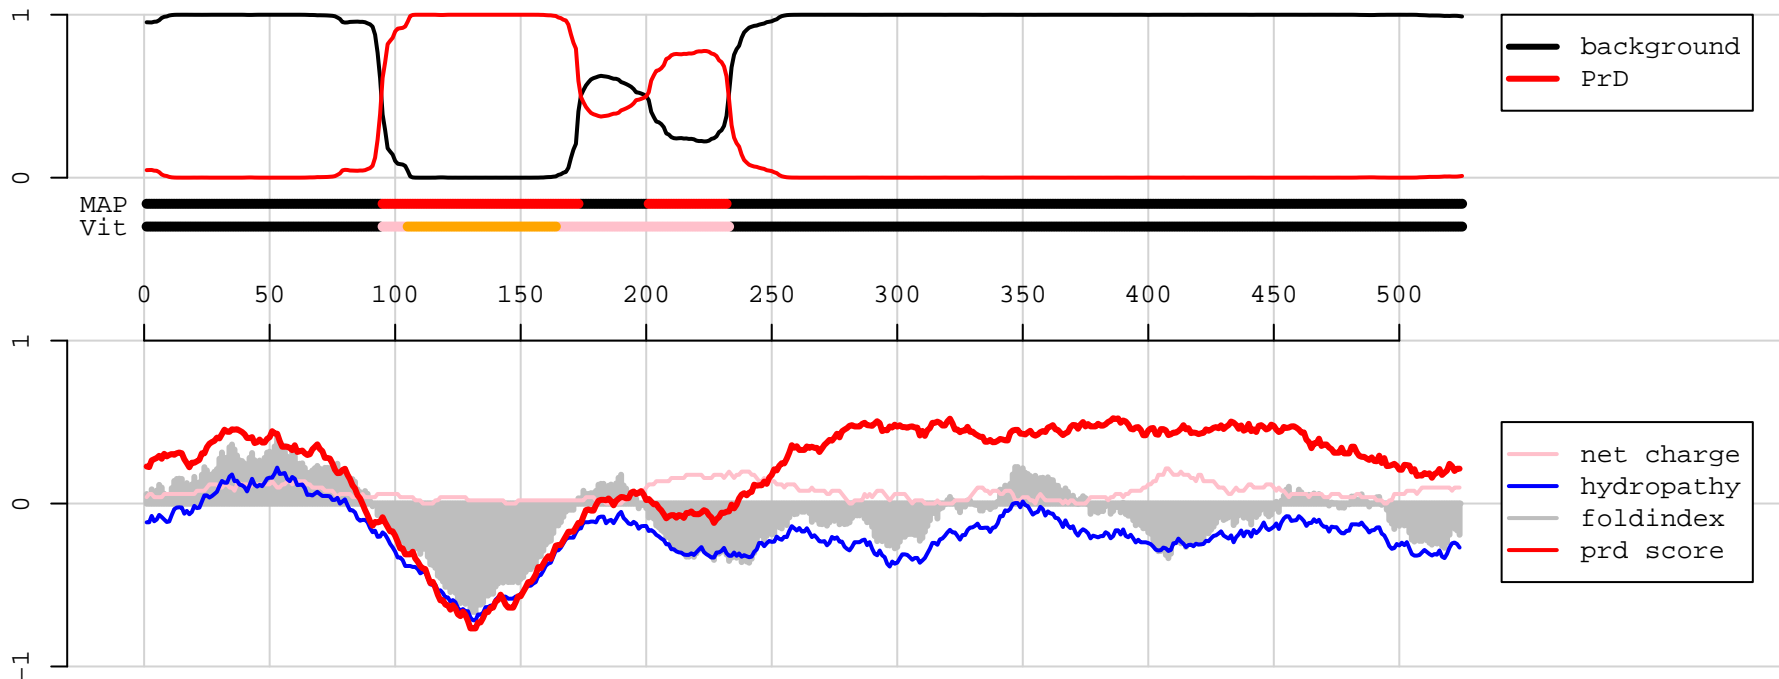

```

1  MSSEQYTENLKVIVAEKLAGIPNFNEDIKYVAEYIVLLIVNGGTVESVDELASLFDSVSRDTLANVVQTAFFALEALQQGESAENIVSKIRMMNAOSLG
101  QSDIAOAAAAAAAAAAAAOPDIAOOPPOOPPOOPPOOPPOOPPOOPPOOPPOOPLOLOPLOPOLGTONAMOTDAPATPSPISAFSGVVNAAAPPQFAPV
201  DNSORFTORGGGAVGKNRRGGRGGNRGGRNNNSTRFNPLAKALGMAGESNMNFTPTKKEGRCLFPHCPLGRSCPHAHPTKVCNEYPNCPKPPGTCEFLH
301  PNEDEELMKEMERTREEFQKRKADLLAAKRKPVQTGIVLCKFGALCSNPSCPFHGHTPANEDAKVIDLMWCDKNLTCDNPECRKAHSSLSKIKEVKPISQ
401  KKAAPPVVEKSLEQCKFGTHCTNKRCYR HARSHIMCREGANCTRIDCLFGHPINEDCRFGVNCKNIYCLFRHPPGRVLPKKGGAAPNSNVPTNERPFAL
501  PENAI IENAPPQTSFTHQEQDTEMN
  
```

# DEF1

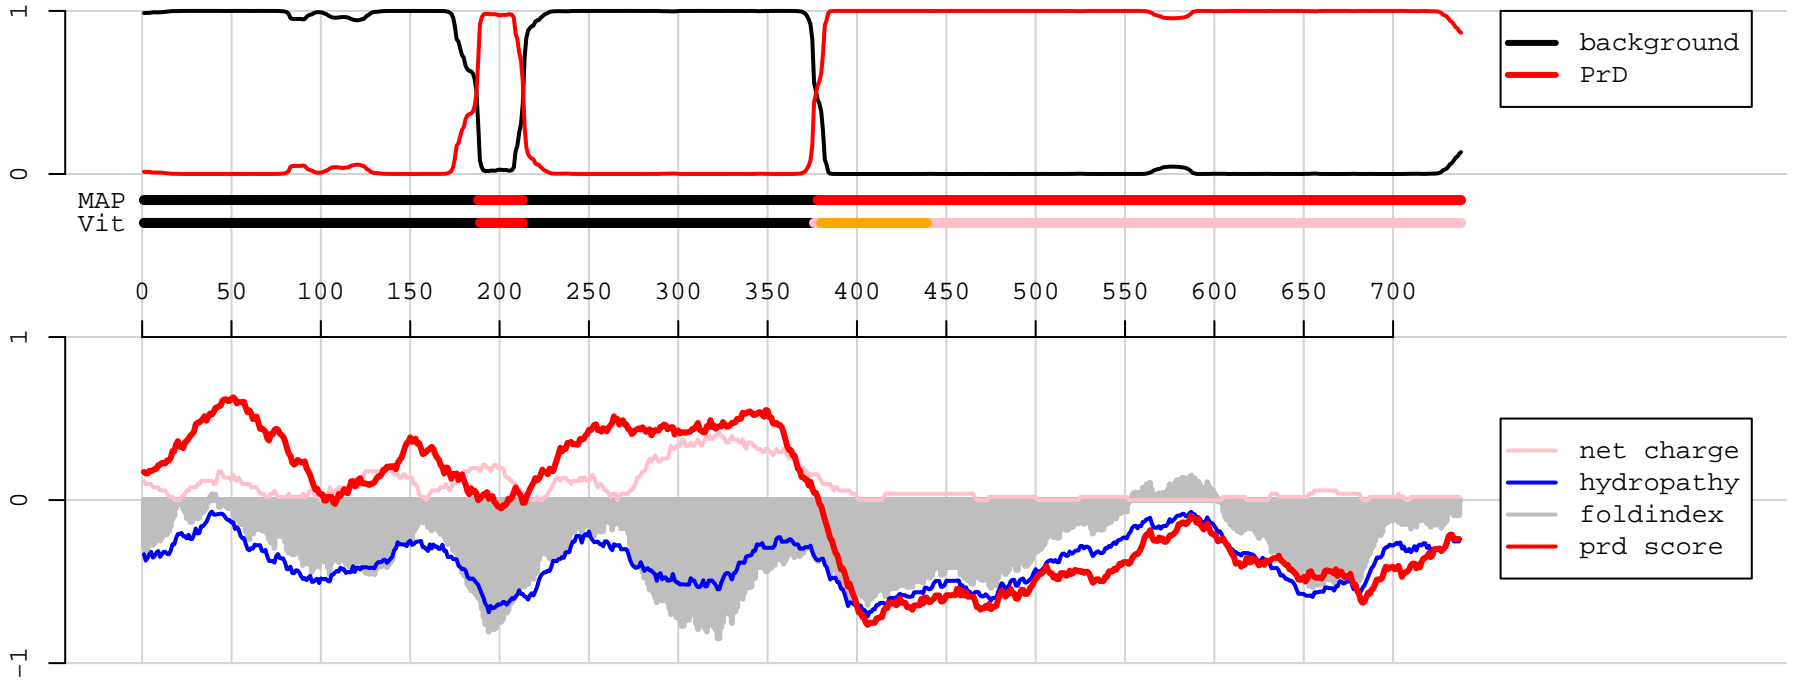

1 MSTQFRKSNHNSHSSKKNLPALKSKIDTLTELFPDWTSDDLLIDIVQEYDDLETIIDKITSGAVTRWDEVKKPAKKEYEKKEQOHSYVPOQHLNPNPEDI  
 101 TYKSSNNSNSFTSTKHNSNNTYQARNKKKVQTPRAHTTGKHVNLDKGKHVPSKPVSNNTTSWAAAVSVDTKHDVPQDSNDNNNEELEAOGQQAQEKNOEK  
 201 EQEEQOOQEGHNNKKEEHKQIEQPSLSSKKTTSRTSASQPKMSWAAIATPKPKAVKKTESPLENVAELKKEISDIKKDDQKSEASEEKVNEQETS AQEQE  
 301 EETAEPSEENEDRVPEVDGEEVQEEAEKKEQVKEEEEQTAELEQEQDNVAPEEEVTVVEEKVEISAVISEPPEDQANTVPOPQOOSQOPOPOPOPOPO  
 401 QPOPOQOQOQOPOPOPOQOOLQOQOQOQOQOQPVQAQAQAQEEELSONYYTQOQOQOYAQOOHQLQOQYLQOQOYAQOQOQHPOPOSOPOSOPOSOQO  
 501 GNNVAAOQYYMYONQFPGYSYPGMFDSOGYAYGOOYOOLAONNAOTSGNANOYNFOOGYGOAGANTAAANLTSAAAAAAAA SPATAHAOPQOQOQPYGGSFM  
 601 PYYAHFYQOQSFQYGOPOYGVAGQYQYOLPKNNYNYOTONGOEQOQSPNOGVAQHSQSDSOQKOSQOQOQOQOPOGOPOPEVOMONGOPVNPQOQOQOFOOYYQ  
 701 FOOQOQOQAAAAAAAAAQGVQYQYNGYDYNQSKNSRGFY

# YIL130W

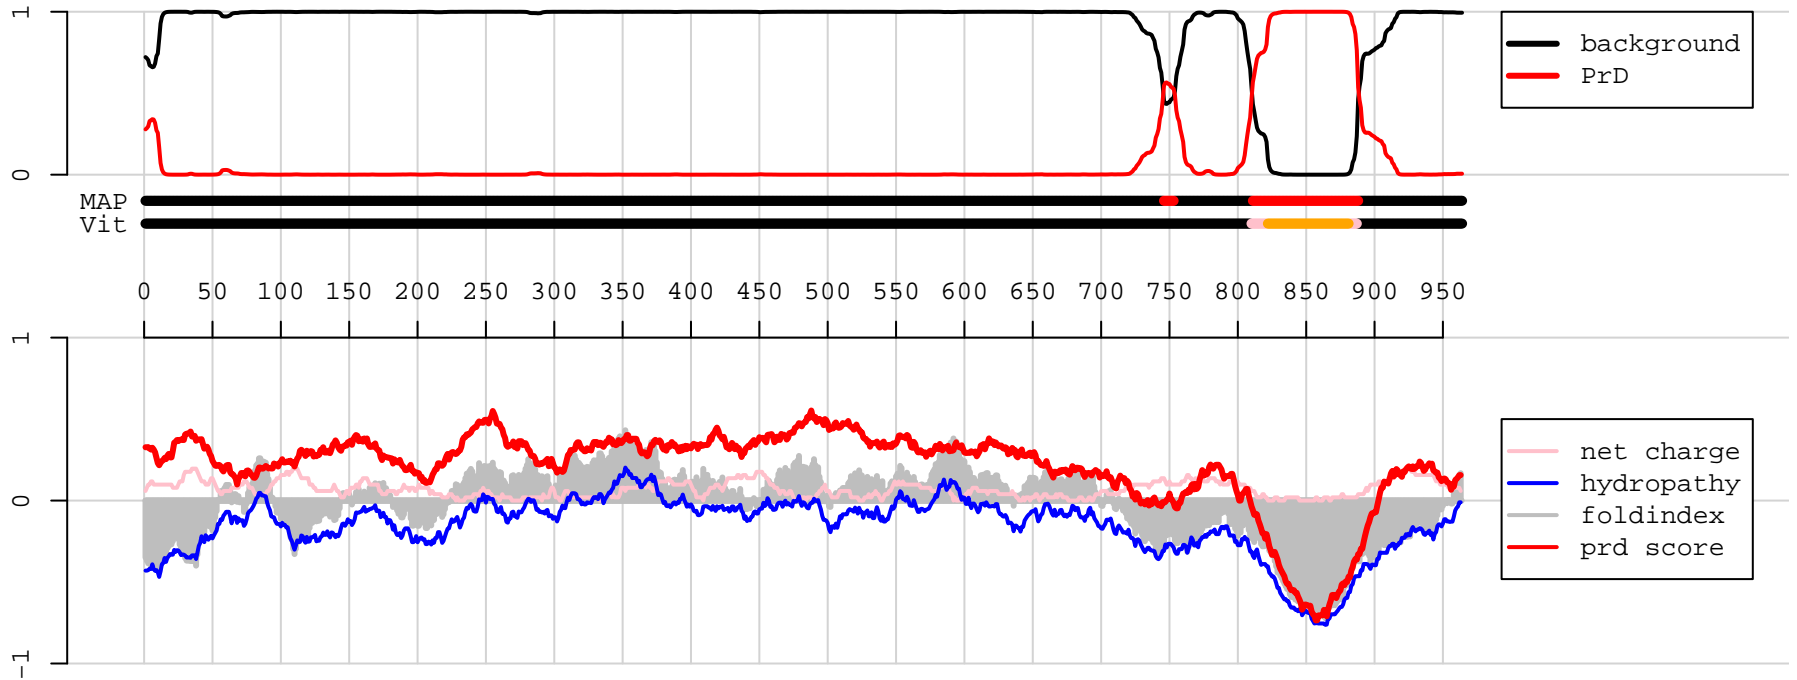

1 MPEQAQOGEQSVKRRRVTRACDECRKKKVKCDGQOPCIHCTVYSYECTYKKPTKRTQNSGNSGVLT LGNVTTGPSSSTVAAAASNPKNLLSNIKTERAI  
 101 LPGASTIPASNNPSKPRKYKTKSTRLOSKIDRYKQIFDEVFPQLPDIDNLDIPVFLQIFHNFKRDSQSFLDDTVKEYTLIVNDSSSPIQPVLSSNSKNST  
 201 PDEFLPNMKSDSNSASSNREQSDVTYSNIPVGREIKIILPPKAIALQFVKSTWEHCCVLLRFYHRPSFIRQLDELYETDPNNYTSKQMQLPLCYAAIA  
 301 VGALFSKSI VSNDSREKFLQDEGYKYFIAARKLIDITNARDLNSIQAILMLIIFLQCSARLSTCYTYIGVAMRSALRAGFHRKLSPNSGFSPIEIEMRK  
 401 RLFYTIYKLDVYINAMGLPRSISPDDFDQTLPLDLSDENITEVAYLPENQHSVLSSTGISNEHTKLFILNEIISELYPIKKTSNII SHETVTSLELKL  
 501 RNWLDLSPKELIPNAENIDPEYERANRLLHLSFLHVQIILYRPFHYLSRNMNAENVDP L CYRRARNSIAVARTVIKLAKEMVSNLLTGSYWYACYTIF  
 601 YSVAGLLFYIHEAQLPKDQSAREYYDILKDAETGRSVLIQLKDSSMAASRTYNLLNQIFEKLN SKTIQLTALHSSPSNESAF LVTNNSALKPHLGDSLQ  
 701 PPVFFSSQDTKNSFSLAKSEESTNDYAMANYLNNTPISENPLNEAQQODQVSOGTTNMSNERDPNNFLSIDIRLDNNGQSNILDATDDVFIRNDGDIPTN  
 801 SAFDFSSSKSNA SNN SNPDTI NNNYNNVSGKNNNNNNNI TNN SNNHNNNNNDNNNNNNNNNNNNNNNNNNNNNN SGNSSNNNNNNNNNNKNNNDFGIKIDNNSPSY  
 901 EGFPQLQIPLSQDNLNIEDKEEMSPNIEIKNEQNMTDSNDILGVFDQLDAQLFGKYLPLNYPSE

# RNQ1

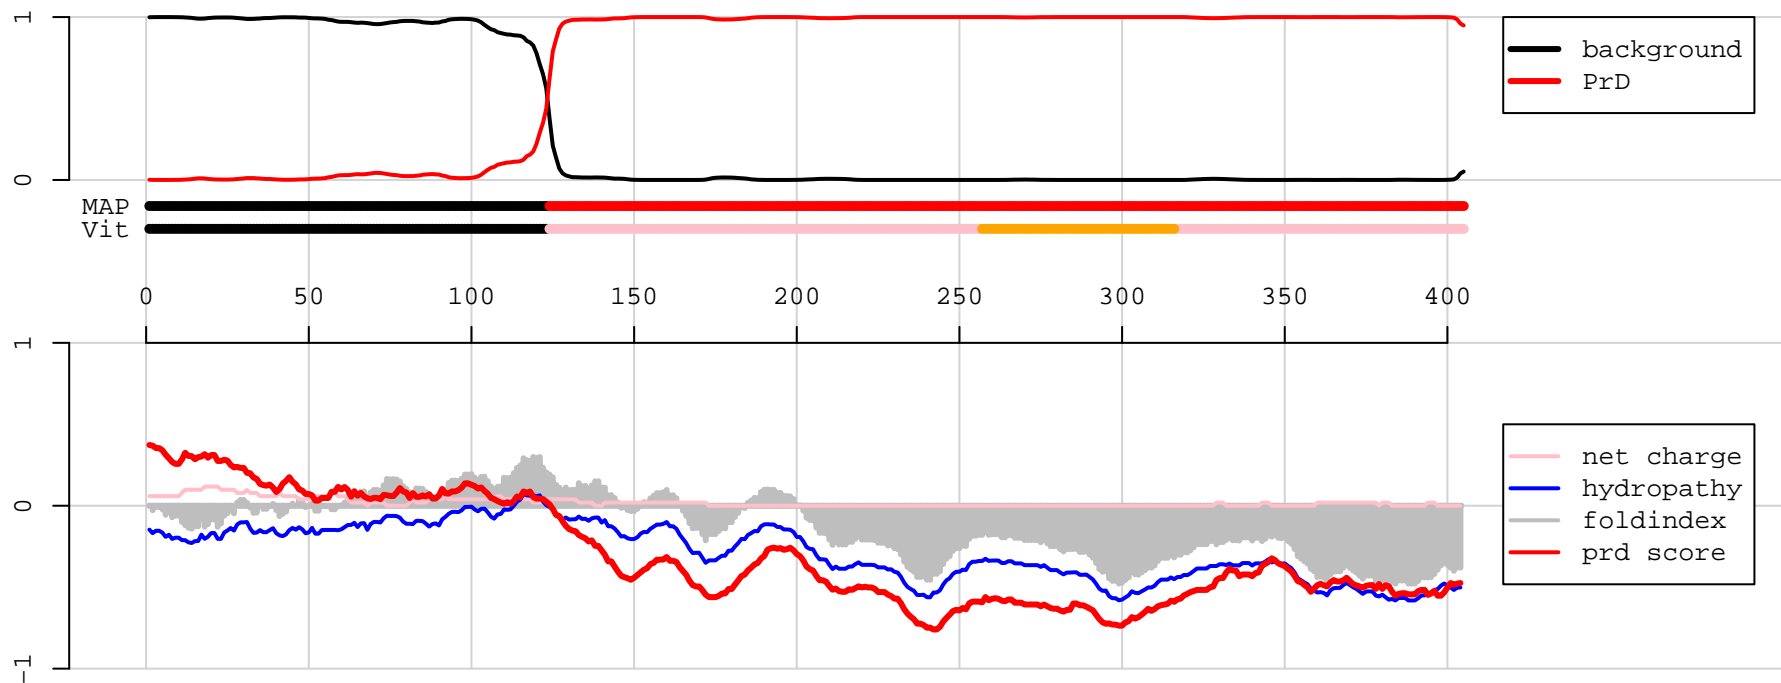

1 MDTDKLISEAESHFSGGNHAEAVAKLTSAAQSNPNDEQMSTIESLIQKIAGYVMDNRRSGGSDASQDRAAGGGSSFMNTLMADSKGSSQTQLGKLALLATV  
 101 MTHSSNKGSSNRGFVGTVM SMLSGSGGGSOSMGASGLAALASOFFKSGNNSOGOGOGOGOGOGOGOGOGOGOGSFTALASLASSFMNSNNNNNOOGONOSSG  
 201 GSSFGALASMASSFMHSNNNNNSNNSOOGYNOSYONGNONSOGYNNNOYOGGNGGYOQOOGOSGGAFSSLASMAOSYLGGGGOTOSN00OYNOOGONNOO  
 301 YQOOGONYOHOOOGOOOOGHSSSFALASMASSYLGNNNSNSNSSYGGOOOANEYGRPOONGOOOSNEYGRPOYGGNONSNGOHE'SFNFSGNF'SOONNG  
 401 NONRY







# PAN1

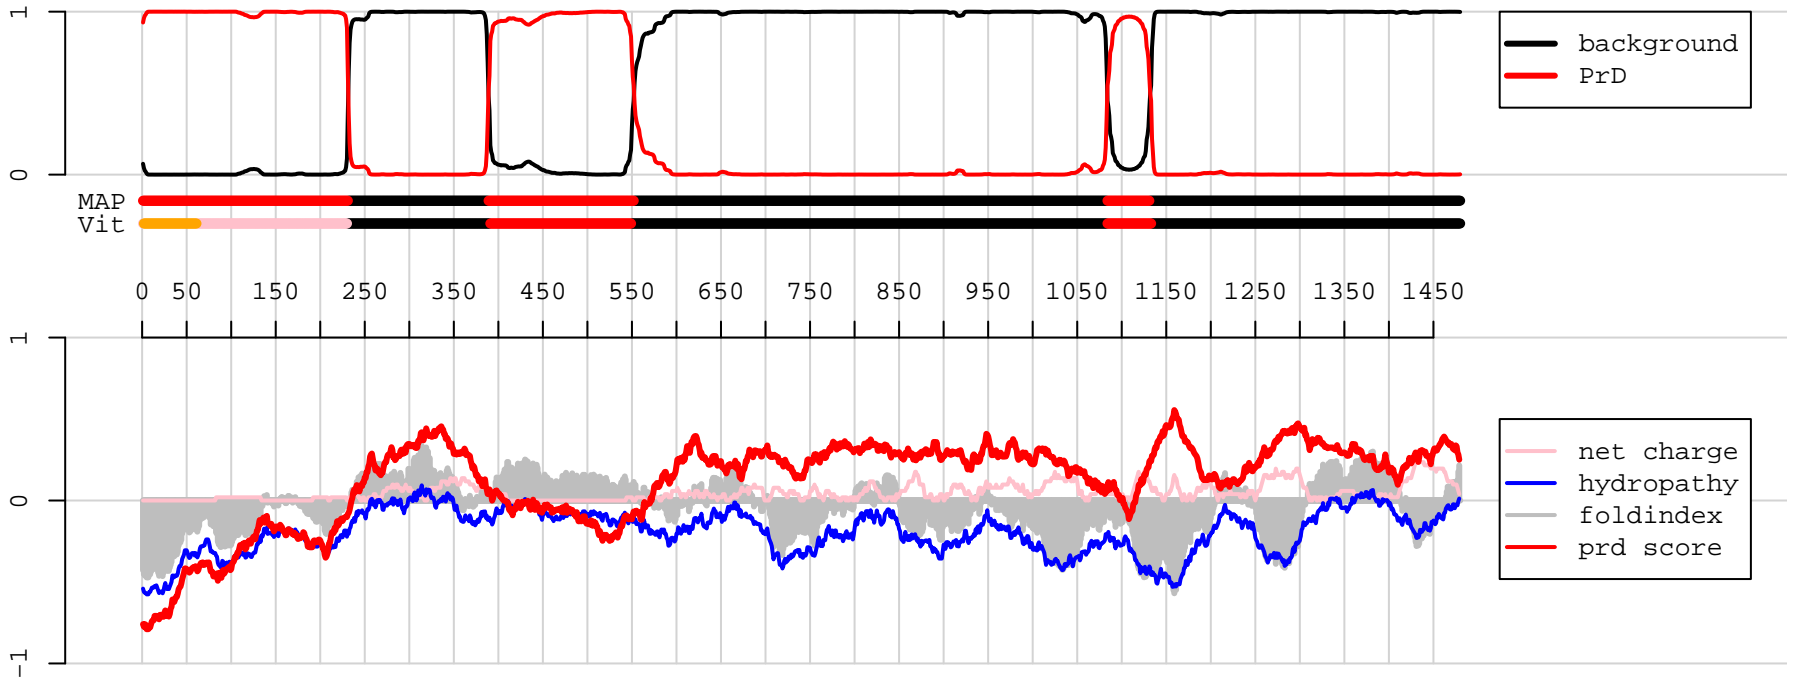

1 MYNPYOOOGMGYOOOOOOOOOPNGFYPOOOOOGSSNOPOGPOPOPOOAMAFNOPOATGIGGMPOSFGNSFSMSMPOOPOTGYNNNGNNGSVYGNNGNFGOOP  
 101 OOOOOAKPOHTGYVPNS SMPMMNTTGTMPPPNPAOPOLOSIOPOGTGYOAAANTANVHSVOPLOSOGTGYVSTPNLISSNOTOOPLOAGTGYYSO  
 201 POOVPPPAAOSLOPLKPOOTGFYLOPONOAPLEPLKPTATGFVNSFANGLNNDIKIPAIRLSFITAQDQAKFETLFRSIVTNGSNTVSGANCRKILMR  
 301 SGLPPSQLARIWTLCDTSKAGELLFPEFALAMHLINDVLQDGTIPYELDSKTKNEVSSFIDAINLSIANQDSSANDAPKTPFDEFITAGVQNLQPQPTGY  
 401 MPQTSFGIPLQSOITGGGVASALNPOSTGFMAPTTFNMSMNTGTPGLNPOITGGAPASMPONITGNALOPOTTGMPOTTGMPOTTGMPOTSFGVNLG  
 501 POLTGGALOSOYTTGGYGSVMPOOSGPASMPNLSFNNOGLOSOLTGLOPOPTGFLPPSNFSATMPLTAOKTGFGNNEIYTKSNFNNNLIDNSSQDKISTEE  
 601 KSLFYKIFETFDTONKGLLDSPATAVEIFRKSGLNRADLEQIWNLCDINNTGQLNKQEFALGMHLVYGKLNKGPINVLPSLIIPSSTKLLDNLKNQLKTE  
 701 PTTTKEKPSFGKIDALSYKNDDVLPNYRNRKRVYSAKNEEQSSFSSPSAKSVNHSSSTLOTDDISVDKTVEKKTAKPKYAGFSREINLKNIASLENEI  
 801 KNISNPENCYDSSIPSDLTSRFDAAIAKLPNLFNEISTIDNEITNAKIQLYRKKNPSSIIGSGPNGEITENDRKKAKSRALLRARMSALTGKSTESEDSL  
 901 SMEDEQQAIEIKRIQQENGKNQEI IKDIRSSISDISASLKSTMTGSNMISNQEFERWEFGIGLEDGVREFLDLKSNSNKS SVTESPPFVPSSTPTPVDDR  
 1001 SSSPSYSQFKTAEERAAYLKEQAKKRMKEKLAKFDKNRRNVTQSSRSISSENSREQPOQIAGSSNLVEPRATPFQEEKYVEVAQPTQPVQSTQPVQPTQP  
 1101 VQPTQPVQPTQPVQPTQPVQPTQPVQNVYNAKQESDDEDEDEDEEKRLQEELEKRLKLRKADKEKRLAALRQIEDAQNESDEEETNGKDNFGGHVNVPOA  
 1201 APVAPSAAFSQNSTNAPRSVHAAVTPAAGKNSTGLPSTTMGHNPYFKDASASSTSTFDARAAEMQRRIQRGLDEDEDDGWSDEDESNNRVAVDNKVEEAK  
 1301 IGHPDHARAPPVTAAPLPSVTPVPPAVPVPQANTSNEKSSPIPIAIPPSVTQEPVPLAPPLPAVDGFGQEPPIPSAPAIATAVQKSGSSTPALAGGVLP  
 1401 -----  
 1451 -----







# NUP116

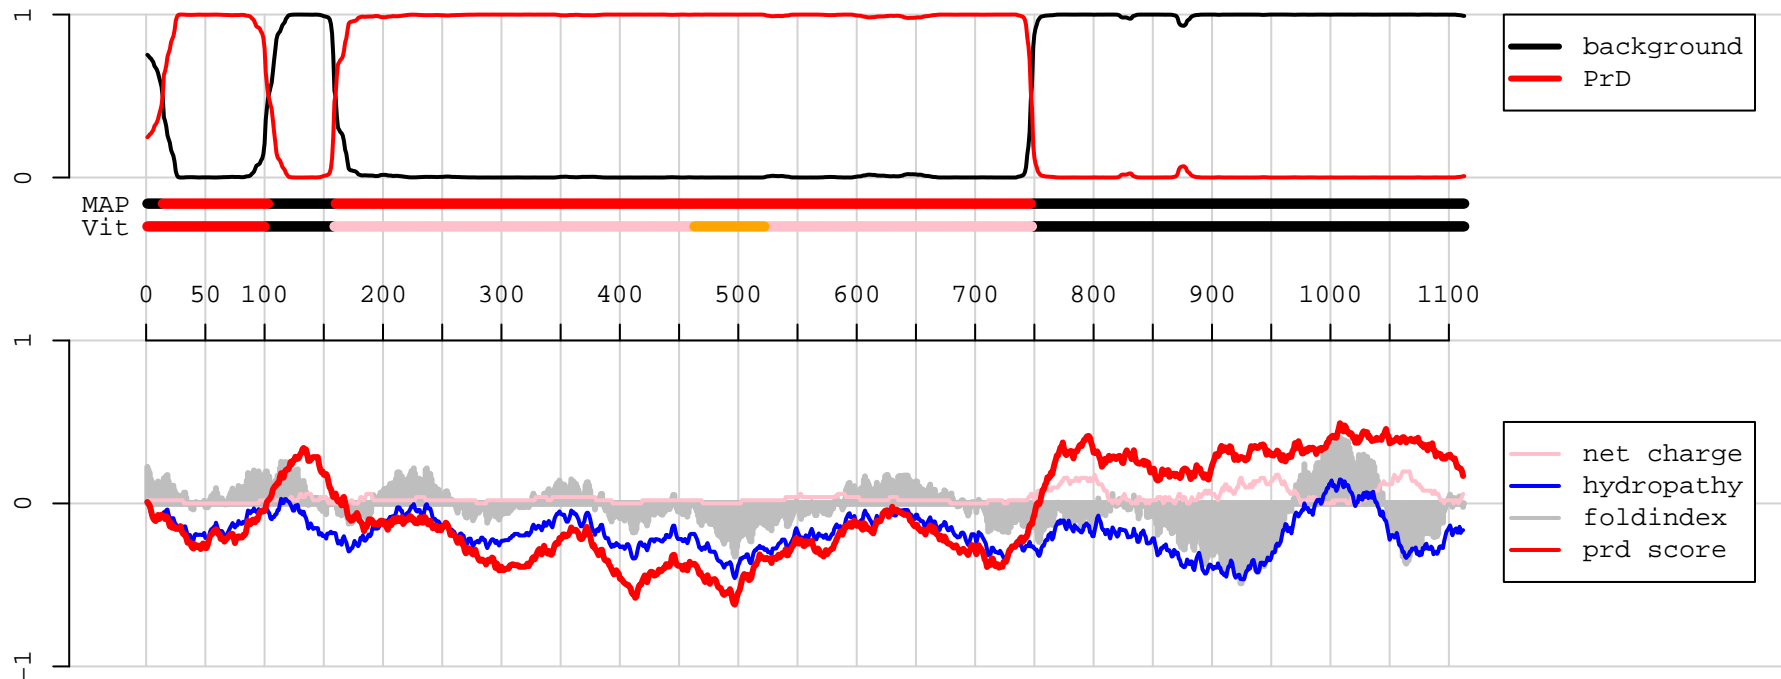

1 MFGVSRGAFPSATTOPFGSTGSTFGGQQQQQPVANTSAFGLSQOTNTTQAPAFGNFGNQTSSNSPFGMSGSTTANGTTPFGQSOLTNNNASGSIFGGMGNN  
 101 TALSAGSASVVPNSTAGTSIKPFTTFEEKDPTTGVINVFQSITCMPEYRNFSFEELRFQDYQAGRKFGTSONGTGTTFNNPOGTTNTGFGIMGNNNSTTS  
 201 ATTGGLFGOKPATGMFGTGTGSGGGFGSGATNSTGLFGSSTNLSGNSAFGANKPATSGGLFGNTTNNPTNGTNTNTGLFGOONSNTNGGLFGOONSFGAN  
 301 NVSNGGAFGOVNRGAFPOOOTOOGSGGLFGOSNANANGGAFGOOOGTGALFGAKPASGGLFGOSAGSKAFGMNTNPTGTTGGLFGOTN000SGGGLFGOO  
 401 ONSNAGGLFGONNOSONOSGLFGOONSSNAFGOPOOOGGLFGSKPAGGLFGOOOGASTFASGNAONNSIFGONN000OSTGGLFGOONNOSOSOPGGLFG  
 501 OTNONNNOPFGONGLOOPOONNSLFGAKPTGFGNTSLFSNSTTNOSNGISGNNL000SGGLFONKOOPAAGGLFGSKPSNTVGGGLFGNNOVANONNPAS  
 601 TSGGLFGSKPATGSLFGGTNSTAPNASGGIFGSNNASNTAATTNSTGLFGNKPVGACASTSAGGLFGNNNNSLNNNSNGSTGLFGSNNTSOSTNAGGLF  
 701 QNNSTSTNTSGGGLFSOPSOSMAOSONAL000000ORLOI0NNNPYGTNELFSKATVTNTVSYPIQPSATKIKADERKKASLTNAYKMPIKTLFTAKLKTN  
 801 NSVMDKAQIKVDPKLSISIDKKNQIAISNQOEEENLDESILKASELLFNPDKRSFKNLINNRKMLIASEEKNNGSQNNDMNFKSKSEEQETILGKPKMDE  
 901 KETANGGERMVLSSKNDGEDSATKHHSRNMDEENKENVADLQKQEYSEDDKKAVFADVAEKDASFINENYIISPLDTLSSYSLQLRQVPHLVVGHKSY  
 1001 GKIEFLEPVDLAGIPLTSLGGVITTFEPKTCIIYANLPNRPKRREGINVRARITCFNCYPVDKSTRKPIKDPNHQLVKRHIERLKKPNPSKFESYDADSG  
 1101 TYVFIVNHAAEQT

# NRP1

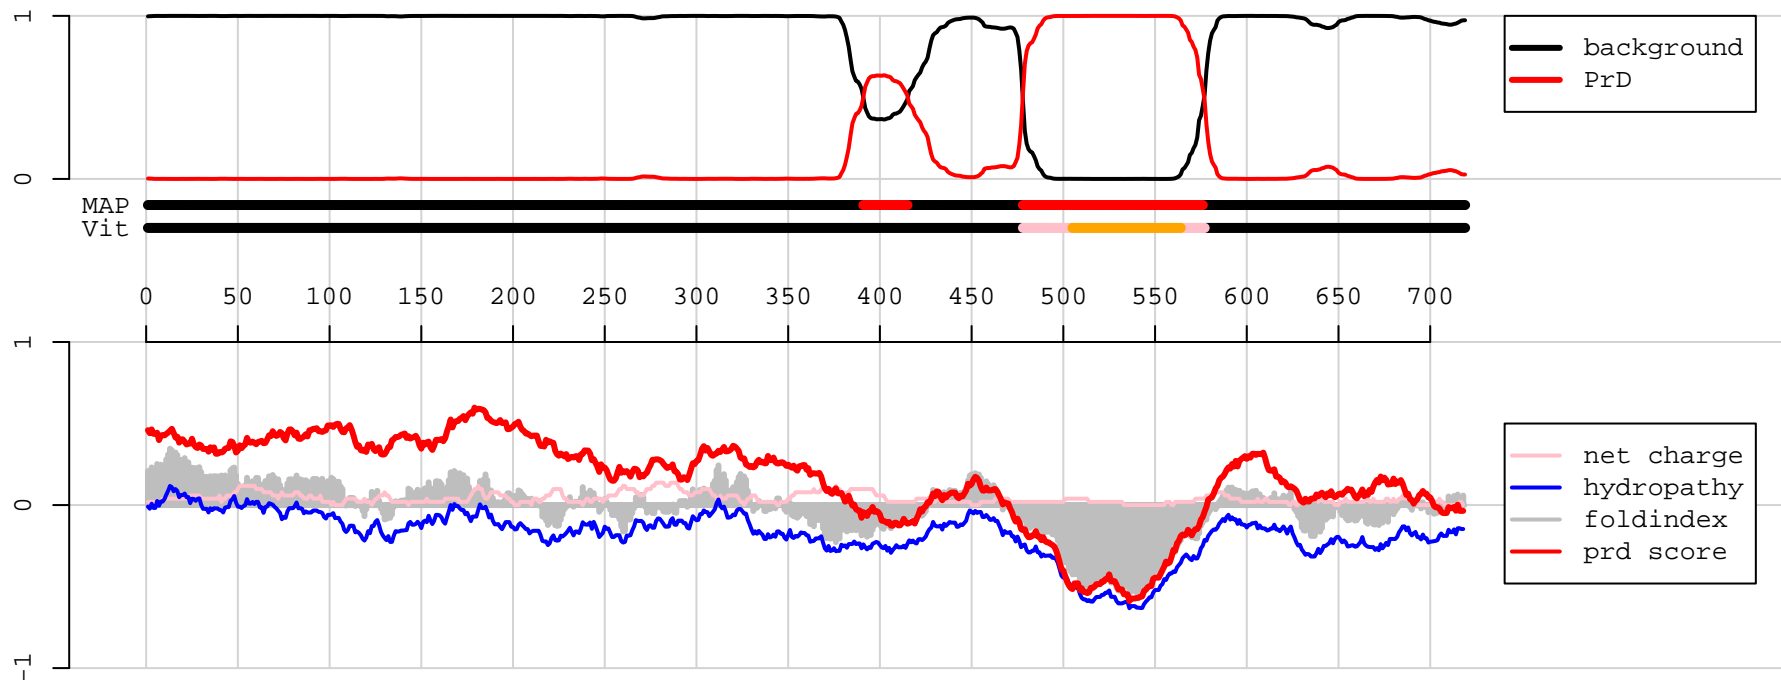

1 MHYVVLELQVAHLPTPKDQCRIANIAFQIVNAETLVCHYGTNSLPSIEVNGTTKSLESAMVQLDKDIHDVIGNDDFVLVSLYSTWHIRVTLPRQARDG  
 101 FILTSYLQHPKVFDLWKEFDRWCNVHPEILGQKKAISNNNCNTKSSISINAANKTKDLDEIVRILEVSIPTEEAGSVPEIYSLKRTTDILIQLHKKCTSP  
 201 EDMESVLTKPYDSHTDIRAFLQEKSKILYMNNLPPDTTQSELESWFTQYGVRPVGFWTVKNIVEDTSNVNNNWSLNNSPYVEDQDSISGFVVFQTHEEAT  
 301 EVLALNGRSILSNLANTKQPRVVEHVLELQPSSTGVLDKAOEILSPFPQSKNKPRPGDWNCPCSGFSNFQRTACFRCSFPAPSNSOIHTANSNNNVNSS  
 401 RNNLNRRVNSGSSSNISNTAANHPYGAPEFNMIANNTPAALTYNRAHFPAITPLSRQNSLNMAPSNSGSPILIIADHFSGNNNIIAPNYRYNNNINNNNNNII  
 501 NNMTNNRYNINNNINGNGNGNGNNSNNNNNNHNNNHNNNHNGSINSNSNTNNNNNNNNNGNNSNNCNSNIGMGGCGSNMPFRAGDWKCSTCTYHNFAKNVV  
 601 CLRCGGPKSISGDASETNYIDSSTFGPASRTPSNNNISVNTNGGNSNAGRTDGDNDNKRDISLMFEMSPPLSMATKSMKEGDGNGSSFNEFKSDKANVNF  
 701 SNVGDNSAFGNFNSSIRW

# SWI1

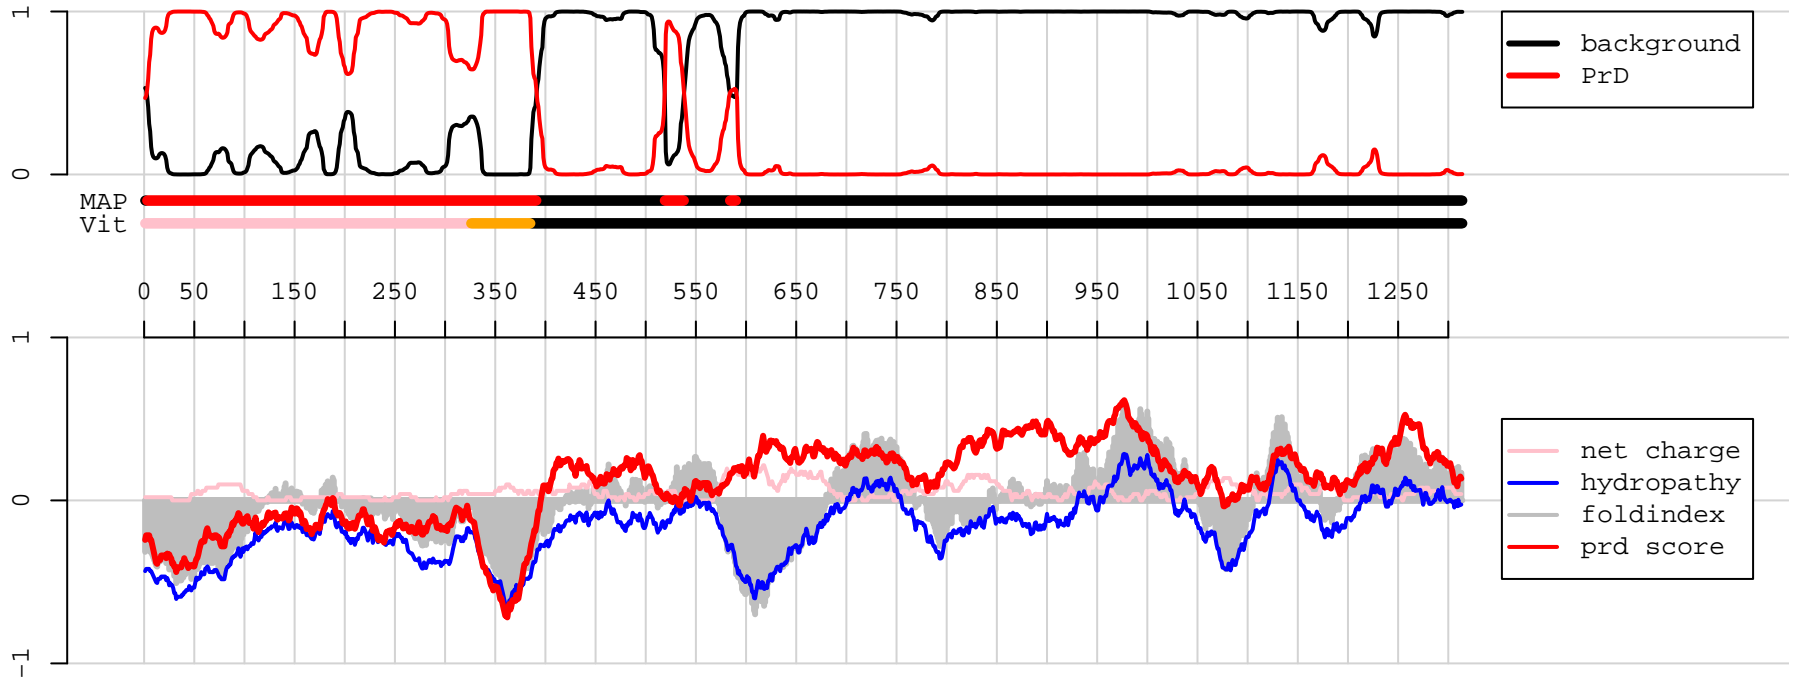

1 MDFFNLN.NNNNNNNNNTTTTTTTTNNNNNTNNNNNTNNNNNPANNTNNNNSTGHS SNTNNNTNNNNNTNTGA SGVDDFONFFDPK PFDONLD SNNNNNSN SNNNDN  
 101 NNSNTVASSTNFTSP TAVVNNAA PANVTGGKAANF IONOSP OFN SPYDSNNSNTNLNSL SPOA I LAKNS I IDSSNL PLOAQOQL YGGNNNNNTSTGI ANDN  
 201 VITPHFITNVOSISONSSSSTPNTNSNSTPNANOOF L PFNNSA SNNGNLTSNOLI SNYAA S NSMDR SSSA SNEFVPNTSDNNNN SNNHNMRNNS SNNKTSN  
 301 NNNVTAVPAATPANTNNSTSNANTVFSERAAMFAALOOKOORFOALOOOOOOOONOOOONOOPOOOOOOOONPKFLOSOROOOORSILOSLNPALQEKI  
 401 STELNKQYELFMKSLIENCKKRNMPLQSIPEIGNRKINLFYLYMLVQKFGGADQVTRTQQWSMVAQRLQISDYQQLESIYFRILLPYERHMISQEGIKE  
 501 TQAKRIFLQQFLOELLKKVQQQQAAALANANNINSASSAPTPAAPGASVPATAAPGTEAGIVPVSANTPKSLNSNININVNNNNNIGOOVKKPRKORV  
 601 KKKTKKELELERKEREDFOKROOKLLEDOOROOKLLLETKLROOYEIELKKLPKVYKRSIVRNYKPLINRLKHYNGYDINYISKIGEKIDS NKPIFLFAP  
 701 ELGAINLHALSMSLQSKNLGEINTALNTLLVTSADS NLKISLVKYPELLDSLAILGMNLLSNLSQNVVPPYHRNTSDY YEDAGSNQYYVTQHDKMVDKIF  
 801 EKVNNNATLTPNDSNDEKVTILVDSL TGNQLPTPTPEMEPDL DTECFISMQSTSPAVKQWDL LPEPIRFLPNQFPLKIHRTPYLTSLKKIKDEIDDPFT  
 901 KINTRGAEDPKVLINDQLSTISMILRNI SFSDNNSRIMSRNFYLKRFISDLLWLVL IHPENFTCNRKILNFKKDLVIVLSNISHLLEIASSIDCLLILIL  
 1001 VISFGQPKLNPMASSSSFGSESLTFNEFQLQWQGYQTFGVDILAKLFSLEKPNLNYFKSILLNKNTGN NLYDRNSNNHKDKKLLRLLNLYNDNNKNNN  
 1101 NRHLLNDVVSFLFSAIPLQQVLSQSADPSLLIDQFSPVISQSLTSILVIVQKILPLSNEVF EISENNSDSNSNNGNKGDS SFFNFKNL PFWLSSEENI  
 1201 GSGLLKLSEIILNINNSTSKNTLLQQQNYSKVLLPSINISCVQLIKCLVEKSICFENCLNNDPEILK KIASIPNLFPTDLEIFQLFTNPSVDIQIINQYQ  
 1301 LLYNLKNDILT NLE



# YBR108W

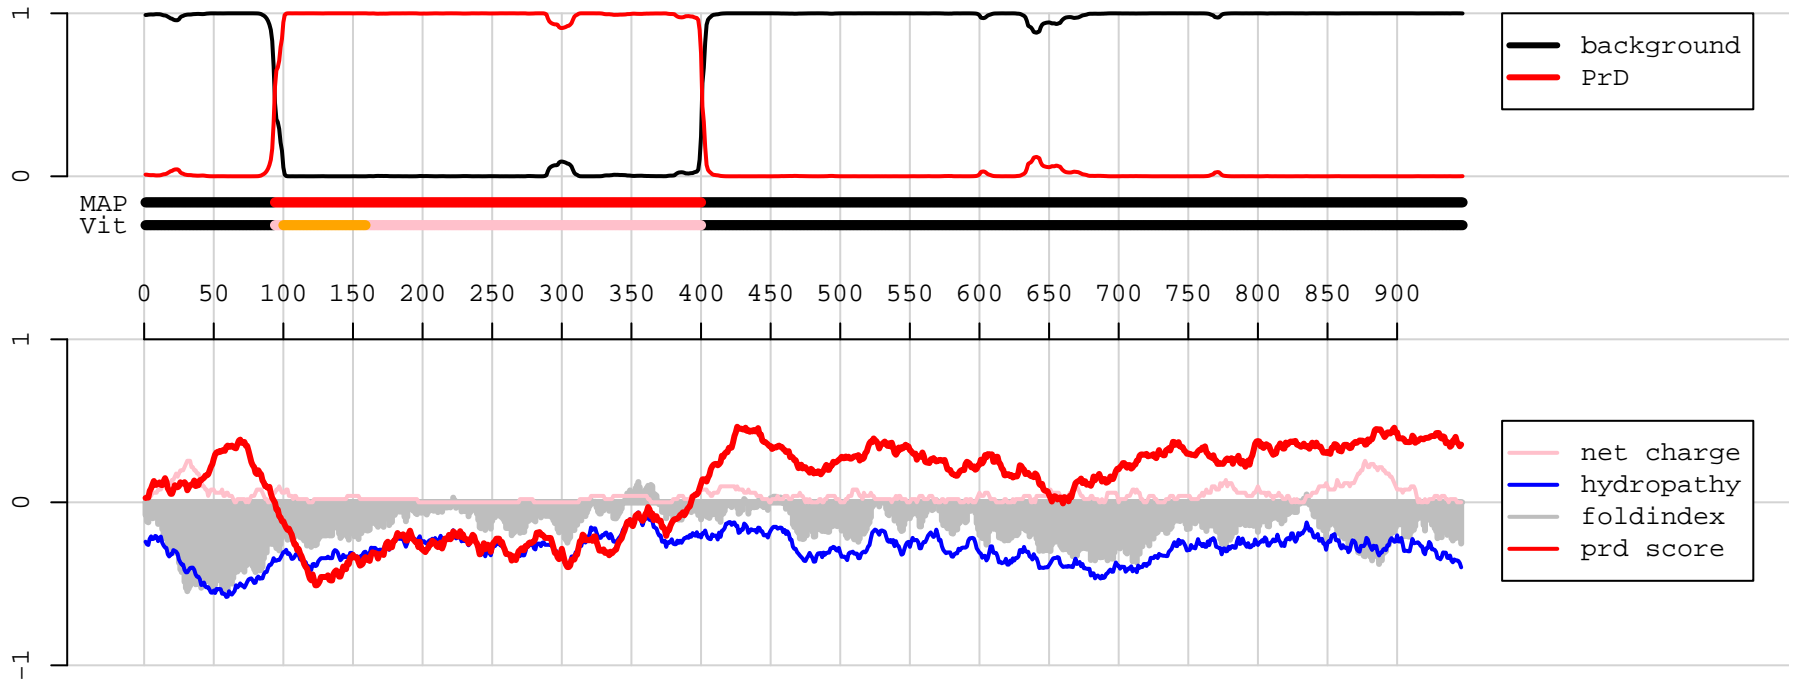

1 MGFWENNKDSITSLGKSAGKYGYQGTYVAKTGYKASKKHYNNSKARRERKSGKKNSSDEEYDSEDEMEYERKPTDIRSLKDPKSFPPPLPKPGOKTYTG  
 101 QOOOOMPNGOASYAFOGAYOGOPGAGSTEOSOYAPOYNOYPOOOLOOGVMP0000LOOGVVPOOPPIYGEVPPYGSNSNATSYOSLPOONOPONAI  
 201 QVSLNSASOOSTGFVSONLOYGTOSNPA P S P S F O N G L O C H O O P O Y V S H G S T N L G O S O F P S G O O O P T T O F G O O V L P S P A O P O O O O G O P L P P P R G O V I L  
 301 P A P G E P L S N G F G O O O O O O O O O O P L N O N N A L L P O M N V E G V S G M A A V O P V Y G O A M S S T T N M O D S N P S Y G A S P M O G O P P V G G O P P V P V R M O P O P P O P M O O G N  
 401 IYPIEPLDSTGSTPHFEVTPFDPDAPAPKPKIDIPTVDVSSLPPPPTHDRGAVVHQEPAPSGKIQPNTTSSAASLPKHSRTTTADNERNNSGNKENDE  
 501 STSKSSILGHYDVDANIMPPPKPFRHGLDSVPSEHTTKNAPERAVPILPPRNVEPPPPSRGNFERTESVLSTNAANVOEDPISNFLPPPKPFRHTETK  
 601 QNQNKASPVEMKGEVLPGHFSEEDRNVEPSLVPOSQSQSOFRAHMETQPIQNFOPPPKPFRRSQSSNSDSSYITIDGPEANHGRRGRGRIAKHHDGD  
 701 EYNPKSENSTENGR LGDAPNSFIRKRAPTPPAPSRSEKLHEGTITSEVDSSKDANKYEKSI PPVTSSIQAAQSTKKAPPPVVKPKPRNFSLKANEYPKEL  
 801 TREATGQDEV LNSITNELSHIKLRKTNVNLEKLGGSKKVKDSSPVPSDLDEKYVSASGSITPPRPPPSRSSPKKVPPVVPKKNLNLKKKPPVVPKPKLL  
 901 KSLEPRPIEMERAYSGDISAADDNLNPFERYKRNVPQEDDRLHKLK

# SAP30

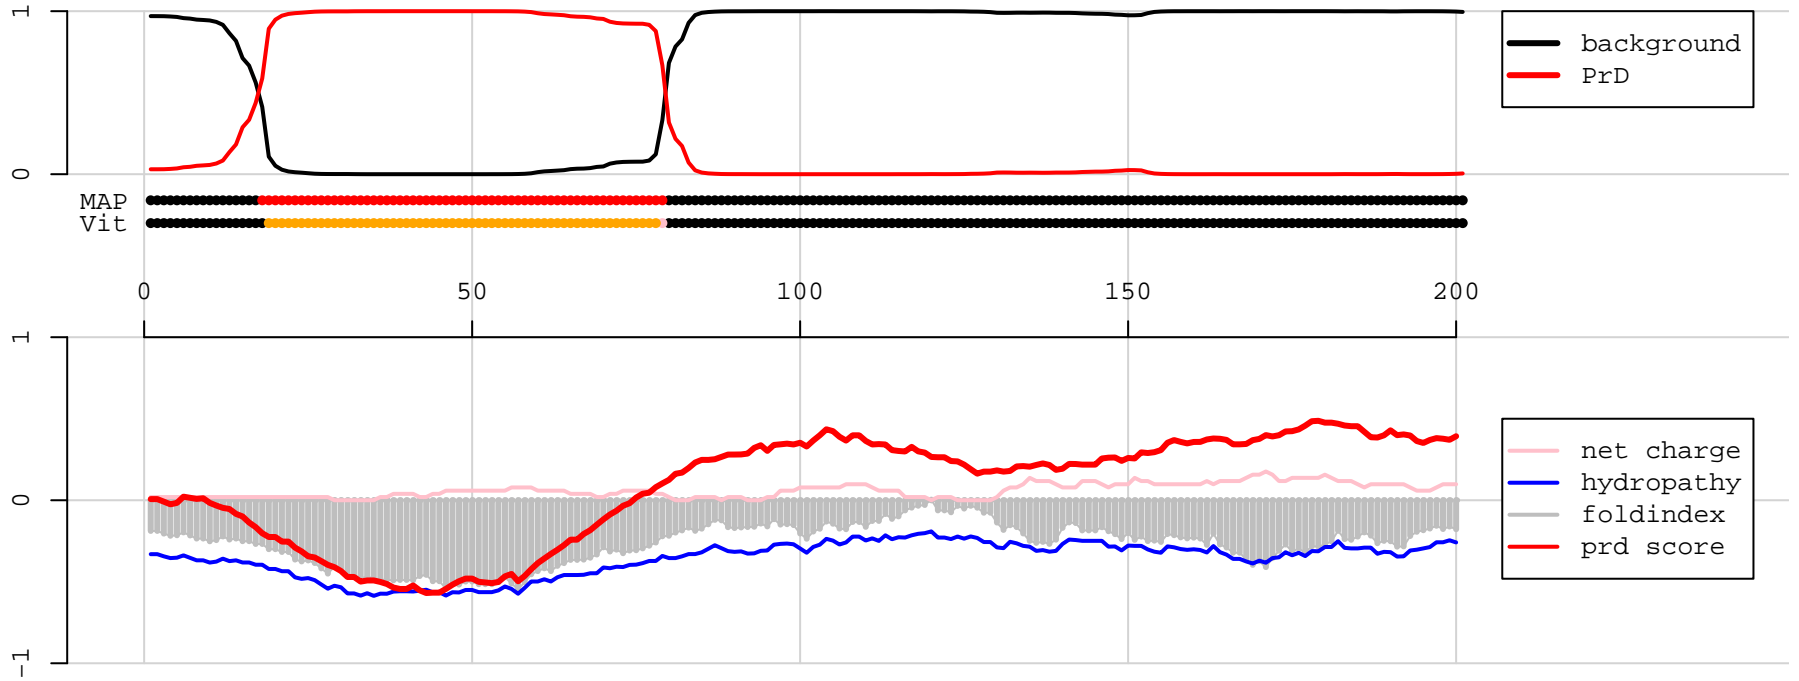

1 MARPVNTNAETESRGRPTOGGGYASNNNGSCNNNGSNNNNNNNNNNNNNNNSNNSNNNNGPTSSGRTNGKORLTAAOOQYIKNLIETHITDNHPDLRPKSH  
 101 PMDFEETDAFLRRYKDFQLDVPDNLTLQGYLLGSKLGAKTYSYKRNTQGQHDKRIHKRDLANVRRHFDEHSIKETDCIPQFIYKVKNOKKKFKMEFR  
 201 G



# MCA1

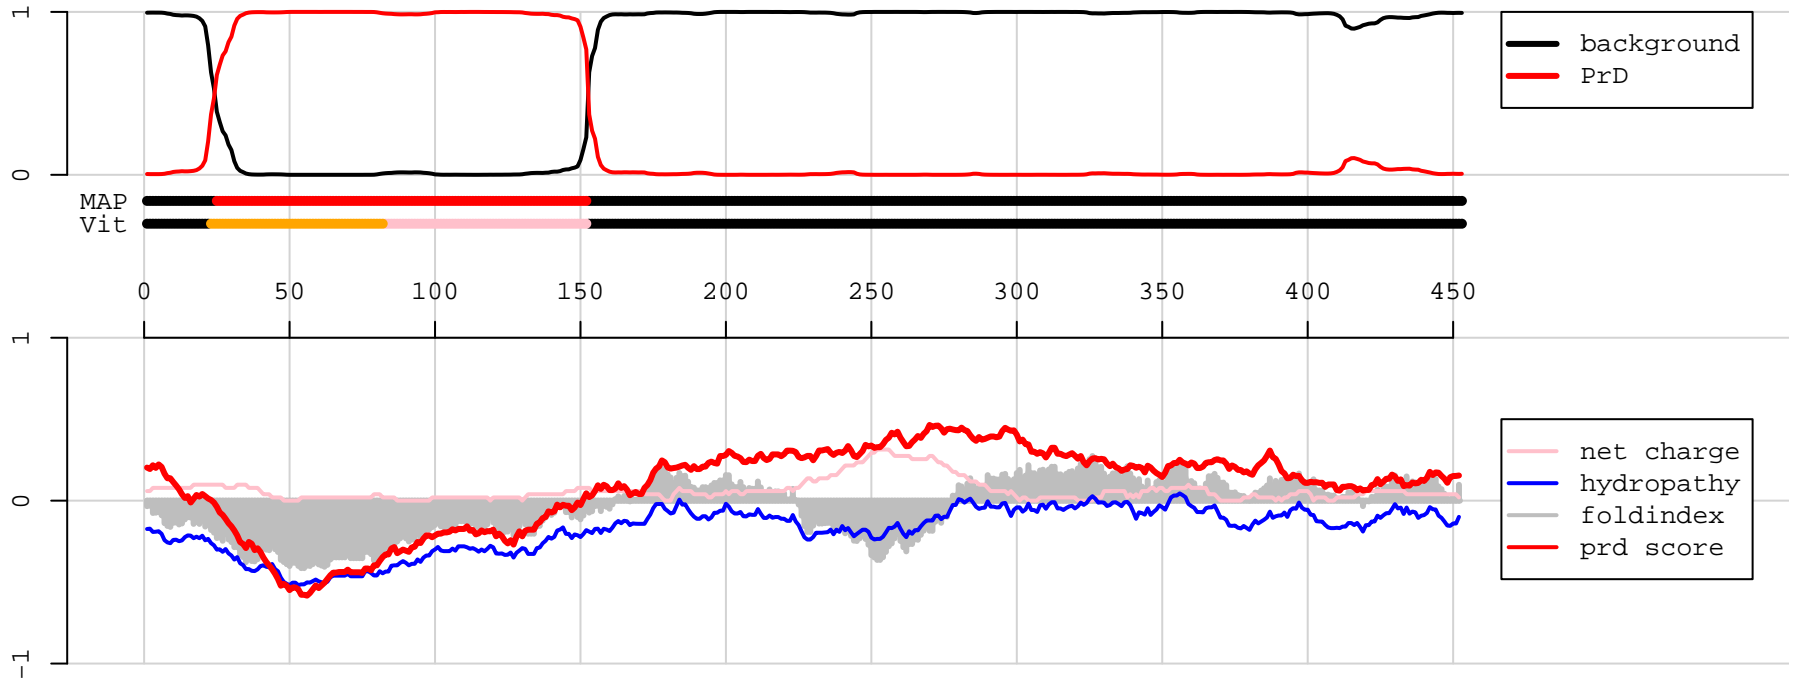

1 MKMSLEVYLN~~YHQRRP~~TRFTIMYPGSGRYTYNNAGGNNGYORPMAPPN~~OOYGOOYGOOYE~~OOYGOOYGOONDOOF~~SOOYAP~~PPGPPPMAYNRPVYPPPO  
 101 ~~FOOE~~OAKAOL~~SNGYNNPNVNA~~SNMYGPPONMSLPPOTOTI~~OGTDOPYOYS~~QCTGRRKALIIGINYIGSKNQLRGCINDAHNIFNFLTNGYGYSSDDIVI  
 201 LTDDQNDLVRVPTRANMIRAMQWLKDAQPND~~SLFLHYS~~HGGQTEDLDGDEEDGMDDVIYPVDFETOGPIIDDEMHDIMVKPLQGGVRLTALFDSCHSG  
 301 TVLDLPYTYSTKGI~~IKEPNI~~WKDVGQDGLQAAISYATGNRAALIGSLGSIFKTVKGGMGNVDRERVRQIKFSAADV~~VMLSGSKDN~~QTSADAVEDGQNTG  
 401 AMSHAFIKVMTLQPQ~~QSYLSLLQ~~NMRKELAGKYSQKPQLSSSHPIDVNLQFIM



## UPC2

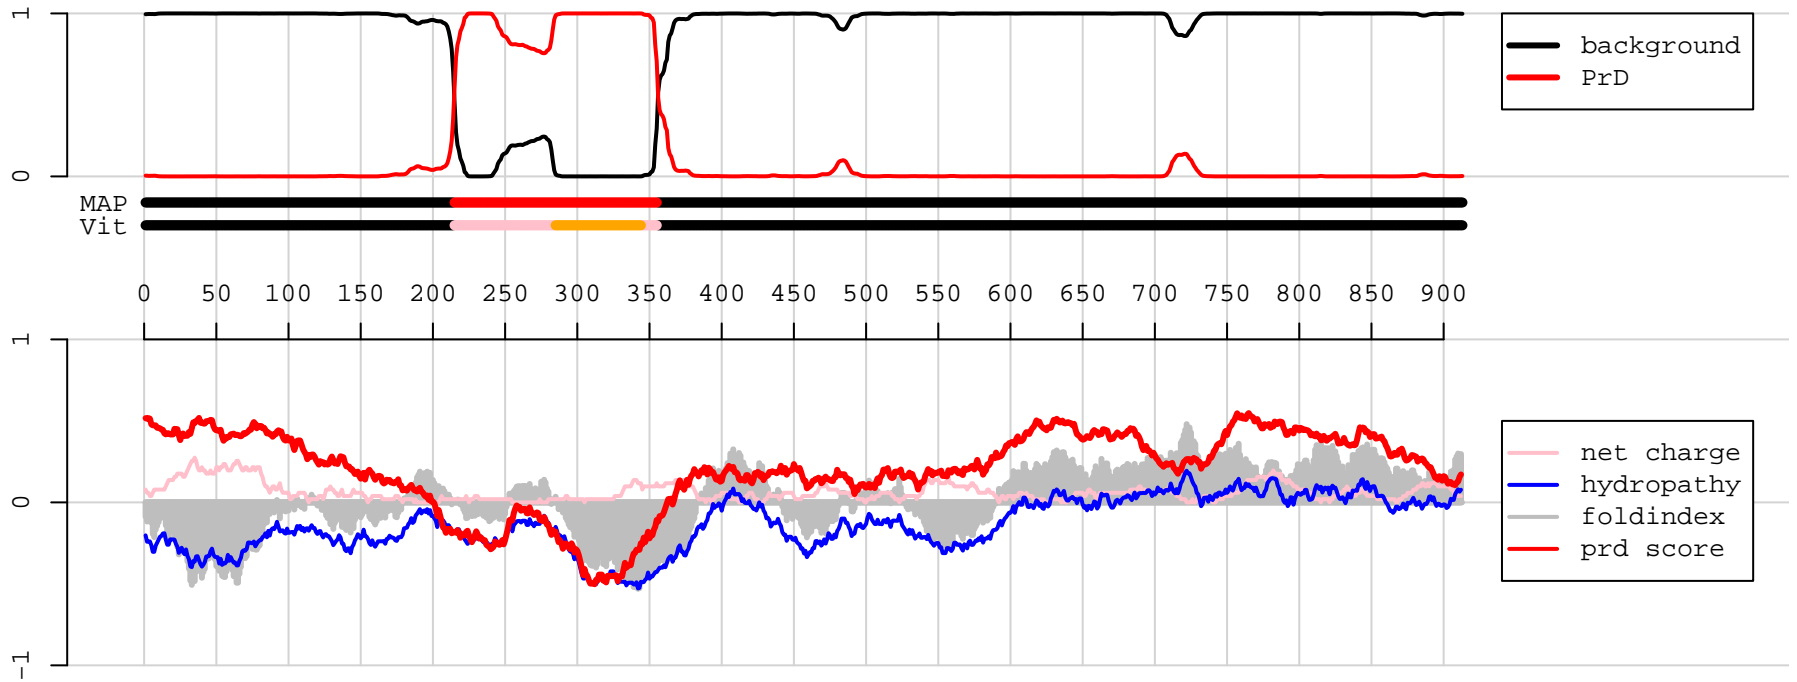

```

1  MSEVGIQNHHKAVTKPRRREKVIELIEVDGKKVSTTSTGKRKFHNKSKNGCDNCKRRRVKLCDEGKPACRKCTNMKLECYTPIHLRKRGRGATVVKYVTRK
101 ADGSVESDSSVDLPPTIKKEQTPFNDIQSAVKASGSSNDSFPSSASTTKSESEEKSSAPIEDKNNMTPLSMGLQGTINKKDMNNFFSQNGTIGFGSPER
201 LNSGIDGLLLPPLPSGNMGAFOL0000V000SOPOTOA00ASGTPNERYGSFDLAGSPALOSTGMSLSNSLSGMLLCNRIPSGQNYTQOOLQYQLHOOL
301 QLOOHOOVLOOYQOOLROEOHOOV00000EOL00YOOHFL0000OVLLOOE0OPNDEEGGVOEENSKVKKEGPLQSOTSETTLNSDAATLQADALSQLSK
401 MGLSLKSLSTFPPTAGIGGVSYDFQELLGIKFPIINNGNSRATKASNAEEALANMQEHHERAAAASVKENDGQLSDTKSPAPSNAQGGSASIMEPQAADAVS
501 TMAPISMIERNMNRNSNISPSSTPSAVLNDRQEMQDSISSLGNLTKAALENNEPTISLOTSOTENEDDASRQDMTSKINNEADRSSVSAGTSNIAKLLDLS
601 TKGNLNLIDMKLFHHYCTKVWPTITAAKVSGPEIWRDYIPELAFDYPFMLHALLAFSATHLSRTETGLEQYVSSHRLDALRLLREAVLEISENNTDALVA
701 SALILIMDSLANSNGTGVGNQSLNSMSPSAWIFHVKGAATILTAVWPLSERSKFHNIISVDLSDLGDVINPDVGTITELVCFDESADLYPVGLDSPYL
801 ITLAYLDKHLHREKNQGDFILRVFTFPALLDKTFLALLMTGDLGAMRIMRSYKLLRGFATEVKDKVWFLEGVTQVLPQDVDEYSGGGGMHMLDFLGGGL
901 PSMTTTFNSDFSL
  
```

# YDL012C

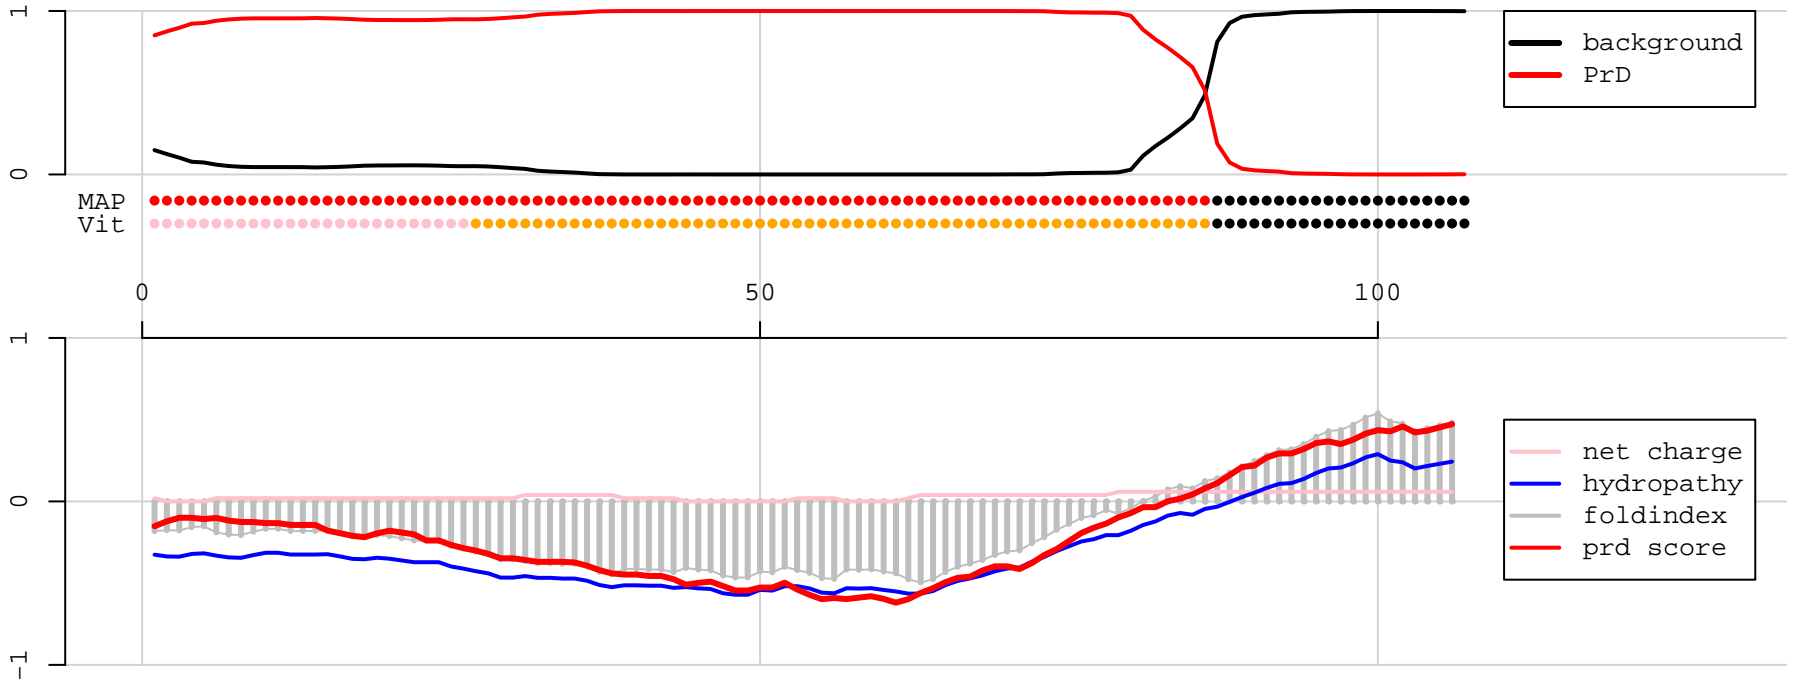

1 MSAODYYGNSASKOSYSRPSAPPPGYETASRGYAPSOSOONYYPPOOOOOOYOOPOYYOOOPOYYOOHPPOPIYVOOQPASSGNEDCLAGCLAGLCLC  
 101 CTLDMLF



# YPR022C

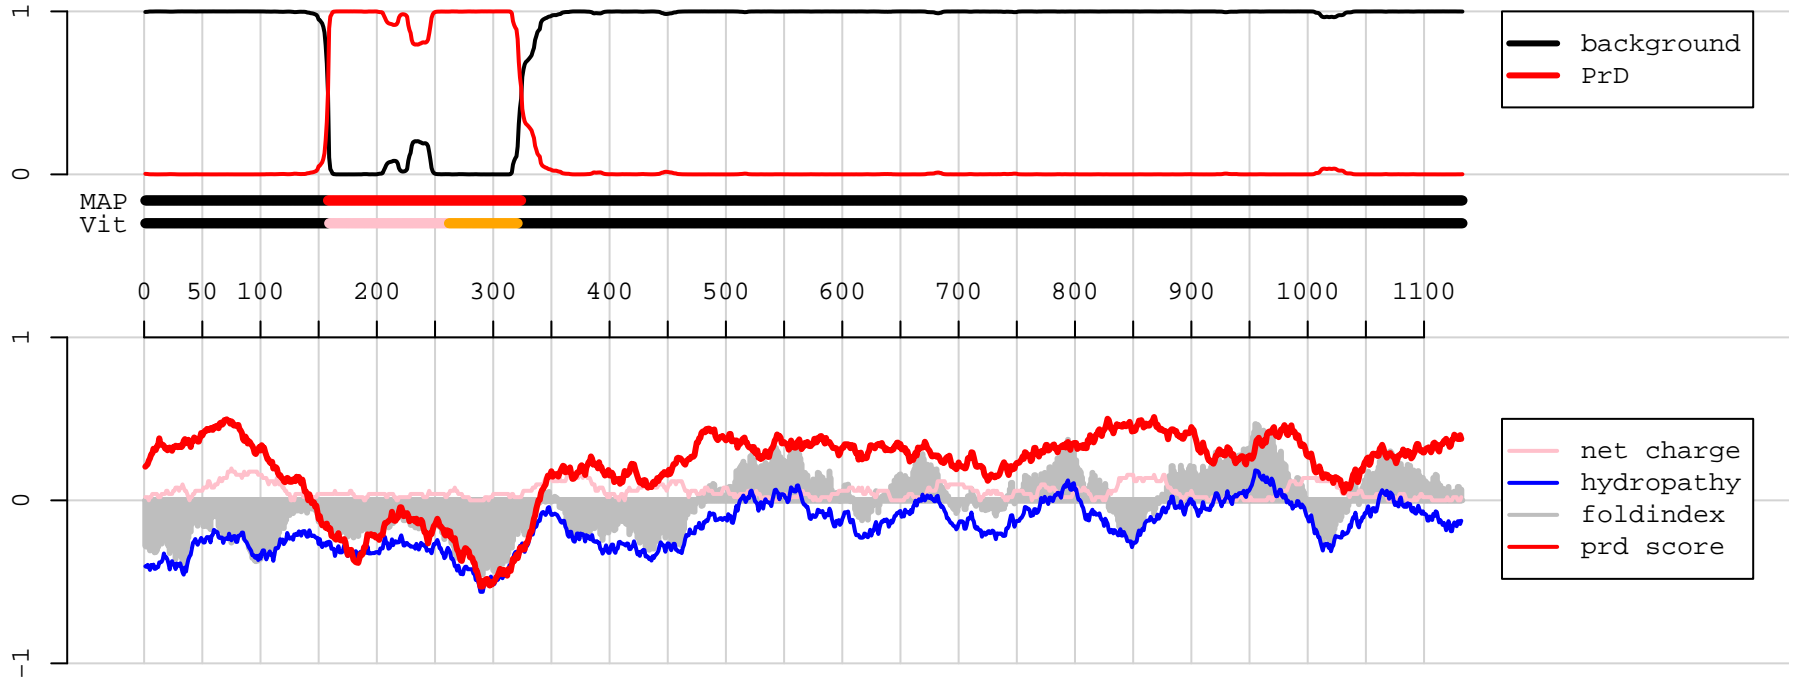

```

1  MHGKELAGRLRKRENDNDLSPNSSSSPAERFRCPHPECNKTFSRQEHLSRHKLNHWPKEIYVCSYVLPPTNAPCNKTFVRKDLLIRHEKRHSKVNRLSR
101  PSKDQISSNKDFSKNAPYNPSEVPLSTQSGTSTINLIKNSVNPPPSITQESKFRPFLQQAQPOOVOOSQOPOOIQOOLQOLOFPOOLRAPLOOPLQOQ
201  MHPOQA SPTFP SYDPR IRNNGONGNOFFNLI FDNRTGVNGFEVDAANNNGNGNDONMNIINP AVQOORYODRNFASSSYOOPLOPLTODQOQEOYFOOKL
301  AAAAAAAAAAAAAAAAAAQLPPONPFGDPLTSSSSGANLSVMQDLFSTNFLNSDPLQSFMOELSEAPOVSIEDTFSDKNTIPPNEKPVOQDEGFONPPVMFEL
401  PQDNIKIPKAQPKFNDNPSTSVKDNLSSQKLNINELKRRSSKDSGVGNSSSLNYKEQLRHSMSKSVPSFFHPDPLTKYKISKEKCQEMFSFVPELRYVSI E
501  SIHKSLSFWLNFHPQYGLLHKPSFHVDKQPAILNLALIMTGASFLGSEYREQISDPICGPLRWIIFSHADFQPPSKTYIIQSLLLVEGYEKTSTNRYLH
601  ERSFLHHGTTIQLLRRTPSLGGHPLMVKTGKTSGENSIQDPQEVYKRWIDFEMLKRIAFYAFYMDTTHAVVFGYWNLFINSNQIQTLPCPDQVWESYDL
701  SYETLMEHGYGSTKRDENNTFLSALMQLMKNVIOILRNNNIRRNKVNNGGIESTPTDLESTTDWNIQSLFGKKILLAGIISILFQCQEEVNGDYFITNFR
801  GGITDHLGLSWKDILSFAMNYWLHEVQKSCDTPKACRISTPSEETLTNRKIDEDNGDGLCDDDLDLLSSDNPSNCKIPVIHISQIVLRILHHDYIYAGA
901  PWRMNPVPIGRDEYDMISRILQFAKDPYNGGVAVVYAFQFLFEMFI IKENNVPTVVKSYNINSDPVITRPYAIALTSLLIWSCNFALHGCEVSIWDNTEA
1001 SKDECFQPDSSNGGNILGNTDNNGSTIANNNLKEKNYIPIESFEVYLLRMYRNLYVDS SLDVVSFQNDVWAKASLLQHISNTHFLCGMMQFMRDIFNKS
1101 YWDLGREFGKLFDNCLERSLGKTSPTCHNMFV
  
```

# YCK1

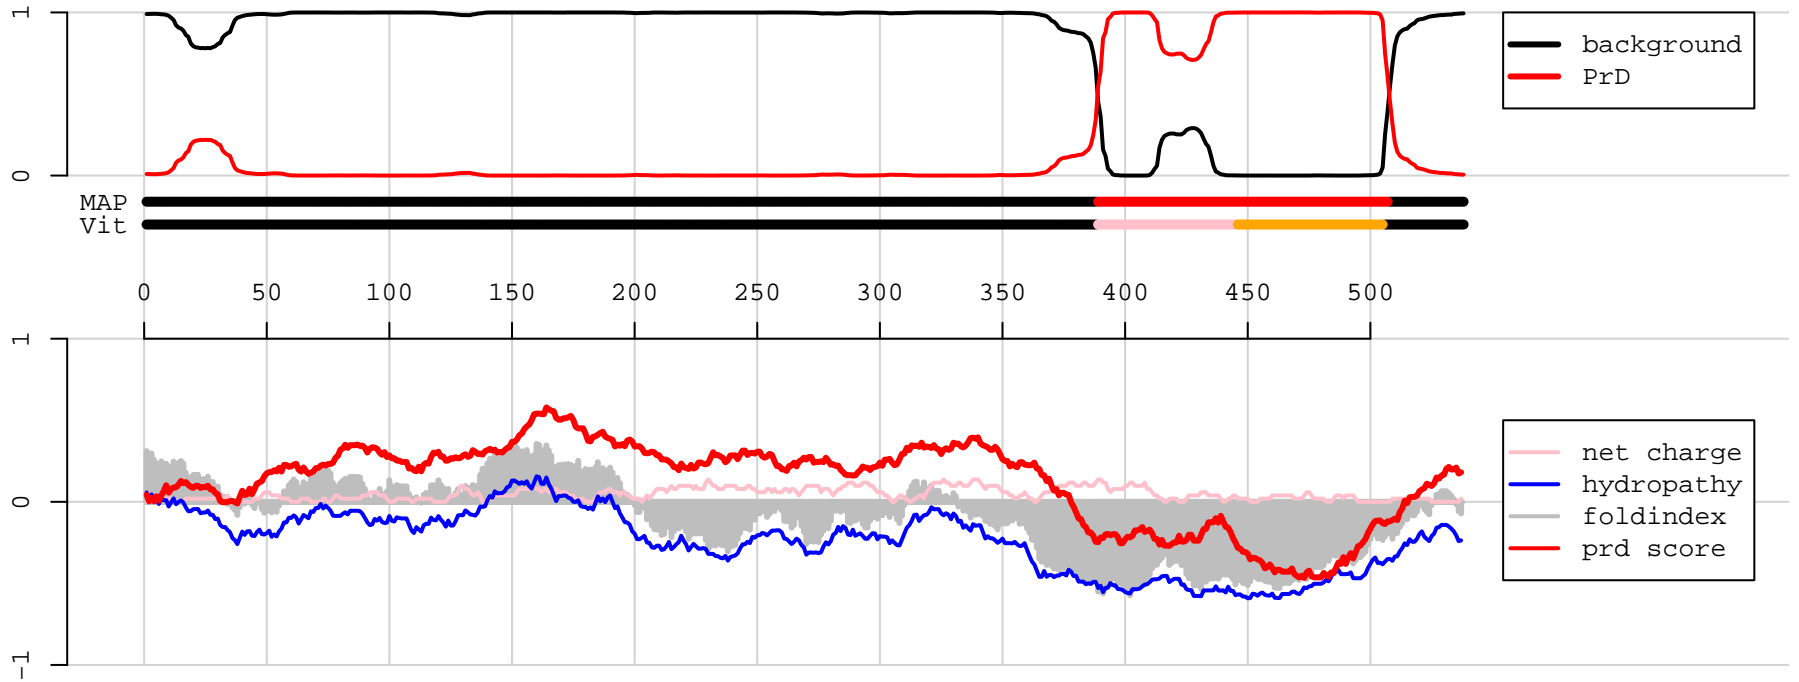

1 MSMPIASTTLAVNNLTNINGNANFNVQANKQLHHQAVDSPARSSMTATTAANSNSNSRRDDSTIVGLHYKIGKKIGEGSFGVLFEGTNMINGVPVAIKFE  
 101 PRKTEAPQLRDEYKTYKILNGTPNIPYAYYFGQEGLHNILVIDLLGPSLEDLFDWCGRKFSVKTVVQVAVQMITLIEDLHAHDLIYRDIKPDNFLIGRPG  
 201 QPDANNIHLIDFGMAKQYRDPKTKQHIPYREKKSLSGTARYMSINTHLGREQSRDDMEALGHVFFYFLRGHLPWQGLKAPNNKQYKIGEKKRSTNVY  
 301 DLAQGLPVQFGRYLEIVRSLSFEECPDYEGYRKLKLLSVLDDLGETADGQYDWMKLNDRGWDLNINKKPNLHGYPNPPNEKSRKHRNKOLOMOLOMO  
 401 OL00000000YAOKTEADMRNSOYKPKLDPTSIEAYOHOTOOKYLOE00KRO000KLOE00LOE00LO00000000LRATGOPPSOPQAOTOSOFGARY  
 501 OP000PSAALRTPEQHPNDDNSSLAASHKGGFFQKLGCC

## MED2

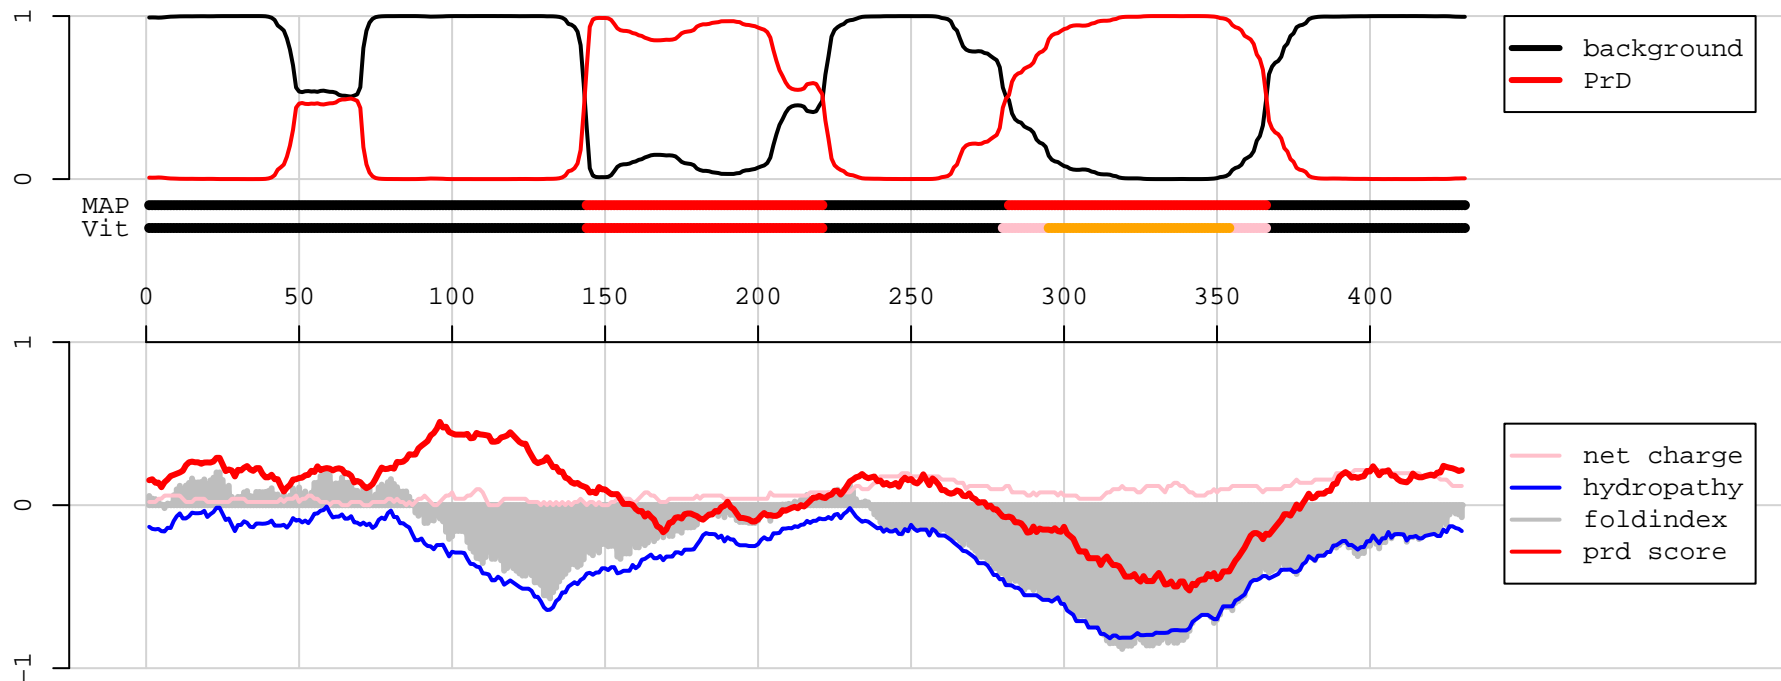

1 MVVQNSPVSSVHTANFSEKRSNTRTMTYKNKLTVCFDDILKVGAEEMMQQLKNVQLDSYLVNGFSQSQQKLLKEKVKLFHGILDDLETSLSQSSSYLET  
 101 LTALGKEKEKEREKRAEQENMRKRVREQEELKKRQEELEASOOOOLQONSKEKNGLGLNFSSTTAPANTTDANGSKENYOELGSLQSSSOTOLENANA  
 201 ANNGAAFSPLETTTRIQSQAQPSDVMFNDLNSMDISMFSGLDSTGFDSTAFNATVDETKGFDDNDSGNNYNDINISSIENNINNNININSTKNGKDNNESEN  
 301 KNNNGDEKNKNNNEDNENNNNSSEKNNNNNNNNNNNNDDNGNNNNNNNSGNDNNNTTNNDSNNKNNISITTGNDNENIVNNDLPTTVVSNPQDNPPADNGE  
 401 EYLTLDNDFNDLNDWSTTGDNGELDLSGFNI



# SLM1

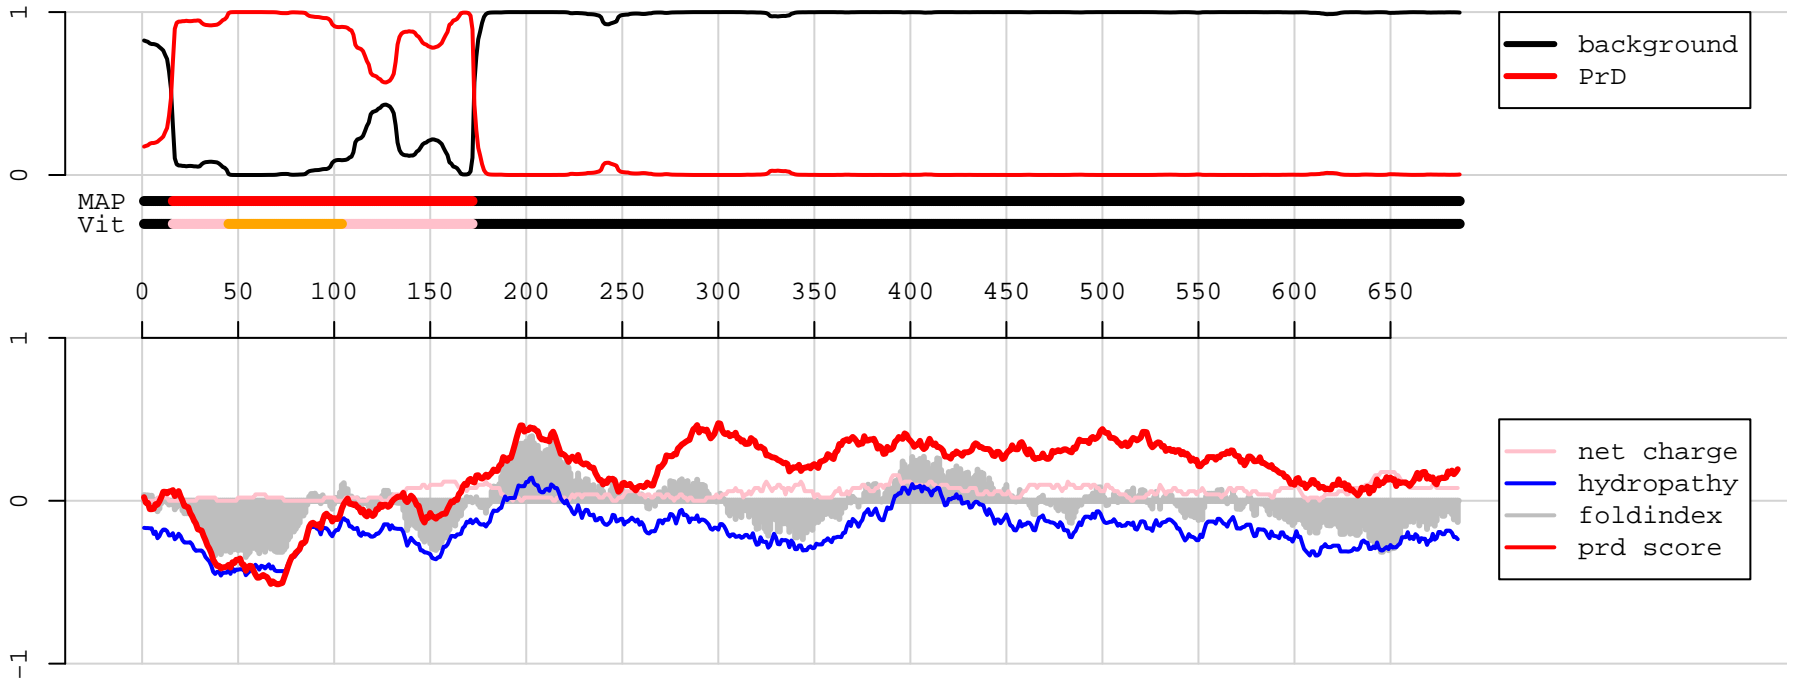

1 MSKNNMTMSAVSDMLSOOQLNLOHLHNLLOHTRSMTSADHANVLOOOOOOOOOOOOOOOOOOOSASFONGSLTSDINOOSYLNQOPVPSTSNSTFONNRT  
 101 LTMNSGGLOGIISNGSPNIDSNTNVTIAVPDPNNNNGKLOGKNSLTNTSILSRARSSLORORLAOOOQQQDPRSPLVILVPTAAQPTDILAARFSAWR  
 201 NVIKSVIVYLTEIASIQDEIVRQQLRLSHAVQFPFFSIEHQYQPSSQEDKSVQKFFLPLGNGSIQDLPTILNQYHESLASSASKASRELTNDVIPRLEDL  
 301 RRD LIVKIKEIKSLQSDFKNSCSKELQOTKQAMKQFOESLKDARYSVPKQDPFLTKLALDRQIKKQLQEEFLHEAFDNLLETSGAELEKIVVMEIQNSLT  
 401 IYARLLGQEAQLVFDILISKLD SGFFNVDPQFEWDFNFSRDPNFPNLPMPRTFKEIVYKYQFDPLTYEIKSGFLERRSKFLKSYSKGYVLT PNFLEHF  
 501 KTADRKKDLVPVMSLALSECTVTEHSRKNSTSSPNSTGSDAKFVLHAKQNGIIRRGHNWVFKADSYESMMSWFDNLKILTSTSNIQDKYKFITQKLNLS  
 601 DGKPKLTNNHTSINKYQLSNANSTMVENDENDDINSNYVGSTVTPKLDNQTNTNTSMSSLPDTNDSELDQVQVNIYIQTPI NDFKS

# PGD1

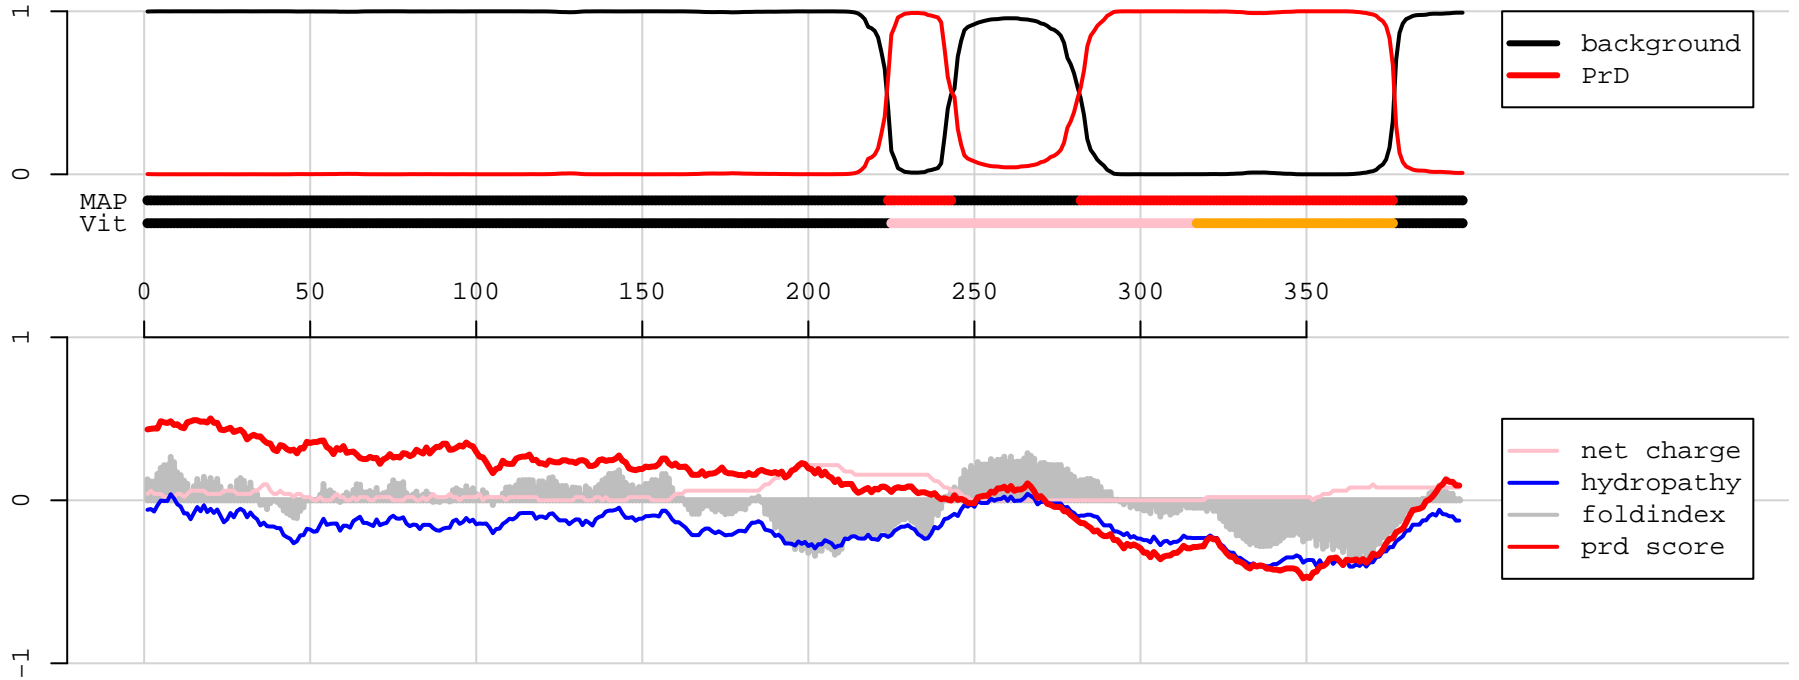

1 MDSIIPAGVKLDDLQVILAKNENETRDKVCKQINEARDEILPLRLQFNEFIQIMANIDQEGSKQADRMAYLHIRDKILQLNDRFQTLSSHLEALQPLFS  
 101 TVPEYLKTADNRDRSFQLEPLSTYNKNGNAVCSTATVVSTNHSAAASTPTTTATPHANPITHAHSLSNPNSTATMQHNPLAGKRGPKSGSTMGTPTVHN  
 201 STAAAPIAAPKKPRKPRQTKKAKAQAQAQAQAQVYAQQSTVQTPITASMAAALPNPTPSMINSVSPTNVMGTPLTNMMSPMGNAYSMGAONOGGOVSM  
 301 SOFNGSGNGSNPNTNTNSNNTPLQSOLNLNLLTPANILNMSMNNDFOOOOOOOOOOPOPOYNMNMGMNMMNNGKELDSLNLNLELGGLNMDFL

# YAP1801

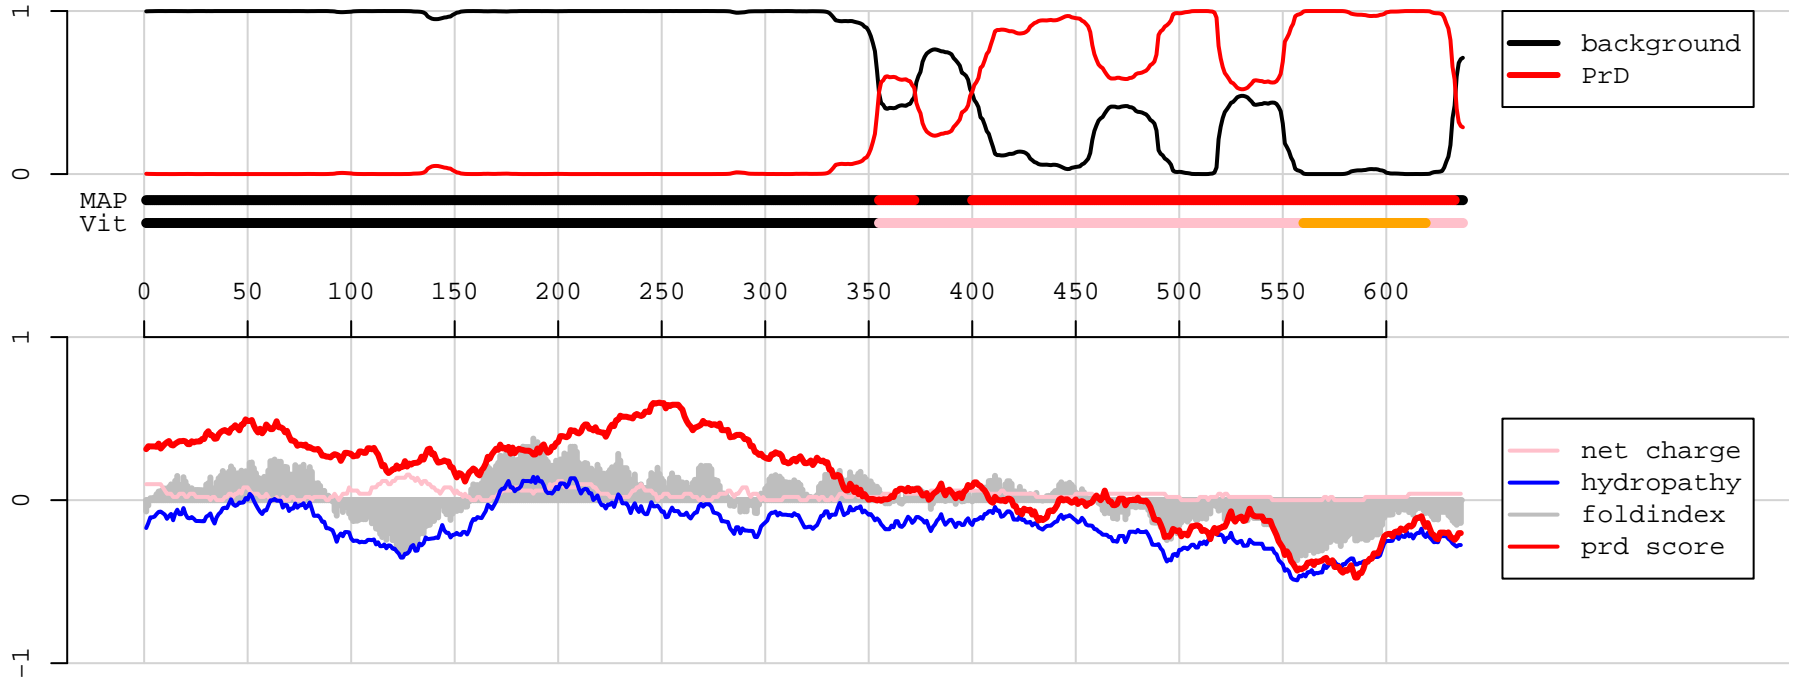

1 MTTYFKLVKGATKIKSAPPKQKYLDPILLGTSNEEDFYEIVKGLDSRINDTAWTIVYKSLLVVHLMIREGSKDVALRYYSRNLEFFDIENIRGSNGSASG  
 101 DMRALDRYDNYLKVRCREFGKIKKDYVRDGYRTLKLNsgNYGSSRNKQHSINIALDHVESLEVQIQALIKNKYTQYDLSNELIIFGFKLLIQDLLALYNA  
 201 LNEGIITLLESFFELSHHNAERTLDLYKTFVDLTHEVVRYLKSgKTAGLKIPVIKHITTKLVRSL EEHLIEDDKTHNTFVPVDSSQGSAGAVVAKSTAQE  
 301 RLEQIREQKRILEAQLKNEQVAISPALTTVTAQSYNPFgTDSSMHTNIPMAVANOTQOIANNPFVSQTQPQVMNTPTAHTEPANLNVPEYAAVQHTVNF  
 401 NPVQDAGVSAQQTGYYSINNHLTPTFTGAGFGGYSVSODTTAASNQOVSHSOTGSNNPFALHNAATLIATGNPAHENVLNNPFSRPNFDEONTNMPLOOI  
 501 ISNPFONOTYNOOFQOKMPLSSINSVMTTPTSMOGSMNIPORFDKMEFOAHYTONHLOOOOOOOOOOOOOOOOOPOOGYYVPATAGANPVTNITGTVO  
 601 PONFFPYPOOOPOPEOSOTOPVILGNOYANNLNLIDM

# RLM1

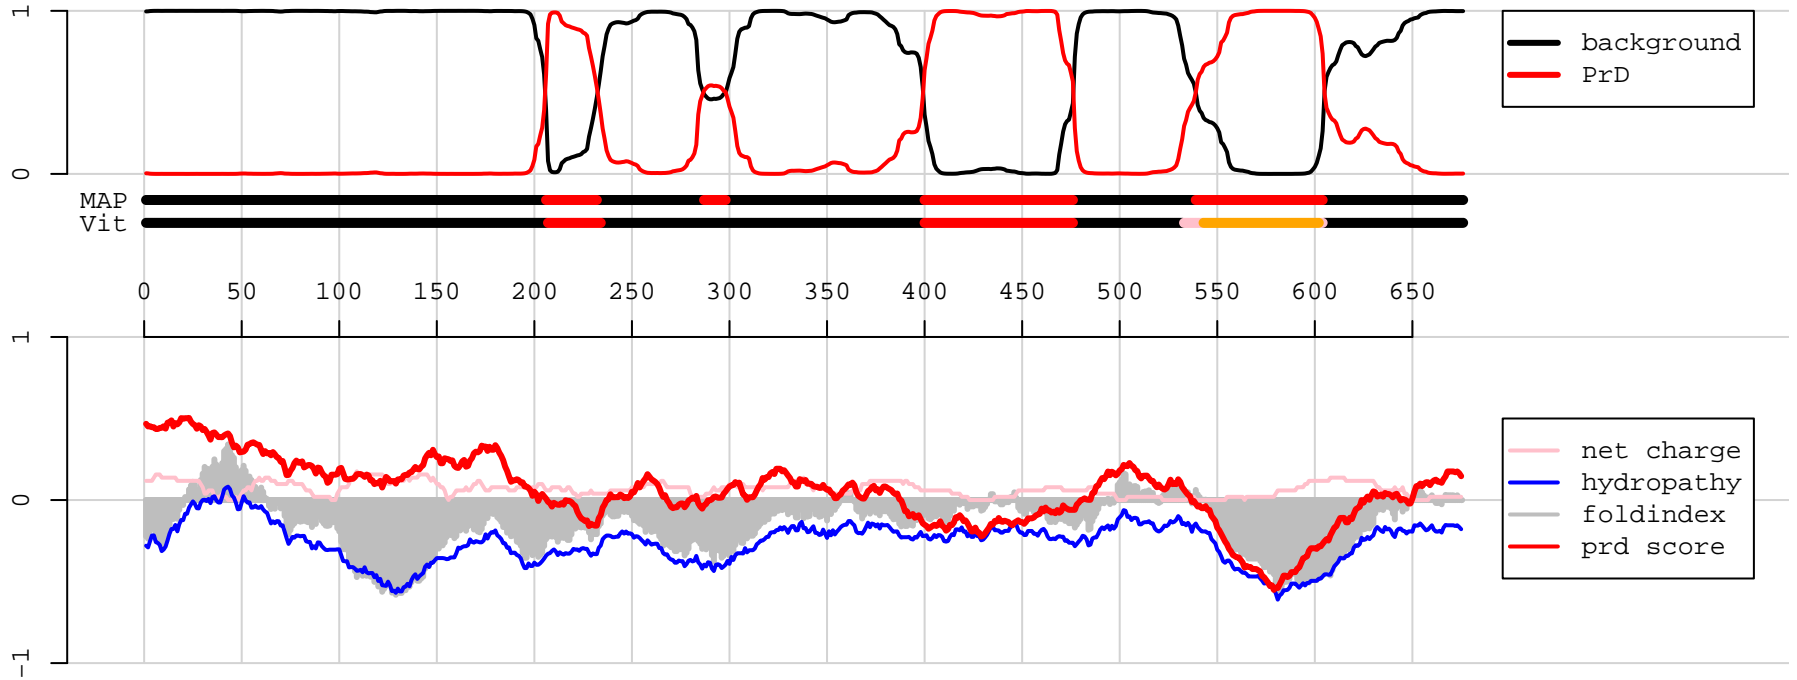

1 MGRRKIEIQRISDDRNRAVTFIKRKAGLFKKAHEL SVLCQVDIAVIILGSNNTFYEFSSVDTNDLIYHYQNDKNLLHEVKDPSDYGDFHKSASVNIQDL  
 101 LRSSMSNKPSKSNVKG MNQSENDDDENDEDDDDHGNFERN SNMHSNKKASDKNIPSAHMKLLSPTALISKMDGSEQNKRHPENALPPLQHLKRLKPDPL  
 201 QISRTPQQQQQONISRPHYSSMYNLNQPSSSSSSPSTMDFPKLP SFQNSSFNRPPI SISPNKFSKPF TNASSRTPKQEHKINNSGSNNNDNSNYTQSP  
 301 SNSLEDSIQOTVKARRKLSARPVLRVRI PNNNFSSNSAIPSEPSSASSTSANGNSMGSSQIMKENKTSRSSKISPLSASASGPLTLQGNNGRMV IKLPN  
 401 ANAPNGSNNGNGSNNNNHYPFGSGSSPLFSATQPYIATPLOPSNIPGGPFOQNTSFLAOROTOQYQOMSFKKQSO TVPLTTTLTGRPPSTFSGPETSNG  
 501 PPTGSLPSKFVHDLMSNSPNVSSI SMFPDWSMGPNSAKPGNTNPNPGTFPPVOTAVNNGNSSNISSTNNTNNNNNNNNNNNNSSNNNSNNGNDNNSNNSNNSY  
 601 YSNNE DAPVNGAAI SEHTTDGDSNNQSNSSSTYDAAATAYNGNTGLTPYINTAQTPLGTFKFFNFSTDISGEKNSSKI

## PSP2

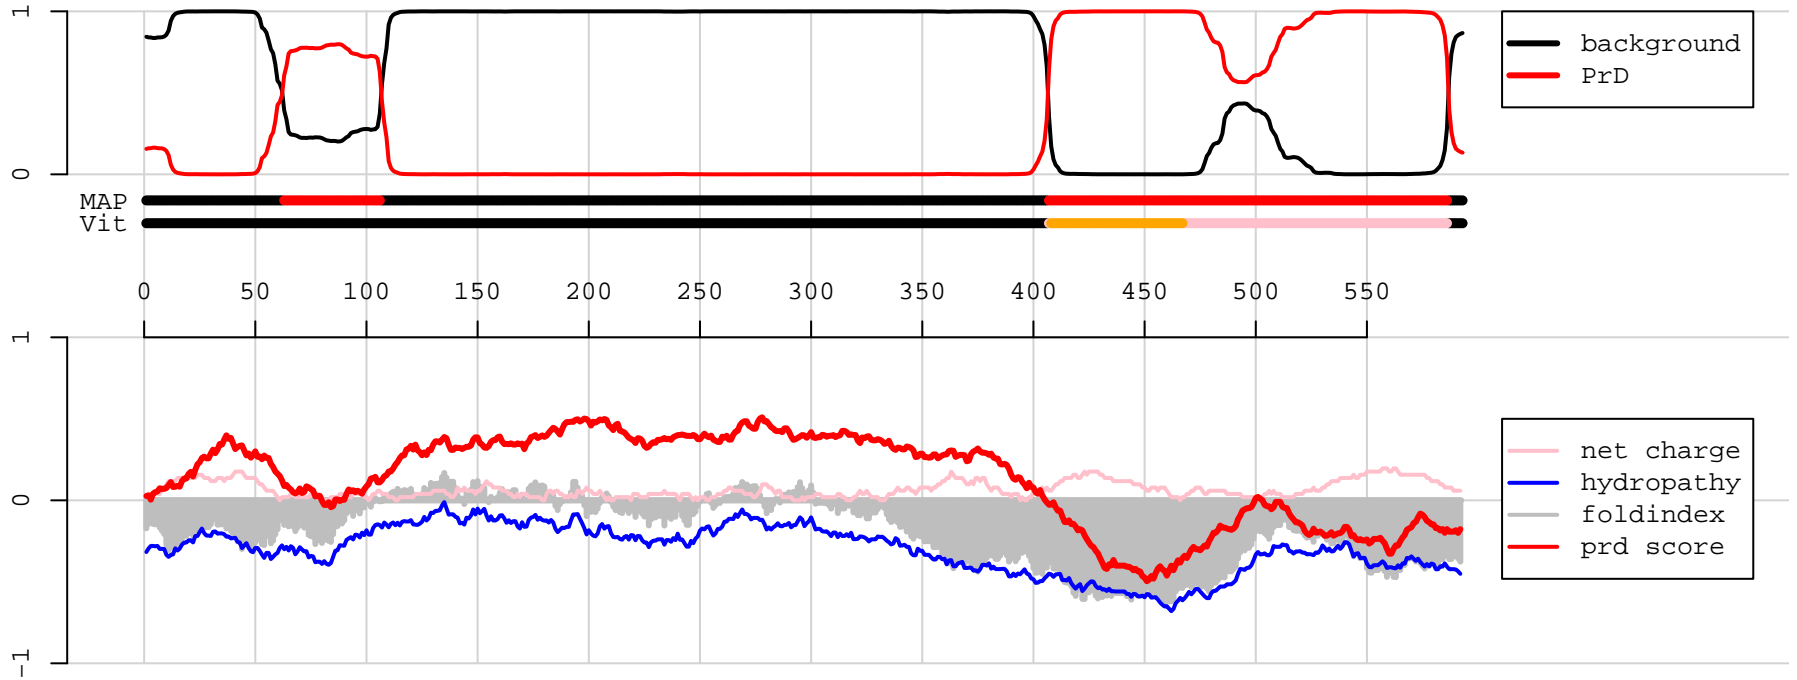

1 MGTNNTSNNNGT~~TKKMSLEEF~~LGN~~DTL~~GESVWDEEDINLDAISNTT~~NIDILKQTKAGEHQRDGHQOHPHG~~GHGPMNRSRFSNAGPFGGSGMGDFANHHHP  
 101 LQHQQGPPYIVKFS~~DLPPRFSNFDIEDLFQAKFTKFIKFLFWEINKNPSIS~~TLKSGSIFDQNF~~KRDSKVA~~FVELYTSRDMDKILNYWTTPLKEIYHITT  
 201 APAEFEDFKDYSTKVKLLTDPKDDAGKPFITKTORSKSNPFGSAKPVDTQSKILDIEEK~~MENLHVEDTTTL~~RASLIPSSDSMATTATGSKITILKKQTPT  
 301 EEESH~~SATPTPKPLSYSEVVERS~~VVN~~ETSKKGTPLSKLD~~SPALELQSKPKSDEFKGGDEQGF~~EKGDDKAQLDVS~~NDKDKGSETD~~VDKQFTFK~~NVEREH  
 401 SMSRTK~~YNGNHNNNNNGNFRG~~SNRYRGGPN~~GS~~SYKGGHNNRGNRGGYRGGSSYNNNNNNNTNDNNNNNNNNSSSNNNNNGSR~~YH~~DRONNEEGLTSDSSLDASGN  
 501 ~~KNDF~~TN~~ST~~SNT~~OOYSIFKPA~~SGFLGOGN~~NDSIR~~NNGRGN~~YNS~~SGM~~NGGSRGRG~~FGRGRGFGRGAYNNR~~GS~~RGG~~RGSS~~GNYSNYNNRRTDMPL

# NUP100

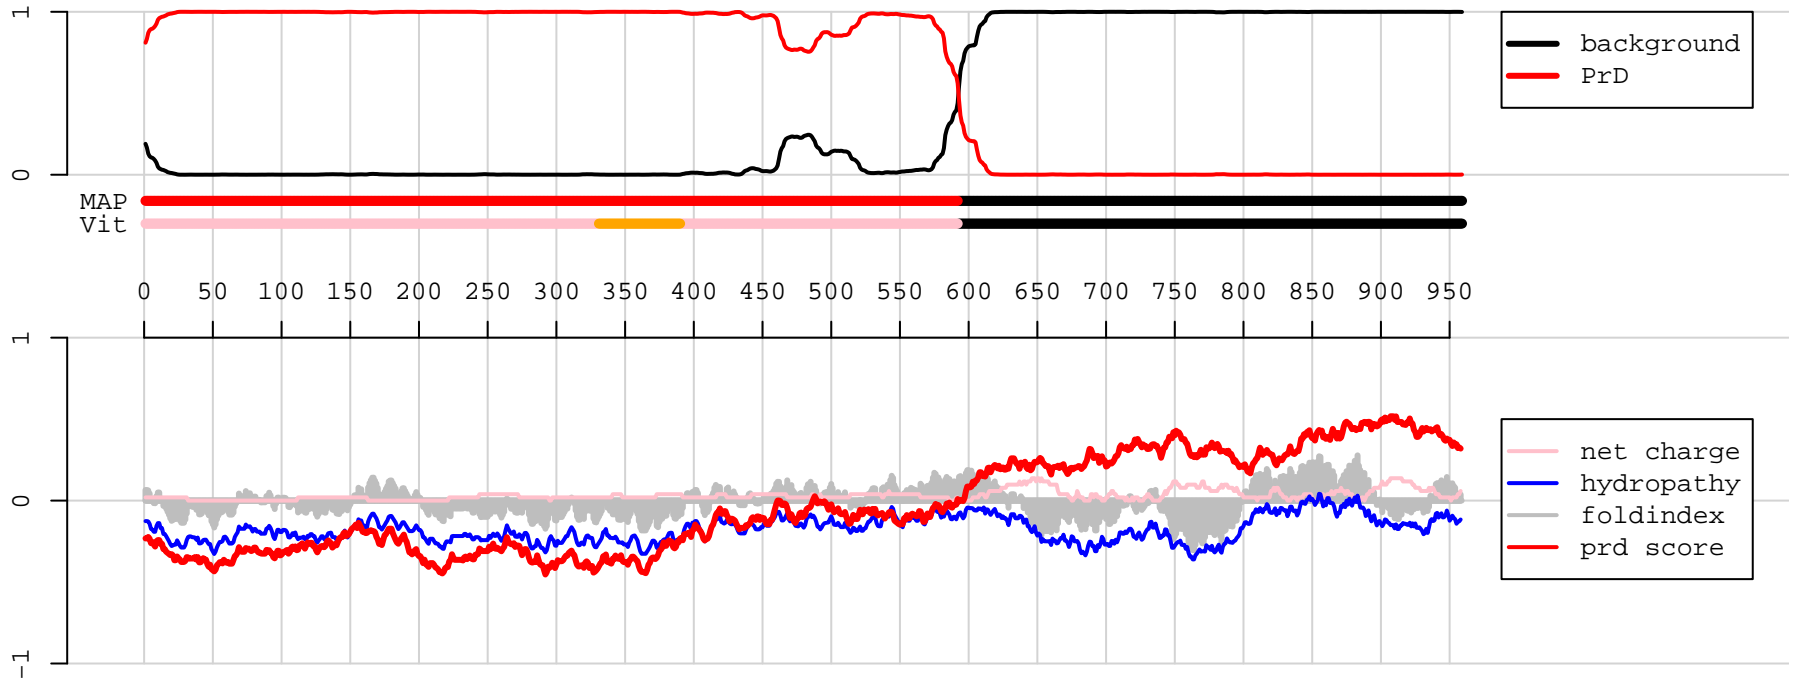

1 MFGNNRPMFGGSNLSFGSNTSSFGGOOSOPNSLFGNSNNNNNSTSNNAOSGFGGFTSAAGSNSNSLFGNNNTONNGAFGOSMGATONSPFGSLNSNAS  
 101 NGNTFGGSSSMGSGGNTNNAFNNSNSTNSPFGFNKPTGGTLFGSONNSAGTSSLFGGOSTSTTGTFGNTGSSFGTGLNGNSIFGAGNNSOSNTT  
 201 GSLFGNOSSAFGTNNOGSLFGOOSONTNNAFGNONOLGGSSFGSKPVGSGSLFGOSNNTLGNTTNNRNLFGOMNSSNOGSSNSGLFGONSMNSSTOG  
 301 VFGONNNOMOINGNNNSLFGKANTFSNSASGGLFGONNOOGSGLFGONSOTSGSSGLFGONNOKOPNTFTOSNTGIGLFGONNOOOSTGLFGAKPA  
 401 GTTGSLFGGNSSTOPNSLFGTTNVPTSNTOOOGNSLFGATKLTNMPFGGNPTANOSGSGNSLFGTKPASTTGSLFGNNTASTTVPSTNGLFGNNANNST  
 501 STTNTGLFGAKPDSOSKPALGGGLFGNSNSNSTIGONKPVFGGTTONTGLFGATGTNSSAVGSTGKLFGONNNTLNVGTONVPPVNNTTONALLGTTAV  
 601 PSLQQAPVTNEQLFSKISIPNSITNPVKATTSKVNADMKRNSSLTSAYRLAPKPLFAPSSNGDAKFQKWGKTLERSDRGSSTSNSITDPESYLSNDLL  
 701 FDPDRRYLKHLVIKNNKLNVINHNDDDEASKVKLVFTFTTESASKDDQASSIAASKLTEKAHSPQTDLKDHDDESTPDPOSKSPNGSTSIPMIENEKISS  
 801 KVPGLLSNDVTFKNNYYISPSIETLGNKSLIELRKINNLVIGHRNYGKVEFLEPVDLLNTPLDTLCGDLVTFGPKSCSIYENCISIKPEKGEGINVRCRV  
 901 TLYSCFPIDKETRKPIKNITHPLLKRSIAKLKENPVYKFEYDPVTGTYSYTIIDHPVLT

# RAT1

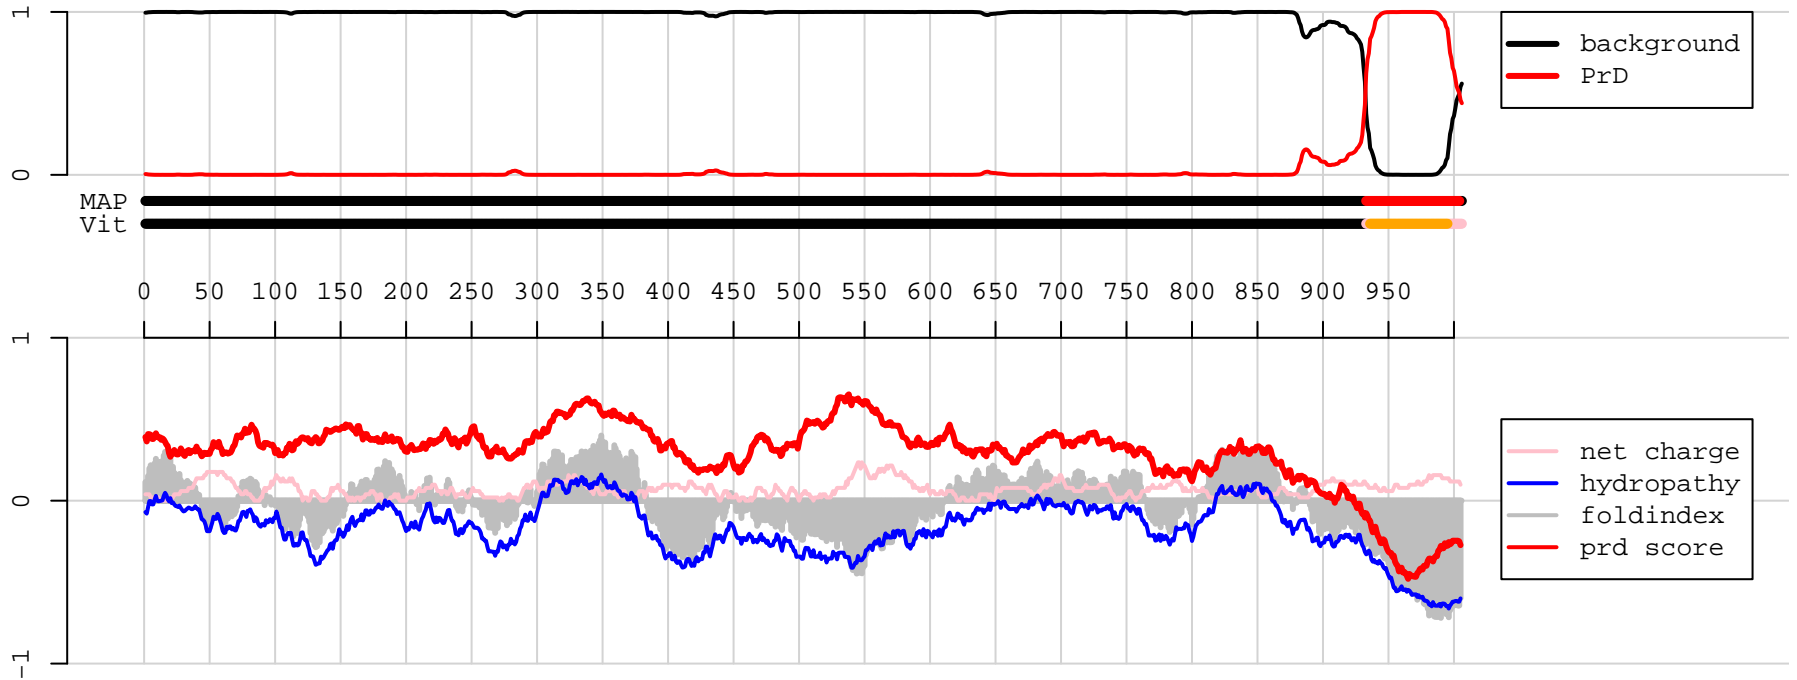

1 MGVPSFFRWLSRKYPKII SPVLEEQQIVDGVILPLDYSASNPNGELDNLYLDMNGIVHPCSHPENKPPPETEDEMELLAVFEYTNRVLNMARPRKVLVMA  
 101 VDGVAPRAKMNOQRARRFRSARDAQIENEAREEIMRQREEVGEIIDDVAVRNKKTWDSNAITPGTPFMDKLAALRYWTFKLATDPGWKNLQVIISDATV  
 201 PGEGEHKIMNFIRSQRADPEYNPNTHCIYGLDADLIFLGLATHEPHFKILREDVFAQDNRKRNNLKDTINMTEEEKQFLQKQNSEQPFLWLHINVLEREY  
 301 LSAELWVPGLPFTFDLERAIDDWVFCFFCGNDFLPHLPCLDVRENSIDILLDIWKVVLPKLKYMTCDGVLNLP SVETLLQHLGSREGDIFKTRHIQEA  
 401 RKKEAFERRKAQKNMSKGQDRHPTVATEOLOMYDTQGNLAKGSWNLTTSDMVRLKKELMLANEGNEEAI AKVKQOSDKNNELMKDISKEEIDDAVSKANK  
 501 TNFNLAEVMKQKI INKKHRLEKDNEEEEIAKDSKKVKTEKAESECDLDAEIKDEIVADVNDRENSETTEVSRDSPVHSTVNVSEGPKNQGVFDTDEFVKLF  
 601 EPGYHERYYTAKFHVTPQDIEQLRKDMVKCYIEGVAWVLMYYYQGCASWNWFYPYHYAPLATDFHGFSHLEIKFEEGTPFLPYEQLMSVLPAAASGHALPK  
 701 IFRSLMSEPDSEIIDFYPEEFPIDMNGKKMSWQGIALLPFIDQDRLLTAVRAQYPLLSDAERARNIRGEPVLLISNKNANYERFSKKLYSKENNNNNVVV  
 801 KFQHFKSGLSGIVSKDVEGFELNGKIVCPIQGGSLPNLSTTLILKMSYRLIPLPSRNKSIILNGFIPSEPVLTAAYDLDSIMYKYNQNYSRRWNFQNDLK  
 901 QNIVPVGPKGITQYKPRRTGGYRAFFYFAELSR NNVOPAHNYGRNSYNSOPGFNNSRYDGGNNNYRONSNYRNNNYSGNRNSGOYSGNSYSRNNKOSRYDN  
 1001 SRANRR

# LSM4

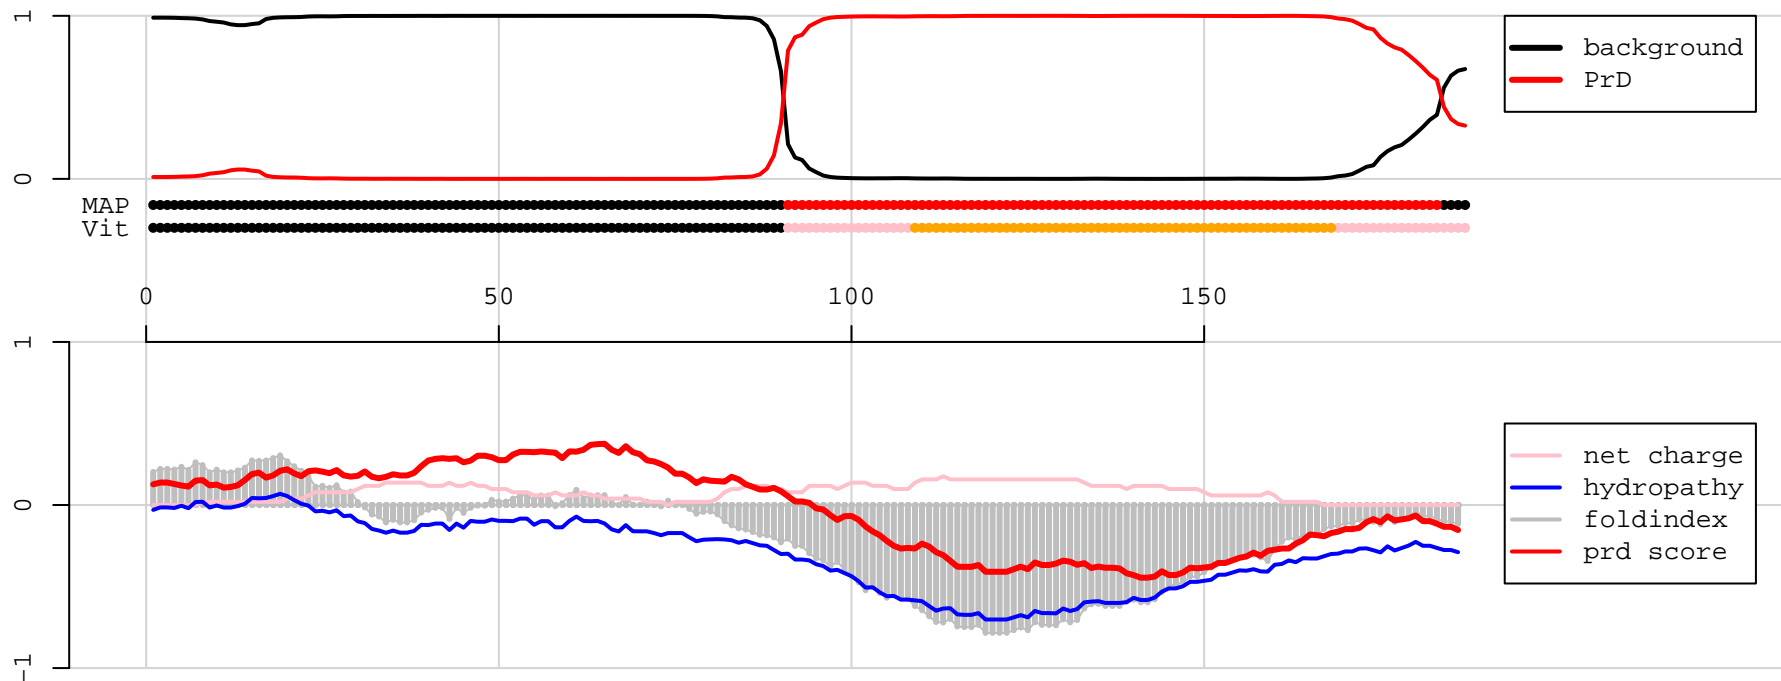

1 MLPLYLLTNAKGQQMQIELKNGEIIQGILTNDNWMNLTLSNVTEYSEESAINSEDNAESSKAVKLNEIYIRGTFIKFIKLQDNIIDKVKOOINSNNNSN  
 101 SNGPGHKRYNNRDSNNNRGNYNRRNNNNNGNSNRRPYSONROYNNSNSNINNSINSINSNNQNMNNGLGGSVOHHFNSSSPKVEF



### NAB3

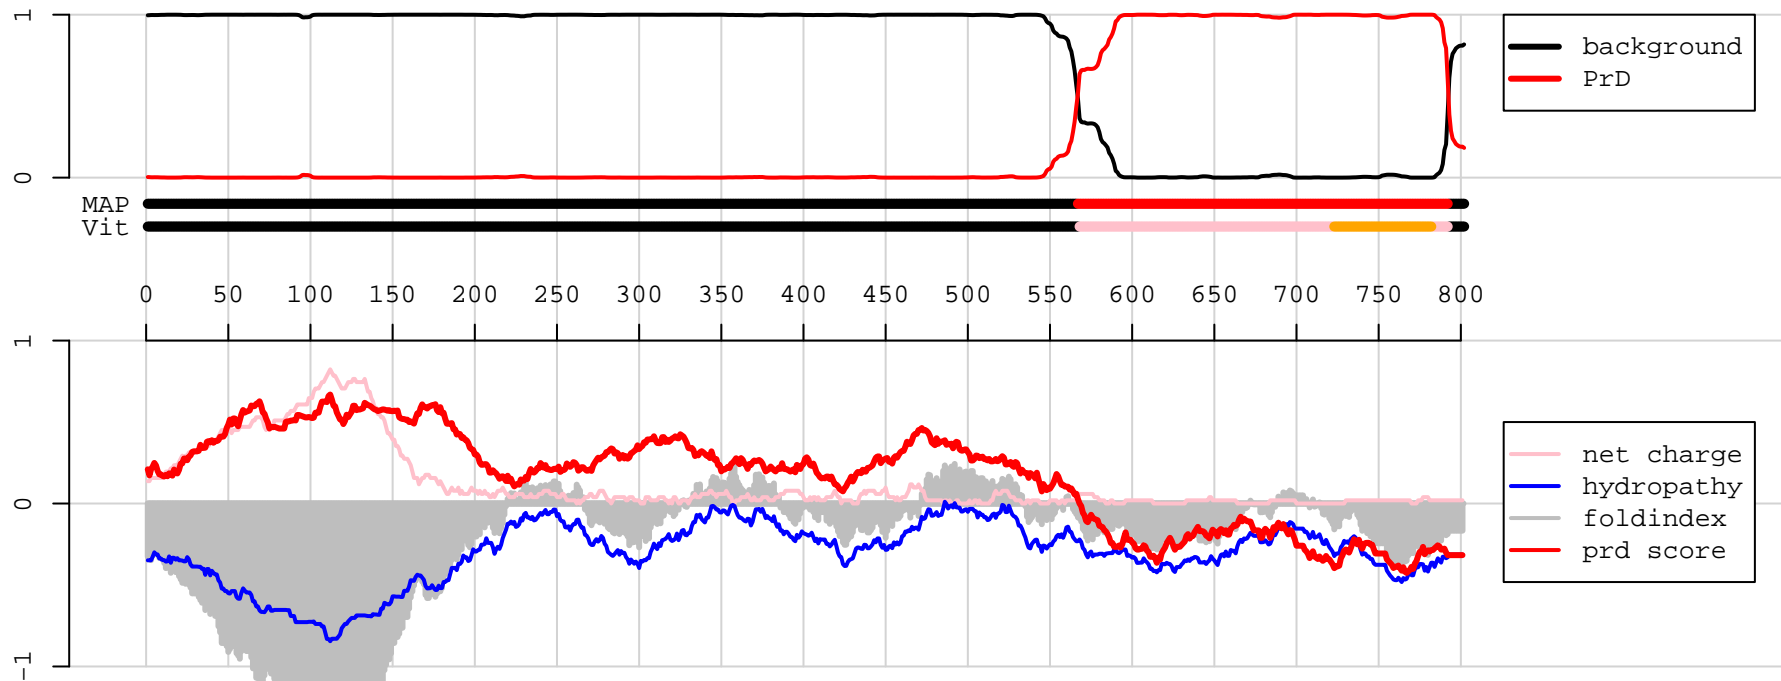

1 MSDENHNSDVQDI PSELSVDSNSNENELMNNSSADDGIEFDAPEEEREAEEREENEEOHELEDVNDEEEEDKEEKGEENGEVINTEEEEEEEHQKGGN  
 101 DDDDDNNEEEEEEDDDDDDDDDDEEEEEEEEEEGNDNSSVGSDSAEDGEDEEDKKDKTKKEVELRRETLEKEQKDVDEAIKKITREENDNTHFP  
 201 TNMENVNYDLLQKVYIMDSNMLNLPQFQHLPQEEKMSAILAMLNSNSDTALSVPPhdstiSTTASASATSGARSNDQRKPLSDAQRMRFRPRADLSK  
 301 PITEEEHDRYAAYLHGENKITEMHNIPPKSRLFIGNLPLKNVSKEDLFRIFSPYGHIMQINIKNAFGFIQFDNPQSVRDAIECESQEMNFGKKLILEVSS  
 401 SNARPQFDHGDHGTNSSSTFISSAKRPFOTESGDMYNDNGAGYKKSRRHTVSCNIFVKRTADRTYAEVFNRFRDGTGLETDMIFLKPRMELGKLINDA  
 501 AYNGVWGVVLVNKT HNVDVQTFYKGSQGETKFDEYISISADDAVAIFNNIKNNRNNRSRPTDYRAMSHOONLYGAPPLVPNGPAVGPPPOTNYYOGYSMP  
 601 PPOOOOOPYGNYGMPPP SHDOGYGSOPPIPMNOSYGRYOTSIPPPPOOIPOGYGRYOAGPPPPOPPSOTPMDOOOLLSAIONLPPNVVSNLLSMAOOO  
 701 OOPHAOOOLVGLIOSMOGOAPOOOOOLGGYSSMNSSSPPPMSTNYNGONISAKPSAPPMSHOPPPPPOOOOOOOOOOOOOPAGNNVOSLLDSLAKL  
 801 OK

# ENT1

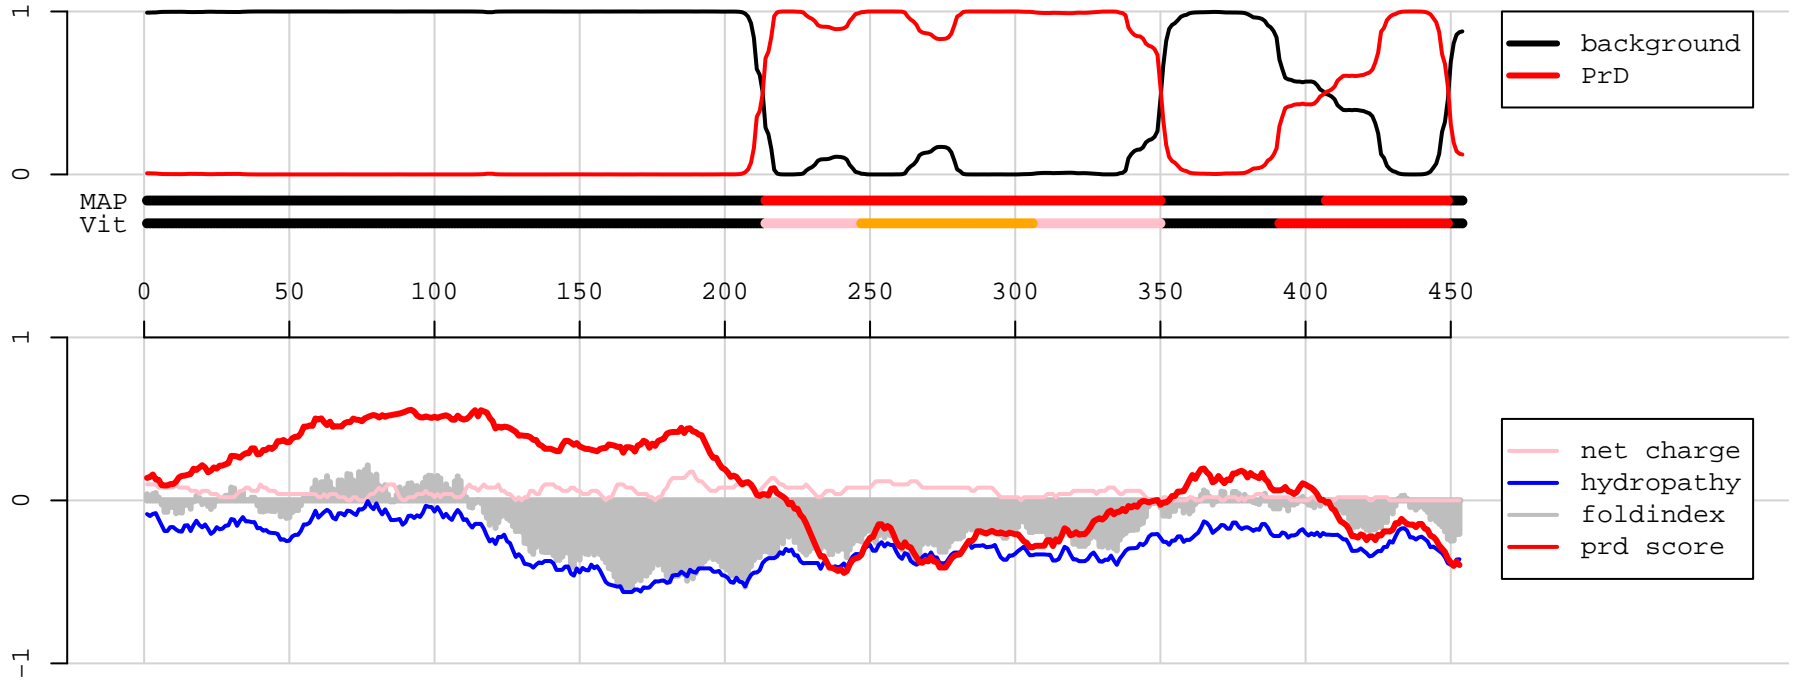

1 MSKQFVRS AKNLVKGYSSTQVLVRNATSNDNHQVSKDSLIELAEKSYDSADFFEIMDMLDKRLNDKGYWRHIAKALTVIDYLRFGSENCVLWCRENLY  
 101 IIKTLKEFRHEDDEGIDOGQIVRVKAKELTALLSDDERLNEERNMNIKGRNRKGRRRRGTGRSDENDDDLQRAISASRLTAEEDERRRKQEDDYETALQL  
 201 SKEEEELKRLQDLORMQQQQGQQQLQOPMYYDIFGNPITPEEYAFQLQQQQQQQQQQQLQOPMYYDVFGNPITPEELAQFOQQQQQLQEQOYLASMQQQQ  
 301 QAMSNNPFAKSEOSSSPKRNOLVAASSPOOLQOQKQOEPLIQNRTGNSMTDKYSKLNELLATGTGIDTFGNVGEARIPAQHTKTGTFINSGTGYRQV  
 401 SDDPNHNPFLNSOYTGLPSTSVVPTQTGYGFGNQSQQQSNNNGSNNRGYTLIDL

# SCD5

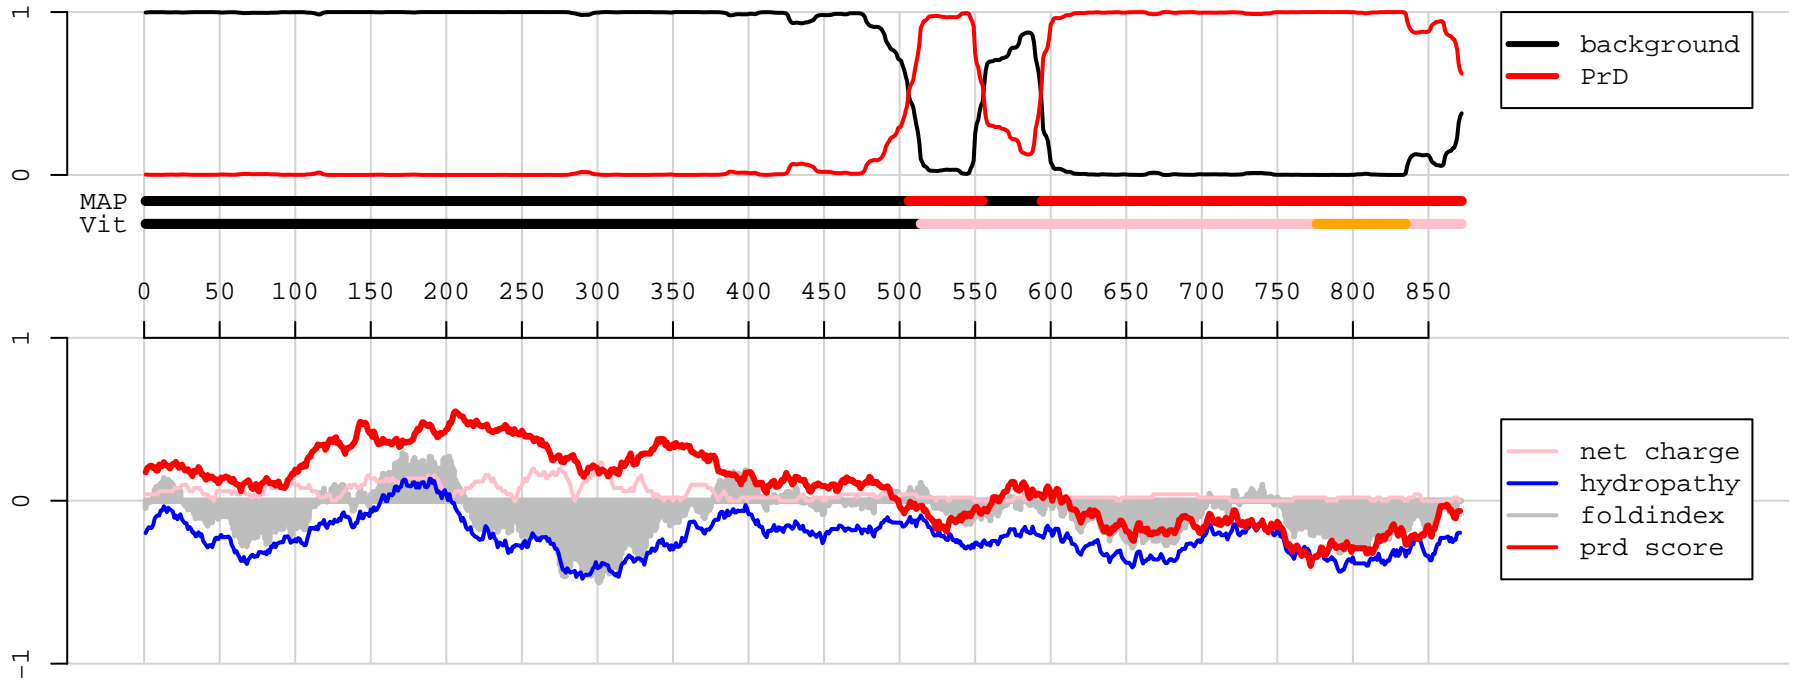

```

1  MSFDWLNVPGLDLSSGDQAEKRPSNGLGPPSVSFDGINTAAPHDSSFWDQGRSHSDTTLSYRNNHSNTAADNATNVSSPQKDNPPNGEVRTLSSGGDVY
101  AESPEDMOVPLSLSONQLTHEEIRTYLRWYHYICLRTHGKLVRLNDVFRFLTNTFNLSQKVKDRIVEIFRSCKNALNIGQFFAVLRLVSRAIYIGILPLRR
201  MILEKAPVPKPRPILSSENHEEVYEEVEDDDSSAKTGDQKVDVDFSFASLLLTGKTTRKRVRRRIKLNLFKSKKRVFSEHITFQDPPNLNQEISSNNSEARK
301  QDPDAEDEDQDSNNDSPLDFTLPMQDQLKRLYKRRKNSGLVSSLPSEQEETEEKVKVLEDMKDSLHFKQIQTVDSASLPISVFLQNGNTLPTSNVNNT
401  TVPQQLPLEPLKPTATGSANHLVREEYNQGLHPSNGAIQTGLQPLKPTATGSANYLMRSHMEQPOSIKPSSTPETVTNSGGLOPLKPTATGSANYLMKQH
501  ISPSVNNPVSSMFOAFTNOSSSPOSTGPAFLNSPNITLPOSNOOOPYOEVNPTOAKIEPSNISPQHTYSNNVRINNGNIVSMPKVEITGAFPPONTLPQ
601  HQQSHLLSPONTIPOHORSOLISPONTFTNONOPILSPOHTYSNNOATMISPONTYTNNOOOPPHLPPPPPPRAOOOOOGAIVPPOHMYSNVOKONNLVPT
701  QPSYTNSPSIOSPNFLSPONAANSYFOSILLSSSPSNPTPSNASTVNGNNANGISSFONTSAAMNNTOSHOTYIOOOOOOOTOORIYGGOLSSOMOOHPG
801  QLHLNNSDIHSOPNKPNYGMLGOOVHOOOOOOOOFPFTADVNRSNSSDILGNLOSLOOVDALOIOYNRRP

```

# YBL081W

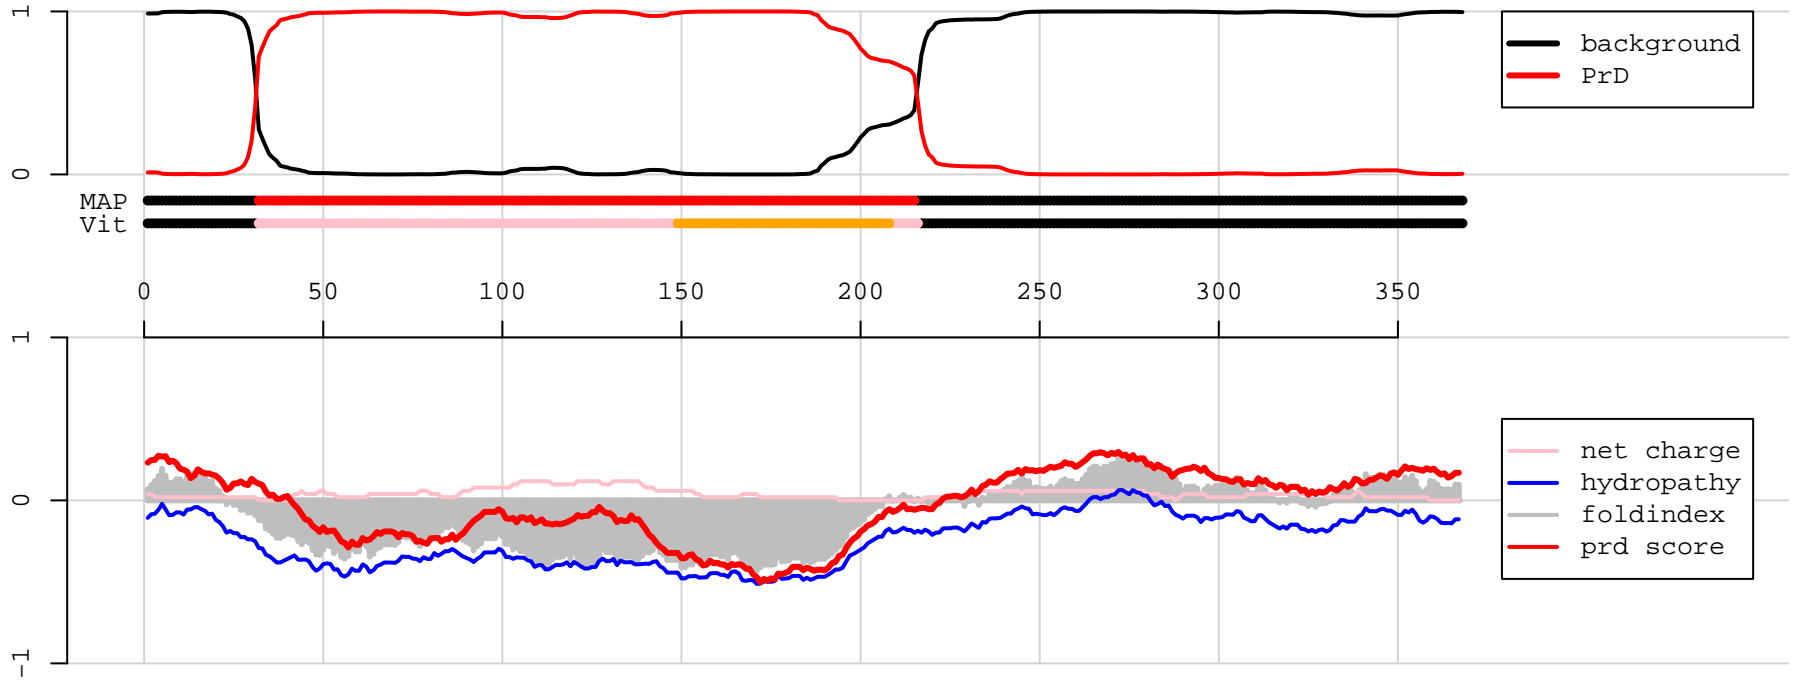

1 MPGQIISIPFLSQNEDMDKYLLEYRSLKLLHOSSNSFOSHNAPSHOSNYHPHYNHMKYNNTGSYYYYNNNNNSSVNPHNOAGLOSINRSTIPSAPYGAYNO  
 101 NRANDVPYMNTOKKHHRFSANNNLNOOKYKOYPOYTSNPMVTAHLKOTYPOLYNSNVNAHHNNNNNSNNNNNNNNNSNNNNNNLYNOTQFSTRYFNSNSSP  
 201 SLTSSTSNSSPYNOSTFEYILPSTSAASTNLSSSSNNSMHTNPTTATSTSADLINDLPVGPTSSSLISDLHSPPTVSFLPASQTLLMSSTTSSSIGTN  
 301 INPPQHSPSPSQREDFSTAPVNMSSSASLLMNDSSLGWGSNHMNVSSSSQPASSRPFGIWNTDMSVWS



# PUB1

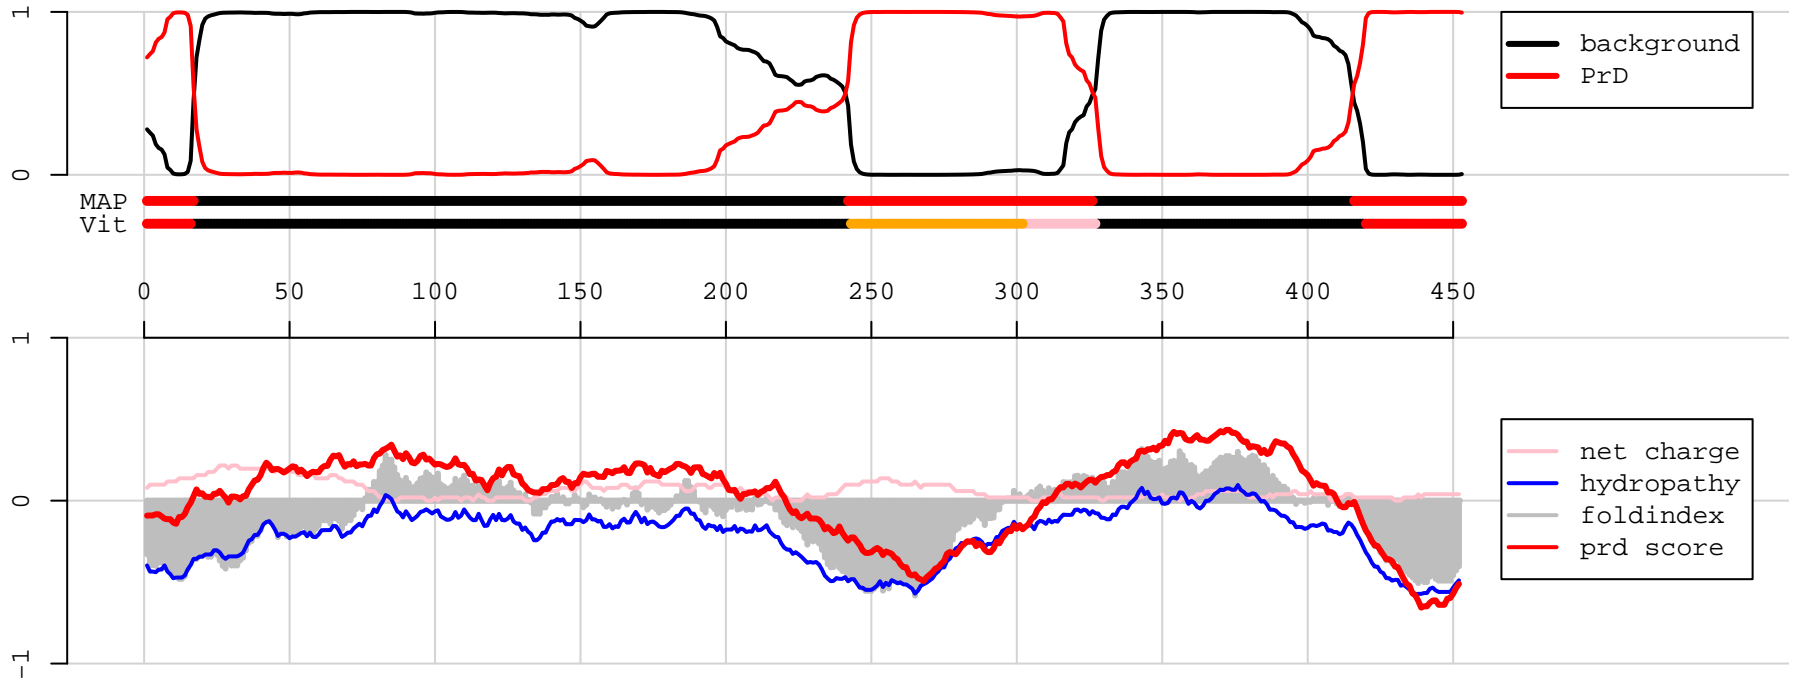

1 MSENNEEQHQOQOQOQOQPVAVETPSAVEAPASADPSSEQSVAVEGNSEAEDNOGENDPSVVPANAITGGRETSDRVLYVGNLDKAITEDILKQYFQVGGP  
 101 IANIKIMIDKNNKNVNYAFVEYHQSHDANIALQTLNGKQIENNIVKINWAFQSQSSDDTFNLFVGD LNVNVDDETLR NAFKDFPSYLSGHVMWDMQTG  
 201 SSRGYGFVSFTSQDDAQNAMDSMOGODLNGRPLRINWAAKRDNNNNNNNYOQRRNYGNRRGGFRROYNSNNNNNNMNMGMNNNNNNMNNNSRGMPPSSMGMP  
 301 IGAMPLPSOGQPQSQQTIGLPPQVNPQAVDHIIRSAPPRVTTAYIGNIPHFATEADLIPLFQNF GFILDFKHYPEKGCCFIKYDTHEQAAVCIVALANFP  
 401 FQGRNLRTGWGKERSNFMPQOQOQGGOPLIMNDQOQPVMSEQOQOQOQOQOQOQOQ

# HRP1

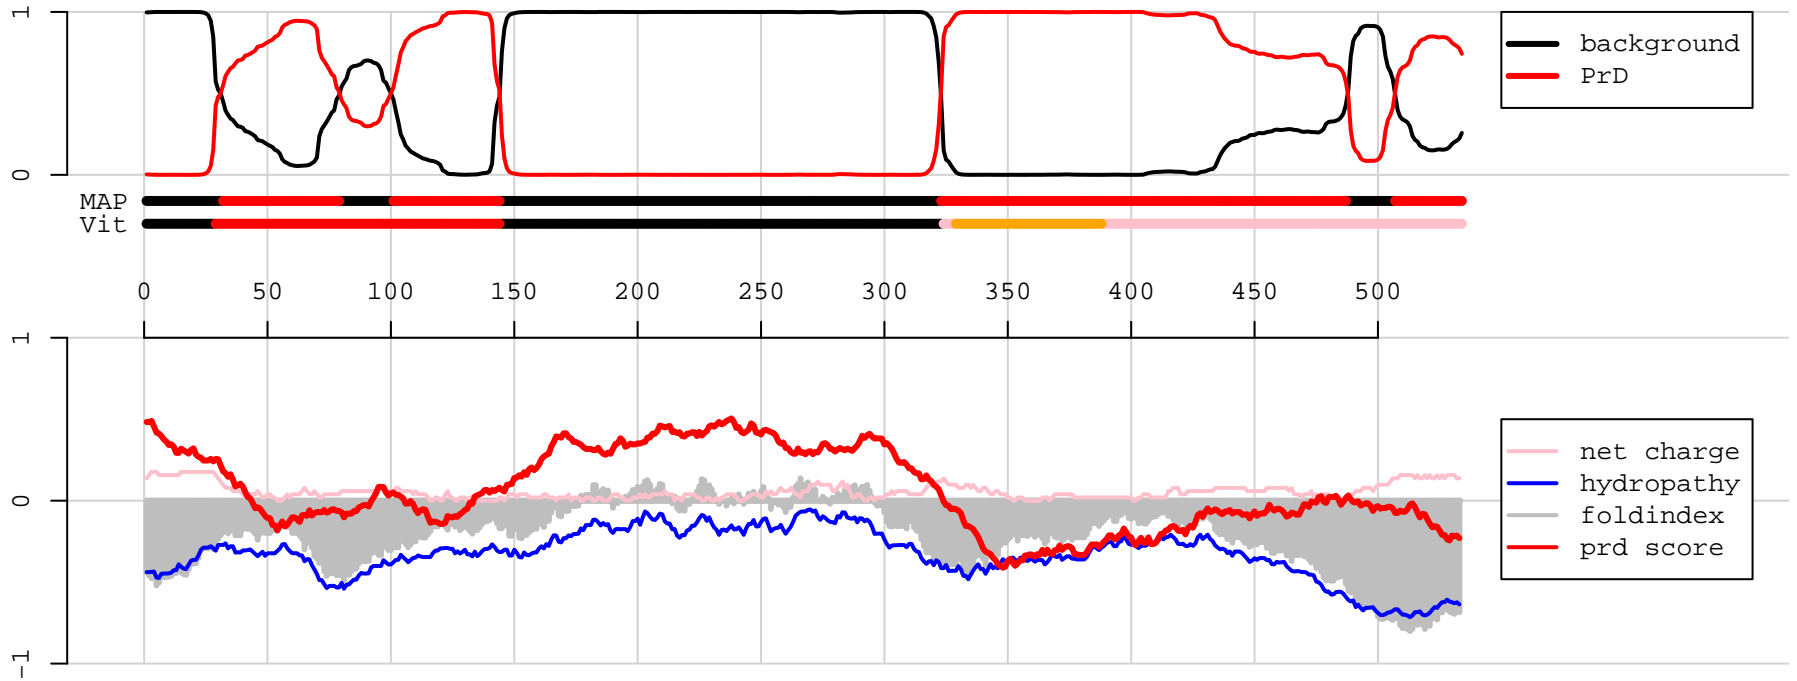

1 MSSDEEDFNDIYGDDKPTTTEEVKKEEEONKAGSGTSQLDQLAALQALSSSLNKLNNPNSNNSSSNNSNODTSSSKODGTANDKEGSNEDTKNEKKQESA  
 101 TSANANANASSAGPSGLPWEQLQOTMSQFQOPSSOSPPOOQVOTKEERSKADLSKESCKMFIGGLNWDTTEDNLREYFGKYGTVTDLKIMKDPATGRSR  
 201 GFGFLSFEKPSVDEVVKTQHILDGKVIDPKRAIPRDEQDKTGKIFVGGIGPDVRPKFEFEFFSQWGTIIDAQLMLDKDTGQSRGFGFVYDSADAVDRV  
 301 CQNKFIDFKDRKIEIKRAEPRHMOKSSNNGGNNGGNNMNRGGNFGNOGDFNOMYONPMMGGYNPMMNPOAMTDYYOKMOEYYOQOKOTGMDYTOMYO  
 401 QOMQOMAMMMPGFAMPNAMLNOPOODSNATOGSPAPSDSDNNKSNVOTIGNTSNTDSGSPPLNLPNGPKGPSOYNDDHNSGYGYNRDRGDRDRNDRD  
 501 RDYNHRSGGNHRRNRRGGRGGYNRRRNNGYHPYNR

# YNL208W

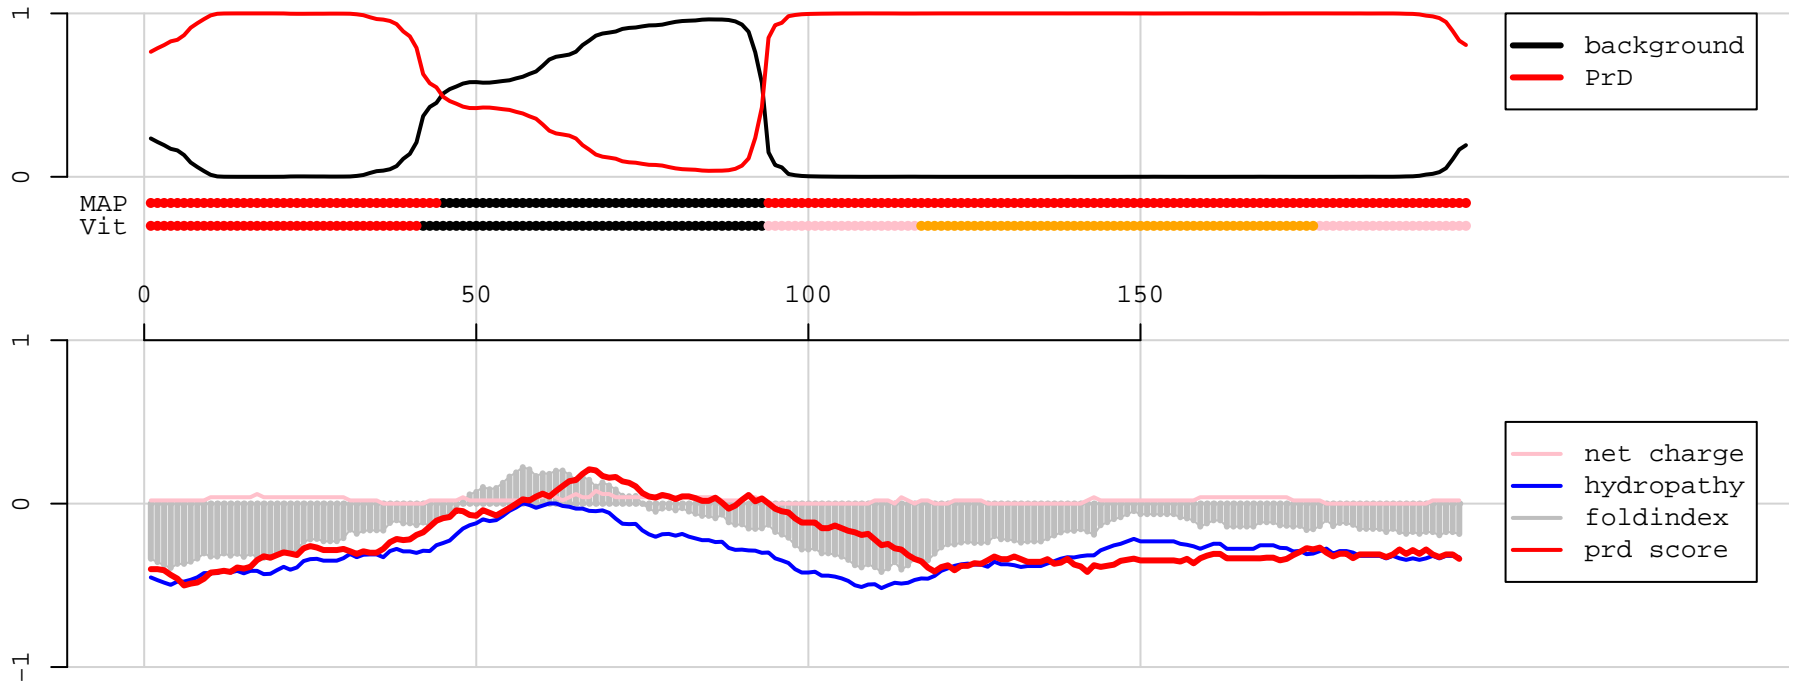

1 MSANEFYSSGOOGOYNOONNOERTGAPNNGOYGADNGNPNGERGLFSTIVGGSAGAYAGSKVSNHSLKLSGVLGAIGGAFLANKISDERKEHKOOEYOYGN  
 101 SNFGGAPOGGHNNHHRQDNNNNNGGFGGGPGGGOGFGROGPOGFGGGPPOEFGGGPGGOGFGGPNPOEFGGGPGGOGFGGPNPOEFGGGOGROGFNGGSRW



## SOK2

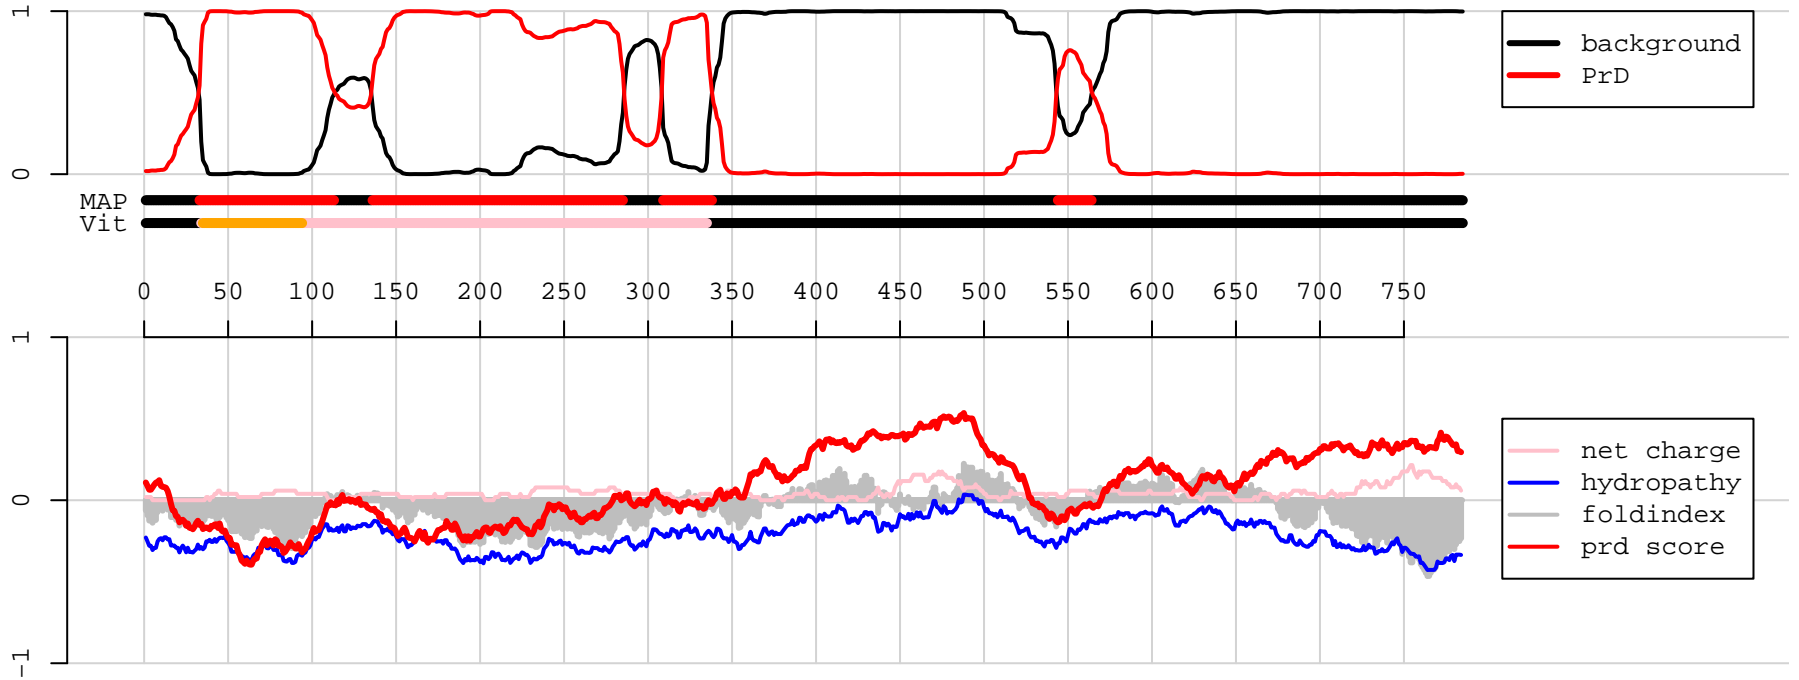

```

1  MPIGNPINTNDIKSNRMROESNMSAVSNSESTIGOST00000000YLGOSVOPLMPVSYOYVVPEOWPYPOYYOPOPOSOS000LOSOPOMYOVOESFOSS
101  GSDSNASNPPSTSVGVPSNATATALPNGSAITTKKSNNSTNISNNVPYYYYFPOMOAOSMAYSYP0AYYYYYPANGDGTNGATPSVTSNOVONPNLEKT
201  YSTFE0000H0000LOAOTYPAOPPKIGNAFSKFSKSGPPSDSSSGSMSPNRNRTSRNSNSISSLAOOPPMSNYPOPSTYQYPGFHKTSSIPNSHSPIP
301  PRSLTTPTOGPTSONGPLSYNLPOVGLLPP0000VSPLYDGNSITPPVKPSTDQETYLTANRHGVSDQYDSMAKTMNSFQTTTIRHPMPLIATTNATG
401  SNTSGTSASIIIRPRVTTTMMWEDEKTLCYQVEANGISVVRADNDMVNGTKLLNVTKMTRGRRDGILKAEKIRHVVKIGSMHLKGVWIPFERALAI AQREK
501  IADYLYPLFIRDIQSVLKQNNPSNDSSSSSSSTGIKSI SPRTYYQPINNYONPNGPSNISA AOLTYSSMNLNKKIIPNNSIPAVSTIAAGEKPLKKCTMP
601  NSNQLEGHTITNLQTLSATMPMKQQLMGNIASPLSYPRNATMNSASTLGITPADSKPLTPSPTTTNTNQSSSESNVGSIHGTITLPRVESESASHKWSKE
701  ADSGNTVPDNQTLKEPRSSQLPISALSTSTDDKIKTSTSDSATQPNPSEAEVKESESSKSQVDGAGDVSNEEIAADDTKKQEK
  
```

# YPL184C

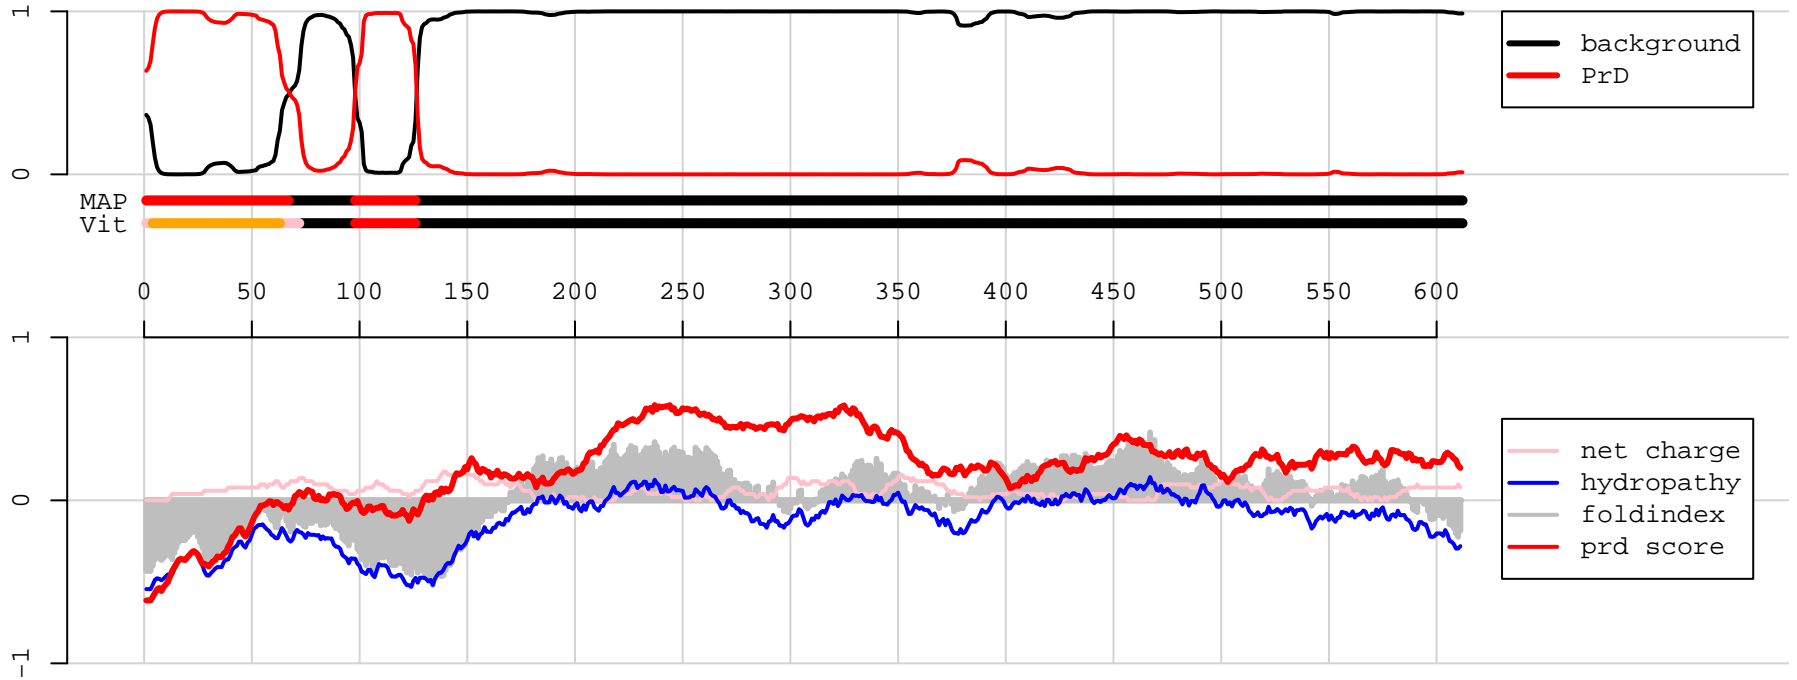

1 MVVSYNNNNNNNNNNNNNNNNNNI SNNNNNNNNMFPPFPSSDDFAMYQOSSSSG PYOETYASGPONFGDAVYPMNGN F TLLP SDF TREP ND SFF YEND GIF DY QR  
 101 I Q O O P T O F O T K O R N D S O O R F S O E Q N F E I D N E V V H N N N R Y E E R S S N E V S P F D D E N P N V L S D G M S P T I M A T A T A V T N A N A P L P V N A Q A N N P L N F T S A P S  
 201 R T V Y L G N V P P N L S V K E L L D H V R S G V V E D V K I I P E K M C A F V S F I D E S A L L F H S D A I L K R L N I G D R D I K I G W G K P T R I D P I V A A R I S T D G A T R N V I G R M T  
 301 I E G E E S H L S E E Q L R V D L E E Y G E I D C I K I I K E G I A F I H F A S I L N A I K V V T N L P I R N P Y Q N K R I F Y G K D R C A F I T K T Q H N A A Q F L G V Q P G M E H M I E F S D  
 401 R E F I S N A L L Q S A A A A I A T S A G G P N N L G N R T V Y L G S L P K D V K I E E I C N A V R G G L L Q S I K L L N D R Y V C F V T F I D P T A A A Q F Y A M S S L Y G F T V Q K R C K V G  
 501 W G K H S G P L P N A L A V S N G A S R N V Y V G N I D F V G D S L R D E R V F T E S N L R H I F Q Y G E V E Q I N F L P E K N C C F I N Y T N I S N A I L A L D K I K S N P Y F K D L K I N F G  
 601 K D R C G N V P H Q S R

## POP2

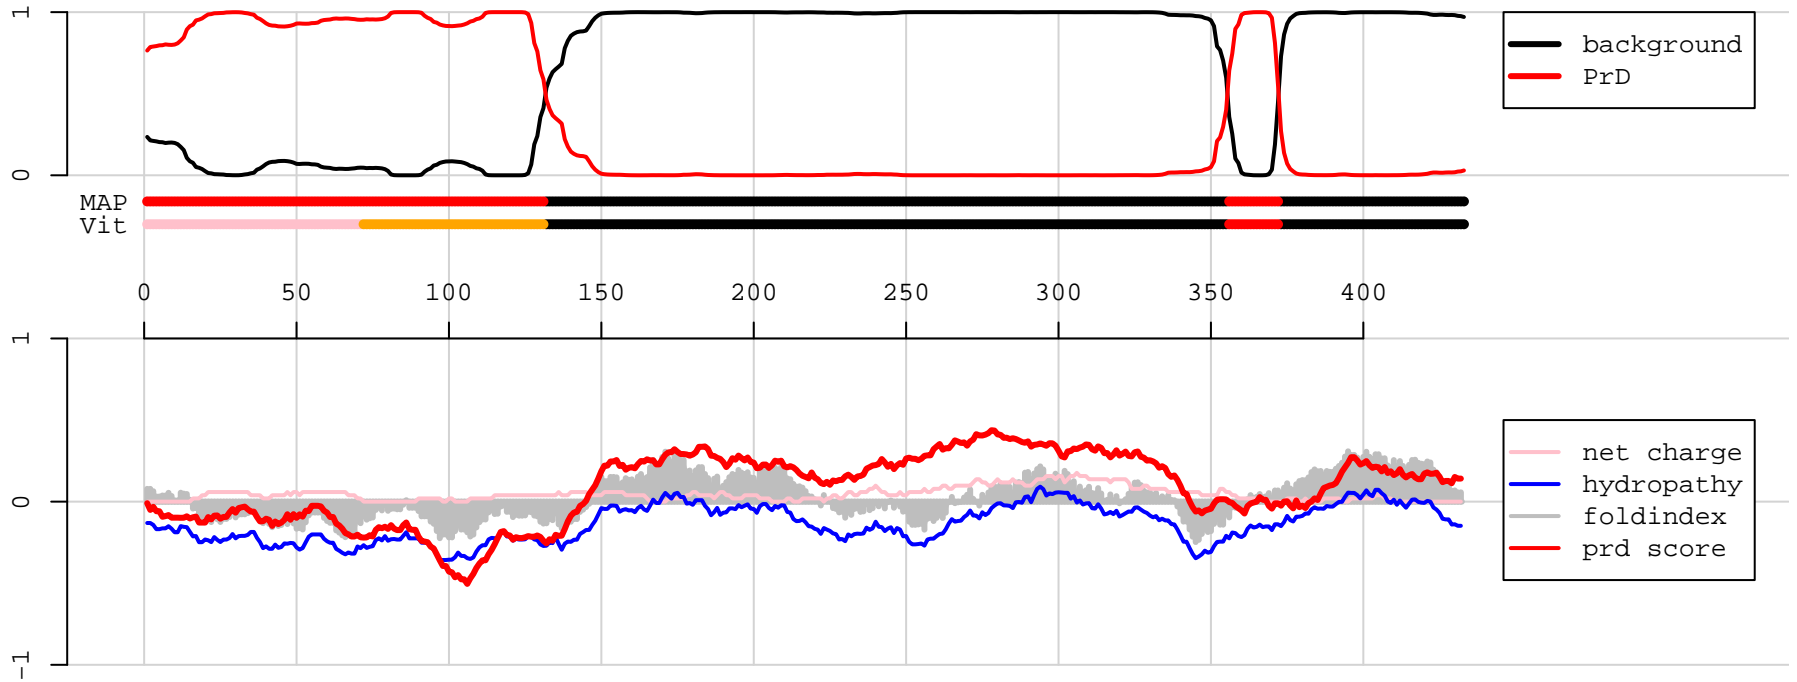

1 MOSMNVOPRVLAVGGEOFFSOROASEOHOOONMGPOVYSPKVNRRARMFPOGMPVNTINGSVNOEMNNAYLLKOKNEPLLTOOOOOOOOOOOPFNIGTPVS  
 101 VASLPPGLNVLOOOOOOOOOOOOOOOOOOGVGLNRPLASQLPKHLTNQSMPPIFLPPPNYLFVRDVWKSNLVSEFAVIRQLVSQYNHVSISTEFVGTLARPIG  
 201 TFRSKVDYHYQTMRANVDFLNPIQLGLSLSDANGNKPDPNGPSTWQFNFEFDPKKEIMSTESLELLRKSGINF EKHENLGIDVF EFSQLLMD SGLMDDSV  
 301 TWITYHAAYDLGFLINILMNDSMPNNKEDFEWVWHQYMPNFYDLNLVYKIIQEFKNPQLQSSQQQQQQQYSLTTLADELGLPRFSIFTTTGGQSLMLL  
 401 SFCQLSKLSMHKFPNGTDFAKYQGVIYGIDGQ

# PIN3

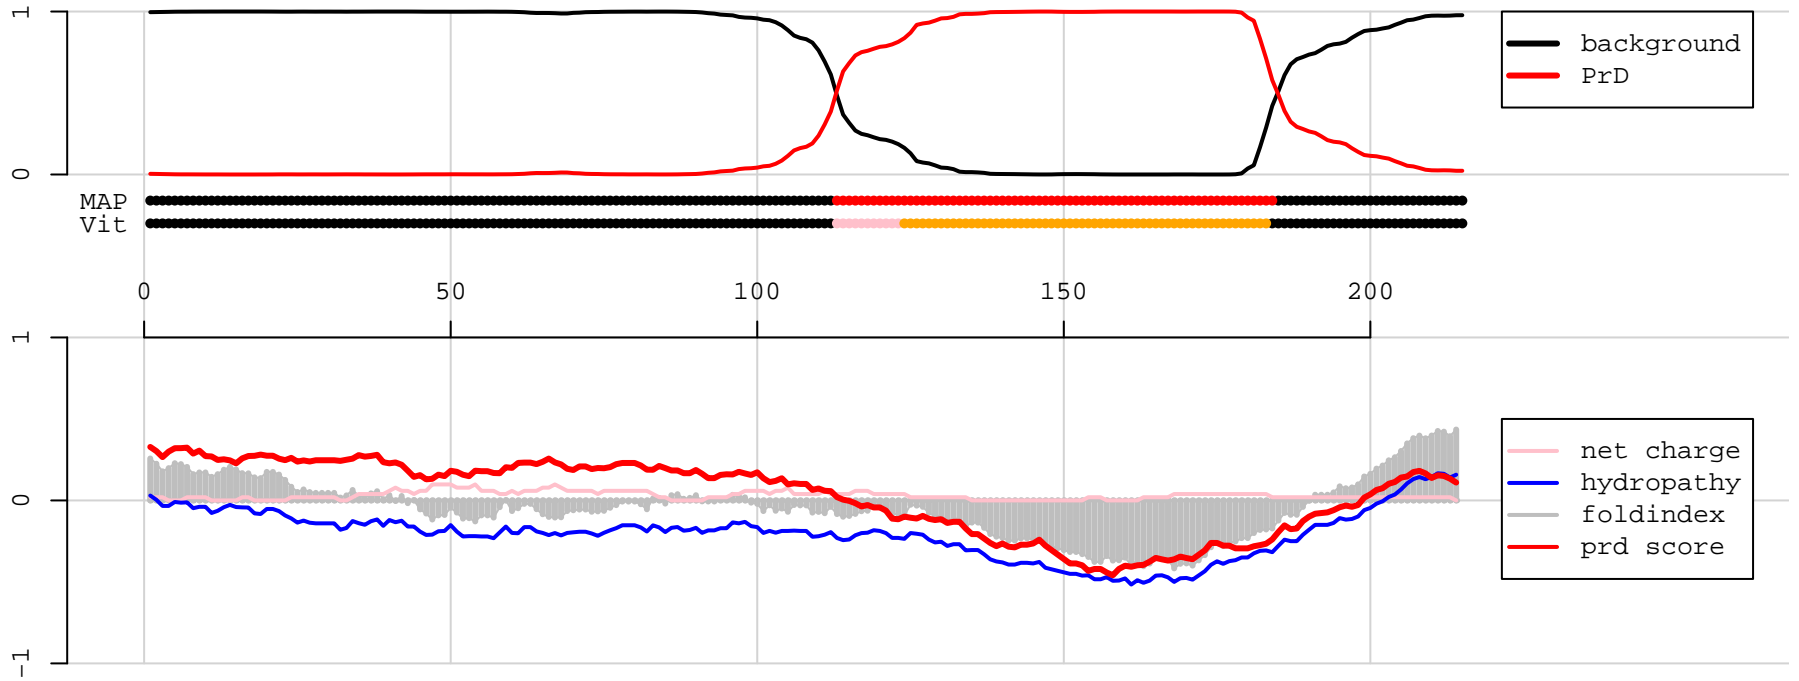

1 MSASLINRSLTNIRTELDLFLKGSNVI SNDVYDQINKSLPAKWDPANAPRNASPASLEYVEALYQFDPOQDGLGLKPGDKVQLLEKLSPEWYKGCNGRT  
 101 GIFPANYVKPAFSGSNGPSNLPPPOYKAOELOOIPTONSAASSYOOOPFPPPSTNYYOOPOOPOOAPPPOOOOOOOOHOSSHSHLKSFGSKLGNAAI F  
 201 GAGASIGSDIVNNIF

# MOT3

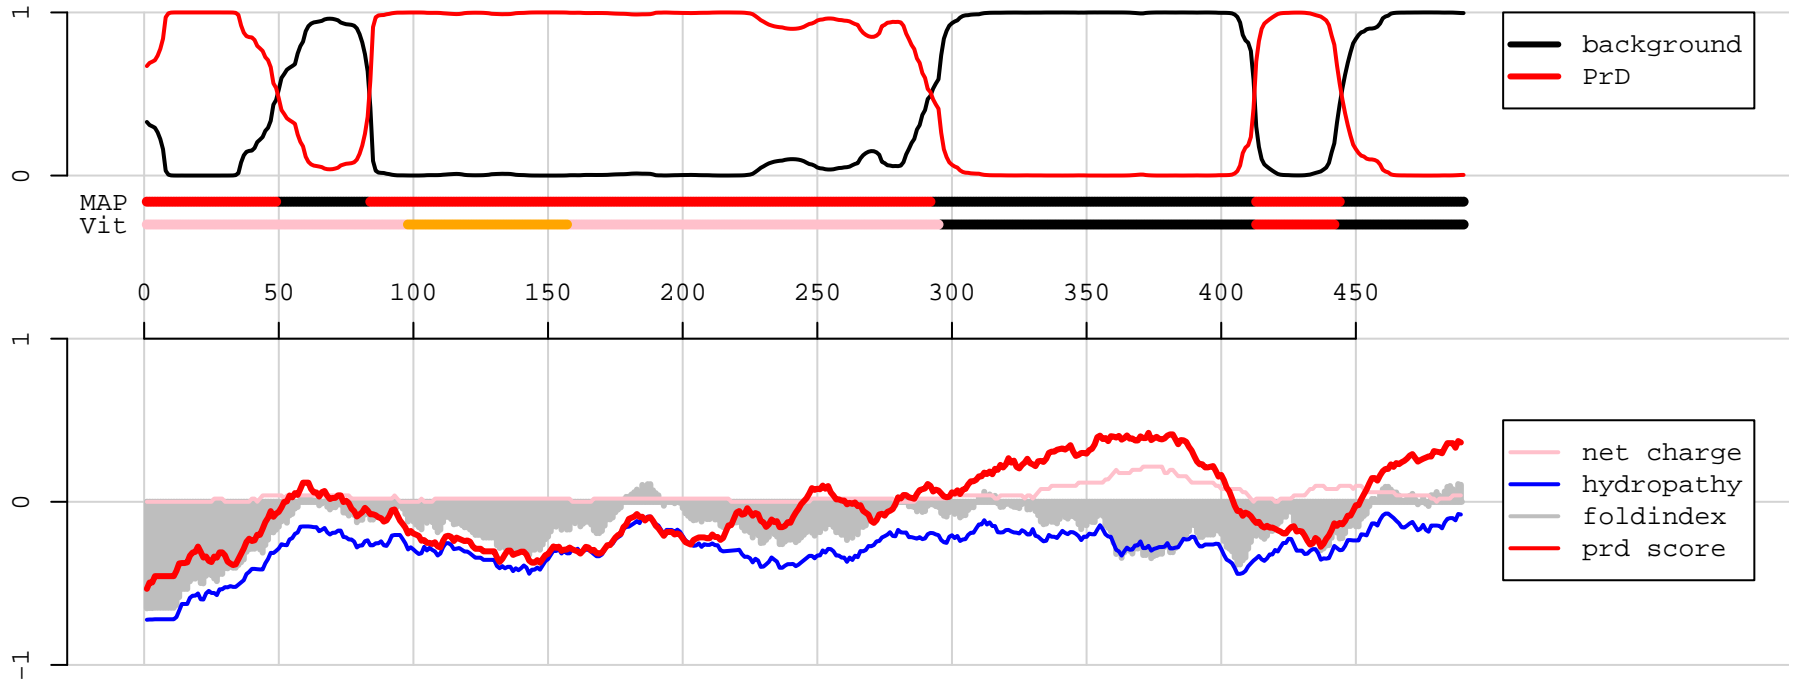

1 MNADHHL00000ROOH0000H0000H0H0H0000HTTLLONVSNNTNNIGSDSLASQPFNTTTVSSNKDDVMVNSGARELPMPLHOOOYIYPYYOYTSNNS  
 101 NNNNVTAGNNMSASPIVHNNSNNSNNSNISASDYTVANNSTSNNNNNNNNNNNNNNNNNIHPNOFTAANMNSNAAAAAYSFPTANMPIPOODOOYMFNPA  
 201 SYISHYYSAVNSNNNGNNAANNGSNNSSHSAPAPAGPPHHHHHHSNTHNNLNNGGAVNTNNAPOHHPTLITDOFOFOLQNPSPNLNLNINPAQPLHLP  
 301 PGWKINTMPQPRPTTAPNHPPAPVPSSNPVASNLVPAPSSDHKYIHQCQFCEKSFKRKSWLKRHLLSHSQQRHFLCPWCLSRQKRKDNLLQHMCLKHTNY  
 401 LLDELKKNNIIFNYNNSSSNNNNDNNNNNNSNSASGGGAGAAAAAATAPENEDGNGYDTNIKTLLINDGVLNKDDVKRVLNNLIVSHNK

# AKL1

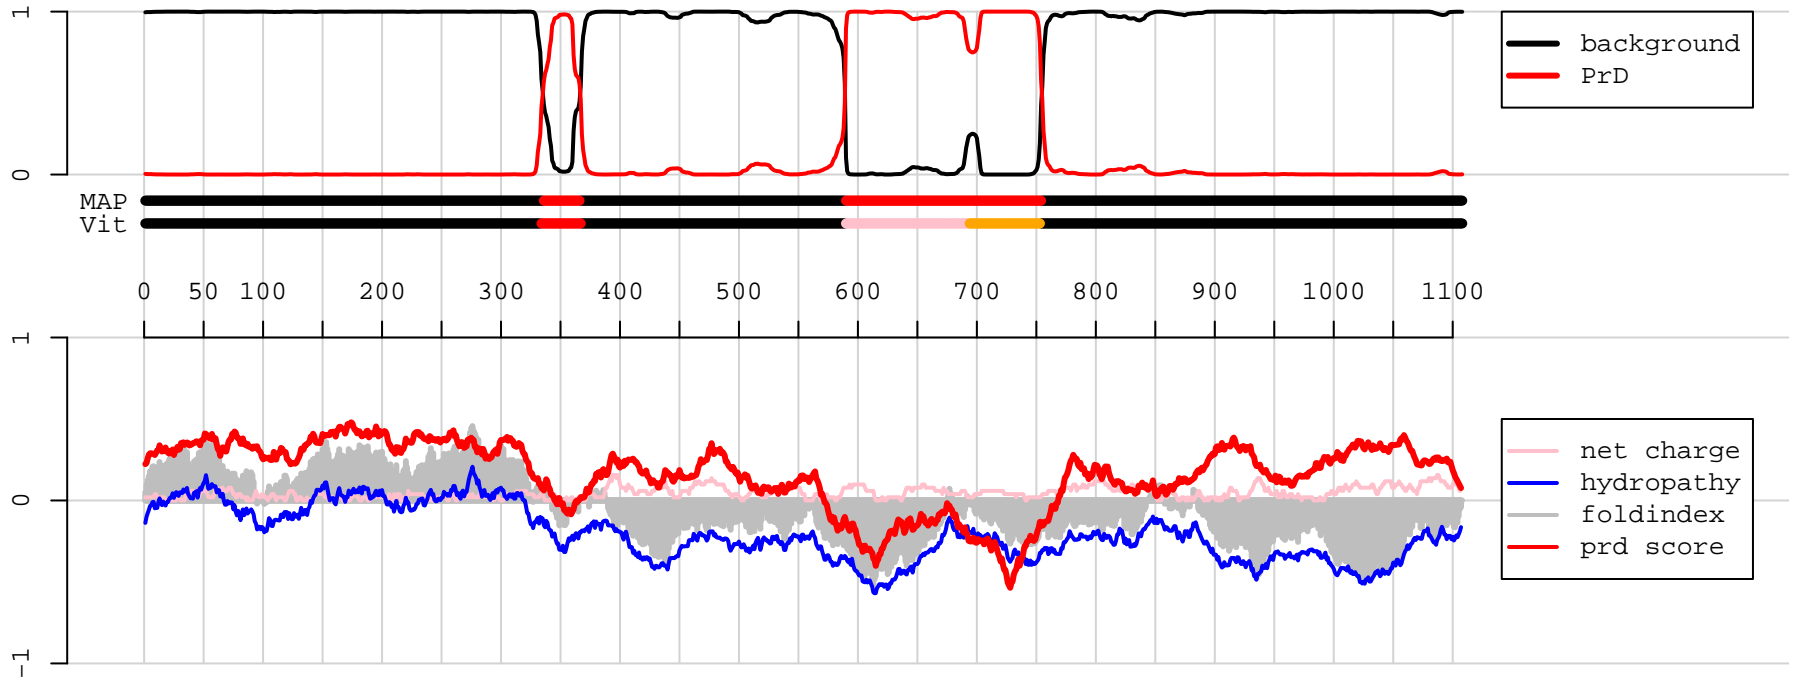

```

1  MSITNGTSRSVSAMGHPAVERYTPGHIVCVGTHKVEVVNYLAEGGFAQIYVVKFLEYLNEFDNTASVPLKIGDVA CLRVLVQDENGLNEMRNEVEVMKK
101 LKGAPNIVQYFDSNASRRRDGVQGFVLLLMELCPNKSLLDYMNQRLSTKLTEAEIVKIMYDVALSISQMHYLPVSLIHRDIKIENVLVDKNNFKLADF
201 GSTSTCFPIVTTHQDIALLTQNIYVHTTPQYRSPEMIDLRYCLPINEKSDI WALGVFLYKLLFFTTT PFEMTGQFAILH SKYEFVVKYSSKLINLIIIML
301 AENPNLRPNIQVLYHLCEILNVEVPIEDKYAEGAYNFSKYTQFONKLNVOLOMYOLOQKKIMONNKLSDSEENLLNDMFLSSFEISSKLPMNASDGHA
401 AVSRIPSONVGOELEEEKESQSDQKSTLSEDKSSRTTSNANSSGTANNPQEINTIQSPGIEDKSI FENKTPGELYPPSVSELDTYLDKELVKQSSDPTI
501 SEQSPRLNTQSLPQOKSTSSYSSGGRSMKSTSYGAATIGSDEALANEKTAGINKMKQHKSNPNFPKMNVA YHSTNELSNDASNFFLEE OOGORYOQAQ
601 NOTGTQGNFFPDES OYOSRVEO O O O O O DOPKGPANYSORNFYTGDRDRSNKPMOLG GTIAGDSGNRRVNFONISONYATNSOSGYLPSONSPAIPMVRPVI
701 SMN O O O A O O I O A O O L O A O O M O A K O O M O A K O O M O V O O O L O V O O O M O I O N A N N N G T Y V S D R T N H T T E D M R N A O G G E P P I L A G N S A N E P M H S S S K N E A L L I E L
801 SPLKEDAGKQSFQDTNEPQTGGIEDAGGSGTIKGSNNNRNGVLNLSLNEMDLSRDDTGA AVSSFS SSSSSSASIQQAKLSGRKGS SKRNNYSTDELGDSMV
901 SSESIDIDLDDARRGKTAERRPLHNERGHKDAQRSSDASKSNQFKSKDFSSVSTRQPROSLDLNFQEVNLS SPTLTQEHNRKNDS PAPNSHHSYRVSPHA
1001 STAITENKRHSTGHELSTRSNGKHETHRTGSKQRHDLERYRHSKDKDSNSSITITSTSTPSEM RKS FARARQSLDLERVRREAMASSASSSGGSNGKRRSF
1101 FSVFRSEK
  
```

# PUF4

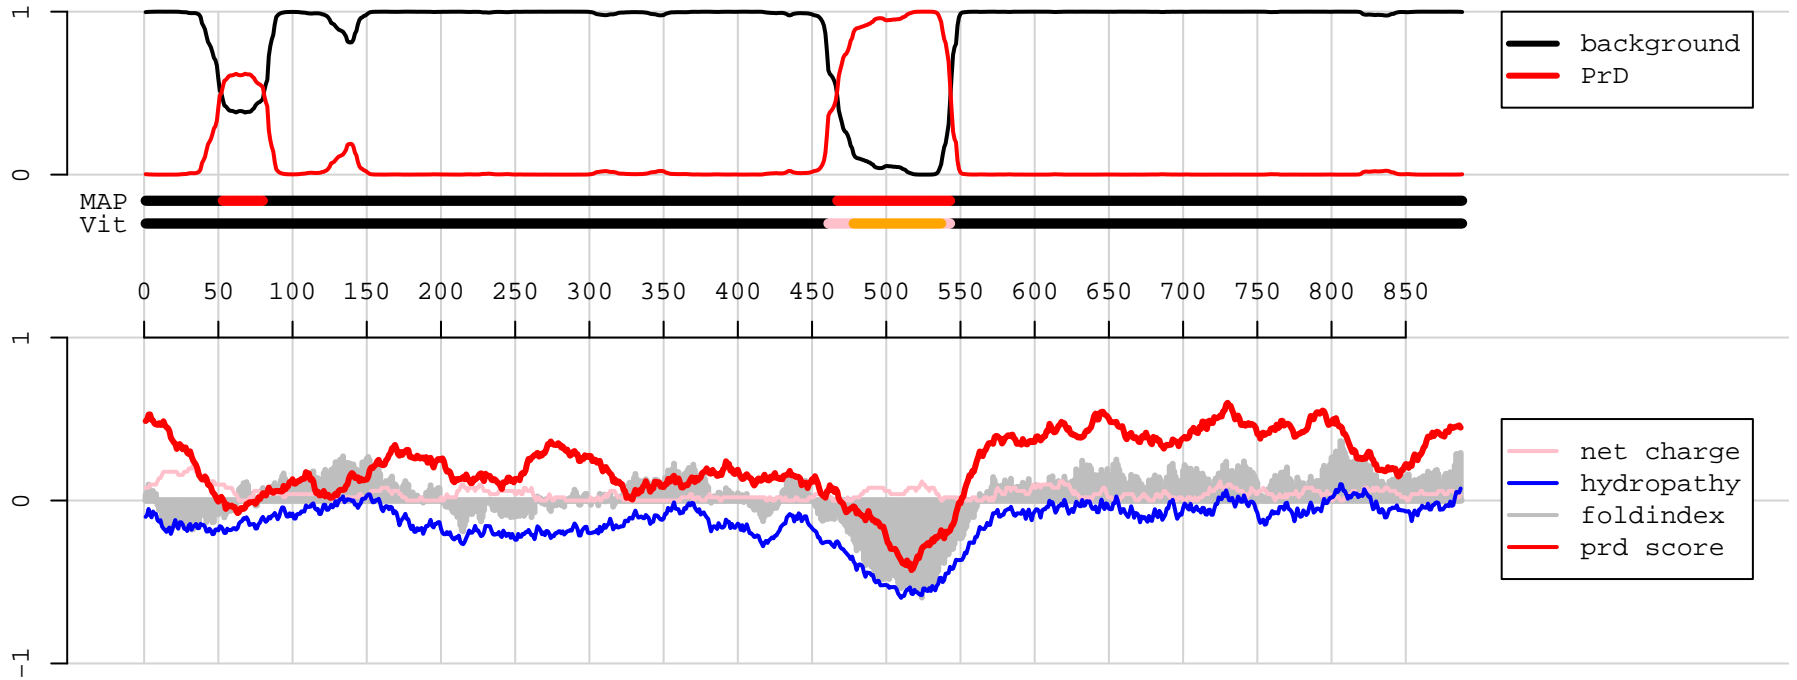

1 MSTKGLKEEIDDVPSVDPVVSETVNSALEQLQLDDPEENATSNFAFANKVSQDSOFANGPPSOMFPHPOMMGGMGFMPYSQMMQVPHNPCPFFPPDFNDP  
 101 TAPLSSSPLNAGGPPMLFKNDLSPFQMLSSGAAVATQGGQNLNPLINDNSMKVLP IASADPLWTHSNVPGSASVAIEETTATLQESLPSKGRESNNKASS  
 201 FRRQTFHALSPTDLINAANNVTLKDFQSDMQNFSKAKKPSVGANNTAKTRTQSI SFDNTPSSTSFIPPTNSVSEKLSDFKIEETSKEDLINTAPAKKES  
 301 PTTYGAAYPYGGPLLQPNPIMPGHPHNISSPIYGI RSPFPNSYEMGAQFPFSPILNPTSHSLNANSPIPLTQSPIHLAPVLNPPSSNSVAFSDMKNDGGK  
 401 PTTDNDKAGPNVRMDLINPNLGPSPMPFHILPPQNTPPPWL YSTPPPFNAMVPPHLLAONHMPLMNSANNKHHGRNNNSMSSSHNDNDNIIGNSNYNNKD  
 501 TGRSNVGKMKNMKNSYHGYYNNNNNNNNNNNNNNNNNNNN SNA TNSNSAEKORKIEESSRFADAVLDQYIGSIHSLCKDQHGC RFLQQLDILGSKAADAIFEET  
 601 KDYTVELMTDSFGNYLIQKLL EEVTTTEQRIVLTKISSPHFVEISLNPHGTRALQKLI ECIKTDEEAQIVVDSL RPYTVQLSKDLNGNHVIQKCLQRLKPE  
 701 NFQFIFDAISDSCIDIATHRHGCCVLQRCLDHGTTEQCDNLCDKLLALVDKLTLD PFGNYVVQYIITKEAEKNKYDYTHKIVHLLKPRAI ELSIHKFGSN  
 801 VIEKILKTAIVSEPMILEILNNGGETGIQSLNDSYGNVYLQTALDISHKQNDYLYKRLSEIVAPLLVGP I RNTPHGKRIIGMLHLDS

# PCF11

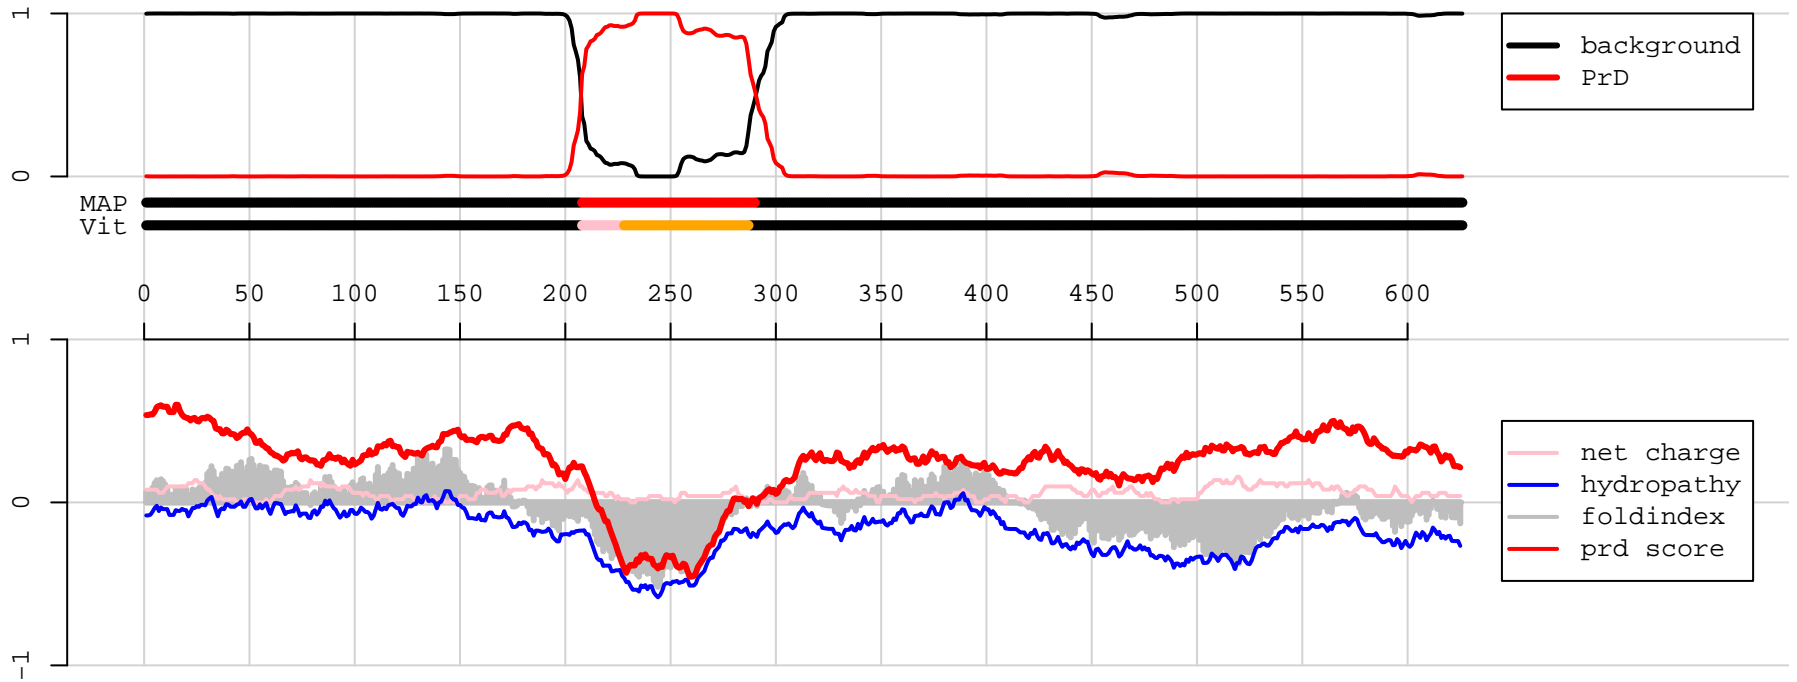

```

1  MDHDTEVIVKDFNSILEELTFNSRPIITTLTKLAEENISCAQYFVDAIESRIEKCMPKQKLYAFYALDSICKNVGSPYTIYFSRNLFNLYKRTYLLVDNT
101 TRTKLINMFKLWLNPNNDTGLPLFEGSALEKIEQFLIKASALHQKNLQAMLPTPTVPLLLRDIDKLTCLTSERLKNQPNDEKLMKLLVLSQLKQELKREK
201 LTLNALKOVQMLROVFSODOOVLOERMRYHELOOOOOOOOOOOOOOOOOOYHETKDMVGSYTONSNSAIPLFGNNSDTTNOQNSLSSSLFGNISGVE
301 SFQEIEKKKSLNKINNLYASLKAEGLIYTPPKESIVTLYKKNLNGHSNYSLSDSHEKQLMKNLPKIPLLNDILSDCKAYFATVNIDVLNPNLQSEQTLLQ
401 ENPIVQNNLIHLLYRSKPNKCSVCGKRFGNSESEKLLQNEHLDWHFRINTRIKGSONTANTGISNSNLNTTTTRKNIQSRNWYLSDSQWAAFKDDEITST
501 KHKNDYTDPHANKNIDKSALNIHADENDEGSVDNTLGSDDRSNELEIRGKYVVVPETSQDMAFKCPICKETVTGVDYDEESGEWVWKNTIEVNGKYFHSTCY
601 HETSQNSSKSNVSGKVLDDLKLVTK
  
```



# SKG6

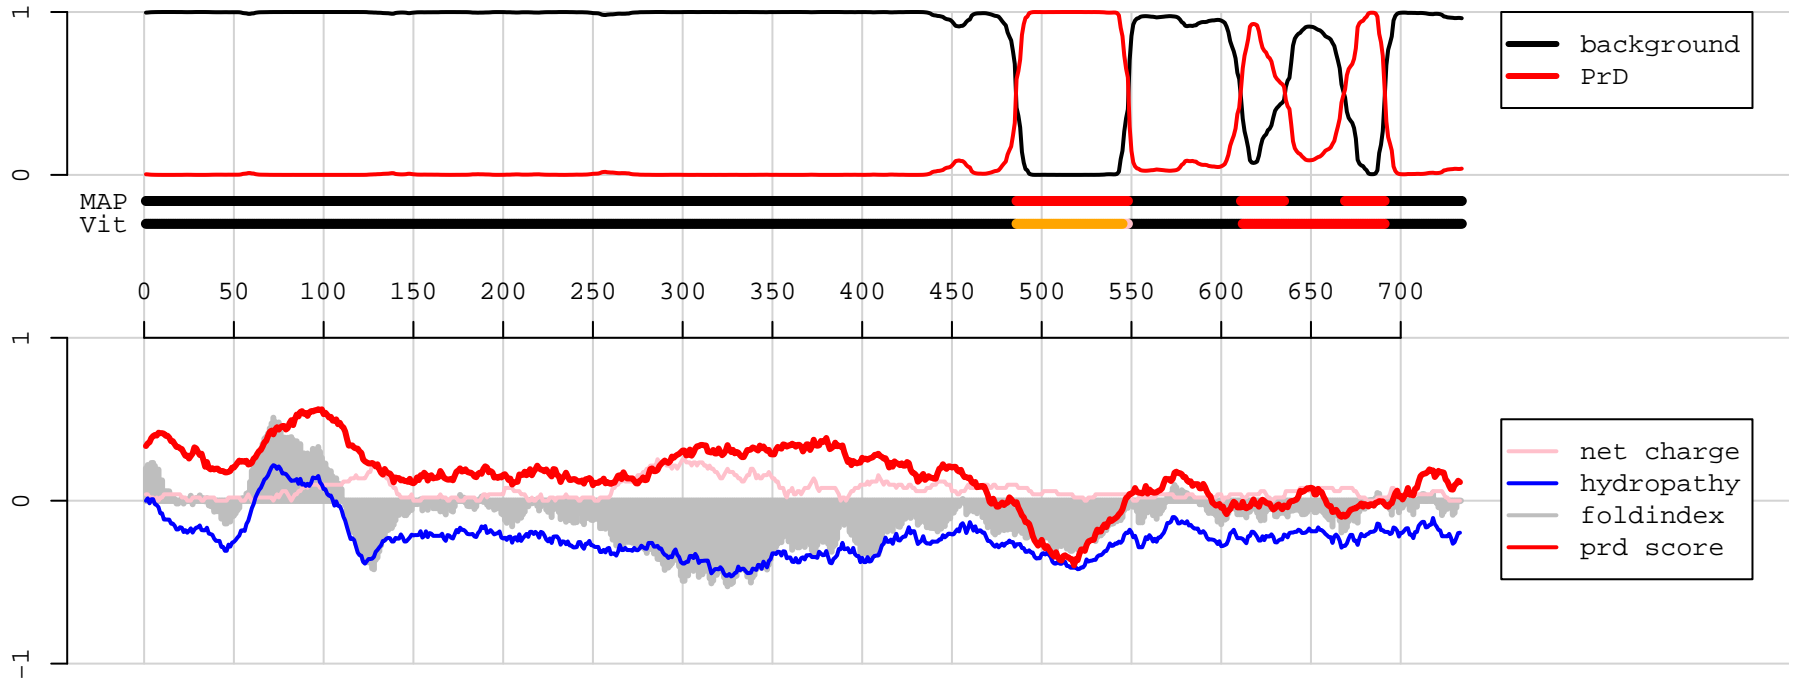

```

1  MYHTMHESLISVTSTVSVSDASYAYARLTRRDDS DSSSSSASSTKNSKSAECTGSKQQCQLPTDSSHSTSVTVGVAVAVPVGVIIIVLAVILCIVYRRS
101 KKEAEEDNDPDFEGDSEFLPTMKDYSPGINHLYSSDSQODFMEKTLQOPSPDFVGSMHSSKYNVRSATPPAIGRSWYVDPFQLPQESNDSNSLRDFAMR
201 VOEDGLGGYKVAAESRNASQTSLHPDNFSNCTPIRASSRFQESSEFRSHGSP IHNNQLSRGSATEGANKQFTFPNEDNDSSSVSEEAEVLNESNESASND
301 AFEFELDNSSEK THERNLRFGKDDDNyelQDIREAEHMNDRSSSKSQDDDYVSLSPNEEEDIKRMKSIYQVYLDRAKTMKKEEDKADNANDISOEENR
401 VDNIVQNPLPSIKINNNNDNIDNNEVPEAKHLVKEALPLNNTNLAEYGPEMAQSOKQYPVQDTLTVNDTEAAPSNRIASSIYSEAI OPLNYODOYOQOQEOS
501 PVYNGHTOYPGNGYSGNPOOQGYTAOFVONPOWYGVP TPQOOQHNPOTLETIGELPTPAYLAQSASSHSLTSFKRPNKQQLLQLQTARLNGTALNPVDH
601 PEMFYSPTNDAYYAPOOQGOYMKFNENGAVPSPYQLRQSVVMTNPSDLTAKPSYKPAGSFRSVSATNSRNNSLTTONNIYLQOQOQOQLYNSRVSGILEET
701 DVVQPPSVGGILPHSGSQDDLRLKQLGSSHNYTVN
  
```

# KSP1

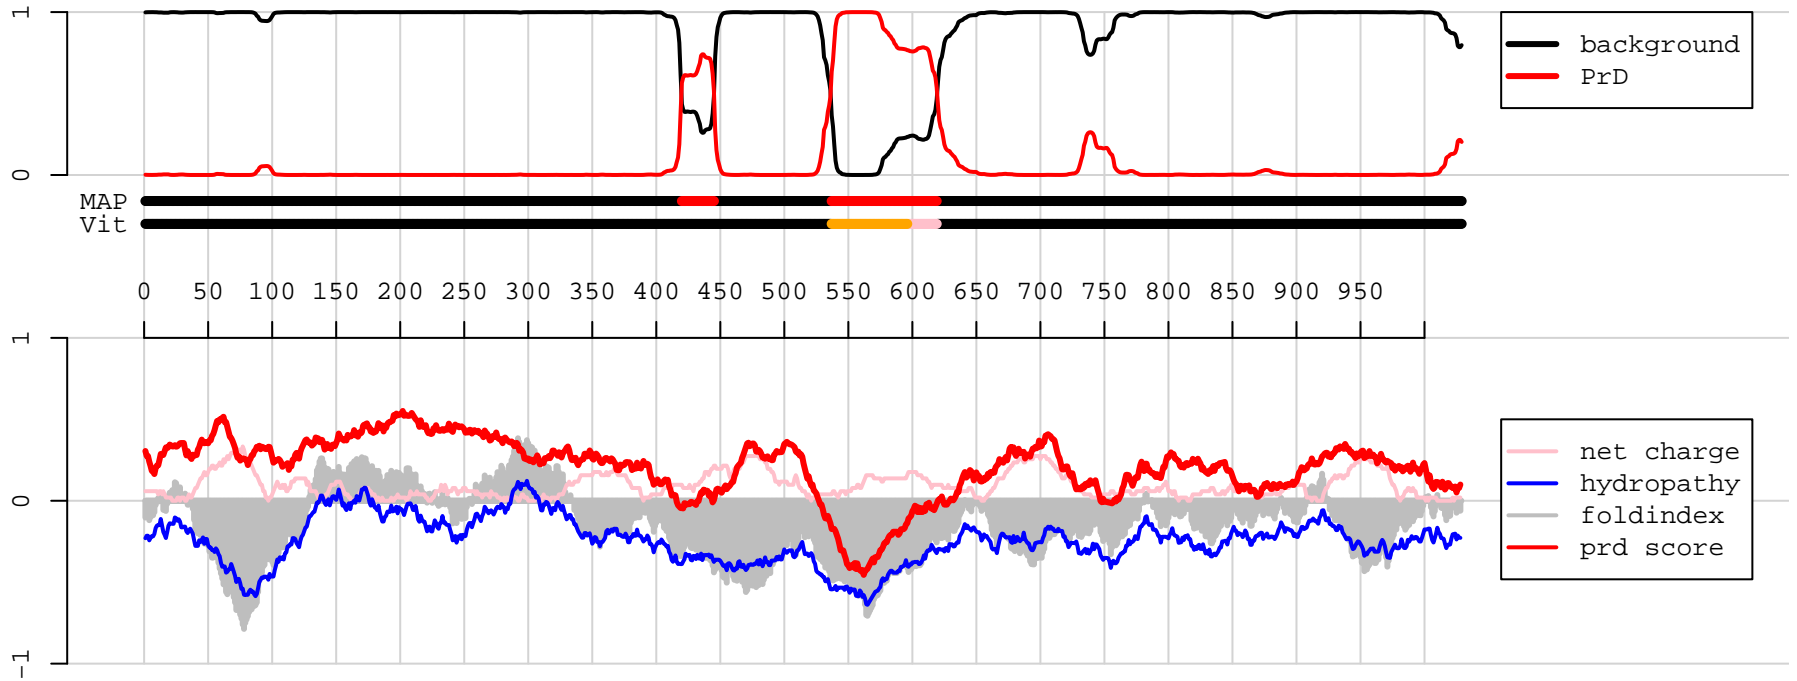

1 MTLDYEIYKEGGILNNRYQKIEDISEGSYGYVSLAKDVREKRLVAVKYIFKLEDDGQYDGPQDDENDCDSSDCDDDEDTKVDTDRHENENGNASSNNGSS  
 101 REKKHNLYKHKKSLISSKVKSRLSNNICLEAMYEVDIQTKIGRHQNI AALLDFFDSYIIMEYCSGGDLYEAIKADAVPKTKSITHIITQIMDAIEYVHN  
 201 KGIYHRDIKPENILISGIDWTIKLTDWGLATTDKTSMDRNVGSEYRMSPELFD SNLDIKERKEPYDCAKVDLWAMGIVFLNIVFHKNPFSIANQSDKSFC  
 301 YFAANREALFDVFMAYDFQVLRYSLTIDPANRDLKMMRTELQNLSEYTL DDEYNNLDEGYEETMIDGLPPQVPVPPSSAPVSLPTPISSSNQHMP  
 401 FKKDFNFNNVNERKRSDVSONONVSGFFKKPSTOQKFFNOGYNTT LSTHERAKSAPKFKFKRNKYGRTDNQFSKPVNIEDRKKSKILKSRKPLGIP  
 501 TPNTHMNNFFHDYKARDEFNTRDFFT PPSVOHRYMEGFSNNNNKQYRONRNYNNNNNNNSNNNHGSNYNNNFNNGNSYIKGWNNKFNKYRRPSSSSYTGKSP  
 601 LSRYNMSYNHNNNSSINGYARRGSTTTVOHSPGAYIPPNARNHHVSP TNQFLRVPOSTAPDISTVLGGKPSYQEHYTQDSMDSEGDHDSDDVLF TLEEGD  
 701 HDFVNGMDNLSINDHLPHTTVGSHNEVFVHASTNHNNGNNGNNHIDT NSTTNOYHROYIPPPLTTSLSLHNNNNNESNELPDLKSPASSEAHLNLSGGPID  
 801 PILTGNIGNRYSHSSDSKELEQERRLSMEQKFKNGVYVPPHHRKSFNLGTQVPPMNMKTSNEATLSVSHNSVNFVGGSYNSRRSSANESNPLHMNKALEKL  
 901 SSSPGAKSSFFVGFPKPLLPRNHSSTTIALQNEVDVFADSNNDAIIFEDEEYEGESDKMAHGKMEGGDNESSTSPDERQIFGPYEIYAQTFAGSTHDKKLG  
 1001 AGRKTSIQDEMVGSLQYKNNWLILQQD

# PEX13

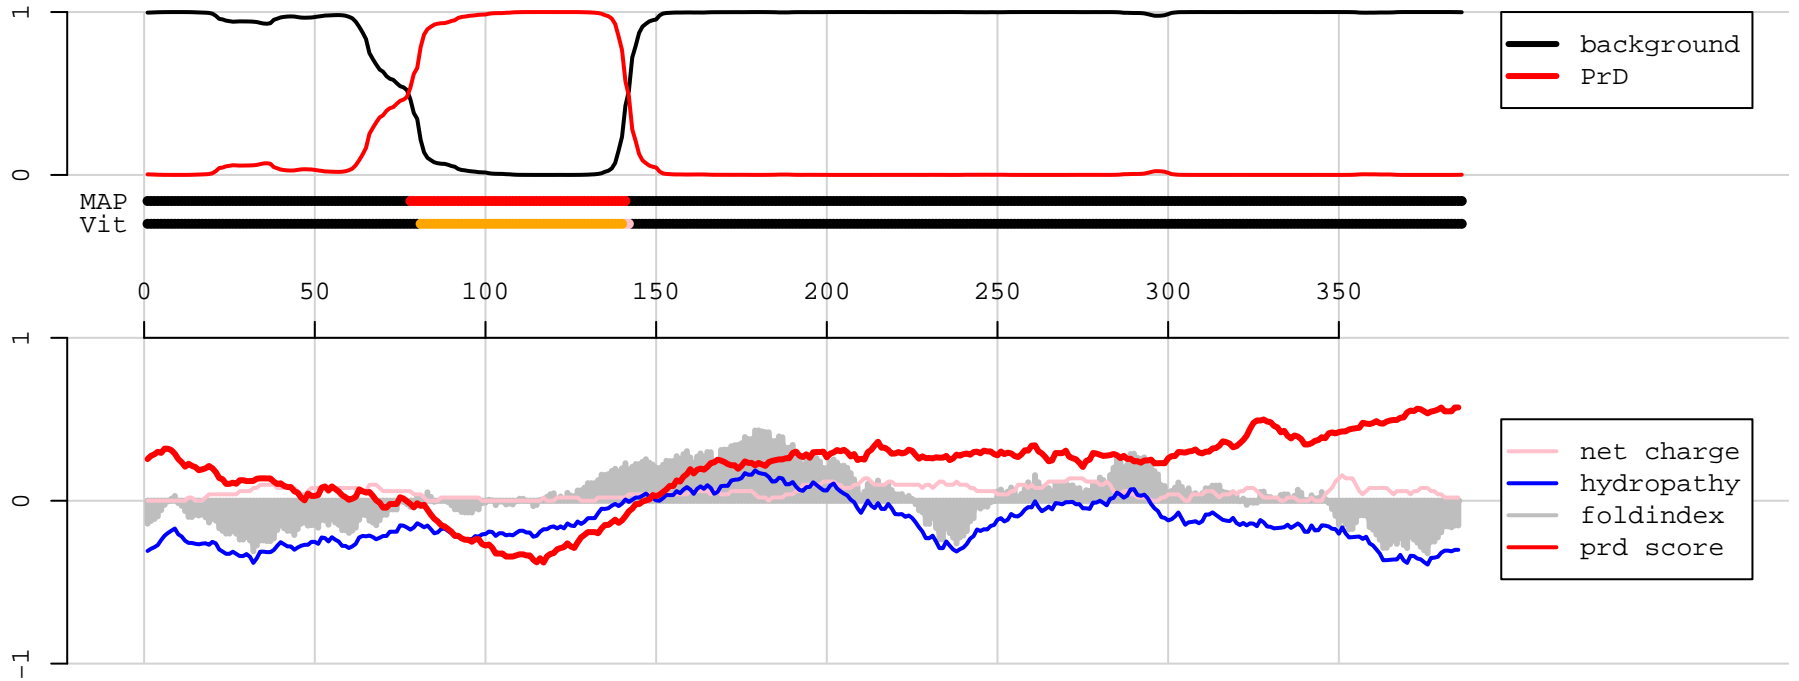

1 MSSTAVPRPKPWETSASLEEPORNAQQLSAMMTSNQODSRPTEESNNSNSASESAPEVLPRPAALNSSGTYGESNTIPGIYGNSNYGIPYDNNPYSMNSI  
 101 YGNSIGRYGYGGSYYGNNYGSFYGGGYGAGAGYGMNNGSGLGESTKATFQLIESLIGAVTGFAQMLESTYMATHNSFFTMISVAEQFNLKEMLGSFFGI  
 201 FAIMKFLKKILYRATKGR LGIPK NFAESEGSKNKLIEDFOKFND SGTINSNEKATRRKISWKPLLFFLMAVFGFPYLLNKFITKLQTSGTIRASQNGS  
 301 EPIDPSKLEFARALYDFVPENPEMEVALKKGDLMAILSKKDPLGRDSDWVKVRTKNGNIGYIPYNYIEIIKRRKKIEHVDDETRTH

# DDR48

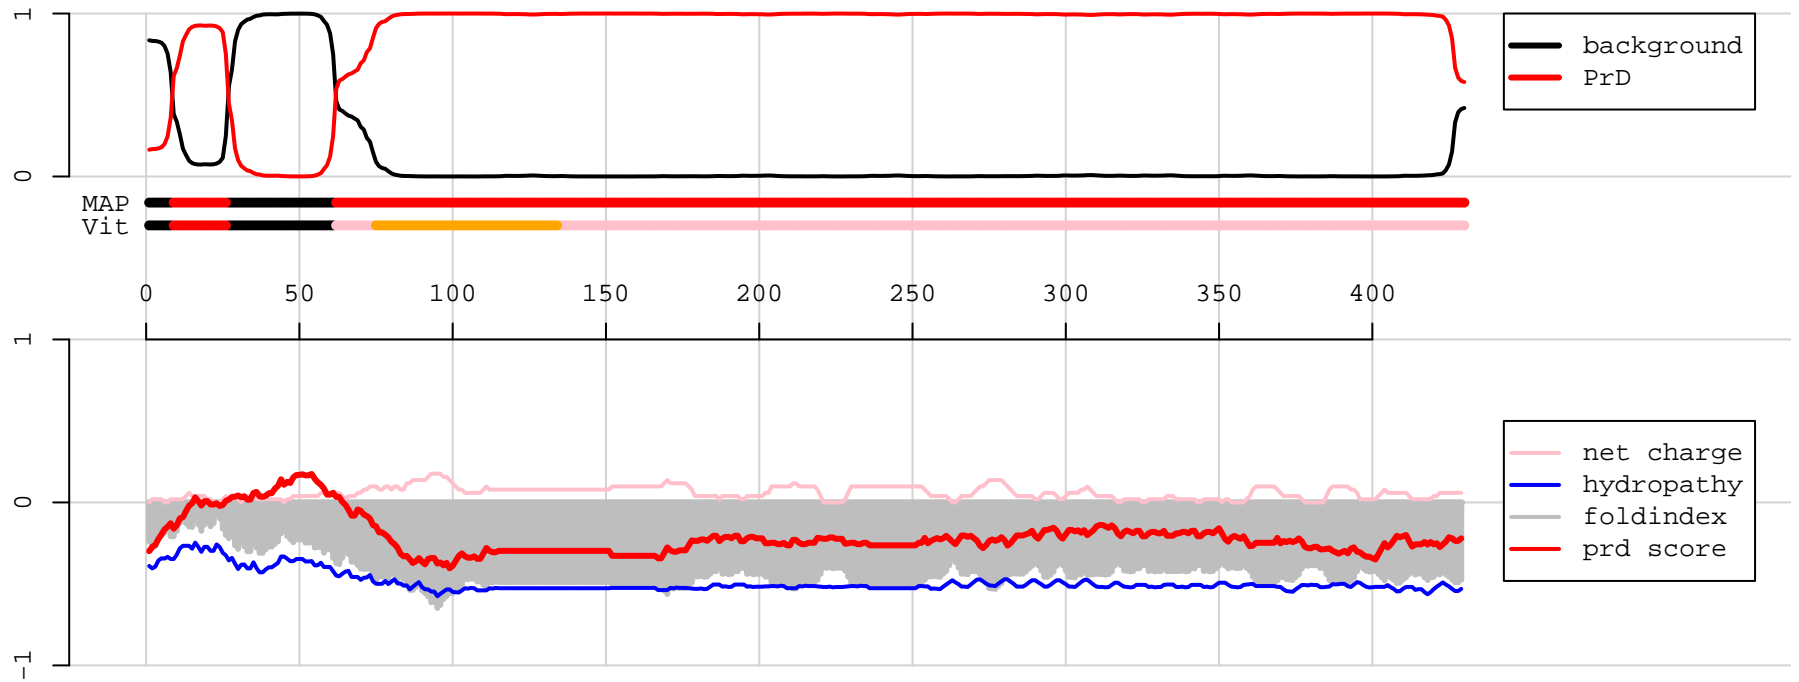

1 MGLFDKVKQFANSNNNNNDSGNNNQGDYVTKAENMIGEDRVNQFKSKIGEDRFDKMESKVRQOFSNT'SINDNDSNNNDSYGSNNNDSYGSNNNDSYGSNN  
 101 NDSYGSNNNDSYGSNNDDSYGSSNKKKSSYGSNNDDSYGSSNNNDSYGSNNNDSYGSNNNDSYGSNNDDSYGSSNKNKSSYGSNNDDSYGSNNDDSYGSS  
 201 NKKKSSYGSNNNDSYGSNNDDSYGSNNNDSYGSNNDDSYGSSNKKKSSYGSNNDDSYGSNNNDSYGSNNDDSYGSSNKNKSSYGSSNDDSYGSNNDD  
 301 SYGSSNKKKSSYGSNNDDSYGSNNDDSYGSSNKKKSSYGSNNDDSYGSNNDDSYGSSNKKKSSYGSNNDDSYGSSNNNDSYGSNNDDSYGSNNDDSYGSSNRNKNSYG  
 401 SSNYGSSNNDDSYGSSNRGGRNOYGGDDDY

# EPL1

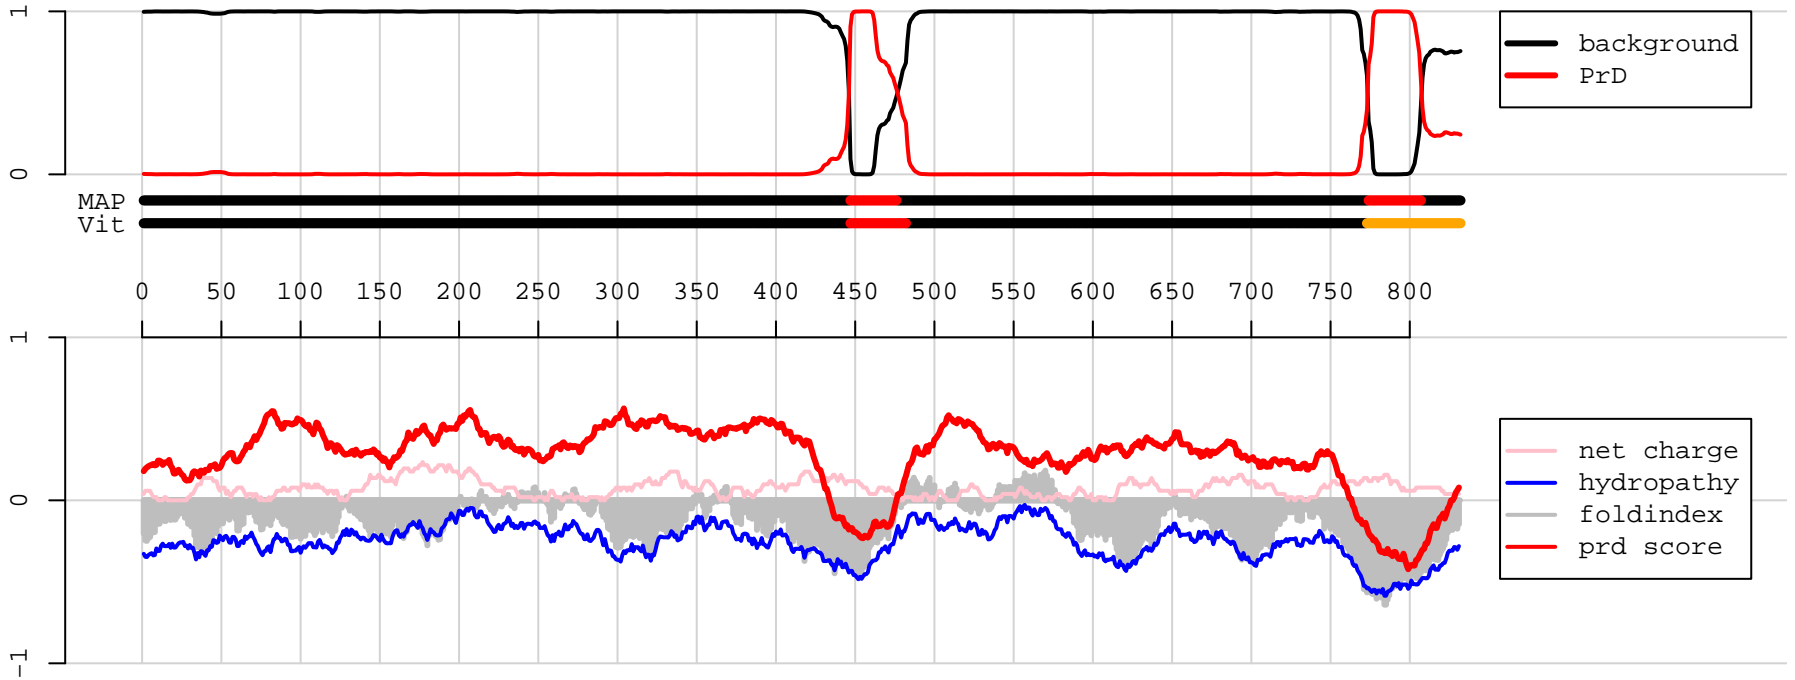

```

1  MPTPSNAIEINDGSHKSGRSTRRSGRSRAHDDGLDSFSKGDGAGASAGSSNSRFRHRKISVKQHLKIYLPNDLKHLDKDELOQREVVEIETGVEKNEEK
101 EVHLHRILQMGSGHTKHKDYIPTDASMTWNEYDKFYTGFSFOETTSYIKFSATVEDCCGTNYNMDERDETFLNEOVNKGSSDILTEDEFEILCSSFEHAI
201 HERQPFLSMDPESILSFEELKPTLIKSDMADFNLRNQLNHEINSHKTHFITQFDPVSQMNTRPLIQLIEKFGSKIYDYWRERKIEVNGYEIFPQLKFERP
301 GEKEEIDPYVCFRRREVRHPRKTRRIDILNSQRLRALHQLKNAKDLALLVAKRENVSLNWINDELKIFDQRVKIKNLKRSLNISGEDDDLINHKRKRPT
401 IVTVEQREAELRKAELKRAAAAAAAAAAKAKNNKRNNOLEDKSSRLTKOQQOQLLOQQOQQOONALKTENGKOLANASSSSTSQPITSHVYVKLPSSKIPDI
501 VLEDVDALLNSKEKNARKFVQEKMEKRKIEDADVFFNLTDDPFNPVFDMSLPKNFSTSNVPFASIASSKFQIDRSFYSSHLPEYLGKISDDIRIYDSNGR
601 SRNKDNYNLDTKRIKKTELYDPFOENLEIHSREYPIKFRKRVGRSNIKYVDRMPNFSTTSSTKSACSLMDFVDFDSIEKEQYSREGSNDDTDSINVYDSKYD
701 EFVRLYDKWKYDSPQNEYGIKFSDEPARLNQISNDTQVIRFGTMLGTGSYEQLEATIKYRRDYITRLKQKHIOHLLOOOOOOOOOOOOAAOQOKKSONN
801 NSNSSNSLKKLNDSLINSEAKONSSITQKNSS

```

TIF4632

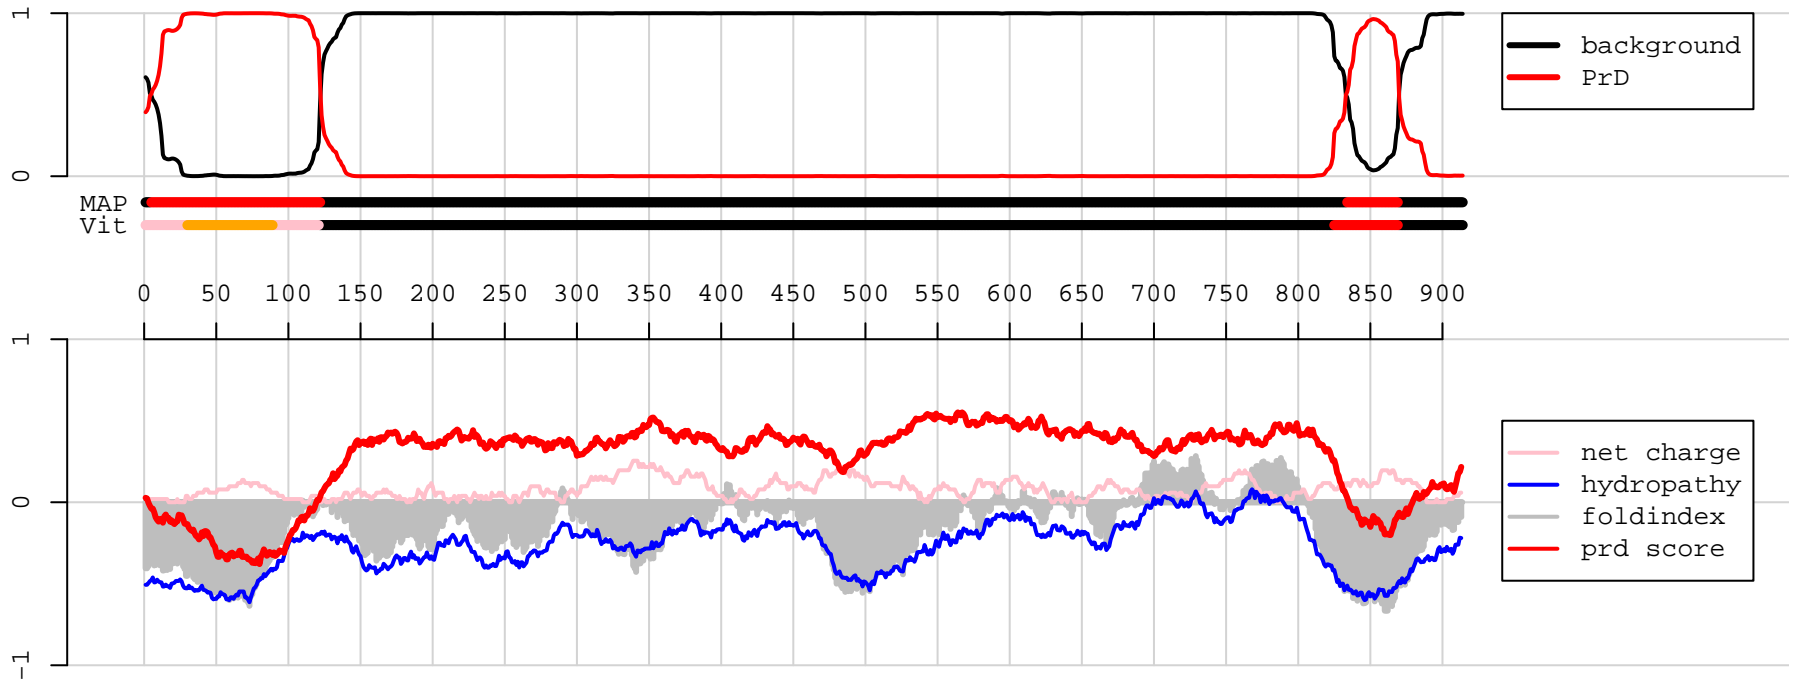

1 MTDORGPPPPHPOOANGYKKFPPHDNOYSGANNSOPNNHYNENLYSAREPHNNKOYOSKNGKYGTNKYNNRRNNSOGNAOYNNR FNNGYRLNNDNDYNPAM  
 101 LPGMOWPANYYA POMYYI PQOMVPVASPPYTHQPLNTNPEPPSTPKTTKIEITTKTGERLNLKKFHEEKKASKGEEKNDGVEQKSKSGTPFEKEATPVL  
 201 ANEAVKDTLTETSNEKSTSEAKTKRLFLEQVRLRKAAMERKKNGLISETTEKQETSNDHNTDTTKPNVIESEPIKEAPKPTGEANEVVIDGKSGASVK  
 301 TPQHTVGSVTKSVTFNEPENESSQDVDELVKDDDTTEISDTTGKTVNKSDDDETINSVITTEENTVKETEPSTSDIEMPTVSQLETLGKAQPI SDIYE  
 401 FAYPENVERPDIKYKKPSVKYTYGPTFLLQFKDKLKFDPDPAWVEAVSSKIVIPPHIARNPKDSGRFGGDFRSPSMRGM DHTSSSRVSSKRRSKRMGDD  
 501 RRSNRGYTSRKDREKAAEKAEEQAPKEE IAPLVPSANRWIPKSRVKKTEKKLAPDGKTELFDKEEVERKMKSLNKL TLEMFDSSISSEILDIANQSKWED  
 601 DGETLKIVIEQIFHKACDEPHWSSMYAQLCGKVVKDLDPNIKDKENEGKNGPKLVHLVARCHEEFEKGWADKLPAGEDGNPLEPEMMSDEYYIAAAAK  
 701 RRGLGLVRFIGYLYCLNLLTGKMMFECFRRLMKDLNNDPSEETLESVIELLNTVGEQFEHDKFVTPQATLEGSVLLDNLFMLLQHIIDGGTISNRIFKFL  
 801 IDVKELREIKHWNSAKKDAGPKTI QQIHQEEEQLRQKKNRSQRSNSRFNNHNQSNNSNRYSSNRRNMONTQRDSFASTKTGFSFRNNQRNARKVEEVSQAPRA  
 901 NMFDALMNNDGDSD

# CLA4

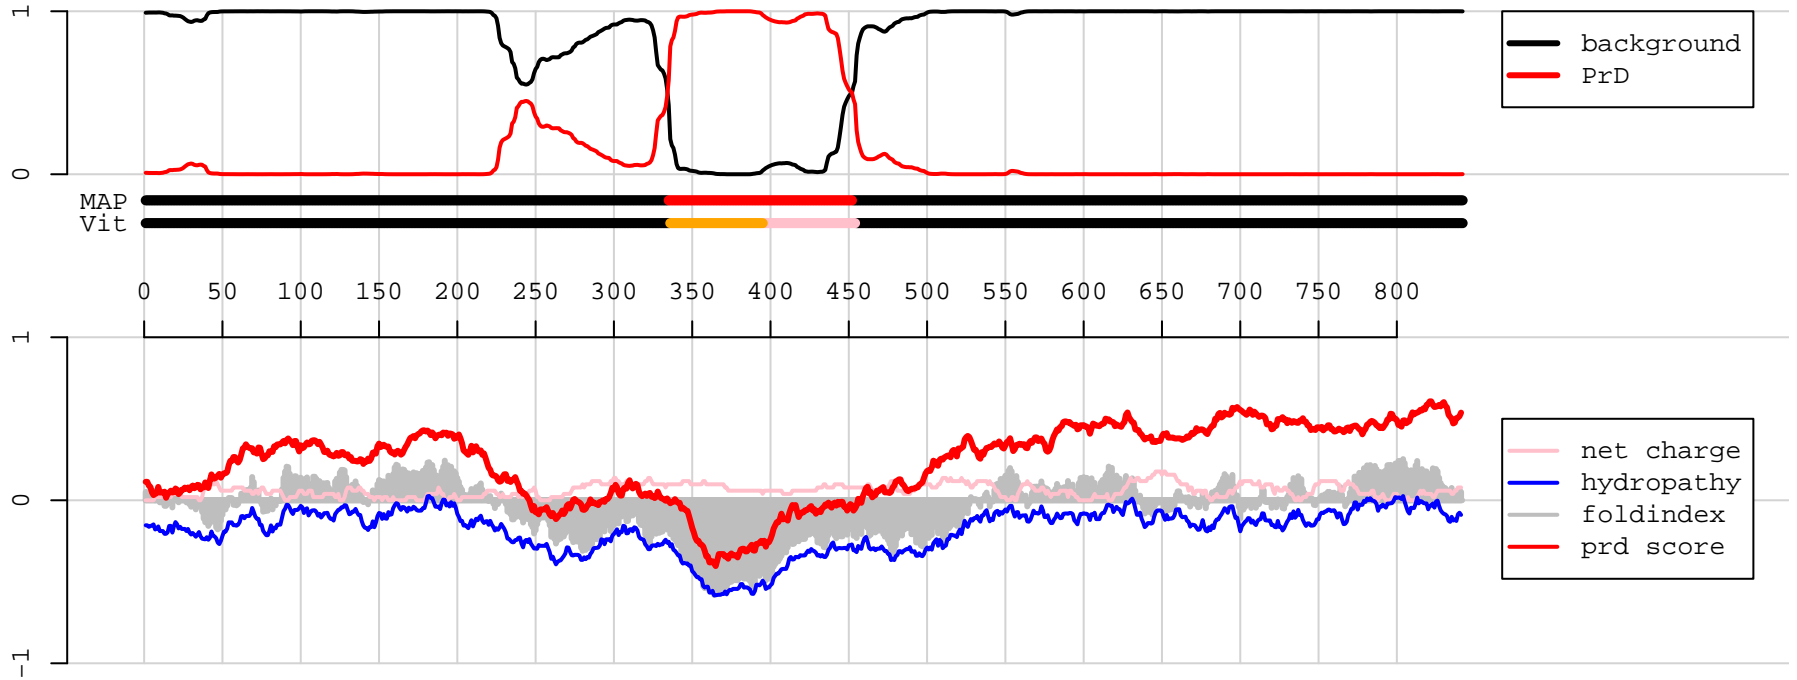

1 MSLSAAANKISDNDFQNI GPAPRPPSSNSQGRTCYNQTOPITKLMSQLDLTSASHLGTSTSKKSGWVSYKDDGILSFIWQKRYLMLHDSYVALYKNDKQ  
 101 NDDAILKIPLTSII SVSRTQLKQYCFELVRCSDRNSVSSGSSSSSLNVSSDSNSKKSIIYIATKTESDLHSWLD AIFAKCPLL SGVSSPTNFTHKVHVGFD P  
 201 ETGSFVGMPTNWEKLLKHSRITGEDWNNNSAAVIOVLQFYQ EYNGAGNPTNTLDKPOSGETSSSOKSLPNSYNDNKL RNNSVNSKSSSGVSSSMVSQRKT  
 301 SQPNTKSPVSLGSGSLPPINTKLPTSQSNIPRHL ONVPNOOYPKMRNGHSPTNGOFPRGPMHPNNSORSLOOOOOOOOOO KOOHOOPYHHOGPSPSPS  
 401 PSPSPLNPYRPHHNMINPYSKOPOSPLSSOSTONOAIPRYAONSSPTAAHFOP ORTAPKPPISAPRAPYPSNQONATSNTHVQPVAPKNDQSTPOTMRQAP  
 501 KRPDADVAQPGGVAKPKKPARPTMSTAEIMSKLKKVTVNADPSQCFKVI EKAGQGASGSVYLAERTHIPTESNMIELINNDIDEPHVGDKVAIKQMVLSK  
 601 QPRKELIVNEILVMKDSRHKNIVNFLEAYLRTDDDLWVVM EFMEGGSLTDIIENSPTNDNSHSPLTEPQIAYIVRET CQGLKFLHDKHIIHRDIKSDNVL  
 701 LDTRARVKITDFGFCARLTDKRSKRATMVGTPYWMAPEVVKQREYDEKIDVWSL GIMTIEMLEGEPPYLNEDPLKALYLIATNGTPKLKHPESLSLEIKR  
 801 FLSVCLCVDVRYRASTEELLHHGFFNMACDPKDLTSLLEWKE

# HRR25

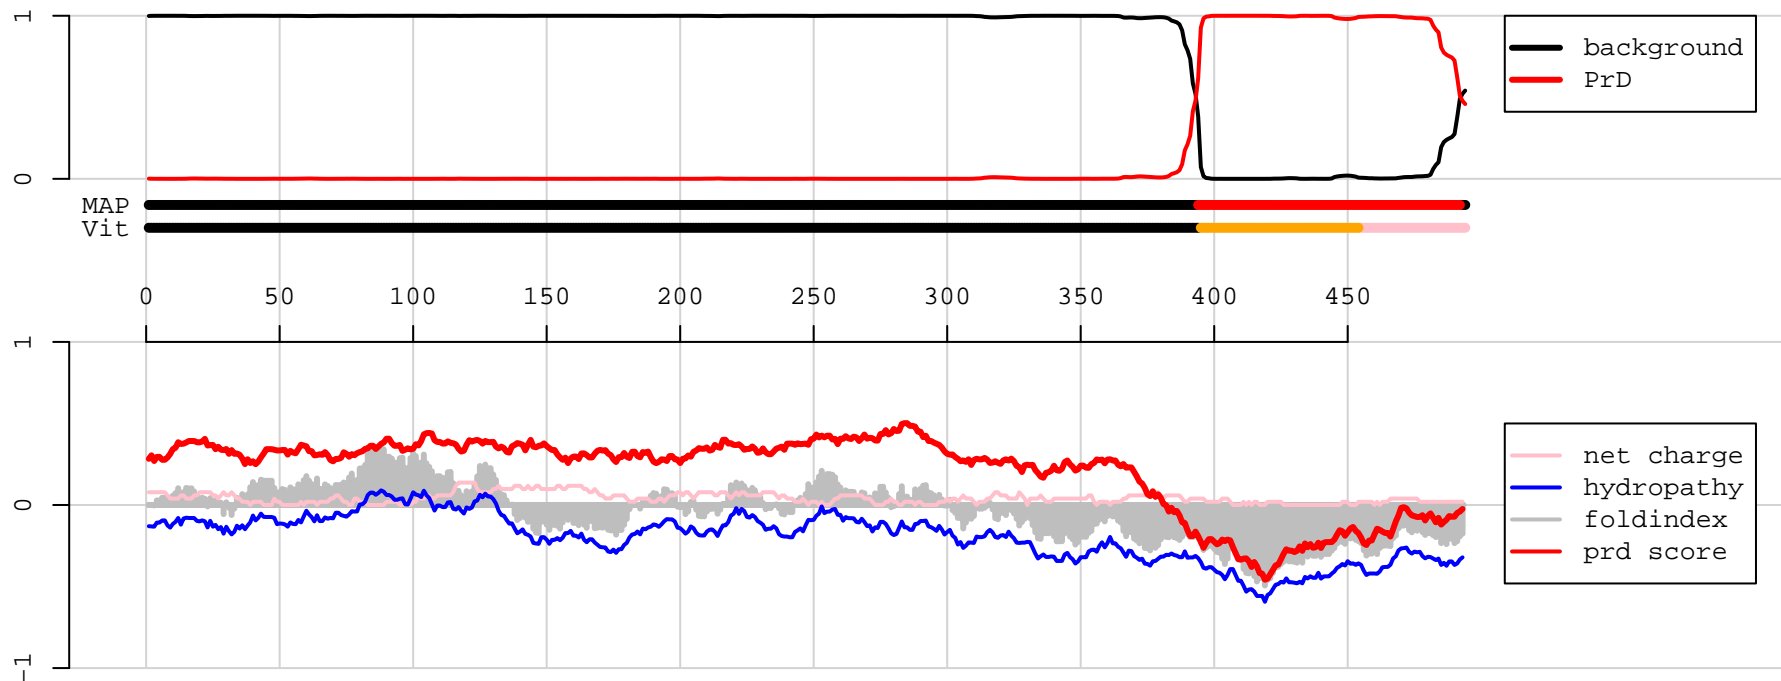

1 MDLRVGRKFRIGRKIGSGSFGDIYHGNTNLISGEEVAIKLESIRSRHPQLDYESRVYRYLSGGVGIPFIRWFGREGEYNAMVIDLLGPSLEDLFNYCHRRF  
 101 SFKTVIMLALQMFCRIQYIHGRSFIHRDIKPDNFLMGVGRRGSTVHVVIDFGLSCKYRDFNTHRHIPYRENKSLTGTARYASVNTHLGIEQSRDDLES LG  
 201 YVLIYFCKGSLPWQGLKATTKKQYDRIMEKKNVSVETLCSGLPLEFQEY MAYCKNLKFDEKPDYLF LARLFKDLSIKLEYHNDHLFDWTMLRYTKAMV  
 301 EKQRDLLIEKGLNANSNAASASNSTDNKSETFNKIKLLAMKKFPTHFHYYKNEDKHNP SPEEIKQOTILNNAASSLPEELLNALDKGMENLR OOOPOO  
 401 OVSSOPOPOPOOLOOOPNGORPNYYPEPLL000ORDSOE0000VPMATTRATOYPP0INSNNFNTNOASVPPOMRSNPOOPP0DKPAGOSIWL



## SNF2

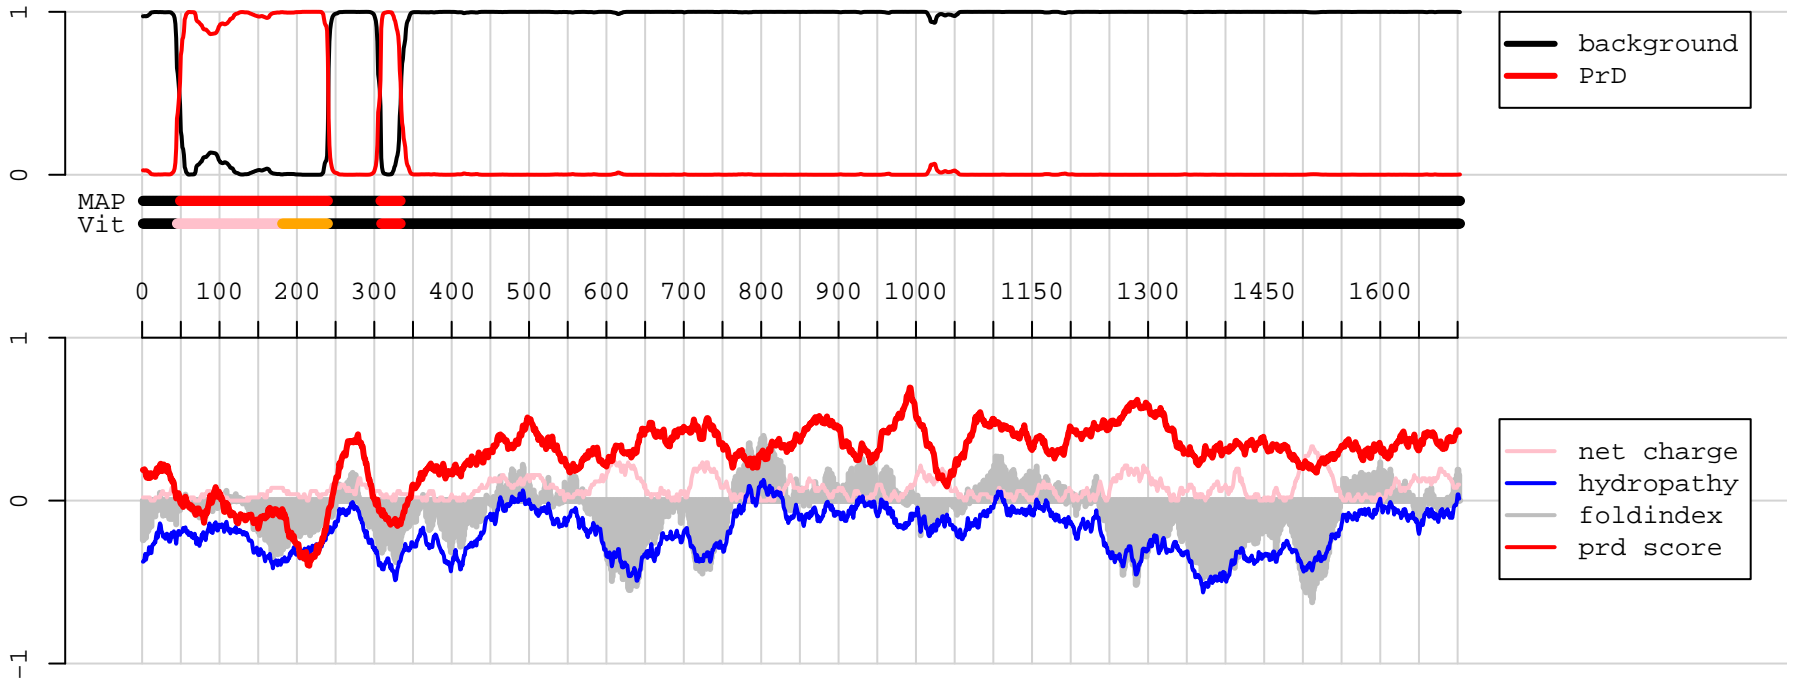

```

1  MNIPQRQFSNEEVNRCYLRLWQHRLRNEHGMNAPSVPFEFIYLTQVLQFAAKOROELQMQR00GI SGSOONIVPNSSDOAELPNNASSHISASASPHLAPNM
101 QLNGNETFSTSAHOSPI MOTOMPLNSNGGNM LPOROSSVGSINATNFSPTPANNGENAAEKPDNSNHNNLNLNNSELOPQNRSLQEHNIQDSNVMPGSO
201 INSPMPOQAOMQQAQFOAQAQAQAQAQAQAQAQAARLOOGRRLPMTMFTAEQSELLKAQITSLKCLVNRKPIPFQAVIQKSIHPPDFKRMLLSLSEF
301 ARROPTDONNOSNLNGGNNTQOPGTNSHYNNTNTDNVSGLTRNAPLDSKDENFASVSPAGPSSVHNAKNGTLDKNSQTVSGTPIQTESKKEENETISN
401 VAKTAPNSNKTHTEQNNPPKPKQKPVPLNVLQDOYKEGIKVVDIDDPDMMVDSFTMPNISHSNIDYQTL LANS DHAKFTIEPGVLPVGI DTHTATDIYQTL
501 IALNLDTTVNDCLDKLLNDECTESTRENALYDYALQLLPLOKAVRGHVLQFEWHQNSLLTNTHPNFLSKIRNINVO DALLTNQLYKNHELLKLERKKTE
601 AVARLKS MNKSAINQYNNRQDKKNRKLKFGHRLIATHTNLERDEQKRAEKKAKERLOALKANDEEAYIKLLDQTKDTRITHLLRQTN AFLDSLTRAVKDO
701 QKYTKEMIDSHIKEASEEVDDL SMVPKMKDEEYDDDDDNSNV DYYNVAHRIKEDIKKQPSILVGGTLKDYQIKGLQW MVSLFNNHLNGILADEMGLGKTI
801 QTISLLTYLYEMKNIRGPYLVI VPLSTLSNWSSEFAKWAPTLRTISFKGSPNERKAKQAKIRAGEFDVVLTTFEYI IKERALLSKVKWVHMI IDEGHRMK
901 NAQSKLSLTLNTHYHADYRLILTGTPLQNNLPELWALLNFVLPKIFNSVKS FDEWFNTPFANTGGQDKIELSEETLLVIRRLHKVLRPFLLRRLK KDVE
1001 KELPDKVEKVVCKMSALQOIMYQOMLKYRRLF IGDNKKM VGLRGFNNOIMQLKKICNHFPVFVEEVEDQINPTRETND DIWRVAGKFELLDRI LPKLK
1101 ATGHRVLIFFQMTQIMDIMEDFLRYINIKYLRLDGHTKSDERSELLR LFNAPDSEYLCFILSTRAGGLG LNLQTADTVIIFD TDWNP HQDLQAQDRAHRI
1201 GQKNEVRILRLITTSNVEEVILERAYKKLDIDGKVIQAGKFDNKSTSEEQ EALLRSLLDAAEEERRKKRESGV EEEEEELKDSEINEILARNDEEMAVLTRM
1301 DEDRSKKEELGVKSRLLEKSEL PDIYSRDIGAE LKREESESAAVYNGRGAREKKTATYNDNMSEEQWLRQFEVSDDEKNDKQARKORTK KEDKSEAIDG

```

# SKG3

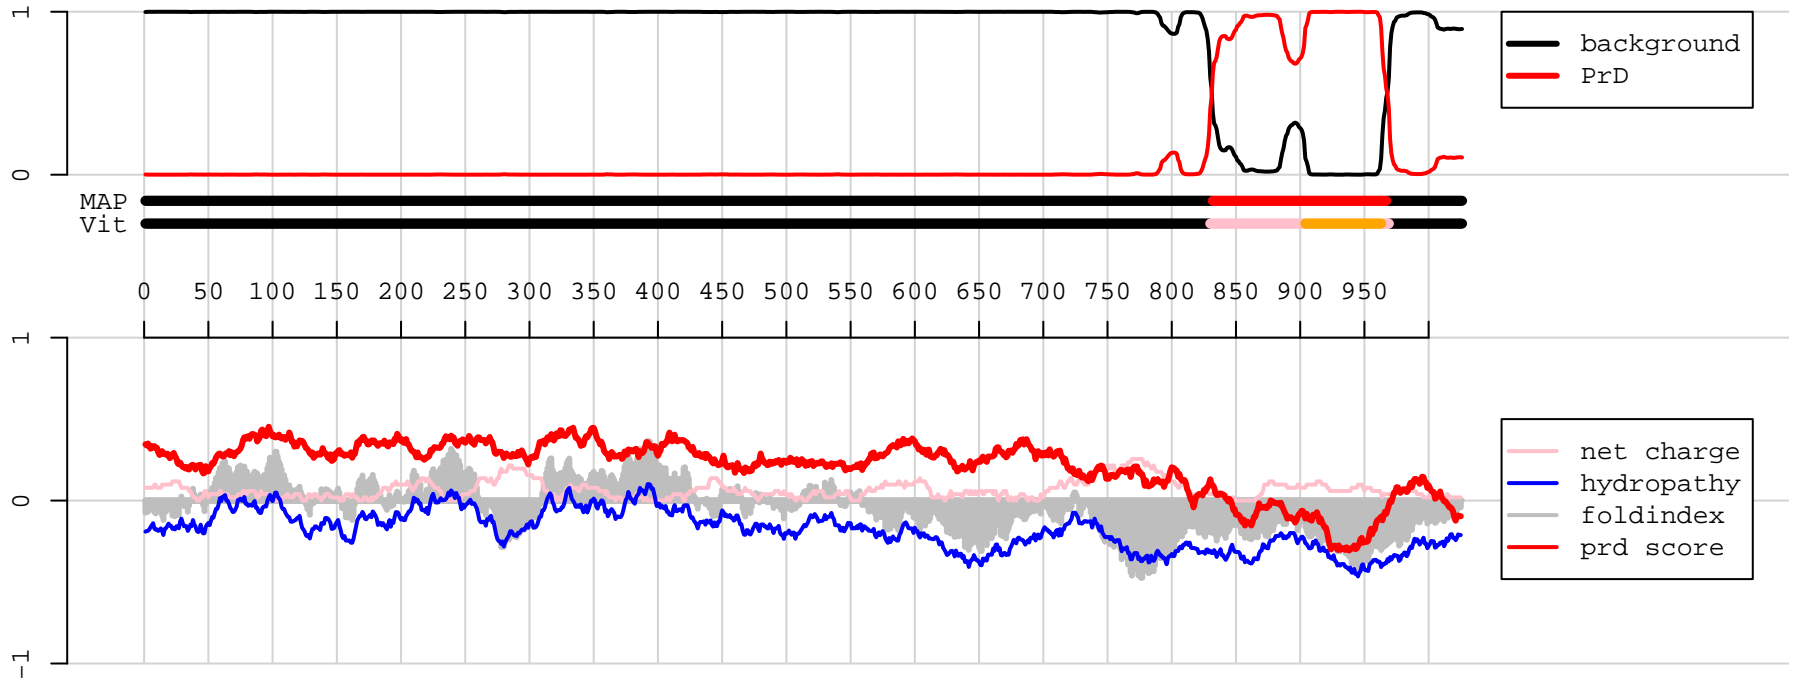

1 MKRIFSGVKSPKLSAPPKVFKNDESPSTPSSPKFDQGLRSLASASRLFSNSISTPGSPTLDLPQEHSINGDISPELVPIVTLLSAQAHRRYHYGIFLIL  
 101 HDLKTDTGTPAARQWEECYGVLLGTQLALWDAKELSDSKNNKNTSTMKKAASRPSFINFTDASVRSLDANDQVIIASENEKTKKDLDNVLLVSTTLKNRYF  
 201 LKFKNSKSFKTWNAAIRLSLFEFTALQEAYTGSFLSSRGVKLGDIKVVMDTKFTYEDWVSVRFGTGMPWKRCYAVISPOSGKKKNSKGSICFYENKK  
 301 TKKSNIMTTVV DARALYAVYPSSPILIDTSTIIKLEGFVSFDKSEEPQETNLFIMPEKHQGVPGYDTIIRFLIPAMNAFYLYGRPGLIANRTDPDSSLF  
 401 ALPTLPHIYYLQVDDVLSLTKDKNYIHWSAADWRNNIVQVLQKKLSKGYKGCNKT VSVSSGMMKSPAISSAELFEGYDSLPERQMESPOKSKMKSPTLA  
 501 STDDINSASASVNSHATSVKQTELFVTDNSSKINDSVSAQSSVTTFNFKDTFTTPMTSGMLNHENSERSFGSGLKLIKITDSNLNEMEDVEAKSANEFSTTP  
 601 EDKHIHLANA AELSALYDKYSTSPFGKSEANSSPKPQKLEVKDRSKNENRSPYERYVGTSAESKTFEIGNVRESKSTINTSLSSPLRVEDSRRSKNEDLG  
 701 SLKEFEELSQKISNMGMANISSEALSDTAENSSFVTDLNLNINNSSSVNLNEEQRVPDFGEENVFDPDYMEQNQMLETESRYTTDFDFSDNQDAASSNY  
 801 SNGQTNRTVTETLSASDRNDKIPHSSLFT NLNQLT SNGGNYODREDFSGDOI NKPOOSOPLHVKG POTSSFGYRNSSANSSOPOAPYPVGRPLGKIR TGP  
 901 LTVOPMOGGNSSMYSFOSSOHRFHSSOORONQSLSFRNNTYGSNNONTFHPSPOLOOOPONMRYLNNKLPINDRSPIPQTQHHPVDPGRPSLHINTTNR  
 1001 TNPLTAQSGFSQFMPPNSTSTNPNYSS

# NUP49

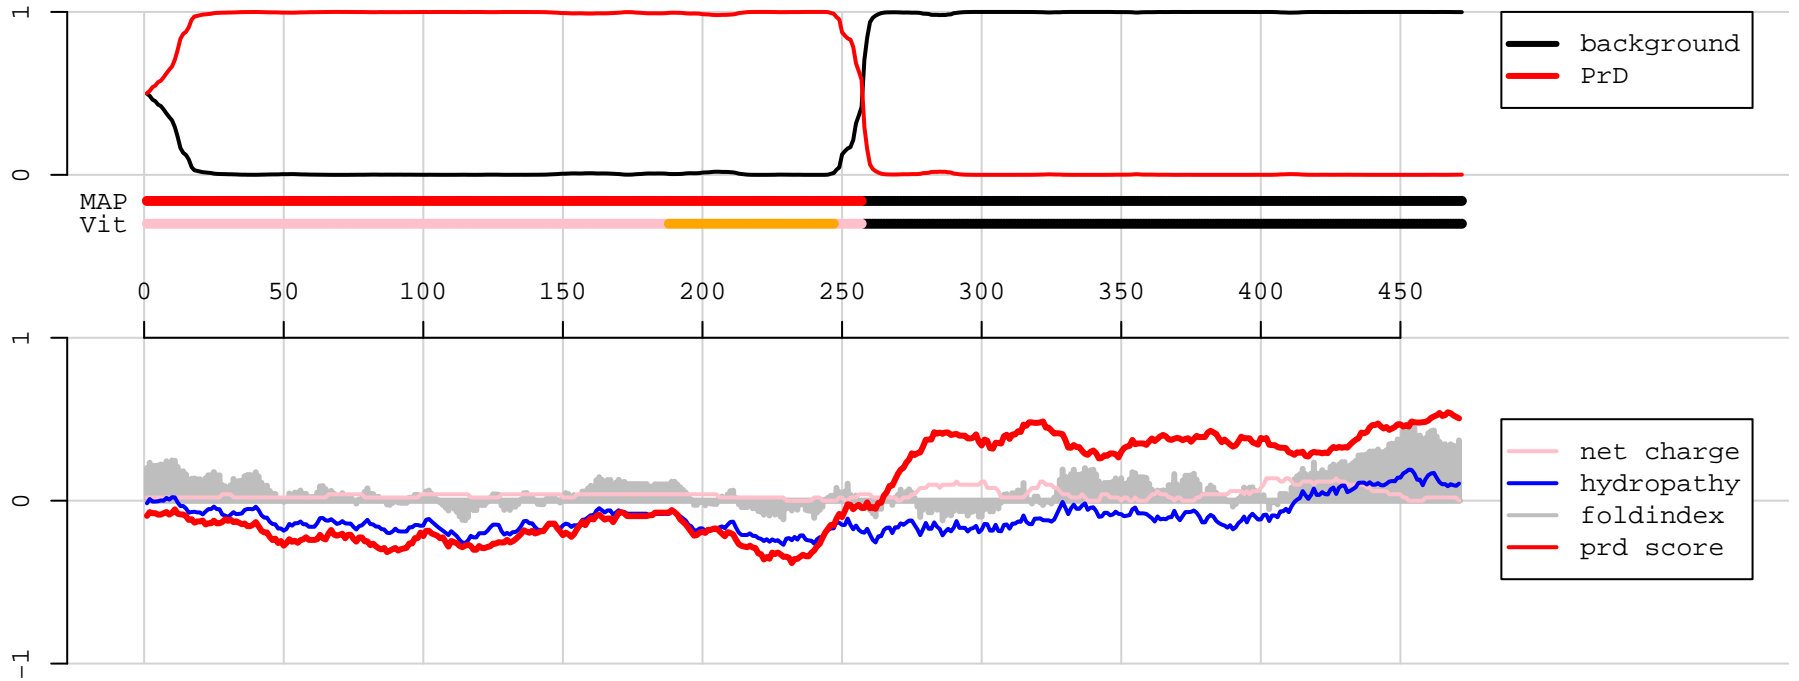

1 MFGLNKASSTPAGGLFGOASGASTGNANTGFSFGGTOTGONTGPSTGGLFGAKPAGSTGGLGASFG00000SOTNAFGGSATTGGGLFGNKPNNNTANTGG  
 101 GLFGANSNSNSGSLFGSNNAOTSRGLFGNNNTNNINNSSGMNNA SAGLFGSKPAGGTSILFGNTSTSSAPAONOGMFGAKPAGTSLFGNNAGNTTTGGGL  
 201 FGSKPTGATSLFGSSNNNNNNNNNSNNIMASGGLFGN0000LOOQPOMOCALONLSOLPITPMTRISELPPQIRQEIEQLDOYIQKOVQISHHLKADTID  
 301 HDELIDSI PRDVAYLLKSESATSQYLKQDLKKISSFKSLIDEDLLDTQTFVLLQQLLTPGSKISSNDLDKFFQKKIHLYEKKLEDYCRILSDIETAVNG  
 401 IDTDLFGAPNNPNSTAITADLGSSEAENLLQLKTGLAAIVSTVIEEFTLFMDIAERIAVLHQKTKTLASLSI

# WWM1

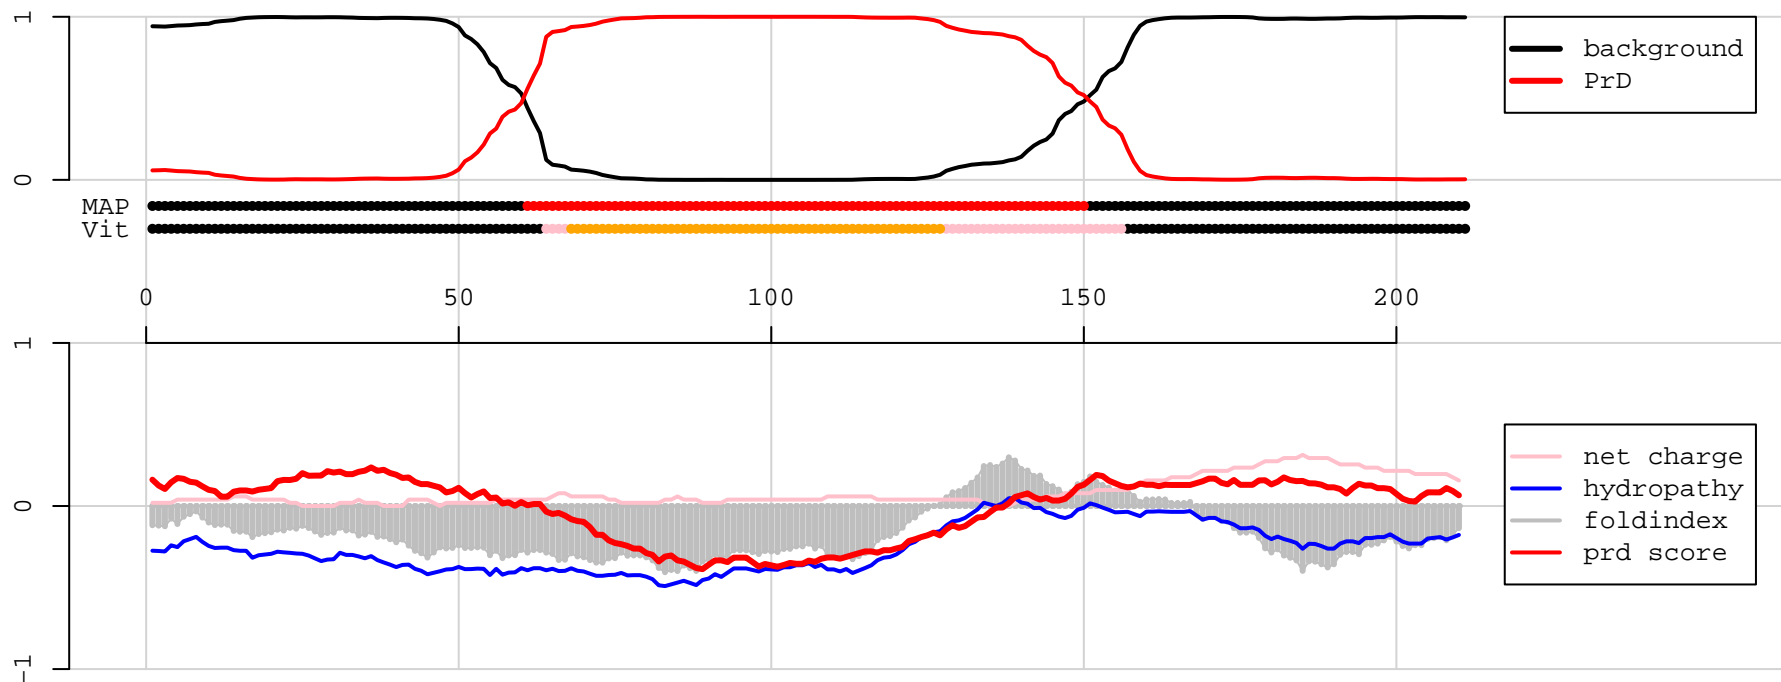

1 MAQSKSNPPQVPSGWKAVFDDEYQTWYYVDLSTNSSQWEPPRGTTWPRPKGPPPGVNNEKSSROOADOAPPPYSSOSTPOVOAGAOAOOPRYYOPOPOY  
 101 POYPOOORYYPQOAPMPAAAPQOAYYGTAPSTSKGSGHGGAMMGLLGVGAGLLGGAMLEHAFDDHNYDGPDTVVENNYGDDAGGSDGGFDDAGGFDG  
 201 GFDDGFDGSDF

# RGT1

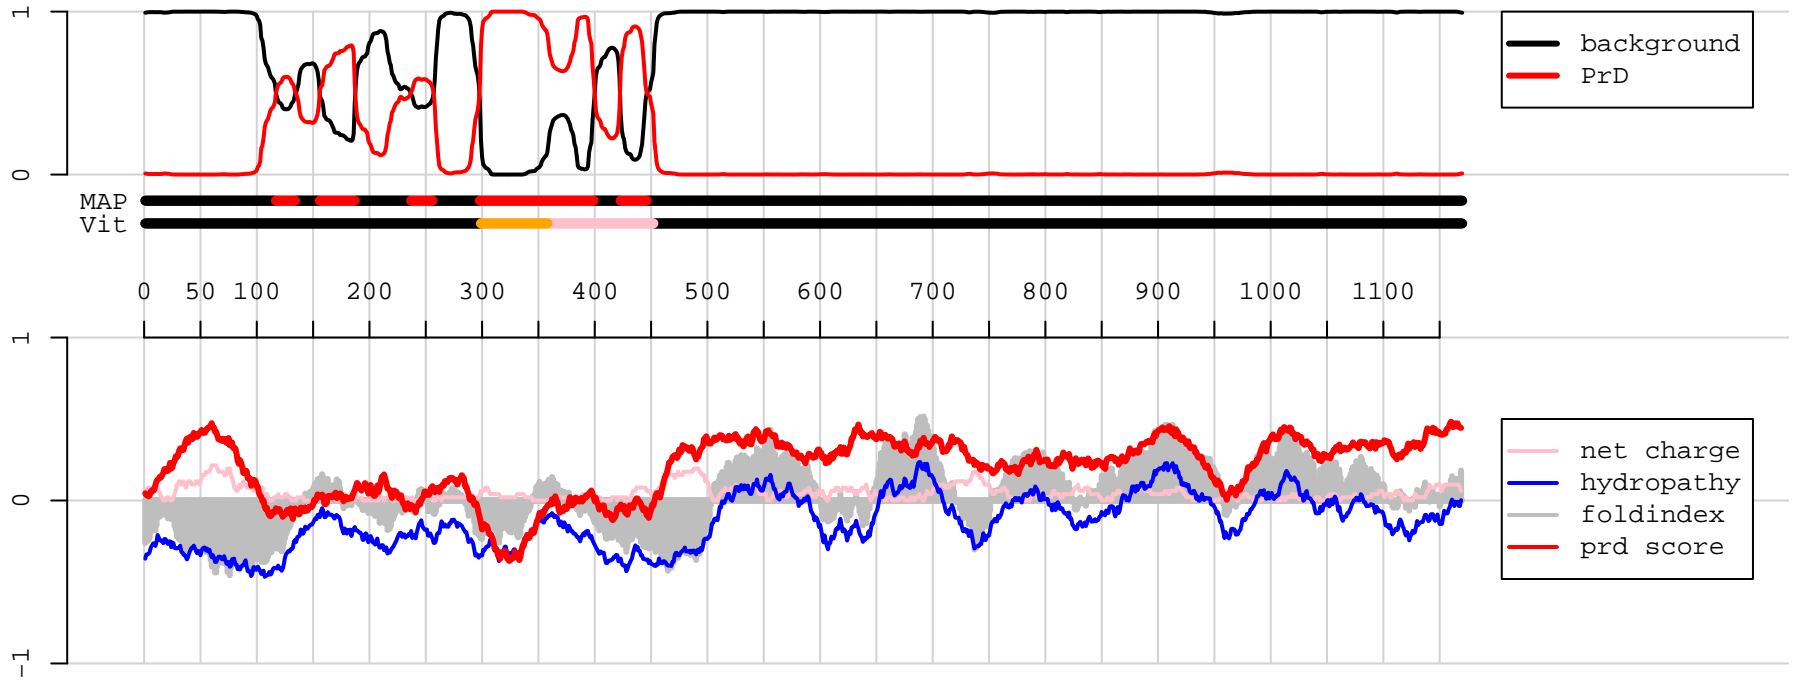

1 MNELNTVSTNSSDSTKNGGTSNSPDDMDSAAAASHAIKKRTKASRACDQCRKKKIKCDYKDEKGVCSNCQRNGDRCSFDRVPLKRGPSKGYTRSTSHPRT  
 101 NEIQDHNNRSYNTFDNSNNTLNNNTGNSGDNGINSNTVPSTPSRSNSVLLPPLTQYIPOAGGIPPSFQNPAIQSTMPAGNIGQQQFWKVPYHEFOHORK  
 201 GSIDSLQSDISVRTLNPNEQLSYNTVQSPITNKHTNDSGNANGSVTGSGSASGSGGYWSFIRTSGLLAPTDDHNGEQTRRSSSIPSLLRNTSNSLLLGG  
 301 QPOLPPPQQSOPQAHOOKLOOGONLYSYSOFSOQOPYNPSISSFGQFAANGFHSROGSVASEAMSPSAPAMFTSTSTNPVNVAQOTORPOGOVPOFSS  
 401 ELDGNKRROSAPVSVTLSTDRLNGNENNNNGEINNNNGSNNSGSSKDTSOHSOESVTTPAALEASSPGSTPQRSTKRRRKSIVSKKTKPKRDSSISITSKD  
 501 SAHPMTTSSTIAYGQISDVLDIDTYEYFIHVGFPPIIPLNKTTLSDLLLNTQPI SNIHEVNSYVILWFRNSLELLVRVALKQKPGGKFFDNIVGVALSP  
 601 SNDNNKAGFTTATARDDAEKTRRDSHNEVDTLLEVQSVFIAALNECFQKIVDIHPKFRENNDQISPKIKVIYLSSTFILLNYYILAFVGYDNSFVLGMSVTI  
 701 FNEFKLYKLLLFPEPDINDVKPPVDEEVSTGNGNTKTSEFEIGSESAGHMNPSNSPNSMDENISHYSVLFKRLYVLLSVFDSLQSCAFGGPKLLNISIQG  
 801 STERFFSNDLGSKWCLEQSQLRLKSVLQSLKLGELMSELTRNRISMNGNRKPGFDITNSSLLSEYVETQPLSVAQLFCKLLIGKHNFINCLLSLYDSEA  
 901 GVYSDLTLDLSSKIADSLCSLISIIQLVLTILRLNPTNSIDFNYPNPANNPTVQEGPSAMGSSPVAGNLSAAPPSEGNPDFYKLLGLKQDTGTIL  
 1001 SDLCRGIISPFAIAILHEVYNITELVKQMPTSLISIMMTATTTQNTQDTKKSQDLVMKLSNSMNEVVQITSVLTMIKPFKIFEHELNKPIMSLTGGLSST  
 1101 TRNDVMWPKSGQGLRESSVMKTLLEDERRTSQTPTTAPVAAEEPRLENVALENFVSI GWKLLDDSELGWY

# ASM4

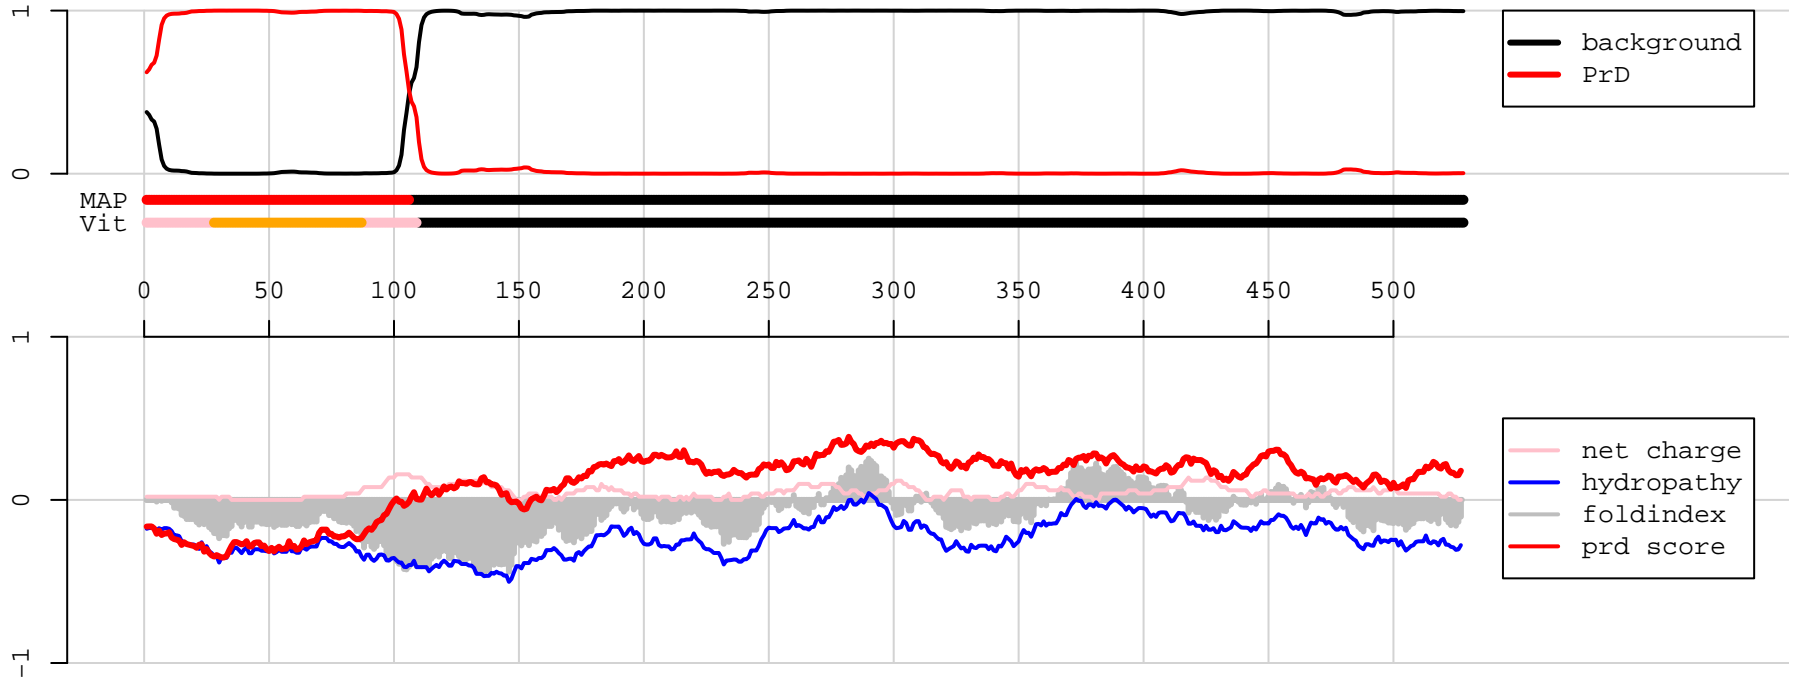

1 MFGIRSGNNNGGFTNLTSOAPOTTOMFOSOSOLOPOPOPOPOOOOHL**OFNGSSDASSLRFGNSL**SNTV**NANNYSSNI**GNNS**INNNNI**KNGT**NNI**SOHGO  
 101 **GNNP**SWV**NN**PKKR**FT**PHTVIRRK**TT**KQNSSDINQND**SS**MNATMR**NF**SKONODSKHNERNK**SAANND**IN**LL**SNFNDIPPSVTLQDWQREDEF**GSIPS**  
 201 LTTQFVTDKY**TAKK**TNRSAYDSK**NT**PNVFDKDSYVRIANIEQNHL**DNNY**NTAET**NN**KVHETSSKSS**LSAI**IVFGYPESISNELIEHF**SHFG**HIMED**FQV**  
 301 LRLGRGINPNT**FR**I**FHN**HDTGCDENDSTVN**KS**ITL**KGR**NNES**NN**KK**YPI**FTGESWVKLT**YN**SPSSALRALQENG**TI**FRGSLIGCIPY**SK**NAVEQLAGCKI  
 401 DNVDDIGEFNVSMYQNS**STS**ST**SNTP**SPPN**VI**ITDG**TLL**REDDNT**PAG**HAGN**PTNI**SSPIVANS**PN**KRLDVIDG**KLP**F**MQ**NAG**PN**SNIP**NLL**RNLES**KMR**  
 501 Q**Q**EAKYRN**NE**PAG**F**TH**KL**SN**WL**FG**W**N**D**L

# PDR1

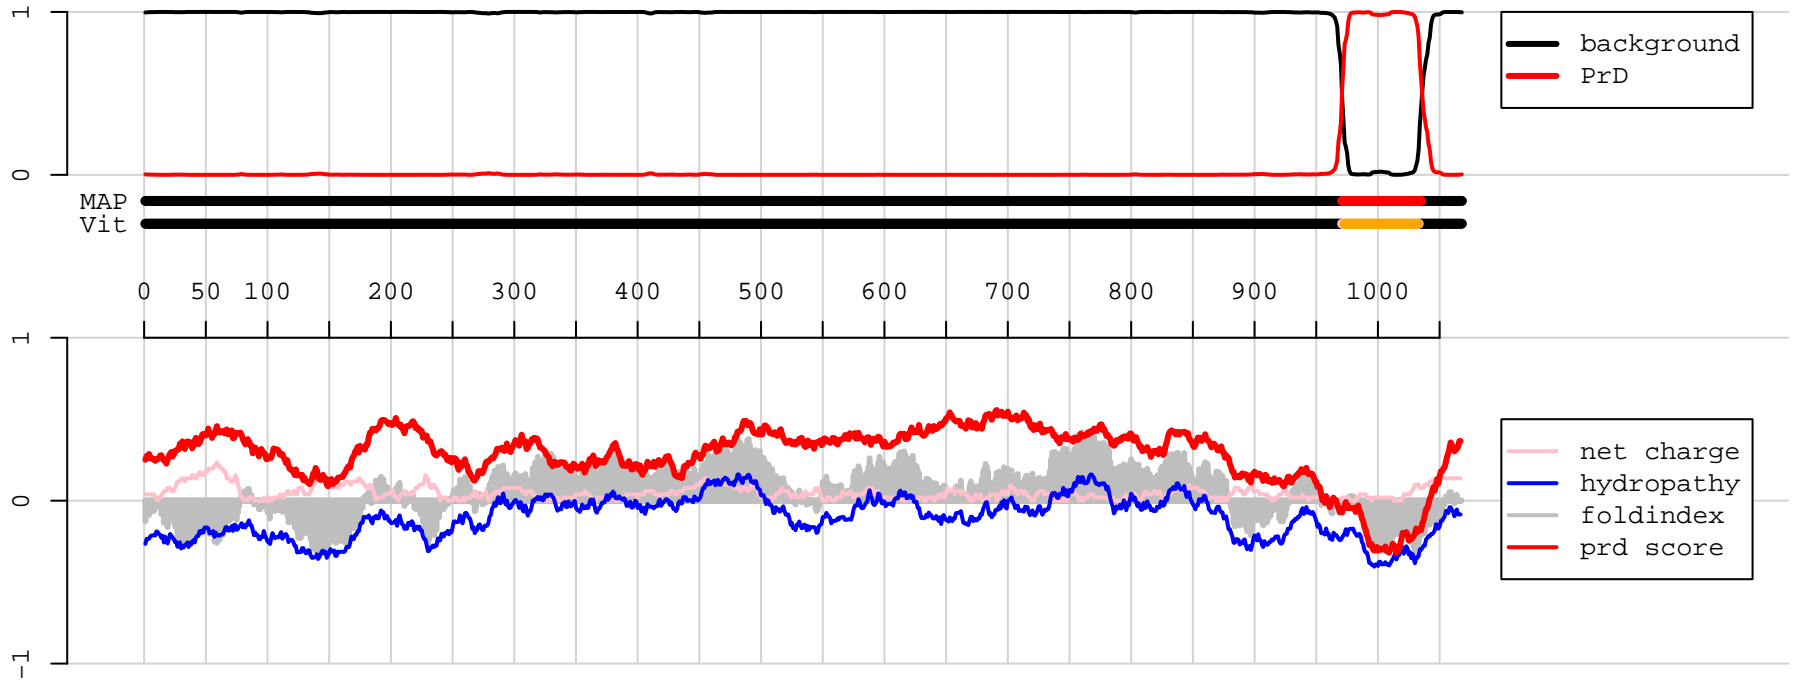

1 MRGLTPKNGVHIETGPDTTESSADSSNFSTGFSGKIRKPRSKVSKACDNCRKRKIKCNGKFPSCASCEIYSCECTFSTRQGGARIKNLHKTSLEGGTTVQVKE  
 101 ETDSSSTSFSPQRCTDGPQCAVEOPTKFFENFKLGGRSSGDNSSGSDGKNDDVDNRNGFYEDDSESOATLTSLOTTLKNLKEMAHLGTHVTSIAIESIELQI  
 201 SDLLKRWEPKVRTKELATTKFYPNKSIETQLMKNKYCDVVHLTRYAAWSNNKKDQDTSSQPLIDEIFGLYSPFQFLSLQIGIGKCFQNYRSKSKCEIFPRT  
 301 AKETIYIMLRFFDVCFHHINQGCVSIANPLENYLQKMNLLPSTPSSISSAGSPNTAHTKSHVALVINHLPQPFVRNITGISNSELLSEMNDISMGILL  
 401 KMLDMHKNSYQNFLMEITSNPSVAKNTQSIDVLQEFIHVCQAGEALIALCYSYNSTLYNYVDFTCDITHLEQLLYFLDLLFWLSEIYGFEKVLNVAVHF  
 501 VSRVGLSRWEFYVGLDENFAERRRNLWKKAFYFEKTLASKLGYPNSIDDSKINCLLPKNFRDVGFLDNRDFIENVHLVRRSEAFDNMCISDLKYYGELAV  
 601 LQIVSHFSSSVLFNEKFTSIRNTSKPSVVRKLLFEVLEIFNETEMKYDAIKEQTGKLFDIASFSDSTELKVSREDKIMASKFVLFYEHFFCRMVNESDN  
 701 IVARLCVHRRPSILIEENLKIYHLKIYKSWTDMNKILLDFDNDYSVYRSFAHYSISCIILVSQAFSVAEFIKVNDVVNMIRVFKRFLDIKIFSENETNEHV  
 801 FNSQSFKDYTRAFSFLTIVTRIMLLAYGESSSTNLDVISKYIDENAPDLKGIIELVLDTNSCAYRFLLEPVQKSGFHLTVSQMLKNRKFOEPLMSNEDNK  
 901 QMKHNSGKLNLPDLPSLKTGTSCLLNGIESPQLPFNGRSAPSPVRNNSLPFAQLPSFRSLSVSDMINPDYAOPTNGONNTOVOSNKPINA000IPTSVQ  
 1001 VPFMNTNEINNNNNNNNNNNKNNINNNNNNNNNNFSAATSNLGLTLDLDEFVNNGLDLEDLYSILWSDVYPDS

## URE2

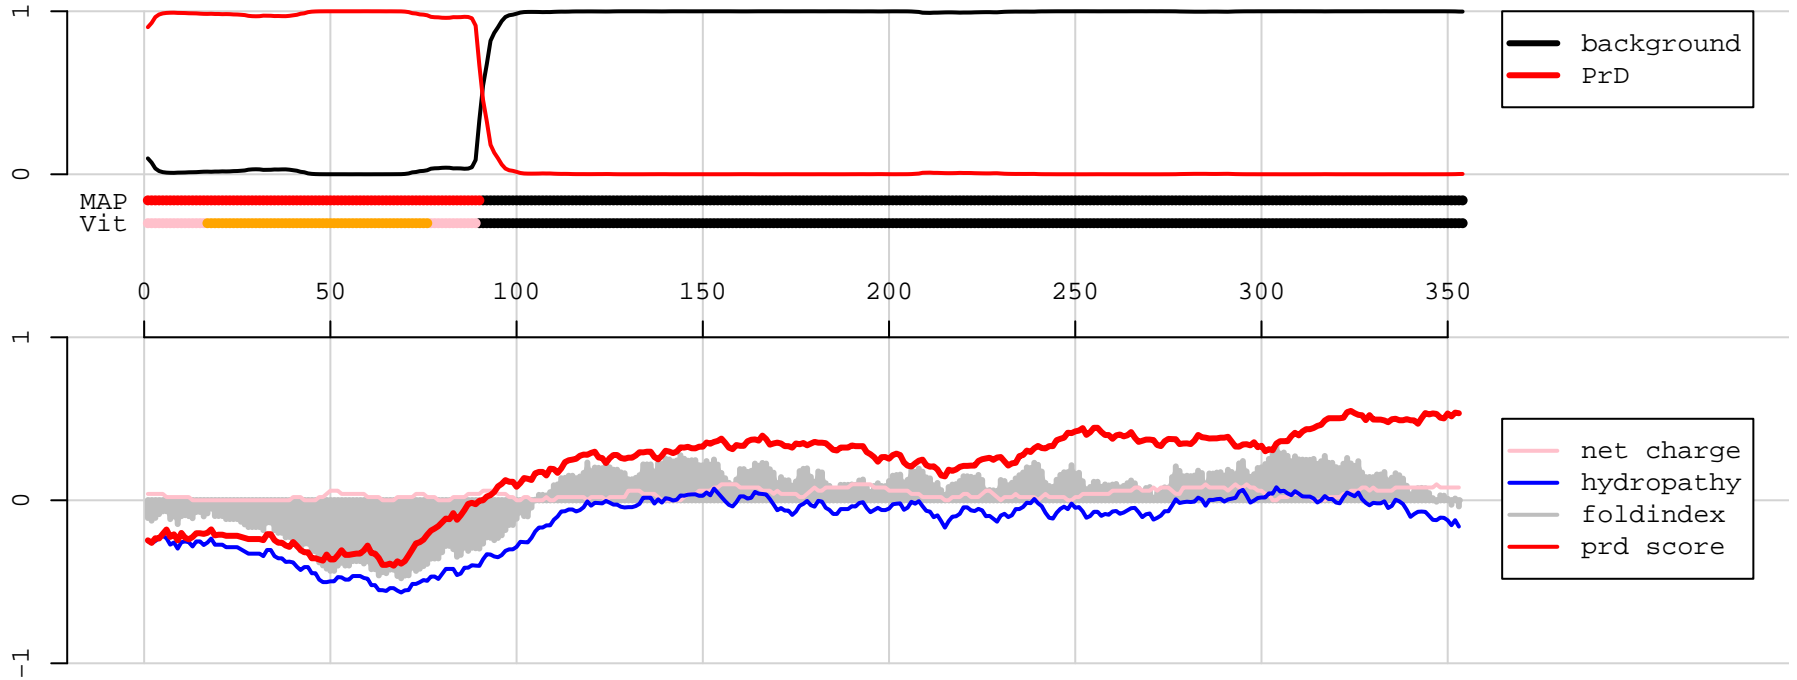

1 MMNNNGNOVSNLSNALROVNIGNRNSNTTTDOSNINFEFSTGVNNNNNNNNSSSNNNNVONNNSGRNGSONNDNENNIKNTLEOHROOOOAFSDMSHVEYS  
 101 RITKFFQEQLLEGYTLF

---

SHRSAPNGFKVAIVLSELGFHYNTIFLDFNLGEHRAPEFVSVNPNARVPALIDHGMDNLSIWESGAILLHLVKNKYKGTGNPL  
 201 LWSDDLADQSQINAWLFFQTSGHAPMIGQALHFRYFHSQKIASAVERYTDEVRRVYGVVEMALAEERREALVMELDTENAAAYSAGTTPMSQSRFFDYPVW  
 301 LVGDKLTIADLAFVPWNNVVDRIGINIKIEFPEVYKWTKHMMRRPAVIKALRGE



# TIF4631

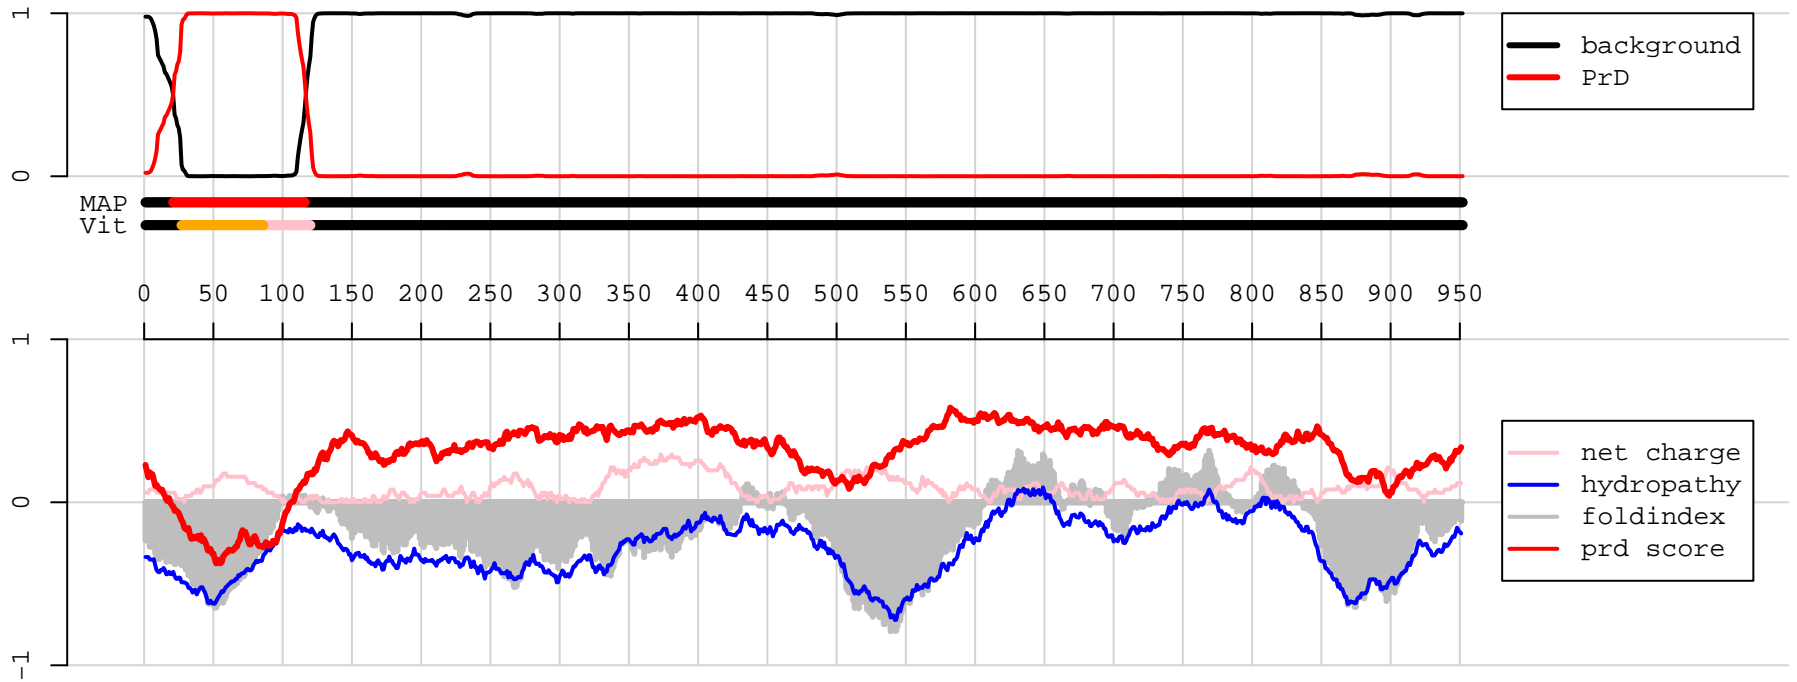

1 MTDETAHPTQSASKQESAALKOTGDDOOESOOORGYTNYNNGSNYTOKKPYNSNRPHOORGGKFGPNRYNNRGNYNGGGSFRGGHMGANSSNVPWTGYYN  
 101 NYPVYYQPQQMAAAGSAPANPIVVEEKSPVPTKIEITTKSGEHLDLKEQHAKLQSOERSTVSPQESKPKETS DSTSTSTPTPTPSTNDSKASSEENIS  
 201 EA EKTRRNFI EQVKLRKAAL EKKRKEQLEGSSGNNNIPMKTTPENVEEKGSDKPEVTEKTKPAEEKSAEPEVKQETPAEEGEQGEKGOIKEESTPKVLTF  
 301 AERLKLKKQOKEREKTEGKENKEVPVQEEETKSAIESAPVPPSEQVKEETEVAETEQSNIDESATTPAIPKTSDEAEAEVEAEAGDAGTKIGLEAEIETT  
 401 TDETDDGTNTVSHILNVLKDATPIEDVFSFNYPEGIEGPDIKYKKEHVKYTYGPTFLLQFKDKLNVKADA EWVQSTASKIVIPPGMGRGNRSRDSGRFGN  
 501 NSSRGHDFRNTSVRNMDDRANSRTSSKRRSKRMNDDRRSNRSYTSRRDRREGSYRNEEKREDDKPKEEVAPLVP SANRWVPKFKSKKTEKKLAPDGKTEL  
 601 LDKDEVERKMKSLLNKLTLEMFD AISSEILA IANISVWETNGETLKAVIEQIFLKACDEPHWSSMYAQLCGKVVKELNPDITDETNEGKTGPKLVLHYLV  
 701 ARCHA EFDKGWTDKLP TNE DGTPLPEMMSE EY YAAASAKRRGLGLVRFIGFLYRLNLLTGKMMFECFRRLMKDLTDS PSEETLESVVELLNTVGEQFET  
 801 DSFR TGQATLEGSQ LLD SLFGILDNI IQTAKISSRIKFKLIDIKELRHDKNWNSDKKDNGPKTIQQIHEEEERQRLKNNRSNSRRTNNSNRHSFRRD  
 901 APPASKDSFITTRTYSQRNSQRAPPPKEEPAAPTSTATNMF SALMGESDDEE

# SLA1

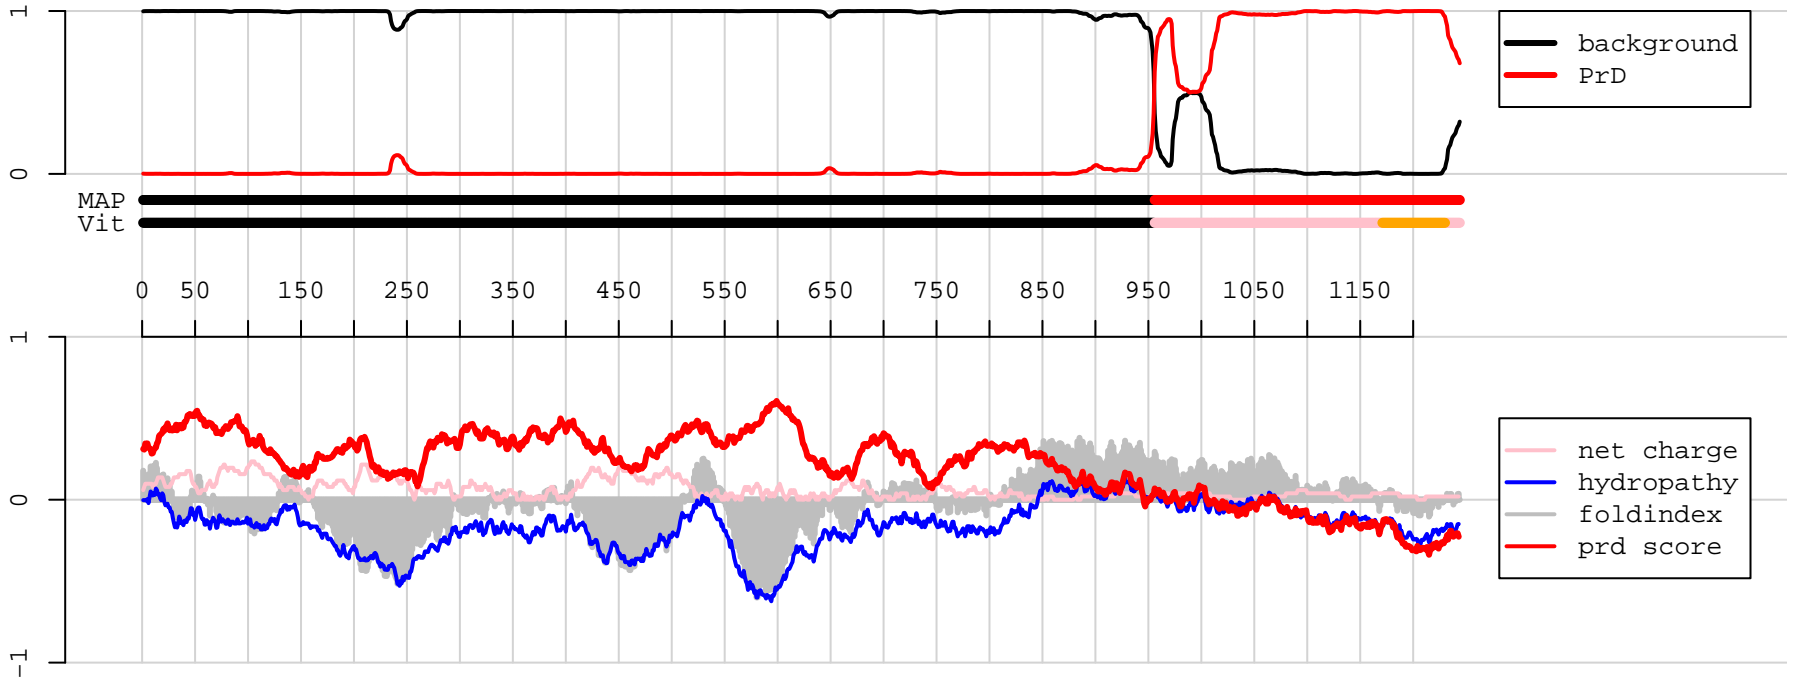

1 MTVFLGIYRAVYAYEPQTPEELAIQEDDLLYLLQKSDIDDWWTVKKRVIGSDSEEPVGLVPSTYIEEAPVLKKVRAIYDYEQVONADEELTFHENDVFDV  
 101 FDDKDADWLLVKSTVSNEFGFIPGNYVEPENGSTSKQEAPAAAEAPAATPAAAPASA AVLPTNFLPQQHNDRARMMQSKEDQAPDEDEEGPPPAMPAR  
 201 PTATTETTTDATAA AVRSRTRLSSYSDNDNDDEEDDYYSNSNNVGNHEYNTEYHSWNVTEIEGRKKKKAKLSIGNNKINFIPOKGTPEHWSIDKLVSYDN  
 301 EKKHMFLEFVDPYRSLELHTGNTTTCEEIMNII GEYKGASRDPGLREVEMASKSKKRGIVQYDFMAESQDELTIKSGDKVYILDDKSKDWWMCQLVDSG  
 401 KSGLVPAQFIEPVRDKKHTTESTASGIKSIKKNFTKSPSRSRSRSRKSNANASWKDDELQNDVVGSAAGKRSRKSLSHKKNSSATKDFPNPKKSRLW  
 501 VDRSGTFKVDAEFIGCAKGIHLHKANGVKIAVAADKLSNEDLAYVEKITGFSLEKFKANDGSSSRGTDSDRDSERERRRRRLKEQEERDRRLKERELYE  
 601 LKKARELLDEERSRLOEKELPIKPPRPTSTTSVPNTTSVPPAESSNNNNSSNKYDWFEEFLNCGVDVSNCRQRYTINFDREQLTEDMMPDINNSMLRTL  
 701 LREGDIVRVMKHLDDKFGRENIASIPTNATGNMFSQPDGSLNVATSPETSLPQOLLPOTTSPAQTAPSTSAETDDAWTVKPAKSESNLLSKKSEFTGSM  
 801 QDLLDLQPLEPKKAAASTPEPNLKDLEPVKTGGTTVPAAPVSSAPVSSAPAPLDPFKTGGNNILPLSTGFVMMPMITGGDMLPMQRTGGFVVPQTTFGMQ  
 901 SQVTGGILPVQKTGNGLIPI SN TGGAMMPQTTFGAAATVLP LQKTGGGLIPIATTGGAQFPQTSFNVQGOQLPTGSLIPVQKTANGLISANTGVSMPTV  
 1001 QRTGGTMIIPOTSFGVSOOLTGGAMMPTOPONTGSAMMPOTSFN AVPOITGGAMMPOTSFNALPOVTGGAMMPLORTGGALNTFNTGGAMIPOTSFSSOAN  
 1101 TGGFRPOSOFGLTLOKTGGIAPLNONOFTGGAMNTLSTGGVLOOOPOTMNTFNTGGVMOELOMNTFNTGGAMOOPOMMNTFNTDGI MOOPOMMNTFNT  
 1201 GGAMOOPOOOALONOPTGFGFGNGPOOSROANIFNATA SNPFGE

# SLT2

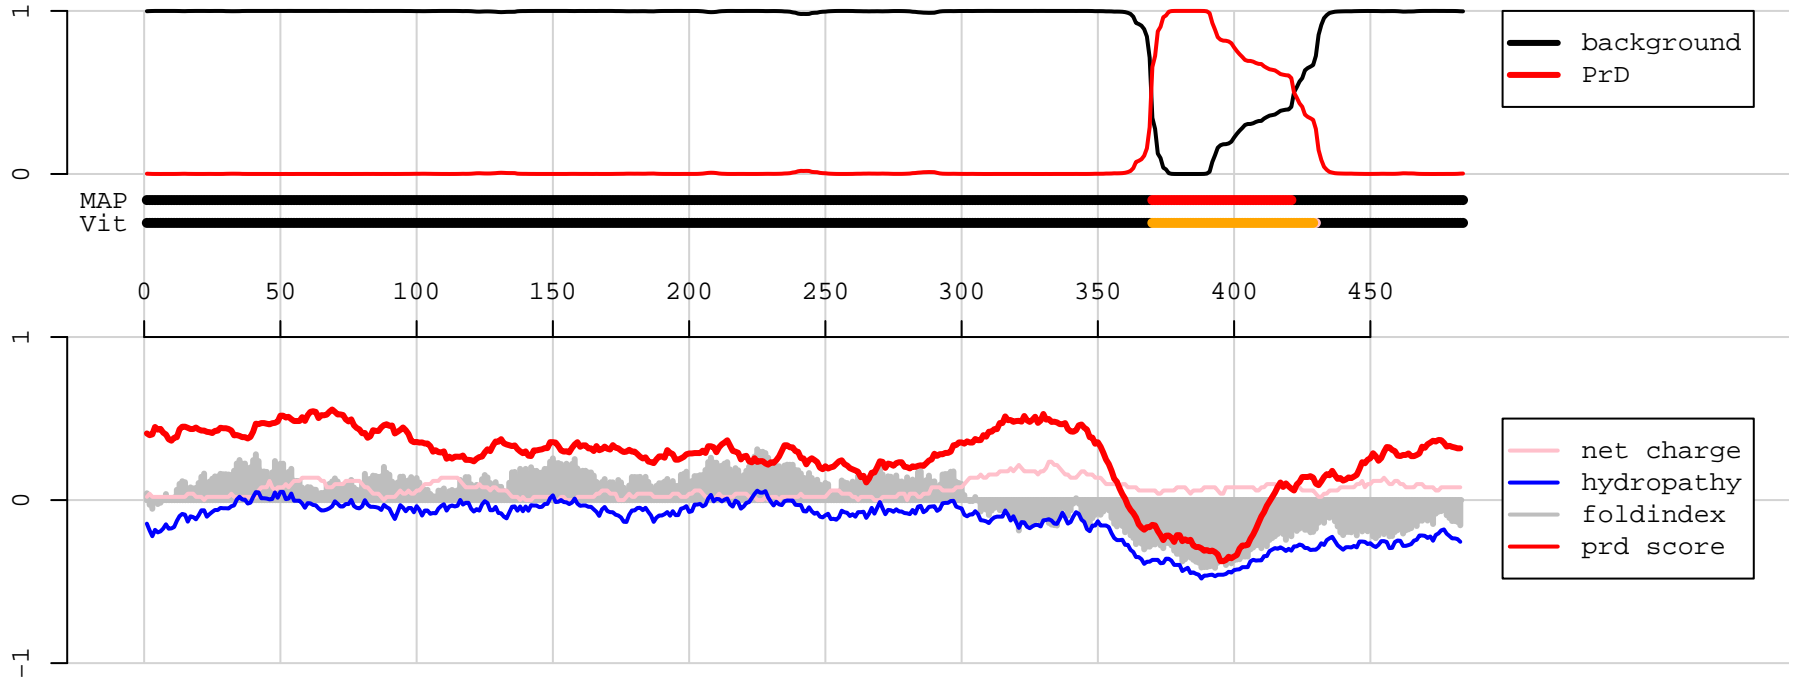

```

1  MADKIERHTFKVFNQDFSVDKRFQLIKEIGHGAYGIVCSARFAEAAEDTTVAIKKVTNVFSKTLCKRSLRELKLLRHFRGHKNITCLYDMDIVFYPDGS
101 INGLLYEELMECDMHQIIKSGQPLTDAHYQSFTYQILCGLKYIHSADVLHRDLKPGNLLVNADCQLKICDFGLARGYSENPVENSQFLTEYVATRKYRA
201 PEIMLSYQGYTKAIDVWSAGCILAFLGGKPIFKGKDYVNQLNQILQVLGTPDETLLRRIGSKNVQDYIHQLGFIPKVPFVNLYPNANSQALDLLEQMLA
301 FDPQKRITVDEALEHPYLSIWHDDPADEPVCSEKFEFSFESVNDMEDLKQMVIOEVQDFRLFVROPLLEEOROLOLOOOOOOOOOOOOOOOOOPSDDVDNGNA
401 AASEENYPKOMATSNSVAPQOESFGIHSQNLPRHDADFPPRPQESMMEMRPATGNTADIPPQNDNGTLLDLEKELEFGLDRKYF
  
```

# CLG1

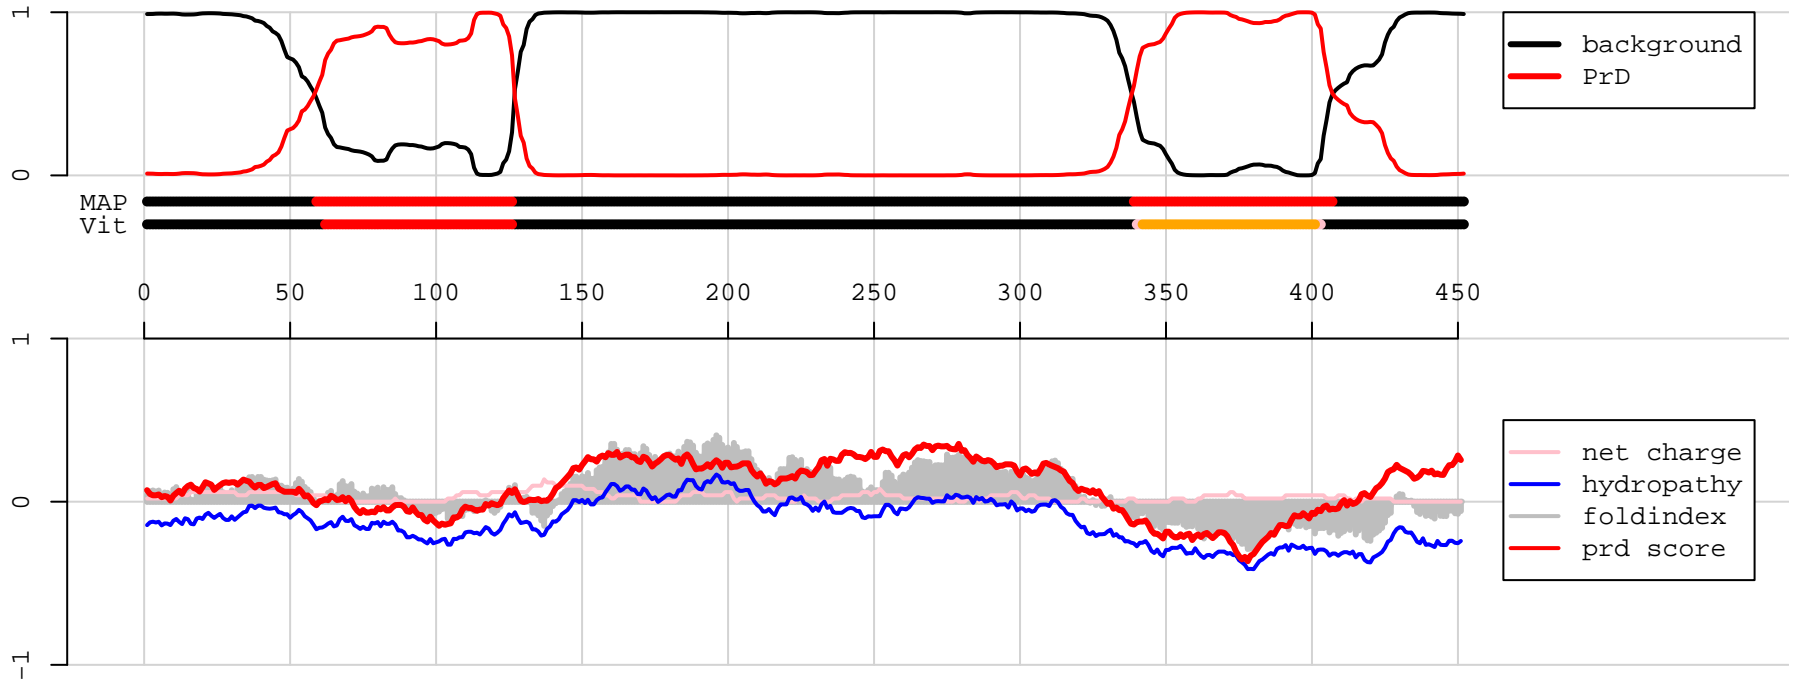

1 MANTFKYYPETMGNSSGYPI SL PFPKGSATS AVNVARQLPKYLGHVPSQS VHTQLPSMASL GYFNQPSSTYYAPPAPLQHQQPPILPPPGLMYTSNNNS  
 101 NVIPPVQMIRDGQQQPQOSNQVNGGVSENLDYDISIMSKFIMENAFVAFNANYSTDDQTDLFFKGISSVLNATRLPSATIFLAIDYLFKYINKLSNGI  
 201 HSI GGNSINI IYQNTMIAFILANKFNDDKTFTNNSWSQATGILINVINDFERQWLRIFNWELYDSAFLYFEFVKNFEIFKQNLKPAVAVPTLLSPIVNV  
 301 GDTRNVNFNLKPTSTNNLLSPVSNYETPMLMPHNMFS SP SYQSNRSRSEFSSMNGYYNYNYNOPRLNYYOQFPNIYSSPISETQFDYDFYNFSSOQQQQQ  
 401 QKQHSLLPAAPQLPPPHVHNQSYGHHLGWKSMDDTINHSRFFERNYFPYSAVY

# SLA2

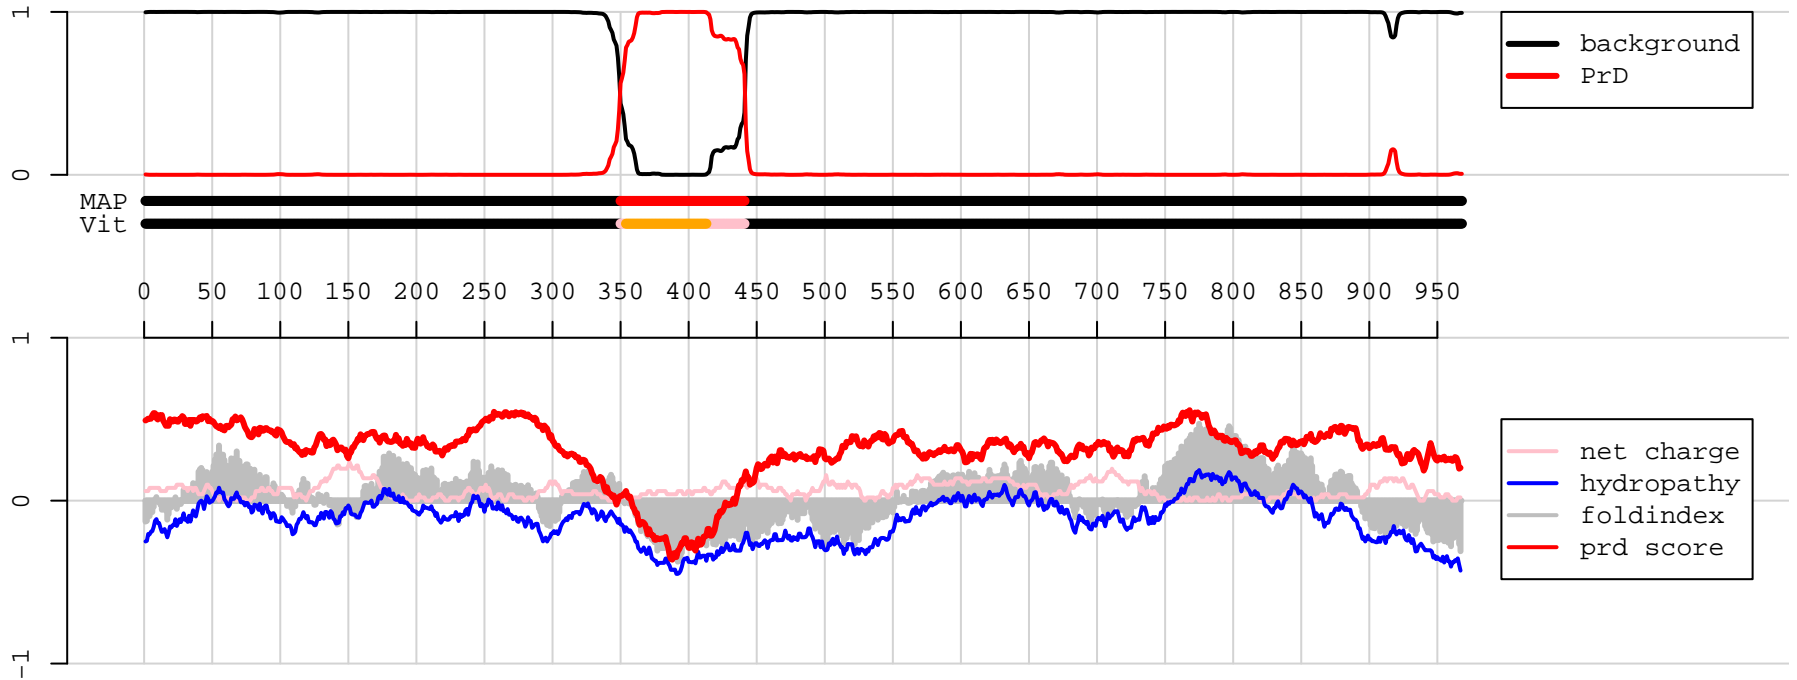

1 MSRIDSDLQKALKKACSV EETAPKRKHVRACIVYTW DHQSSKAVFTTLKTLPLANDEVQLFKMLIVLHKIIQEGHPSALAEAIRDRDWIRSLGRVHSGGS  
 101 SYSKLIREYVRYLV LKLDFAHHRGFNNGTFEY EEEYVSLVSVSDPDEGYETILDLSLQDSLDEFSQII FASIQSERRNTECKISALIPLIAESYGIYKF  
 201 ITSMLRAMHRQLNDAEGDAALQPLKERYELQHARLF EFYADCSSVKYLTTLVTIPKLPVDAPDVFLINDVDESKEIKFKKREPSVTPARTPARTPTPTTP  
 301 VVAEP AISRPVVSQRTTSTPTGYLQTMPTGATTGMMIPTATGARN AIFPQATAQMOPDFWANQQAOFANEONRLEOERVOOLOOOOAOOELFOOOLOKAO  
 401 ODMNMLOOONOHONDLIALTNOYEKDOALLQOYDORVOOLESEIT TMDSTASKOLANKDEQLTALQDQLDVWERKYESLAKLYSOLRQEHLNLLPRFK  
 501 KLQ LKVNSAQESI QKKEOLEHKLKQKDLQMAELVKDRDRARLELERSINNAEADSA AATAAAETMTQDKMNPILDAILESGINTIQESVYNLDSPLSWSG  
 601 PLTPPTFLLS LLESTSENATEFATSFNNLIVDGLAHGDQTEVIHCVSDFSTSMATLVTNSKAYAVTTLPQE QSDQILTLVKRCAREAOYFFEDLMSENLN  
 701 QVGDEEKTDIVINANVDMQEKLOELSLAIEPLLN IQSVKSNKETNPHSELVATADKIVKSSEHLRVDV PKPLLSLALMIIDAVVALVKA AIQCQNEIATT  
 801 TSIPLNQFY LKNSRWTEGLISA AKAVAGATNVLIT TASTKLITSEDNENTSPEQFIVASKEVAASTIQLVAASRVKTSIHSKAQDKLEHCKSDVTDACRSL  
 901 GNHVMGMI EDDHSTSQQOQPLDFTSEHTLTKTAE MEQOQEILKLEQSLSNARKRLGEIRRHAYYNQDDD

# AZF1

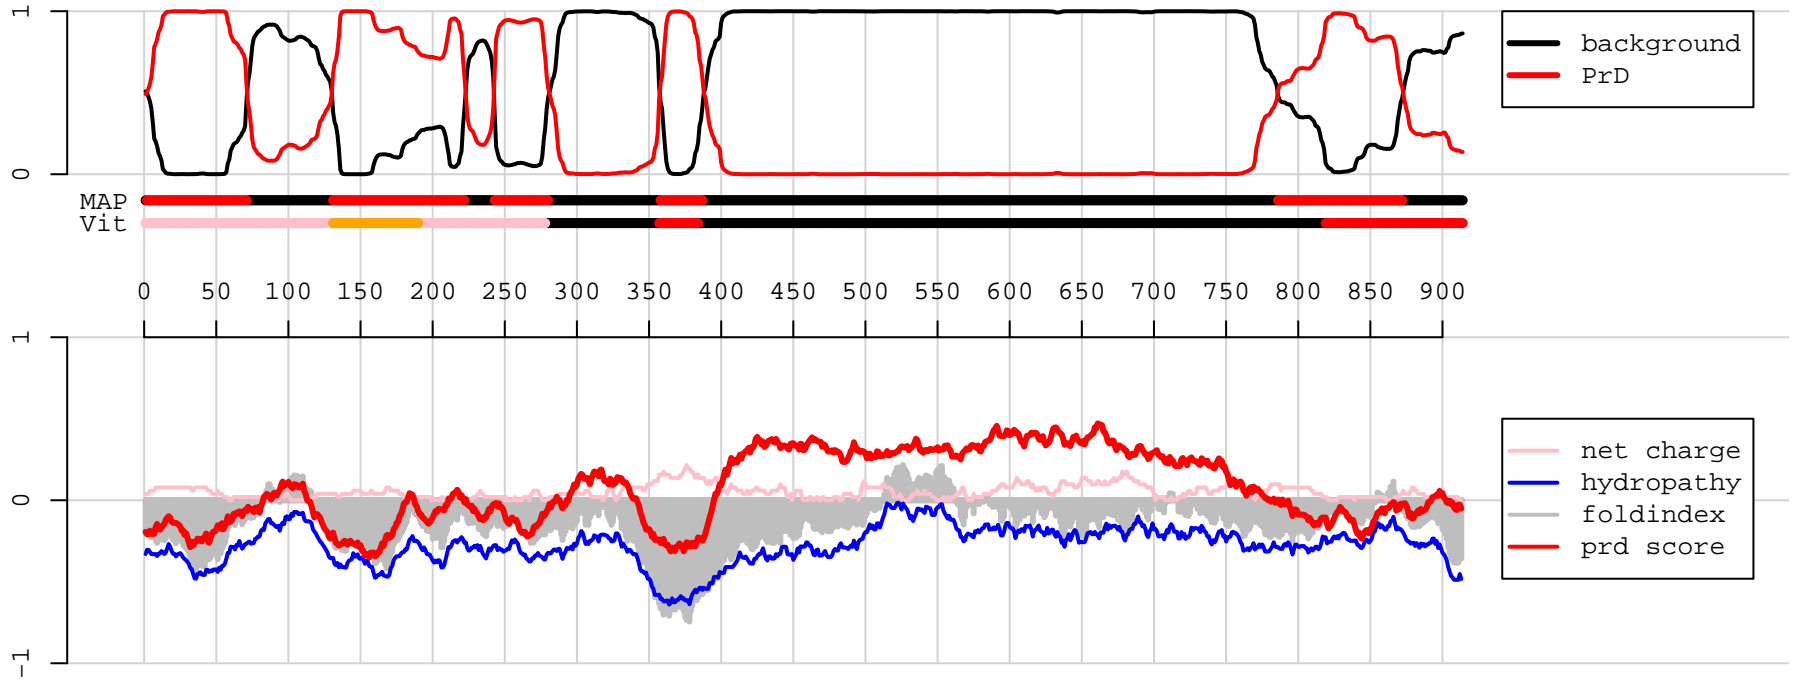

1 MPPPTAOFMGPTOAGONESONOSSGEAGEONOEHGOGPTPILNOSOPASSOPOHOORNESISYTNFNOPRYSTDASINSFLNI SDNPVPTSTGGPSSG  
 101 GAYSNLPRLSTSTHOPPDLSOIGRGFSIVNNLFPOOOOLONOHROOOOOOOSHOPPFPKTPSFSTGLTGSSSOYQFLPRNDNTSQPPSKRNSVYLGP  
 201 NDGPDFEFFSMQOSQOPQFQPSRRESNSMRPPLLIPAATTKSOSNGTNNSGNMNTNADYESFFNTGTNNSNSNONPYFLSSRNNSLKFNPEDDFDFQFKR  
 301 RNSFVRGTLDHSSQNAFIPESRLNSLSVNNKANGDPVADNVTNNMKGKSNEVDNDDGNDSSNNNNNNNNNNNNNNNNNDNNNDNNNDNSINSATSTNIPNOE  
 401 DHSLASTDTTNSNRKDLKEIEQRLRKHLNDEDNYSSAISRPLDKNDVIEGSEGLNKHIDESGMQPNIIKKRKKDDSTVYVKNEMPRTDPPMSKDNSTSAE  
 501 GAAMANFSGKEPPIPDISSVSDDATNLIGATKVDQLMLIIQARKKGFTEKVNTTQDGDLLFNQTMIDILPPKSELVGGVEKPKGTQNTRAVKKHECPYCHR  
 601 LFSQATHLEVHVRSHIGYKPFVCDYCGKRFTQGGNLRTHERLHTGEKPYSCDICDKKFSRKGNLAAHLVTHQKLPFVCKLENCNKTFTQLGNMKAHQNR  
 701 FHKETLNALTAKLAEMNPSENIPLEERQLLEYFASIIYKNSNRGIKGRGKGVGTTKSTISSPENHPASTILNPNTNANNAIANDSENNGNPEGNIDSSSNS  
 801 NPGSHSMISPTQKDMGTLOSQFIQNNFNNSVNSSNPSNOPIINYNNTTLPHSRLGSSSSSNTNNNNNSNFSVGAAPGVLMAPTTNNDFSFNLDQSNDNERS  
 901 QOEQVRFKNINYKS

# SCD6

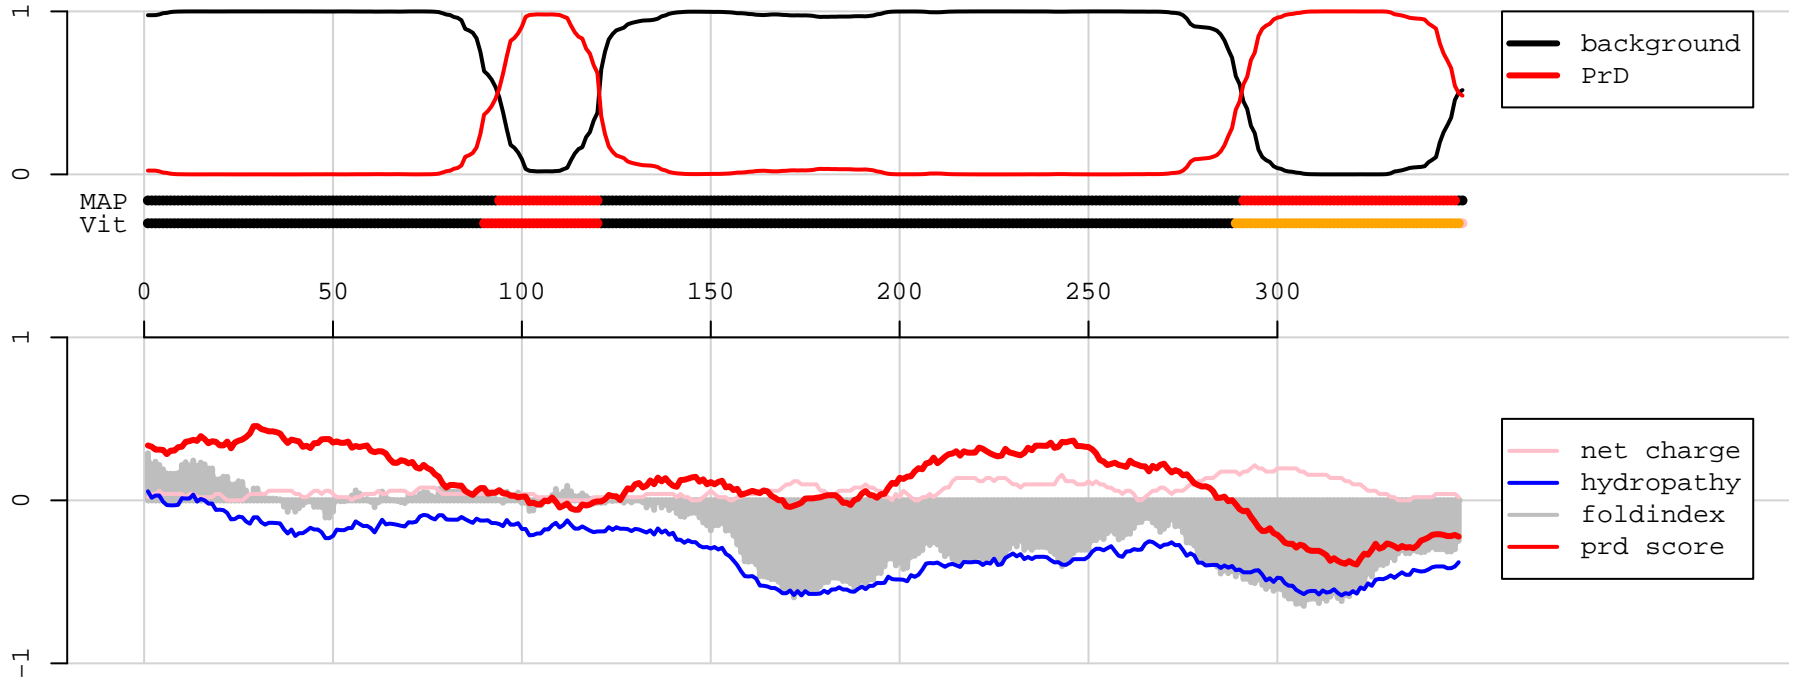

1 MSQYIGKTISLISVTDNRYVGLLEDIDSEKGTVTLKEVRCFGTEGRKNWGPEEIYPNPTVYNSVKFNGSEVKDLSILDANINDIQPVVPQMMPPASQFPP  
 101 QQAQSPQAQAAHVQTNPQVPKPESNVPAAVAGYGYTPTSTETATASMNDKSTPQDTNVNSQSRERGENEPKYQRNKNRSSNRPPQSNRNFKVDI  
 201 PNEDFDQSNNAKFTKGDSTDVEKEKELESVHKQDESDEQFYNNKSSFFDTISTSTETNTNMRWQEEKMLNVDTFGQASARPRFHSRGLGRGRGNRYRGN  
 301 RGNRGRGGGORGNYQNRNNYQNDSGAYQNDSYSRPANOFSOPPSSNVEF

# YAK1

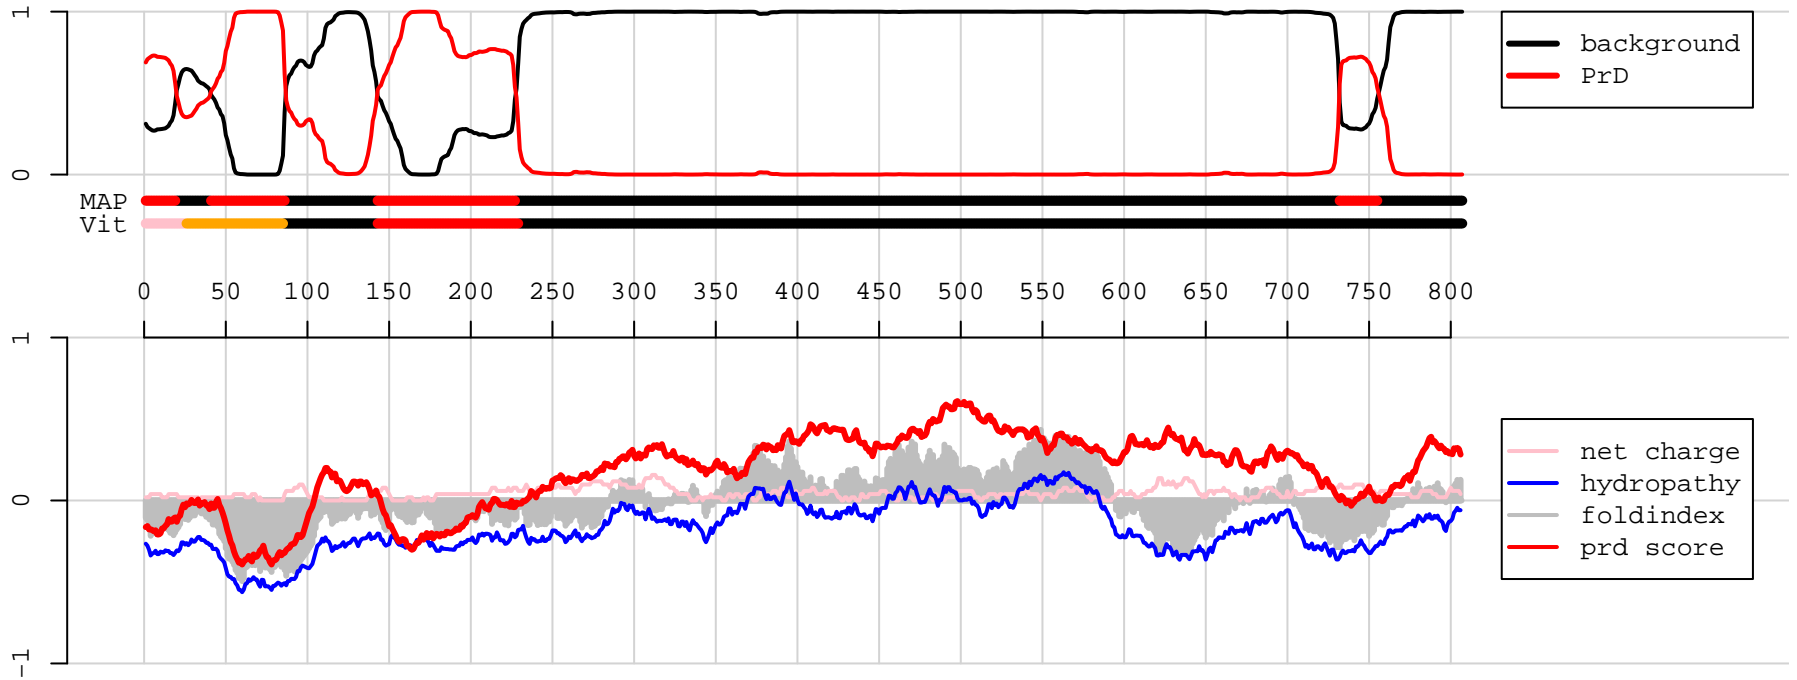

1 MNSSNNNDSSSNSNMNNSLSPTLVTHSDASMGSGRASPDNSHMGRIWNPSYVNOGSORSPOOOHONHHOOOOOOOOOOOONSOFCFVNPWNEEKVTNS  
 101 QONLVYPPOYDDLNSNESLDAYRRRKSSLVVPPARAPAPNPFOYDSYPATSSNTSLAGNSSGOYPSGYQQQQQQOVYOGAIHPSOFGSRFVPSLYDROD  
 201 FORROSLAATNYSSNFSSLNSNTNOGTNSIPVMSPYRRLSAYPPSTSPPLOPPFKLRRDEVOGOKLSIPOMQLCNSKNDLOPVLNATPKFRRASLNSKT  
 301 ISPLVSVTKSLITTYSLCSPEFTYQTSKNPKRVLTKPSEGKCNNGFDNINSDYILYVNDVLGVEQNRKYLVLDILGQTFGVVKCQNLLTKEILAVKVV  
 401 KSRTEYLTQSITEAKILELLNQKIDPTNKHHFLRMYDSFVHKNHLCLVFELLSNNLYELLKQNKFHGLSIQLIRTFTTQILDSLCVLKESKLIHCDLKPE  
 501 NILLCAPDKPELKIIDFGSSCEEARTVYTYIQSRFYRAPEIILGIPYSTSIDMWSLGCIVAELFLGIPIFPGASEYNQLTRIIDTLGYPPSWMIDMGKNS  
 601 GKFMKKLAPESSSTQKHRMKTIEEFCREYNIVEKPSKOYFKRKLPDIIRNYRYPKSIONSOELIDOEMQNRECLIHFLGGVLNLNPLERWTPQQAML  
 701 HPFITKOEFTGEWFPPGSSLPGPSEKHDDAKGOOSEYGSANDSSNNAGHNYVYNPSSATGGADSVDIGAISKRKENTSGDISNNFAVTHSVQEGPTSAFN  
 801 KLHIVEE



# YLR177W

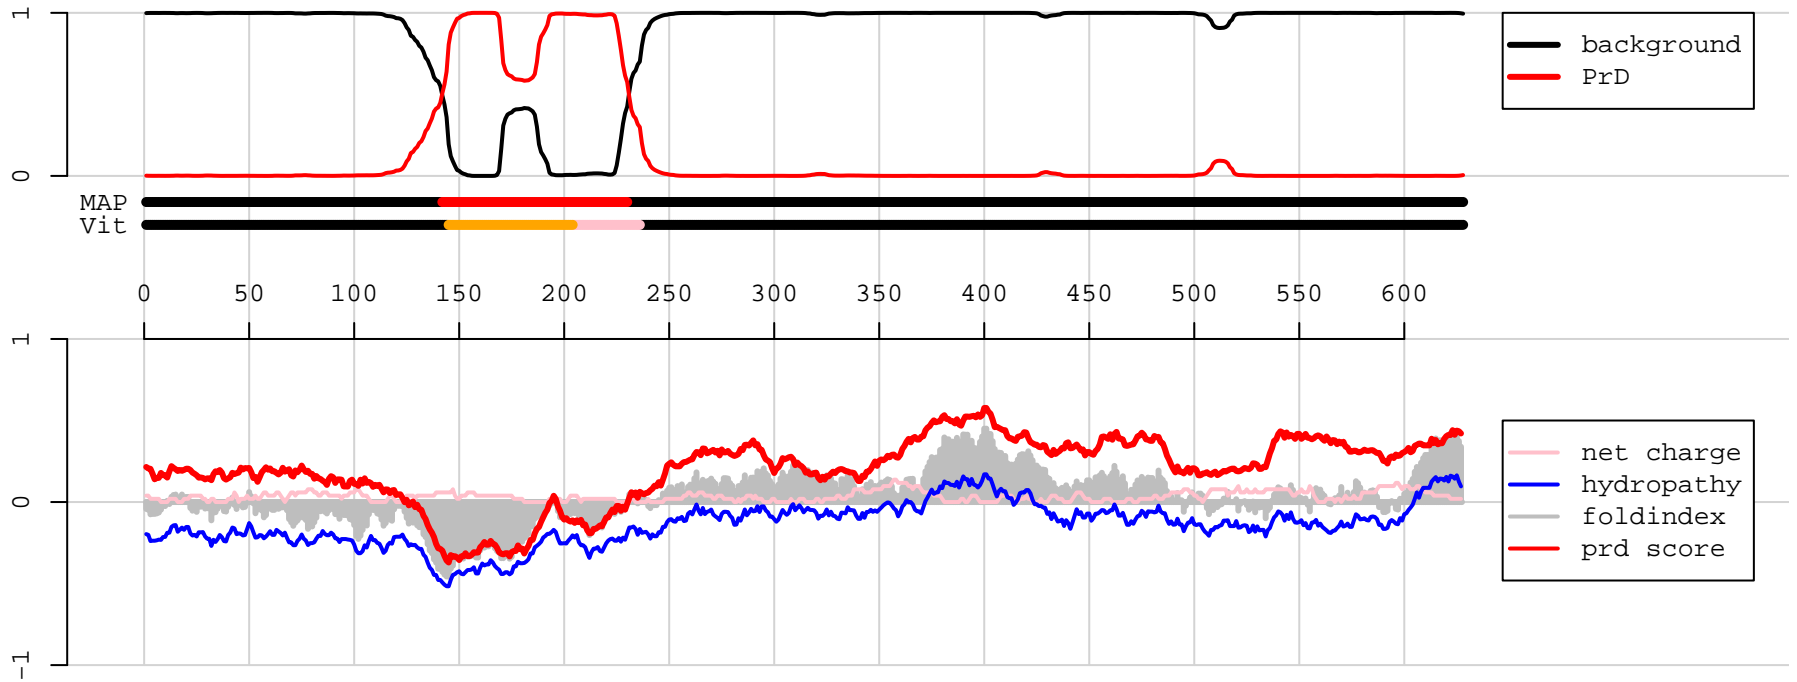

```

1  MELPSINSTTTSISDNQELRNYYDKLLFKNNSGKSLADLPGKMADFNDNSAAAHPRSRVDFINGYIGFREDKQSLLGQKNTKRASFSAFADEGRKQSEMSI
101  NGKSPNLSLFSFEFNGTPTQDRKPYKODYLNVMTSPNNILSPLNNSSOKYYPKOOOOOOOOOOOOOOSIFDPGRRSSYISDALIHGNAATQOPOYSOP
201  VYINNNPSLOVPYTAPSEYTOOOOYSSPFNARRNTQPVLNLHPAAAPTNDAGLAVVDGKNLTSSKELHDLYLDCGSNYFASDKVYKFIDS IKGTLRGDNV
301  SASSRIIEFLDFLKNCNLNYPQSDAFISTAVSNASSTGAAKSKNSTSMHLHYKPLVLVSLKNGKLELLSKPQTATLILKRGDLVIIDGDRGKDLVLVV
401  EPVVDINLALFINFLKKKIHFDLSLITNSQQHFPNDQFIKTLVDTTNGKPVAHELNPKLYDIIELTQLIIPSKQVLRFATPWESSTNLHNKFQDELKALHI
501  AQLKLRSLNNNNSGGGLNIKILNAEFQFDRKKLTFYYICQERNDFRDLIKELFKFYKTRIWLCAIPNNLSIDSKFYDSNKFEWEMYQDMMSHYSMDNTGI
601  VVAPELNRLKLDDDFQIGVYMELVKVLFG
  
```

# CCR4

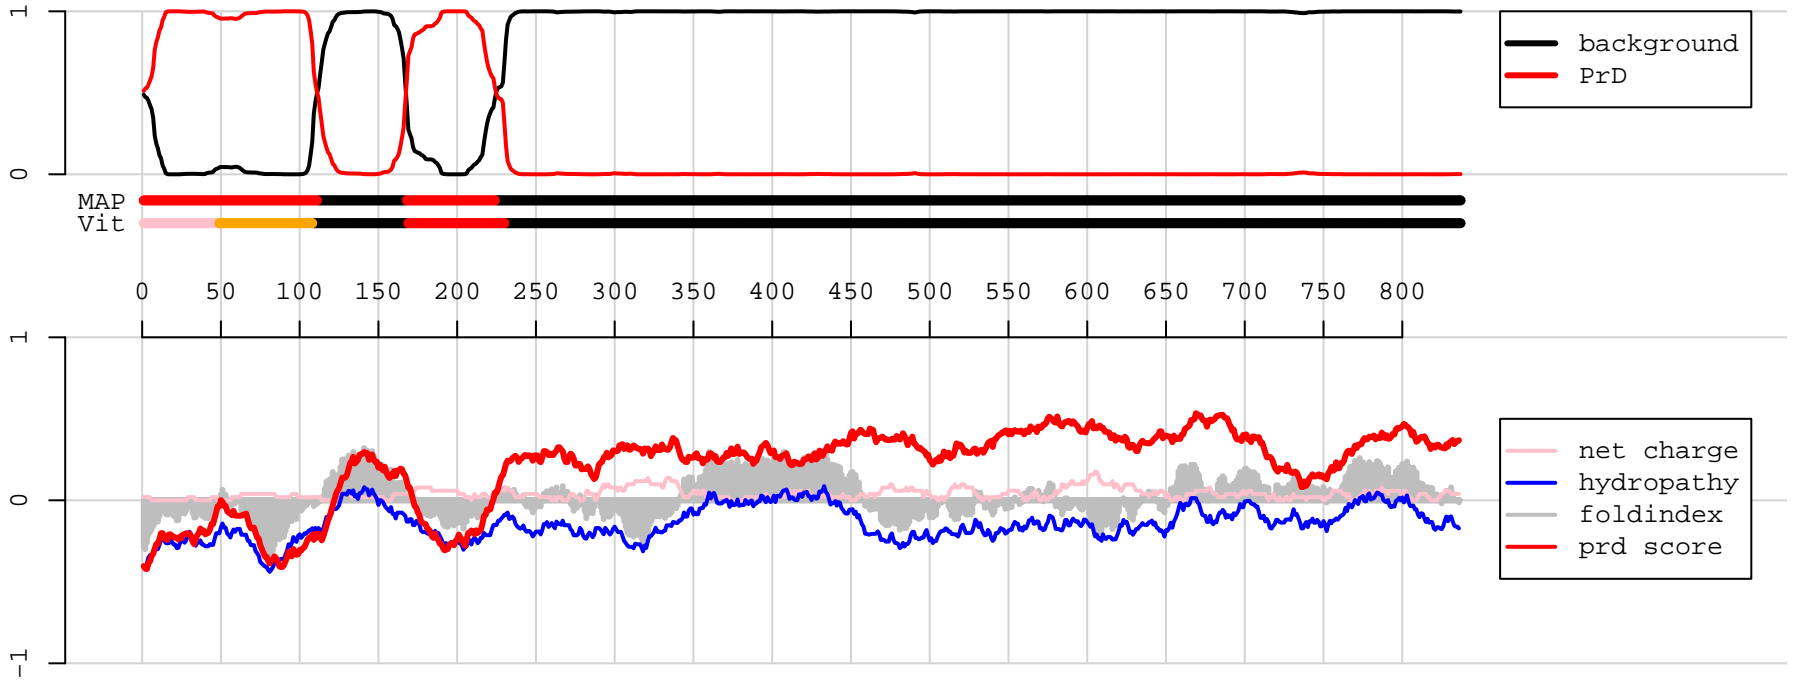

1 MNDPSLIGYPNVGPOOOOOOOOHAGLIGKGTPNALOOOLHMNOLTGIPPPGLMNNSDVHTSSNNNSROLLDOLANGNANMLNMNMDNNNNNNNNNNNN  
 101 NNNGGSGVMMNASTAAVNSIGMVPTVGTPVNINVNASNPLLHPHLDDPSLLNNPIWKLQLHLAAVSAQSLGQPNIYARONAMKKYLATQQAQQAQQAQ  
 201 QQAQOVPGPFGPGQAAPPALQPTDFQQSHIAEASKSLVDCTKQALMEMADTLTDSKTAKKQOPTGDSTPSGTATNSAVSTPLTPKIELFANGKDEANO  
 301 ALLQHKKLSOYSIDEDDDIENRMVMPKDSKYDDQLWHALDLSNLQIFNISANIFKYDFLTRLYLNGNSLTETLPAEIKNLSNLRVLDLSHNRLTSLPAELG  
 401 SCFQLKYFYFFDNMVTTLPWFGNLCNLQFLGVEGNPLEKQFLKILTEKSVTGLIFYLNRDNRPEIPLPHERRFIEINTDGEPOREYDSLQOSTEHLATDL  
 501 AKRTFTVLSYNTLCQHYATPKMYRYTPSWALSWDYRRNKLKEQILSYSDLLCLQEVESEKTFEYEWVPLLDKHGYTGIFHAKARAKTMHKSCKKVDGCC  
 601 IFFKRDQFKLITKDAMDFSGAWMKHKKFORTEDYLNRAMNKDNVALFLKLOHIPSGDTIWAVTTHLHWDPKFNDVKTFQVGVLLDHLETLLKEETSHNFR  
 701 QDIKKFPVLICGDFNSYINSAVYELINTGRVQIHQEGNRDFGYMSEKNFSHNLALKSSYNCIGELPFTNFTPSFTDVIDYIWFSTHALRVRGLLGEVDP  
 801 EYVSKFIGFPNDKFPSDHIPLLARFEFMKTNTGSKKV

# NUP57

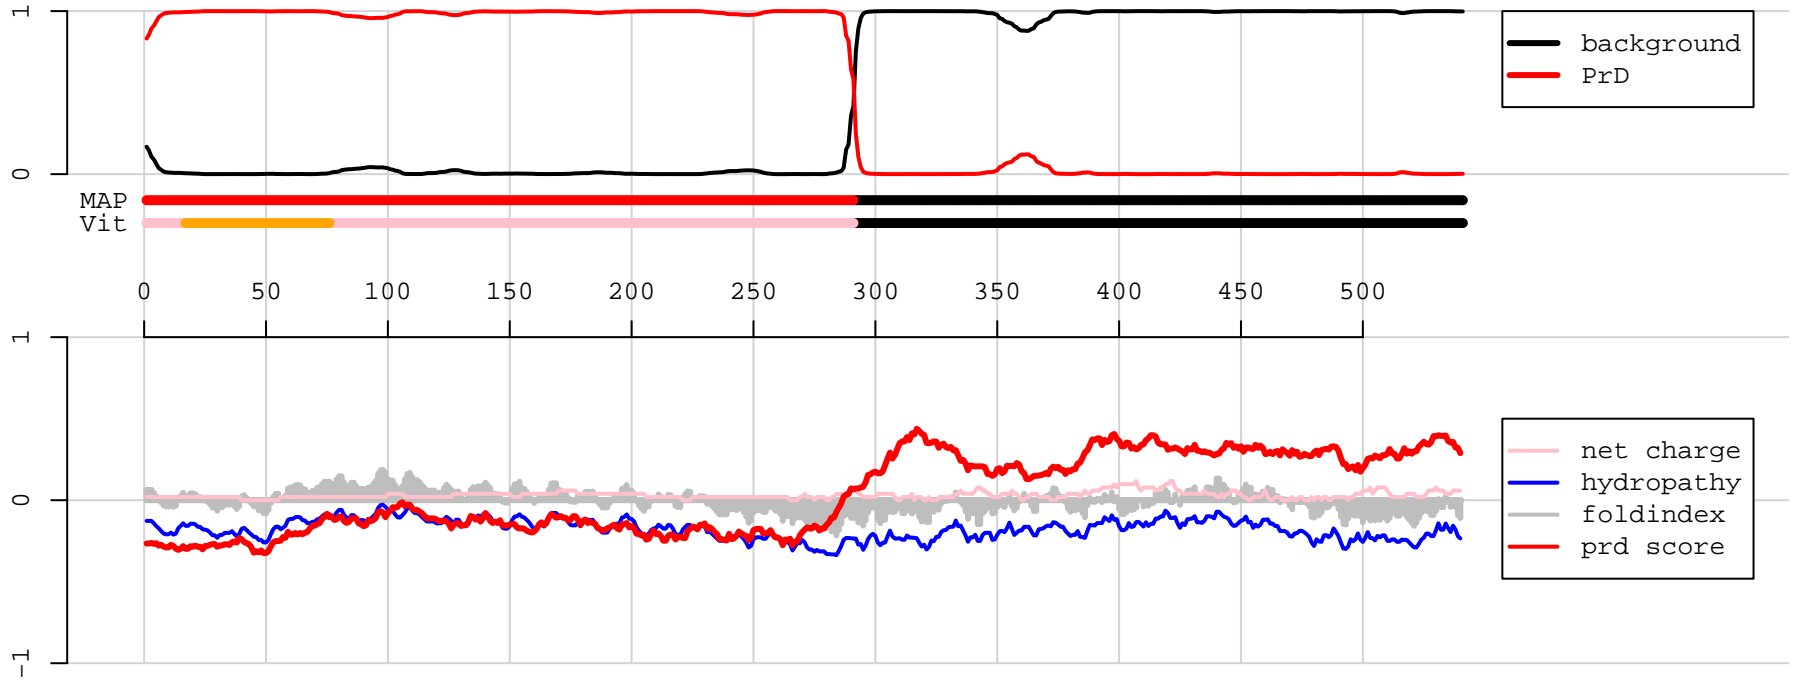

1 MFGFSGSNNGFGNKPAGSTGFSGFONNNNTNTOPASAGFGFGGSOPNSGTATTGGFGANOATNTFGSNOQSSTGGGLFGNKPALGSLGSSSTTASGTTAT  
 101 GTGLFGOOTAPOOSTIGGGLFGNKPTTTTGGFLGNSAONNSTTSGGLFGNKVGTGSLMGGNSTONTSNMNAGGLFGAKPONTTATTGGLFGSKPOGST  
 201 TNGGLFGSGTONNNTLGGGGLFGOSOOPOTNTAPGLGNTVSTOPFAWSKPSGSLNLOOOOOOIOVPLOOTOAIAOOOOLSNYPQOIQEVLKCKESWD  
 301 PNTTKTKLRAFVYNKVNETEAILYTKPGHVLQEEWDOAMEKKPSPOTIPIQIYGFEGLNQRNQVOTENVAQARIILNHILEKSTOLOQKHELDTASRILK  
 401 AQSRNVEIEKRILKLGTLATLKNRGLPLGIAEEKMWSQFQTLQRSEDPAGLGKTNELWARLAILKERAKNISSQLDSKLMVFNDDTKNQDSMSKGTGE  
 501 ESNDRINKIVEILTNOQRGITYLNEVLEKDAAIVKYYKNT

# CAF40

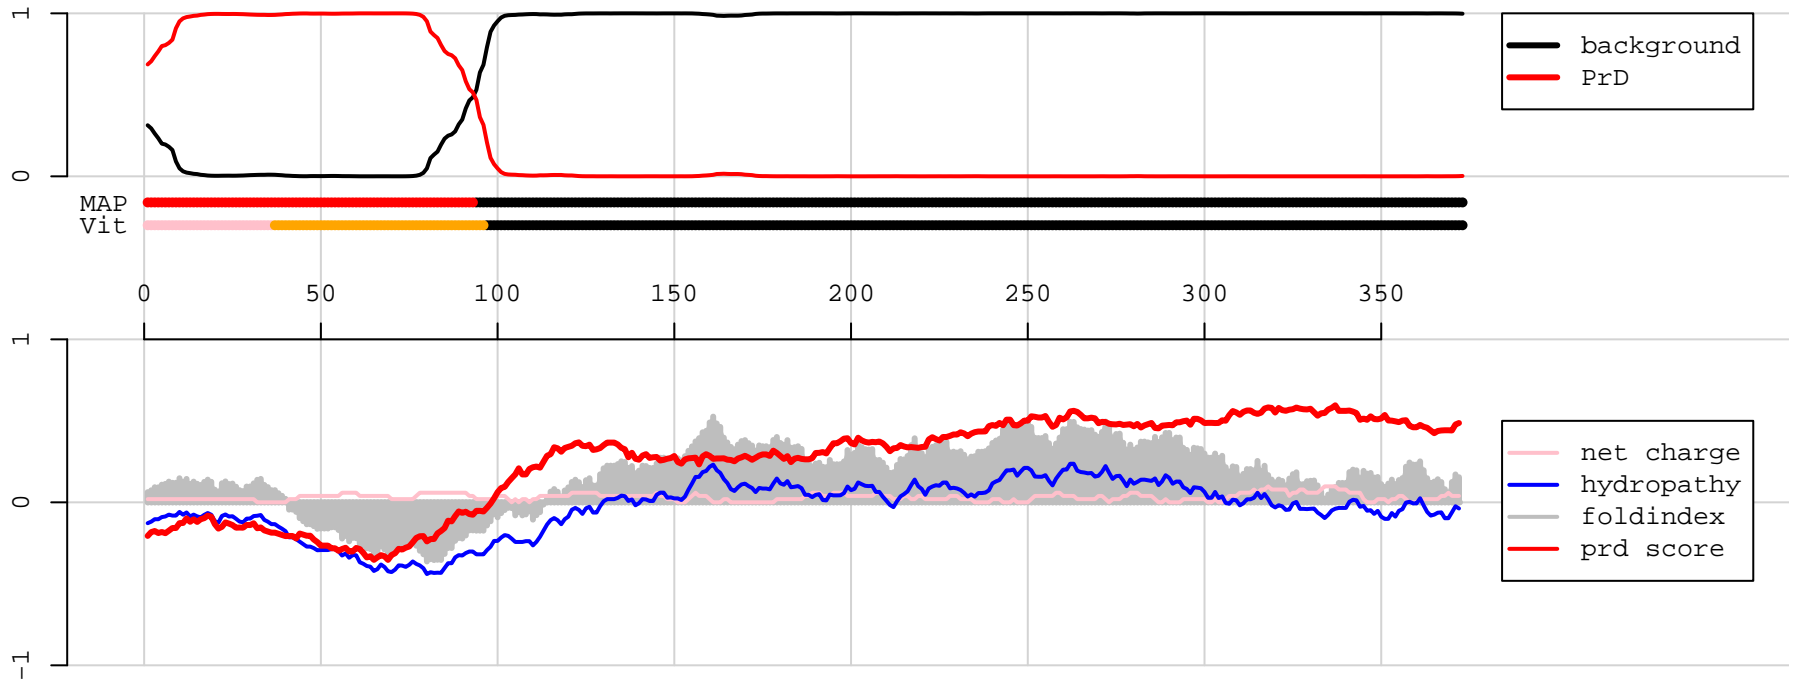

1 MFSAOKPIYGNAGVNMGGGGPSTNNPGSMSMPGVPTSMGPGMNOQIPSGGPMLMGNTPNNNNSNENGENNGNNGNNGNDANATRNNPNMVNNRGAVHA  
 101 LDDPNVYHWICQLTYGPQKEQALLELGRKREQFDDLAVVLWSSFVMTSLLEIIISVYPMLQPQMLSNNLSNRVCNALVLLQCVASHPETKHLFLQAHIP  
 201 LFLFPFLNNTTSRQRTFEYLRRLTSLGVIGALVKNSQDVITFLLRTDIVPLCLRIMESSELSKTVAIFILQKILLDDVGLQYICATLERFYAVTNVLKDM  
 301 VEHLTIVSTPPGRLLKHIIRCYLRLSDDLEARRLLKIVLPAKLRDNTFTEVLRDDVGSKRCLAQLLLLTLNEETS

# SSD1

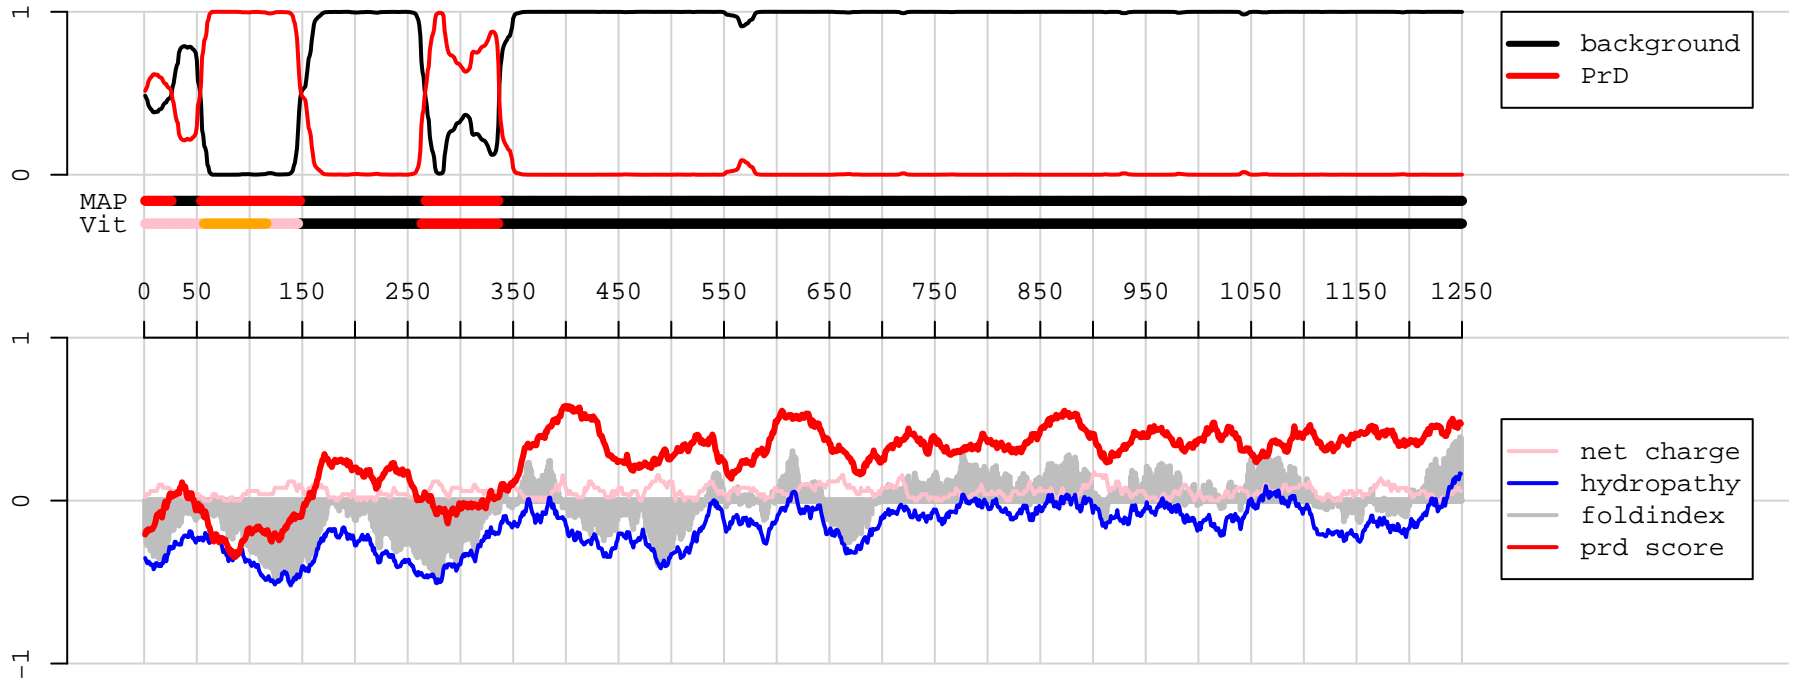

1 MSKNSNVNNNRSOEPNNMFVOTTGGGKNAPKQIHVAHRRSSELTNLMIEOFTLQKOLEOVOA0000OLMA0000LAOOTGOYLSGNSGSSNNHFTPOPPHP  
 101 HYNSNGNSPGMSAGGSRSRTHSRNNSGGYHNSYDNNNNNSNPGSNSHRKTSSOSSIYGHSSRRHSLGLNEAKKAAAEQAKRISGGEAGVTVKIDSVOADS  
 201 GSNSTTEQSDFKFPPPPNAHQHRRATSNLSPPSFKFPNSHGDNDDEFIATSSTHRRSKTRNNEYSPGINSNWRNQSQQPQQQLSPFRHRGSNSRDYNS  
 301 FNTLEPPAIFQOGHKHRASNSSVHSFSSOGNNGGGGRKSLFAPYLPQANIPELIQEGRLVAGILRVNKKNRSDAWVSTDGALDADIYICGSKDRNRALEG  
 401 DLVAVELLVVDDVWESKKEKEEKRRKRDASMOHDLIPLNSSDDYHNDASVTAATSNNFLSSPSSSDSLSKDDL SVRRKRSSTINNDSDLSSTPKSGVRR  
 501 RSSLKQRPQKKNDDVEVEGQSLLLVEEEEINDKYKPLYAGHVAVLDRIPGQLFSGTLGLLRPSQQANSNNDNKPQSPKIAWFKPTDKKVPLIAIPTEL  
 601 APKDFVENADKYSEKLFVASIKRWPITSLHPFGILVSELGDIHDPDTEIDSILRDNNFLSNEYLDQKNPQKEKPSFOPLPLTAESLEYRRNFTDTNEYNI  
 701 FAISELGWVSEFALHVRNNGNGTLELGCHVVVDVTSHIEEGSSVDRRARKRSSAVFMPQKLVNLLPQSFNDEL SLAPGKESATLSVVYTLDSSTLRIKSTW  
 801 VGESTISPSNLSLEQLDEKLSTGSPTS YLSTVQEIARSFYARRINDPEATLLPTLSLLES LDDEKVKVDL NILDRTLGFVVINEIKRKVNSTVAEKIYT  
 901 KLGDLALLRRQMOP IATKMASFRKKIQNFGYNFDTNTADEL IKGVLKIKDDDV RVGIEILLFKTMPRARYFIAGKVD PDQYGHYALNLP IYTHFTAPMRR  
 1001 YADHVVHRQLKAVIHDTPTYTEDMEALKITSEYCNFKKDCAYQAQEQAIHLLLCKTINDMGNTTGQLLTMATVLQVYESSFDVFIPEFGIEKRVHGDQLPL  
 1101 IKA EFDGTNRVLELHWQPGVDSATFIPADEKNPKSYRNSIKNKFRSTAAEIANIELDKAESEPLISDPLSKELSDLHLTVPNLRLPSASDNKQNALEKF  
 1201 ISTTETRIENDNYIQEIHELQKIPILLRAEVMALPCLTVRALNPFMKRV

# NRD1

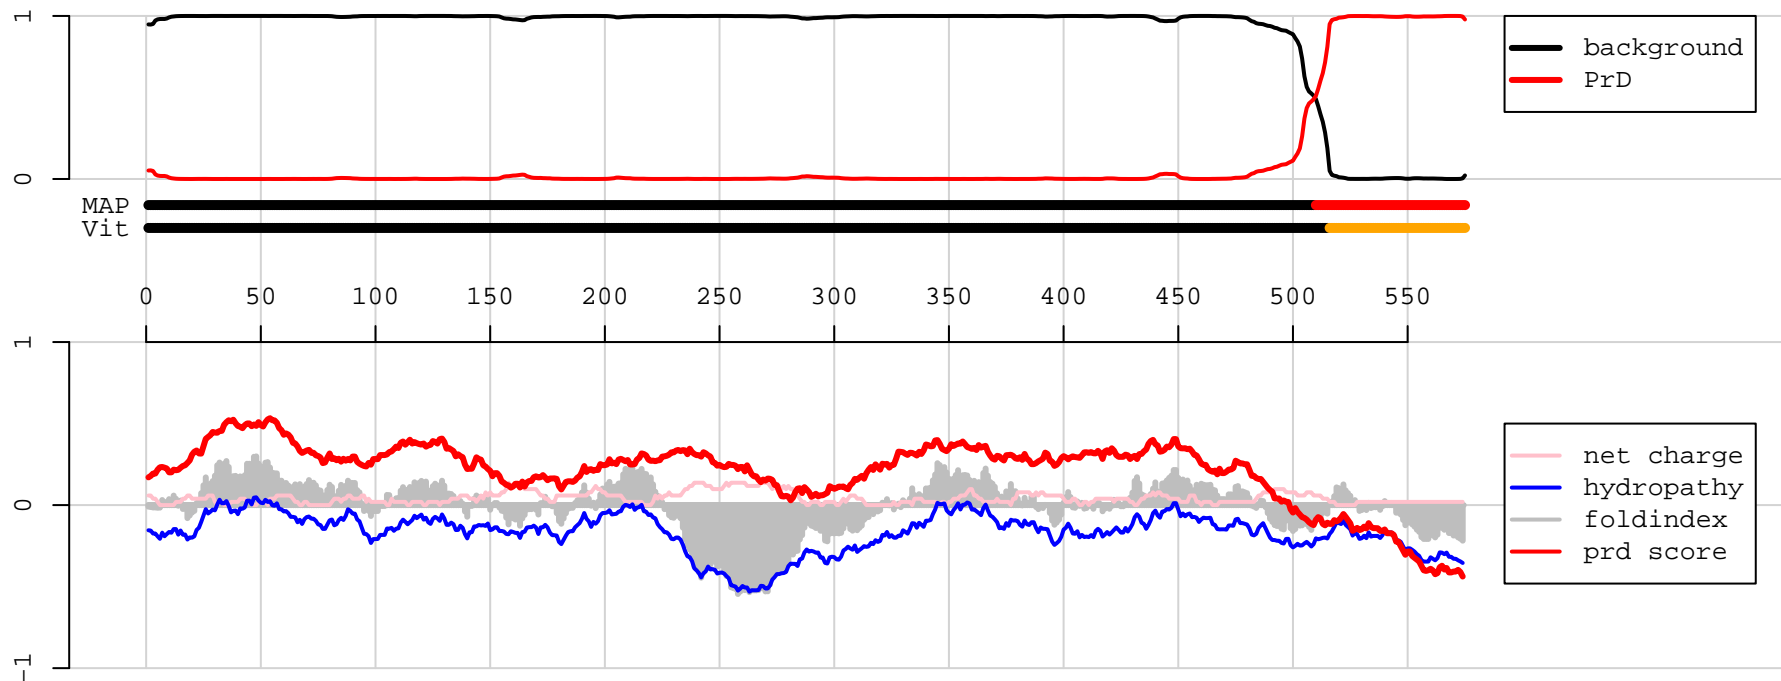

```

1  MQQDDDFQNFVATLESFKDLKSGISGSRIKKLTTYALDHIDIESKIIISLIIDYSRLCPDShKLGSLYIIDSIGRAYLDETRSNsNSSSSNKPGTCAHAINT
101 LGEVIQELLSDAIAKSNQDHKEKIRMLLDIWRSGLFQKSYLNAIRSKCFAMDISNNTANTASQQLSLDPKQRSKQILSNLKKSPPLNLNISLPTDLTST
201 DPAKQQAALFQVIAALQKHFKTLPshTSVgTVAPPQAHTITEYGSRRERERERERERYNSRRNRSRSPpAPFSQPSTGRKDRYPSVAQDOYSIGAPNTTFGT
301 NNHhLYPDELNVsNNPHYRpkPVSYDSTLPPDHIKVYSRTLFiGGVPLNMKEWDLANVLKPFaEVQSVILNNSRKHAFVKVYSRHEAENVLQNFNKDGAL
401 PLRTRWGVGFGRDCCDYQHGYsIIPMhRLTDADKKWSVSAQWGGTSGQPLVTGIVFEEDiIVGEGVSSKAI SQKMPTDSGRNGPRSGKPNKSGSISsI
501 SPVPYGNAPLASPPPOOYVOPMMOOPYGYAPNOPLPSOGPAAAAPPVPOOOFDPTAOLNSLMNMLN00000000S

```

# NGR1

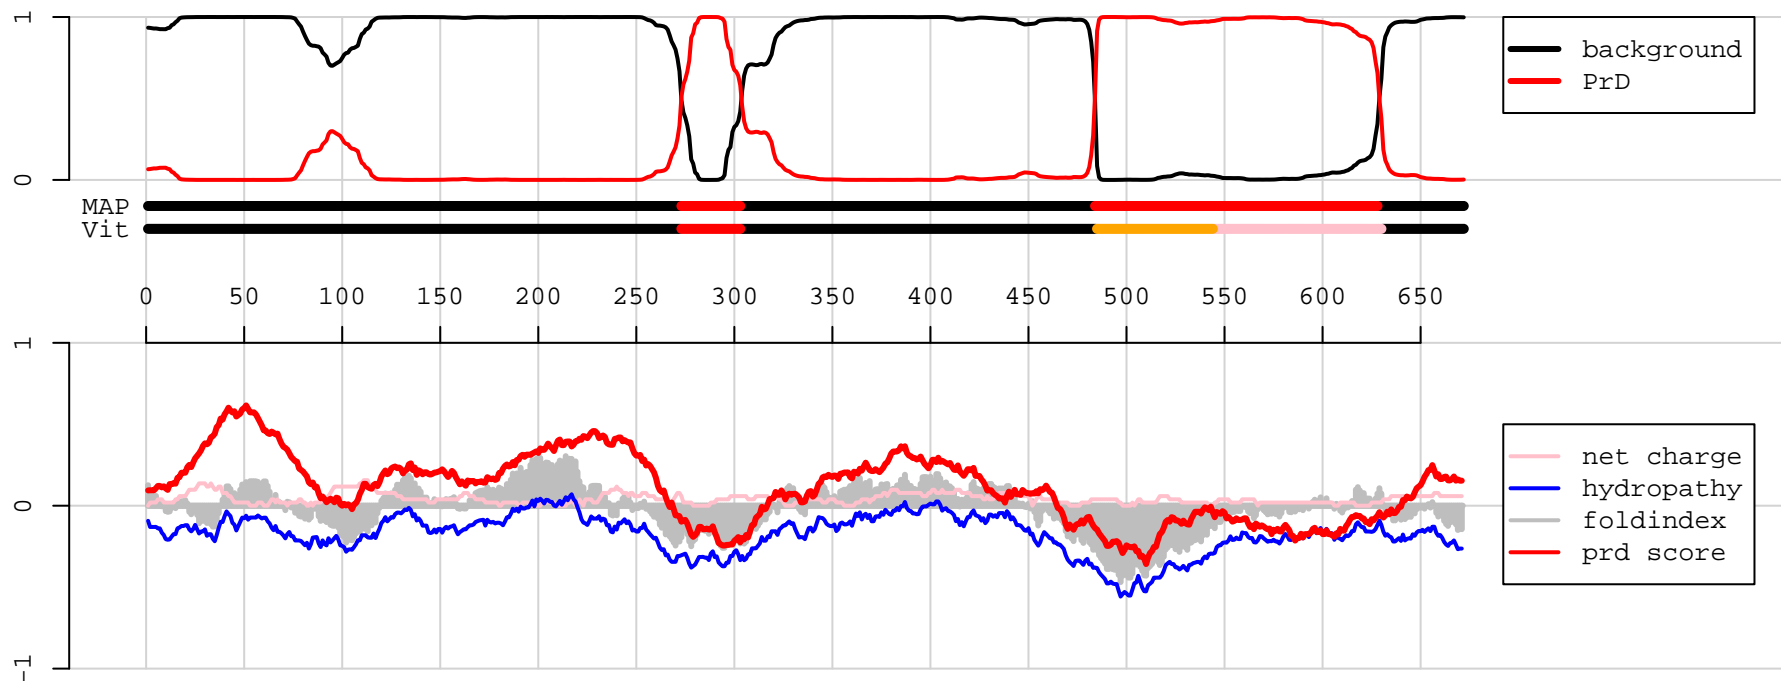

1 MMSNVANASQRQENPYI I PLPPSSTVETSTEPRTLWMGDLDPSPFDEATIEE I WSKLDKKVIVK LIRAKKNLLIPCSSTSSSNNTSEENAENQOSASNS  
 101 TDQLDNSQMININGISFIDPSTTQLHHAGYCFVEFETQKDAKFALSLNATPLPNFYSPPTNSQTNPFTKRTFRLNWASGATLQSSIPSTPEFSLFVGDLS  
 201 PTATEADLLSLFQTRFKSVKTVRVMTDPLTGSSRCFGFVRFGEDEERRALIEMSGKWFQGRALRVAYATPRNNMMLLOEQEQEQEQEQLOOQHOOQDOED  
 301 NNGPLLIKTANNLIQNNSNMLPLNALHNAPPMHLNEGGISNMRVNDSLPSNTYNTDPTNTTVFVGGGLVPKTTTEFQLRSLFKPFGPILNVRIPNGKNCGFV  
 401 KFEKRIDAEASIQGLQGFIVGGSPIRLSWGRPSSSNAKTNSTIMGASQYMSSNGLRAPSAASSVDNSKOILEOYAEDKRRLFLHOOEQEQEQEQEQODGNFS  
 501 MEQMAHNNYNNYNNYDYHRNKNGSHSDLVNLORSNVPYMOEDGALYPHOYSSPSYSLHPTGNQFNSATNNLPQFGNAMSISMOLPNGNSNKTAASSMNTNP  
 601 NTNMIIMNSNMNMNMNVNVPVYGMGNGANMYDVSRRMTPPLNIAPNSNNSKSSIMNKHPRNNVPPIHPSLLH

# JSN1

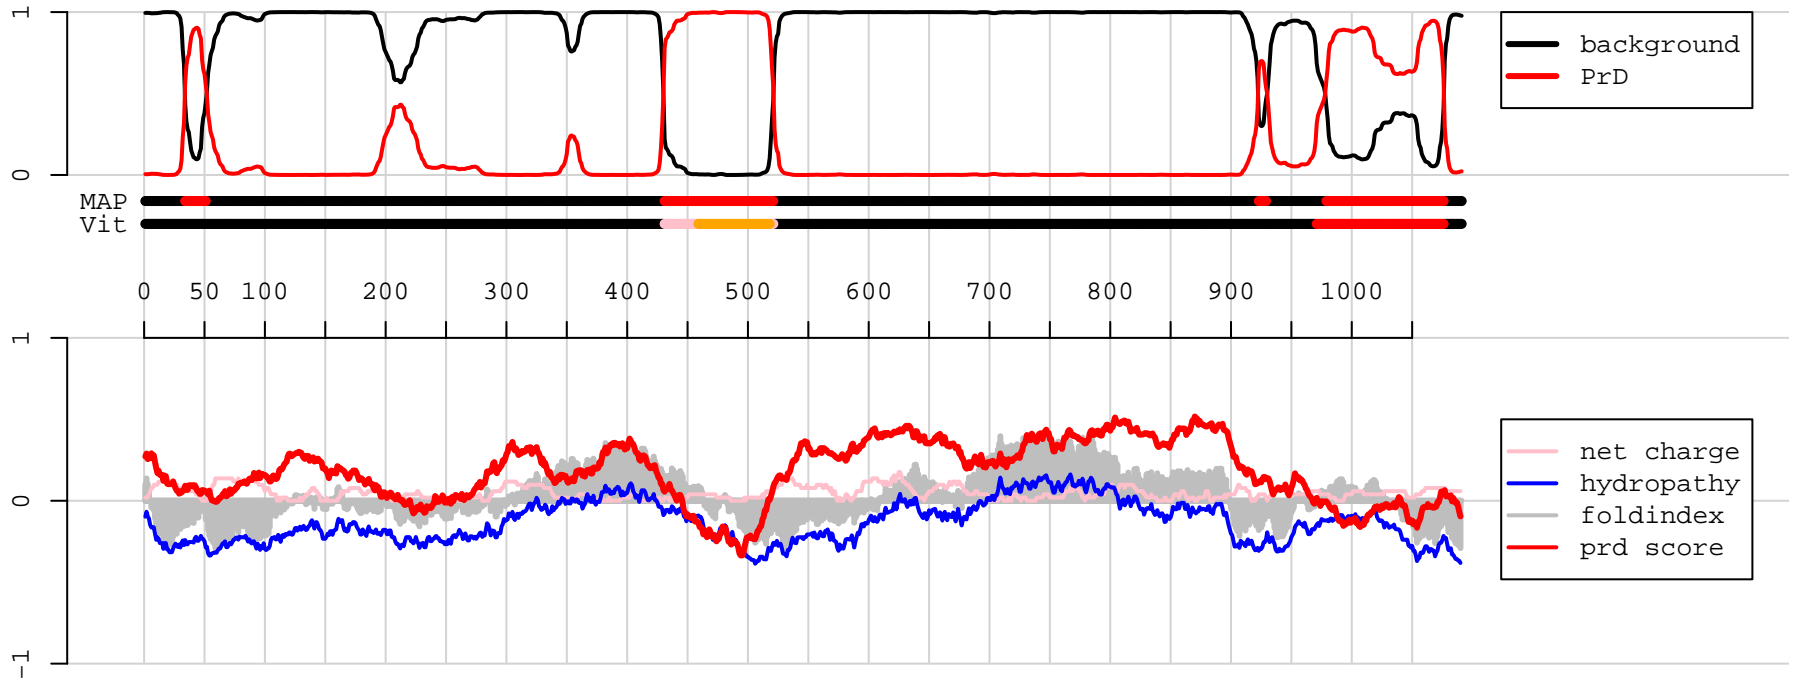

```

1   MDKSKQMNINNLSNIPEVIDPGITIPIYEEEEYENNGESNSQLOOQOPKLGSYRSRAGKFSNTLSNLLPSISAKLHHSKKNSHGKNGAEFSSSNSSQSTV
101 ASKTPRASPSRSKMMESSIDGVTMDRPGSLTPPDMEKLVHFPDSSNNFLIPAPRGSSDSFNLPHQISRTRNNTMSSQITSISSIAPKPRTSSGIWSSNA
201 SANDPMOQHLLQOLOPTTSNNTTNSNTLNDYSTKTAYFDNMVSTSGSOMADNKMNTNLAIPNSVWSNTRORSQSNASSIYTDAPLYEQPARASISSHYT
301 IPTQESPLIADEIDPQSINWVTMDPTVPSINQISNLLPTNTISISNVFPLQHQQQLNNAINLTSTSLATLCSKYGEVISARTLRNLNNMALVEFSSVESA
401 VKALDSLQKEVSMIGAPSKISFAKILPMHQPPQFLLSQGLPLGLENNNLOPOPLLQEOLFNGAVTFOOQGNVSIPVFNOOSOOSOHONHSSGSAGFS
501 NVLHGYNNNNSMHGNNNSANEKEQCPFPLPPPNVNEKEDLLREIIELFEANSDEYQINSLIKKSLNHKGTSDTQNFGPLPEPLSGREFDPPKLRELRKS
601 IDSNAFSDLEIEQLAIAMLDELPELSSDYLGNTIVQKLFEHSSDIIKDIMLRKTSKYLTSMGVHKNGTWACQKMITMAHTPRQIMQVTQGVKDYCTPLIN
701 DQFGNYVIQCVLKFGFPWNQFIFESIIANFWWIVQNRYGARAVRACLEAHDIVTPEQSIVLSAMIVTYAEYLSTNSNGALLVTWFLDTSVLPNRHSILAP
801 RLTKRIVELCGHRLASLTILKVLNYRGDDNARKIILDSLFGNVNAHDSSPPKELTKLLCETNYGPTFVHKVLAMPLLEDDLRAHIIKQVRKVLTDSTQIQ
901 PSRRLLEEVGLASPSSTHNKTKOOQOOQHHNSSISHMFATPDTSGQHMRGLSVSSVKSGGSKHTTMTNTTTTNGSSASTLSPGQPLNANSNSSMGYFSYPGV
1001 FVSGFSGNASNGYAMNDDLSSQFDMLNFNNGTRLSLPQLSLTNHNNTTMELVNNVGVSSQPHTNNNNNNNNNTNYNDDNTVFETLTLHSAN
  
```



# RBS1

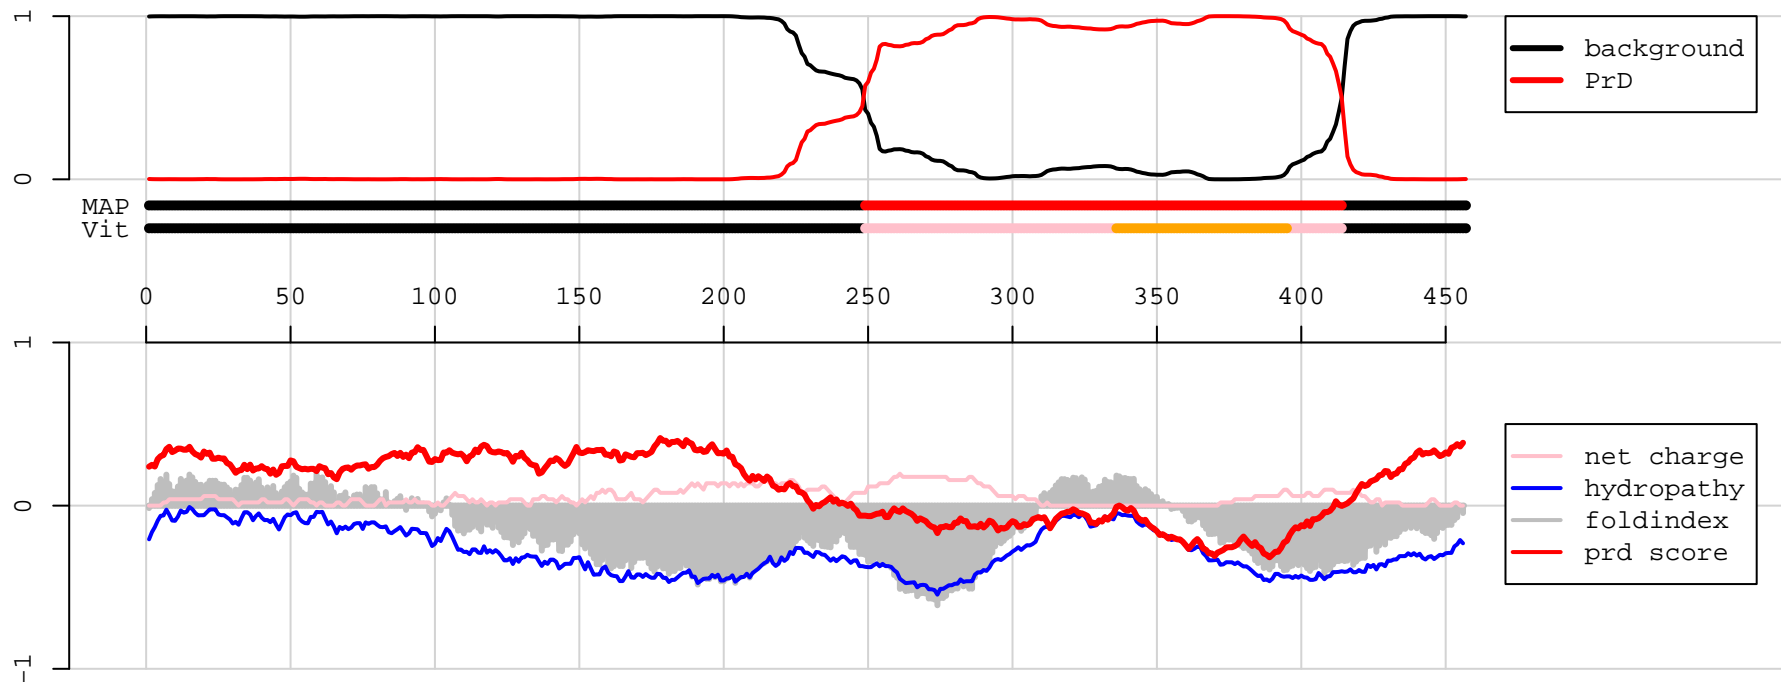

1 MTALDSRNWGLTPAMETGLFQKPQDRIFII E LENSIVSFINSNTESFQLRPMNSYYRLLSHQIAEYHNLNHLV LARTQDSCVILFKGENFQKIEGKPLLQE  
 101 LQLNKKPEECASSSEIEKSNNNRIFRILKRKEVGNEDYKIDGNTRTPNSNLTANSNKDQKIEIDDKSSTDLEQERIEKERLYEQRKQEIFDKLNKSED  
 201 DVKSTNSSGSSDSDNEWSDWLN GDDSN TQT SNGSVSSSSPFNSSVTTI OVNKPOOFYDSRRGRGGRRRGTNNYKDAYRGOSRRNKENGGYOSGYSSPYL  
 301 VYPPPOMGGNSLPTYPLMYNPAGPAPGPAPSPMVMGNNTVFMNPMYMNMPQGS CSF GTPIPMYPPYOYOYOYNT OYHSGPYSNTPSYNSNNYTRSSA  
 401 NKYHHFOGKNSYSGAIPKRSDDSN SNKNEGIRRASVEGSPSSRDTDSVEMKFDKLN I

## PDC2

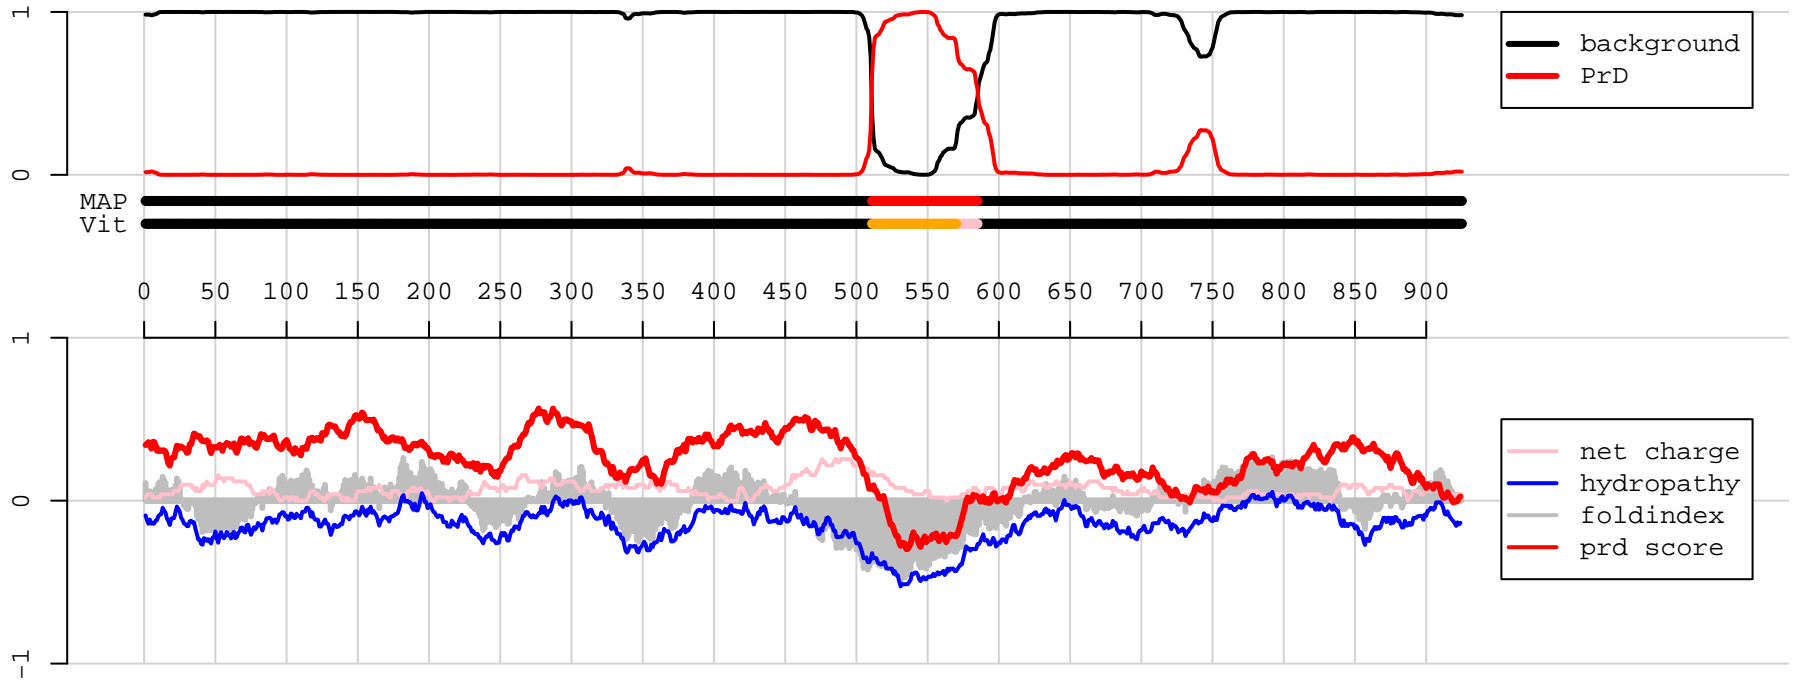

```

1  MLSIQQRYNICLMAERHPKWTQLELAKWAYETFQLPKIPSQGTISRLLARKSTYMNCKEHEKDANRLRKPNNLLVRKILQEWISQSLWNGIPITSPIIQD
101 TAQAVWHRIPAEHREGNGSFSYKVISNFLSKMDVNISVLDEELPKTPKVWTFEERDVLKAYFSKIPPKDLFTLDEAFLSYNLPLDYAQYEASSIQRRIEV
201 ATVMLCSNLDGSEKLPVVVGKYDSYKSFERNYFPNEPNPVSQSMLGTMMAKKFDISYHSNRKAWLTSNLFHNWLVRWDKRLVAVNRKIWIWVLDSCCHR
301 IINLRLQNIKLVYTSSNSKFLPFNWGVWDEFKTRYRIQOYQALIDLQNRISKNIQNKNSERNECIPNGKKCLISFEQSOLTMSNAFKFIKAWDDIPVD
401 AIKANWKSSGLLPEMIHLNENVSMFAKKNEVLESVLNRLCDEYYCVKKWEYEMLLDLNIEKNNTNFLSTEELVESAIVEPCEPDFDTAPKGNEVHDDNF
501 DVSVFANEDDNNQNHLSMSQAASHNPDYNSNHSNNAIENTNNRGSNNNNNNNNGSSNNIINDNDSVVKYLOONTVDNSTKTGNPGOPNISSMESQRNSSTTDL
601 VVDGNYDVNFNGLLNDPYNTMKQPGPLDYNVSTLIDKPNLFLSPDLDLSTVGVDMQLPSSEYFSEVFSSAIRNNEKAASDQNKSTDELPSSTAMANSNSI
701 TTALLESRNQAQPFDPVPHMGLLSDTSKSGHVSNSSNAISQNSLNNFQHNSASVAEASSPSITPSPVAINSTGAPARSIISAPIDSNSSASSPSALEHLE
801 GAVSGMSPSSTTILSNLQTNINIAKSLSTIMKHAESNEISLTKETINELNFNYLTLLKRIKKTRKQLNSES IKINSKNAQDHLETLLSGAAAAAATSANN
901 LDLPTGGSNLPDSNNLHLPGNTGFF
  
```

# SIN3

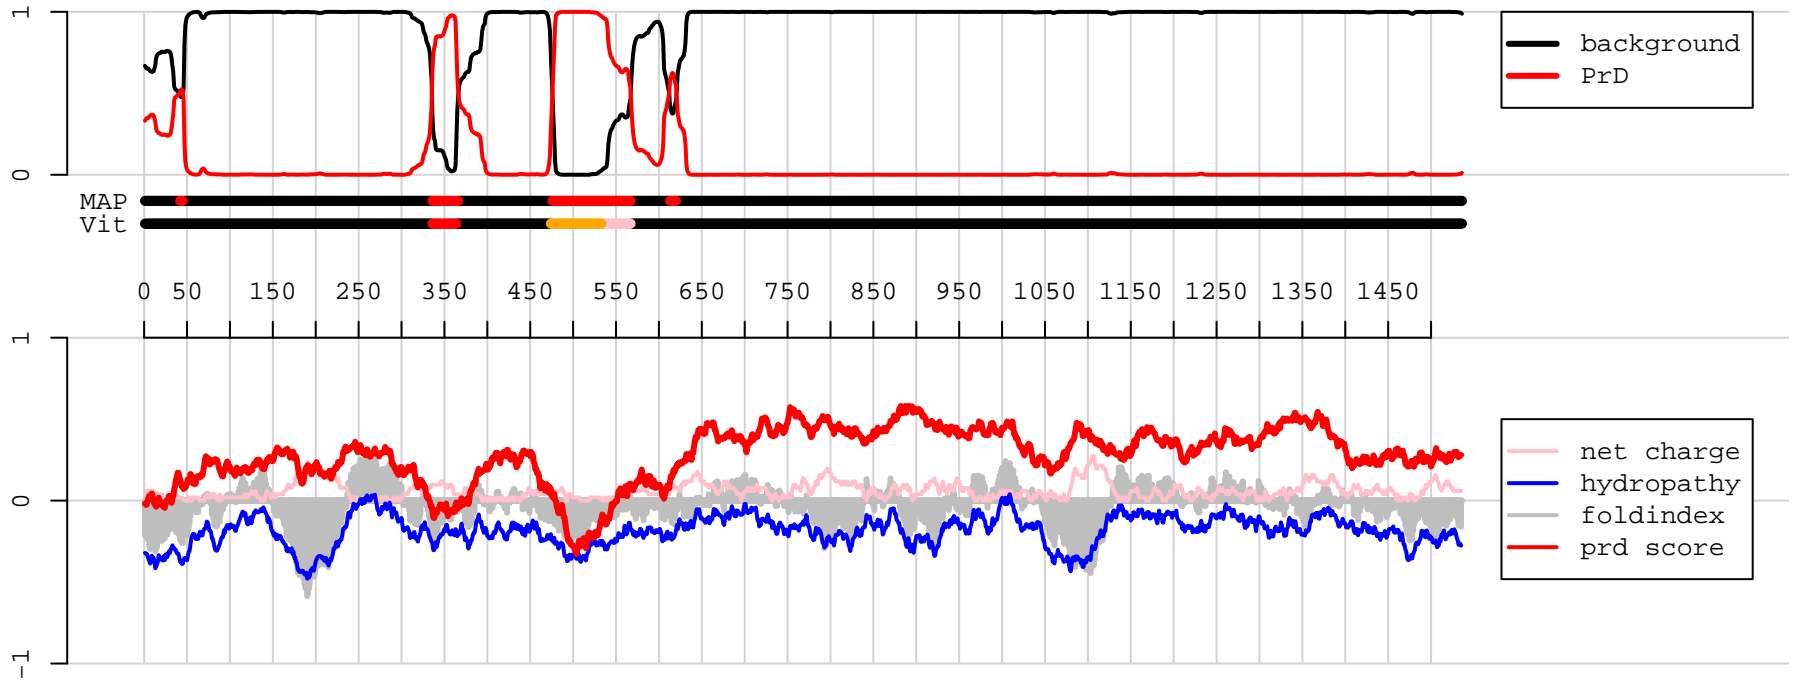

```

1  MSOVWHNSNSQSNDVATSNDATGSNERNEKEPSLOGNKPGFVQOQRITLPSLSALSTKEEDRRDSNGQQALTSHAHHILGYPPPHSNAMPSIATDSALK
101 QPHEYHPRPKSSSSSSPSINASLMNAGPAPLPTVGAASFSLSRFDNLP IKAPVHTEEPKSYNGLQEEKATORPODCKEVPAGVOPADAPDPSSNHADAN
201 DDNNNNENSHDEDEDADYRPLNVKDALSYLEQVKFQFSSRPDIYNLFLDIMKDFKSQAIDTPGVIERVSTLFRGYPILIQGFNTFLPQGYRIECSNPDDPI
301 RVTTPMGTTTTVNNNISPSGRGTTDAQELGSFPESDNGNGVQOPSNVPMVPSVYQSEONODQOOSLPLLATSSGLPSIQPEMPAHRQIPQSQSLVPOEDA
401 KKNVDVEFSQAI SYVNIKTRFADQPD IYKHFLEILQTYQREQK PINEVYAQVTHLFONAPDLLED FKKFLPDSSASANOVOHAOOHAOOOHEAOMHAO
501 AQAQAQAQAQVEOQKOOOFLYPASGYYGHP SNRGIPOONLPPIGSFSPTNGSTVHEAYODOQHMP PHFMPLPSIVQHGPNMVHOGIANENPPLSDLR
601 TSLTEQYAPSSIOHQOOHPOSISPIANTOYGDIPVRPEIDLDP SIVPVVPEPTPEPIENNISLNEEVTF FEKAKRYIGNKHLYTEFLKILNLYSQDILDLD
701 DLVEKVD FYLGSNKELFTWFKNFVGYQEKT KCIENIVHEKHRLDLDLCEAFGPSYKRLPKSDTFMPCSGRDDMCWEVLNDEWVGHPVWASEDSGFIHRK
801 NOYEETLFKIEEERHEYDFYIESNLR TIQCLETIVNKIENMTENEKANFKLPPGLGHTSMTIYKKVIRKVYDKERGF EIIDALHEHPAVTAPVVLKRLKQ
901 KDEEWRAQREWNKVVWRELEQKVFFKSLDHLGLTFKQADKLLTTKQLISEISSIKVDQTNKKIHWLTPKPKSQLDFDFPDKNIFYDILCLADTFITHTT
1001 AYSNPKERLKDLLKYFISLFFSISFEKIEESLYSHKQNVSESSGSDGSSIASRKRPYQOEMSLLDILHRSRYQKLR SNDEDGKVPQLSEPEEPNT
1101 IEEEELIDEEAKNPWLTGNLVEEANSQGI IQNRSIFNLFANTNIYIFFRHWTTIYERLLEIKQMNERVTKEINTRSTVTF AKDLDLLSSQLSEMGLDFVG
1201 EDAYKQVLR LRSRLINGDLEHQWFEE SLRQAYNNKAFKLYTIDKVTQSLVKHAHTLMTDAKTAEIMALFVKDRNASTTS AKDQIIYRLQVRSHMSNTENM
1301 FRIEFDKRTLHVSIOYIALDDLTLKEPKAEDKWKYVYVTSYALPHPTGEGIPHEKLIKIPFLERLIEFGQDIDGTEVDEEF SPEGISVSTLKI KIQIPITYQL

```

# NSP1

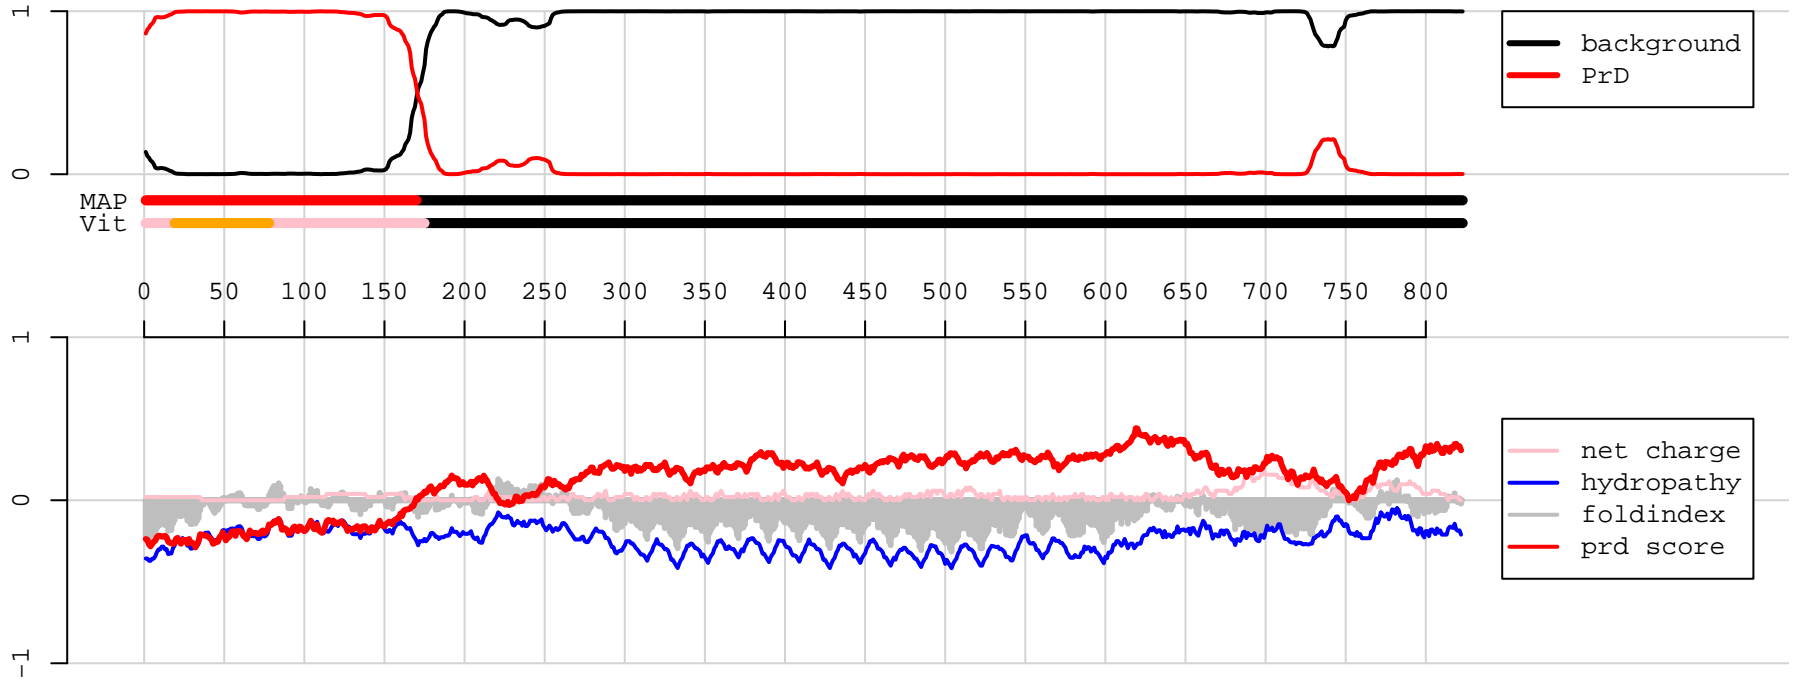

1 MNFNTPOONKTPFSFGTANNNSNTTNONSSTGAGAFGTGOSTFGFNNSAPNNTNNANSSITPAFGSNNTGNTAFGNSNPTSNVFGSNNSTTNTFGSNSAG  
 101 TSLFGSSSAOOTKSNGTAGGNTFGSSSLFNNSTNSNTTKPAFGGLNFGGGNNTTPSSSTGNANTSNLFGATANANKPAFSFGATTNDDKKTEPDKPAFSF  
 201 NSSVGNKTDAQPTTGFSFGSQLGGNKTVNEAAKPSLSFGSGSAGANPAGASQPEPTTNEPAKPALSFGTATSDNKTTNTTPSFSFGAKSDENKAGATSK  
 301 PAFSFGAKPEEKDDNSSKPAFSFGAKSNEDKQDGTAKPAFSFGAKPAEKNNNETSKPAFSFGAKSDEKKDGDASKPAFSFGAKPDENKASATSKPAFSF  
 401 GAKPEEKDDNSSKPAFSFGAKSNEDKQDGTAKPAFSFGAKPAEKNNNETSKPAFSFGAKSDEKKDGDASKPAFSFGAKSDEKKDSDSSKPAFSFGTKSN  
 501 EKKDSGSSKPAFSFGAKPDEKKNDEVSKPAFSFGAKANEKKESEDESKSAFSFGSKPTGKEEGDGAKAAISFGAKPEEQSSDTSKPAFTFGAOKDNEKKT  
 601 EESSTGKSTADVKSSDSLKLNKPVSLDNKTLDDLVTKWTNQLTESASHFEQYTKKINSWDQVLVKGGEQISQLYSDAVMAEHSQNKIDQSLQYI  
 701 ERQDELENFLDNFETKTEALLSDVVSTSSGAAANNNDQKRQQAYKTAQTLDENLNSLSSNLSSLIVEINNVSNTFNKTTNIDINNEDENIQLIKILNSH  
 801 FDALRSLDDNSTSLEKQINSIKK

# VTS1

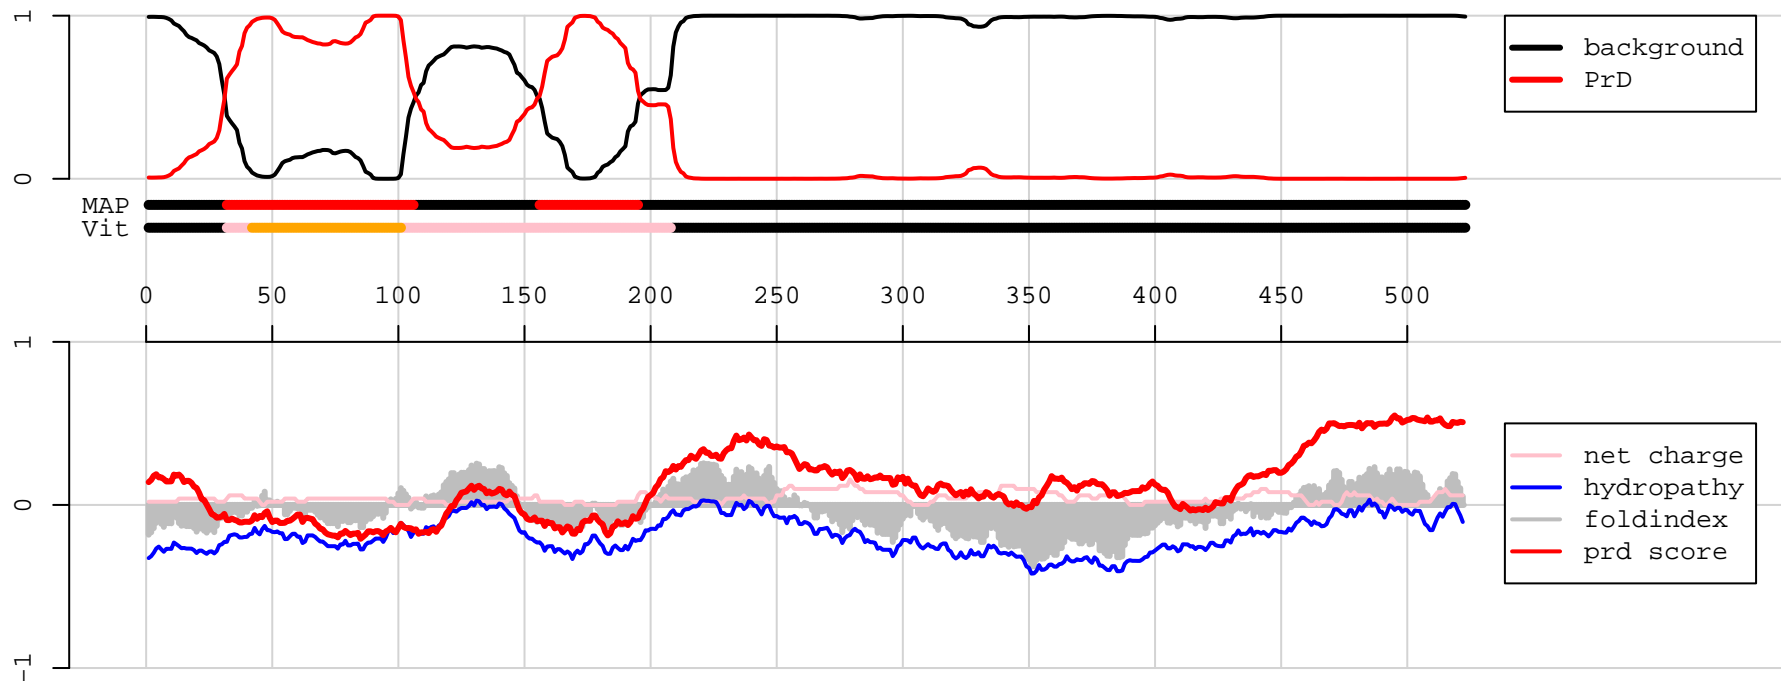

1 MKHPYEEFPTGSKSPYNMSRGAHPGAVLLSPOSSAINKNNPGSNSGNNOGNSSVTANVLSPOSHSMSLNDMLDOOSFMLDTAGTRAOPLOOOOOOOOOO  
 101 QASLPSLNIOTVSSSTAAGSAIVSPMMQSPKALQSTLSSTSMYLDSFQRSPNNILGIPSOSGSIPLPOSROSOOSOSOKNDPNMGTNFSODINOLCSWIS  
 201 MLNSSQQNTVMDNILSILNDDVLKYTKLKIETLTNTPFISPLPAIASPIPNRDDTQILNIDSVFSSSPITNDPENTDNLLYQNWSPQPHSIPISQPIYD  
 301 NITDASQRSKSAEPHVNSSPNLIPVOKQFNNGNSTKYKKLPSENPNYLSHSLSSSHSFFQPKKRSNMGNEYNSHHHSLHHPLHNTTSYFSNTSRPSGTD  
 401 LNKSNOVFNNTITHPNAGPTSATSTSTSSNGNTPLSSNSSMNPKSLTDPKLLKNIPMWLKSLRLHKYSDALSSGTPWIELIYLDDETLEKKGVLALGARR  
 501 KLLKAFGIVIDYKERDLIDRSAY

# RIM4

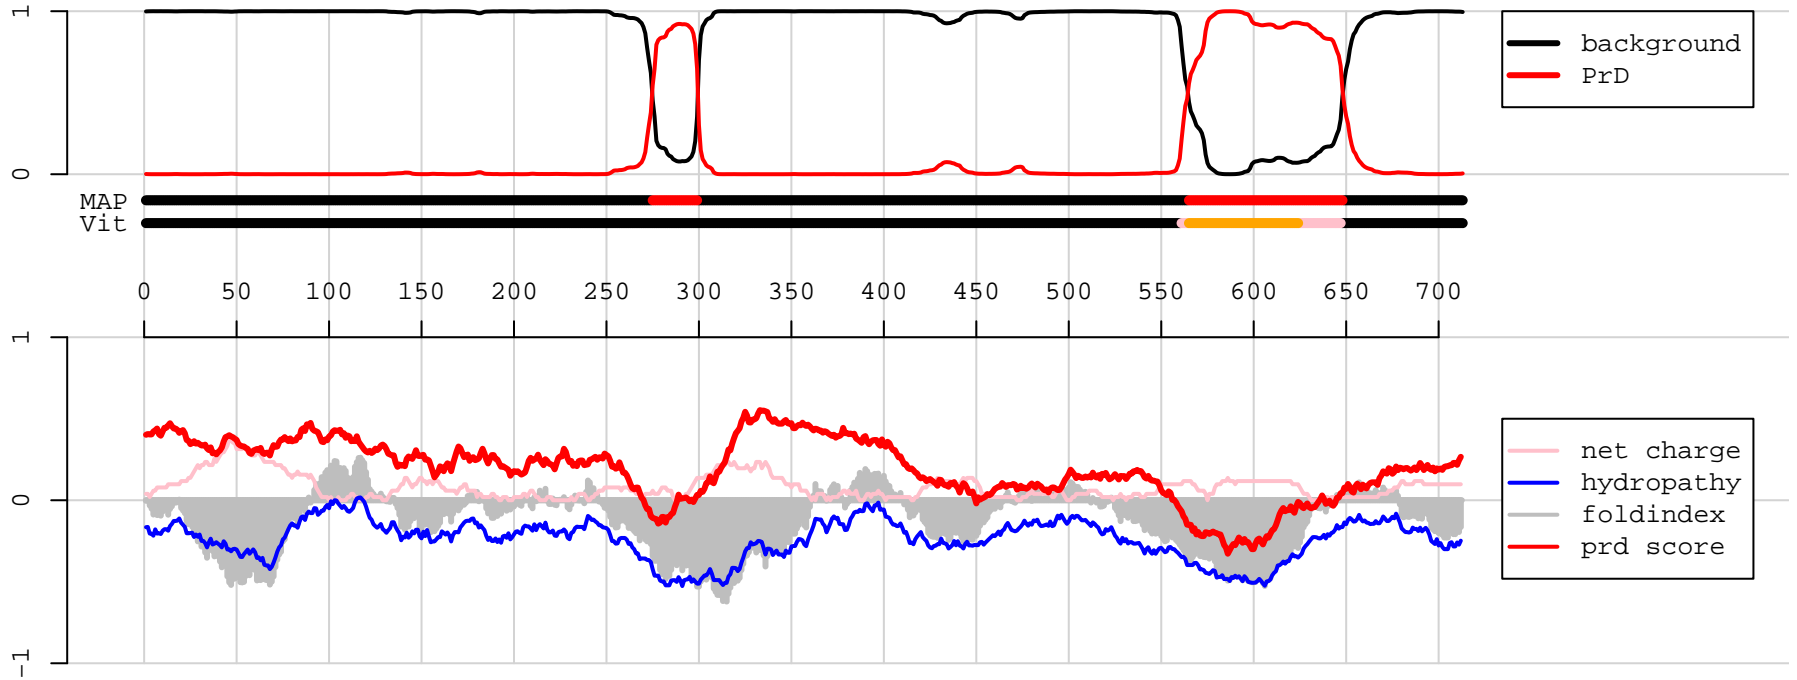

1 MKTEI<sup>+</sup>STADSLRDPPSNGLKADSELVIRE<sup>+</sup>DIDQFLPSEVSSLGSDHQNDGEDSDTDSDNFLQDPEDDVDEESTGRGTVTTTSTSTESRGRPPSSCIFVASL  
 101 AAALS<sup>+</sup>DDELCLSVTENFKKYGDLARVKVLRDNANRPYAFVOYNNDDAKHALIRAOGTLLNGRRLRCEPAKVNRTLYLKNQOSIDFNEISQICEKFGGLE  
 201 QIVPDR<sup>+</sup>TDNQYTRRYTYP<sup>+</sup>ISSANSWFVQFVYRDDAIRAYANLRTDPNWIIEWAQNINVPKNYNLLHKS<sup>+</sup>KFKSSKYHONNGI<sup>+</sup>INNDGSNNNDNNNSNNNNR  
 301 EDSRRNGDVIEEECGHVHGS<sup>+</sup>DSEEKLTSDGIYDDEDK<sup>+</sup>DSEITIDKRSIFVGQLDKETTREELNRRFSTHGKIQDINLIFKPTNIFAFIKYETEEAAAAAL  
 401 ESENHAI<sup>+</sup>FLNKTMHVOYKEVGGRRHNRKFSGKN<sup>+</sup>GGSNFNHHQFFSTRSGKTFTGPELNLAPPPINMYRKMSSGGSQQESETMMPYMPGMPMPGPPPPNAAS  
 501 LSDFDMFPPSYSTFMKGMMPLRRKSM<sup>+</sup>PNSWSSPSSKSVNSENESVNGGDENSELPSEIPESSGRYNAANSFTTYNNSSAGNSNNNNNNNNNSNSNKS<sup>+</sup>SOYKK  
 601 RYARRSSYGYNEVPPKPY<sup>+</sup>YFQPY<sup>+</sup>YHPMOYHMGPMGPLHPSOGSAGNHHPYMMVYPMSPPPPSGLDGSMIPPPINVSQSHAANHGSTHVHANEFISNDTG  
 701 DINEDNKAYS<sup>+</sup>LDY

# PSP1

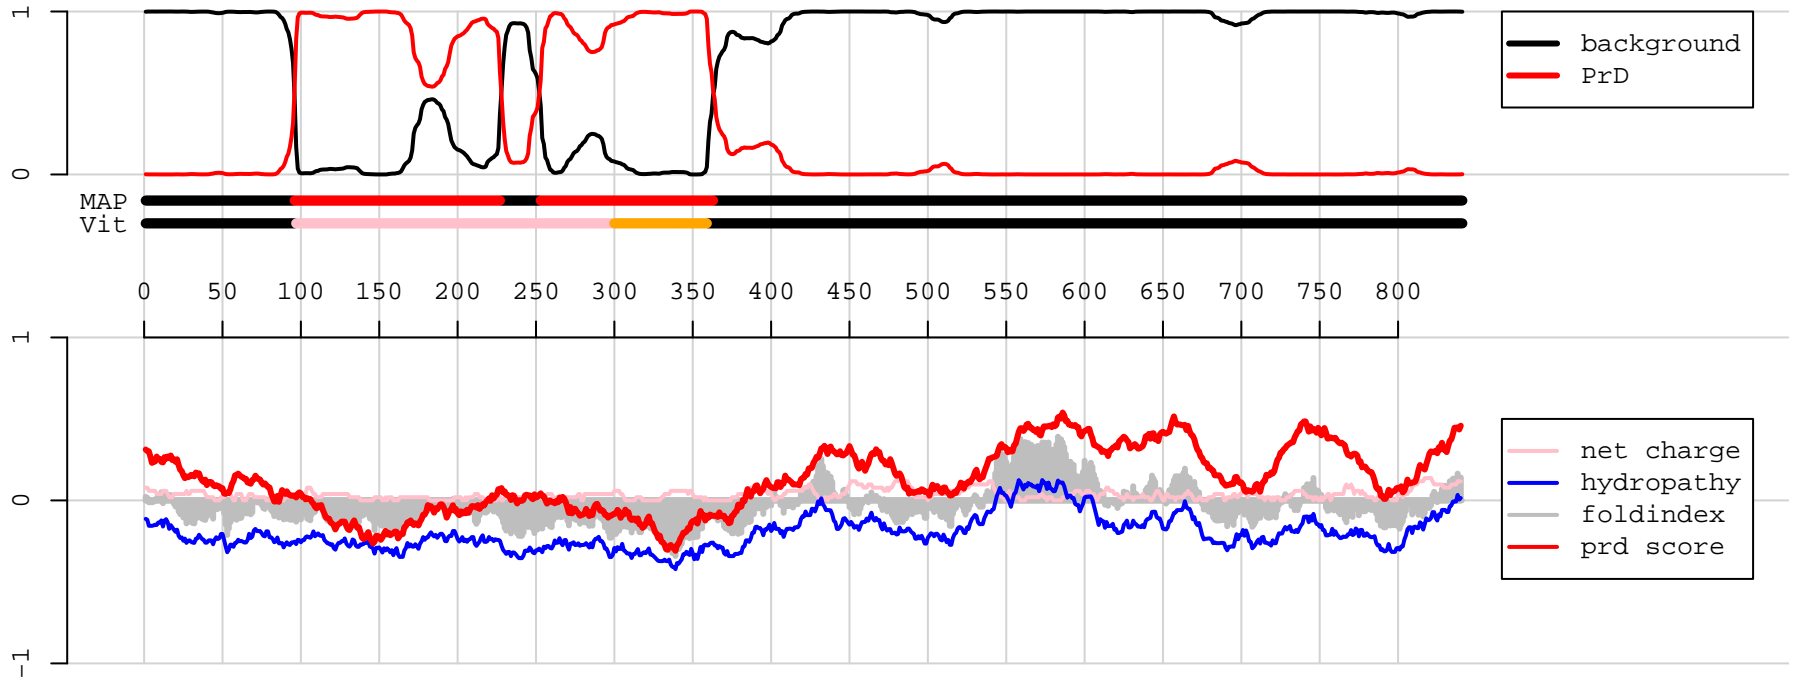

1 MDLPTVNSTTTSISDNVDLKNYYEDLLFKNNSGKSLSDLPRKLNDSNNSGSDTVDPLAGLNNLRNSIKSAGNGMENRRTFDDIDFMGRFPYLPVPVNOOO  
 101 QPFSHQNGFIOEHPSSNLTSFOMSSSNSEPMASAPPISSNNNNLNSTOMGNYOAOORSFPOFNGNSFHSNGNDLMGNRMDSDYMRLMKNKTNIQFTSNSGSN  
 201 FAAPSHSAGNPSSMNNNOVPSFNWQOPSHPESTIRRSSYISDTLINHOMPDAQKOTSOVVOOHAOGFNLFNSRFNYDNLNSTHLTAKGVPEFGNGVOPP  
 301 YPYDNEPNNASISNSNNNNNSHNMVPMOOFRRNTOPVASFNPSLPTFOOOOQPOPOOPRNVNVPTSFNGERVDDVOLVOLORSSSVPSSTNSHNLQNE  
 401 NSNEGNVSLDNGLVLIQGHKLTSSKTLHDLYSDCGSGYFASSAVFEFTDNIKKMLKLHDSNESYDAKNMGLIDEEGNTYQSLNFLDILRSCNMNYVNDP  
 501 ESNNGIVSNNGGNKNRRKGSFTTELSCRNANNNSFLPYTPLVLVALKNGKLELLSTPQATNLLLKRGDLVIDGDRGRDLVLVVEPSVDLNLALFINFLKK  
 601 KIHFDSLITSESOHYRNDDEFIQMLIDSKNGQKKKLNPKLYDVVELTELIIPSKQVLRFATPWVETTLNHNKFEDELKALHIAQSKLOALNDNSKSKQNTND  
 701 SSSNNFTNAATYSKPKLNILNAEFQFDRKELTFYVYVCEERNDFRDLIKELFKYYKTRIWLCIIPNNLSIDSKYYDKQOKELKLYQNIIVKYNNAEDLMN  
 801 VNEFSQNRGNRRVNFAPPLNEIELDNFQIAYVEELVHELPH

# YAP1802

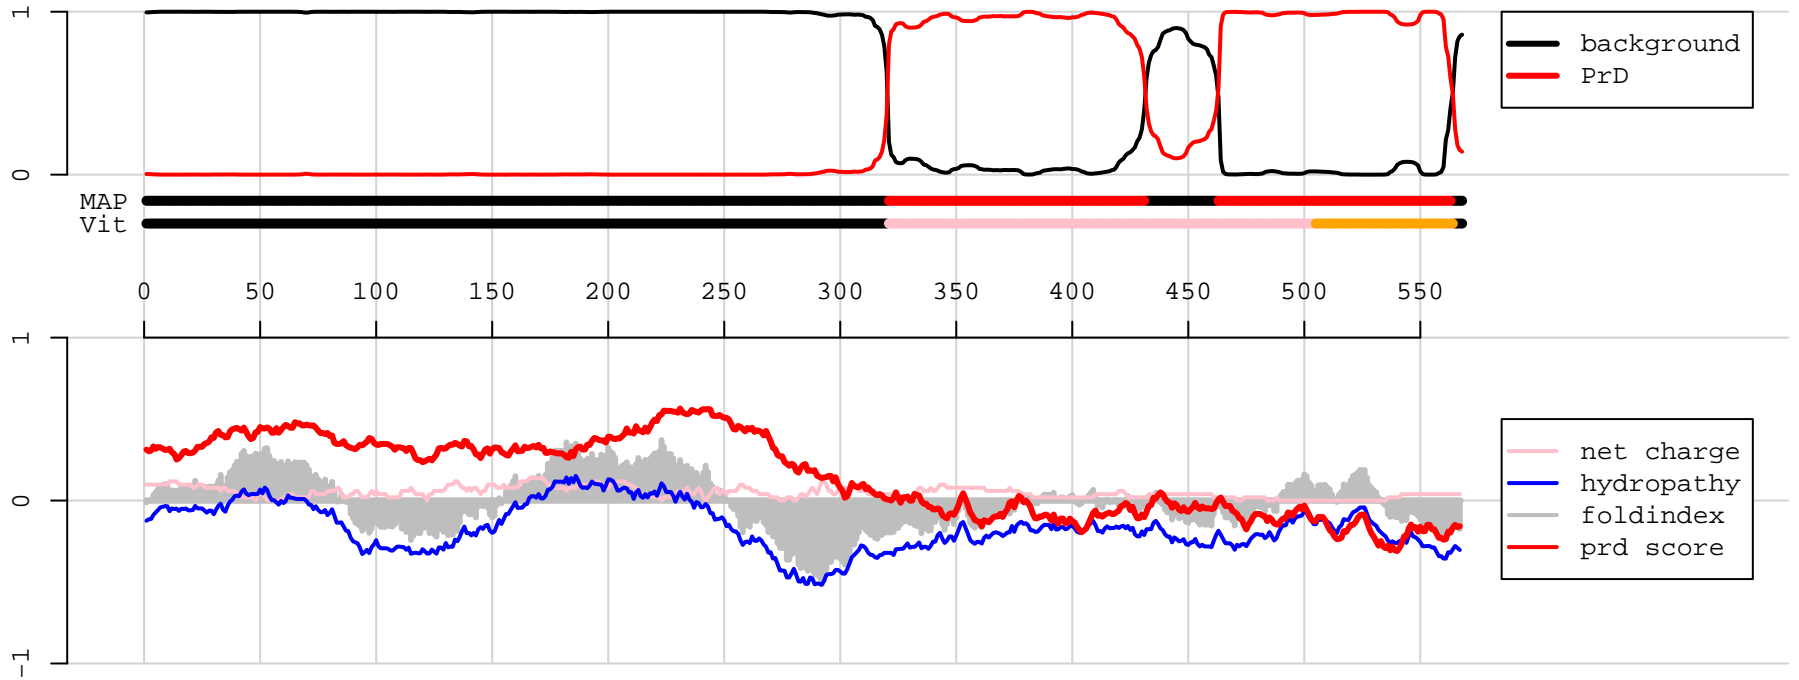

1 MSSLYTKLVKGATKIKMAPPKQKYVDPILSGTSSARGLQEITHALDIRLSDTAWTIVYKALIVLHLMIQGGEKDVTLRHYSNLDVDFQLRKISHTTKWSS  
 101 NDMRALQRYDEYLRCEEYGRGMDHLRDNYSLLKLGSKNQLSMDEELDHVESLEIQINALIRNKYSVSDLENHLLLYAFQLLVQDLLGLYNALNEGVI  
 201 TLLESFFELSIHAKRTL DLYKDFVDMTEYVVRYLKIGKAVGLKIPVIKHITTKLINSLEEHLREETKRQGEPEPQODRKPSTAISSSSHNNNSNDK  
 301 NK SIAQKLEQIREQKRLL E OOLONQQLLSPTVPODAYNPFSGSOODLNNDTFSFEPTOPOMTAOVPOPTANPFLIPQOQOALOLTSASTMPOPSEIQ  
 401 ITPNLNNOOTGMYASNLOYTPNFTGSGFGGYTTENNAIMTGTLDPTKTGSNNPFSLENIAREOQOONFONSPNPFTLOOAOTTPILAHSOTGNPFOAON  
 501 VVTS PMGT YMTNPVAGOLOYASTGAOQOPOMMOGootGYVMVPTAFVPI N O O O O O O O H O O E N P N L I D I



# YMR124W

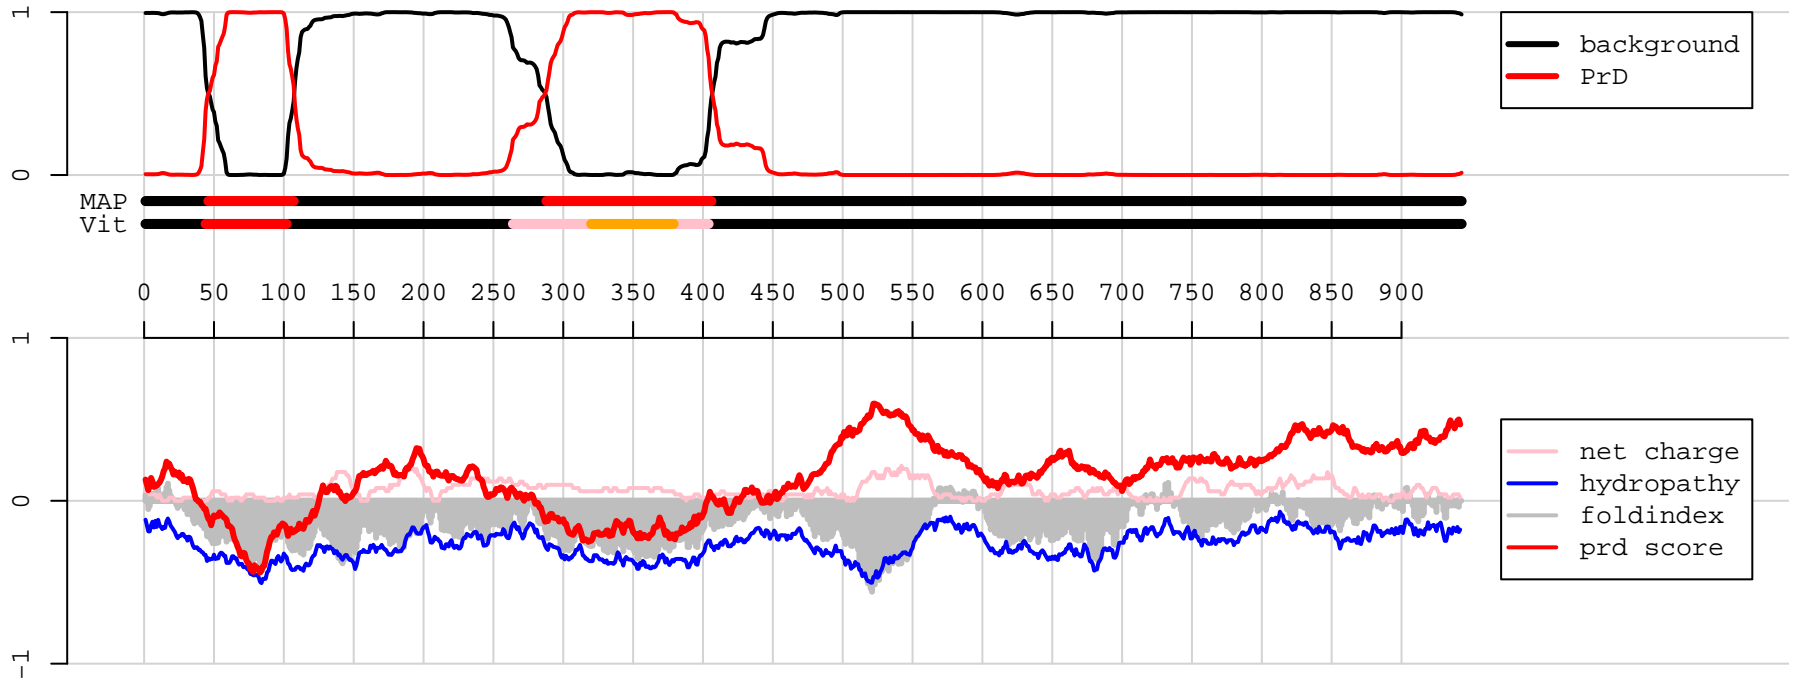

1 MDAGLSTMATRNGQSSARVKLRNNLLNNDIGNIDIRDETPISRNGNDSNINIOPSSVPOOOOOOOOYYRNGMNEAPIQAPLQORQIPMONYSOOOROOO  
 101 YNFEYSNPHMNEIPLMOHNFTKPSLSNNRDNVNGKASSFTQSSFSNFFKHKHQFGKSKKNTKGTGGGGDGGDDDEVILDDSANSDLTFNDIQTFGHKGG  
 201 DKYGYGGDSTPIIPTLVTKDRGNMSNTEYRKYITNQRKTAMNAMAKQTKNGTLASLPPRAMSLQSFPNGNPLMQAPT<sup>PHPRFOPNKMV</sup>SANYSRNSLSMS  
 301 GPPGOFROPOOORMLPMNNYNNHPGOFONTPPVMP<sup>SGOOPPOOPRTL</sup>SLTNGPRYSPONPRPFAGHOOISOROOOOOOOL<sup>OLHPMSEGYRTMSLOSONVP</sup>  
 401 QGFNPWSPNDNDRKAVSMKOPISOSSISSKNNSAYSIPNVQNNSLTTFSPSSPTDATAMPNSTKQGSSPLKKQVNI<sup>DQPIENK</sup>GKLNVLQ<sup>LSTPQONELK</sup>  
 501 EKERKLAEMEKSLRERREALVEEKEKERAEKNT<sup>EANEEEEI</sup>SHESDDLNLRPASALETGLKDLKLESESAVANRASLSTFSSTFS<sup>SDSPSKQRI</sup>INTRTGM  
 601 KLENSTDINEYVTAQEFPSPGKYNSNSDNGEMNTTNEVDFDFNTSKRASLLQSI<sup>PERDPKRN</sup>VSDATIKRRES<sup>DGNRRLSNVNI</sup>SMNQENINNDTFLYK  
 701 KNNRDGHL<sup>SAVSHMSSSR</sup>RSFISNTLPLNIDSASESDNFVPHMDGSPSKTKSAPVSYDKDGMNASEEDFSFDNTLAKPYEPLYARRGDITSAGSTSGED  
 801 SSQPKMITISGEQLNLITENKELMNELTLVSTELAESIKRETELEERIRLYETNNSAPSFDSSSVS<sup>FSDFEKELRKKSSKIVQLIQQLN</sup>DERLKR<sup>FIAE</sup>  
 901 EQLLLQENGT<sup>KPSSMELVGR</sup>IE<sup>NLNKLI</sup>DERDSEIEMLK<sup>GRLQ</sup>

# NPL3

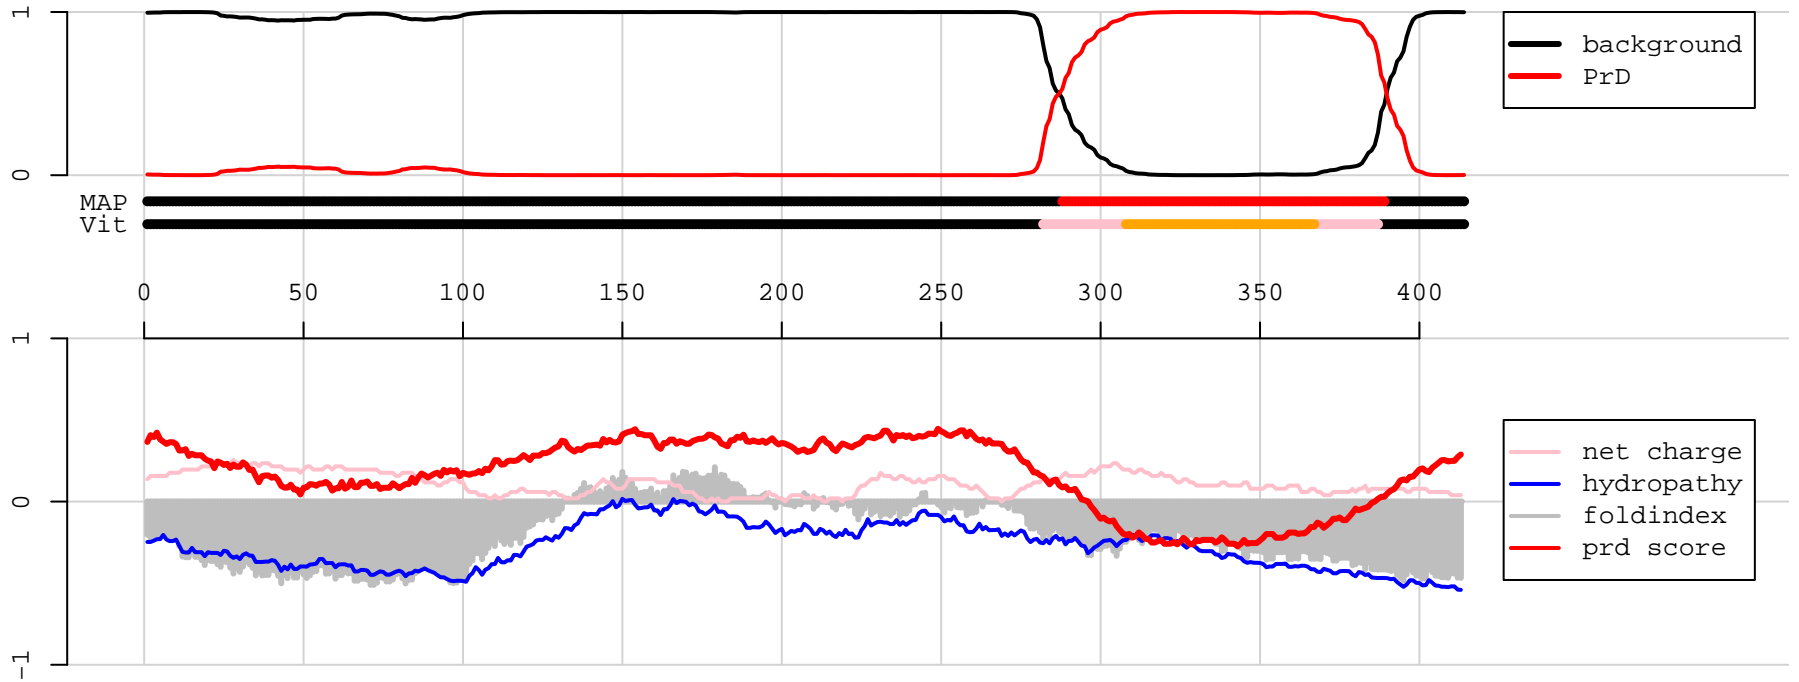

1 MSEAQETHVEQLPESVVDAPVVEEQHQEPPQAPDAPQEPQVPOESAPQESAPQEPAPQEQNDVPPPSNAPIYEGEESHVQDYQEAHQHHQPPEPQPYYP  
 101 PPPPGEHMHGRPPMHRQEGELSNTRLFVRPFPLDVQESLNEIFGPFQPMKEVKILNGFAFVEFEEAESAAKAIEEVHGKSFANQPLEVVYSKLPKRY  
 201 RITMKNLPEGCSWQDLKDLARENSLETTFSSVNTRDFDGTGALEFPSEEILVEALERLNNIEFRGSVITVERDDNPPPIRRSNRGGFRGRGGFRGGFRGG  
 301 FRGGFSRGGFGGPRGGFGGPRGGYGGYSRGGYGGYSRGGYGGSRGGYDSPRGGYDSPRGGYSRGGYGGPRNDYGPGRGSYGGSRGGYDGPGRDYGPGRDA  
 401 YRTRDAPRERSPTR

# GLN3

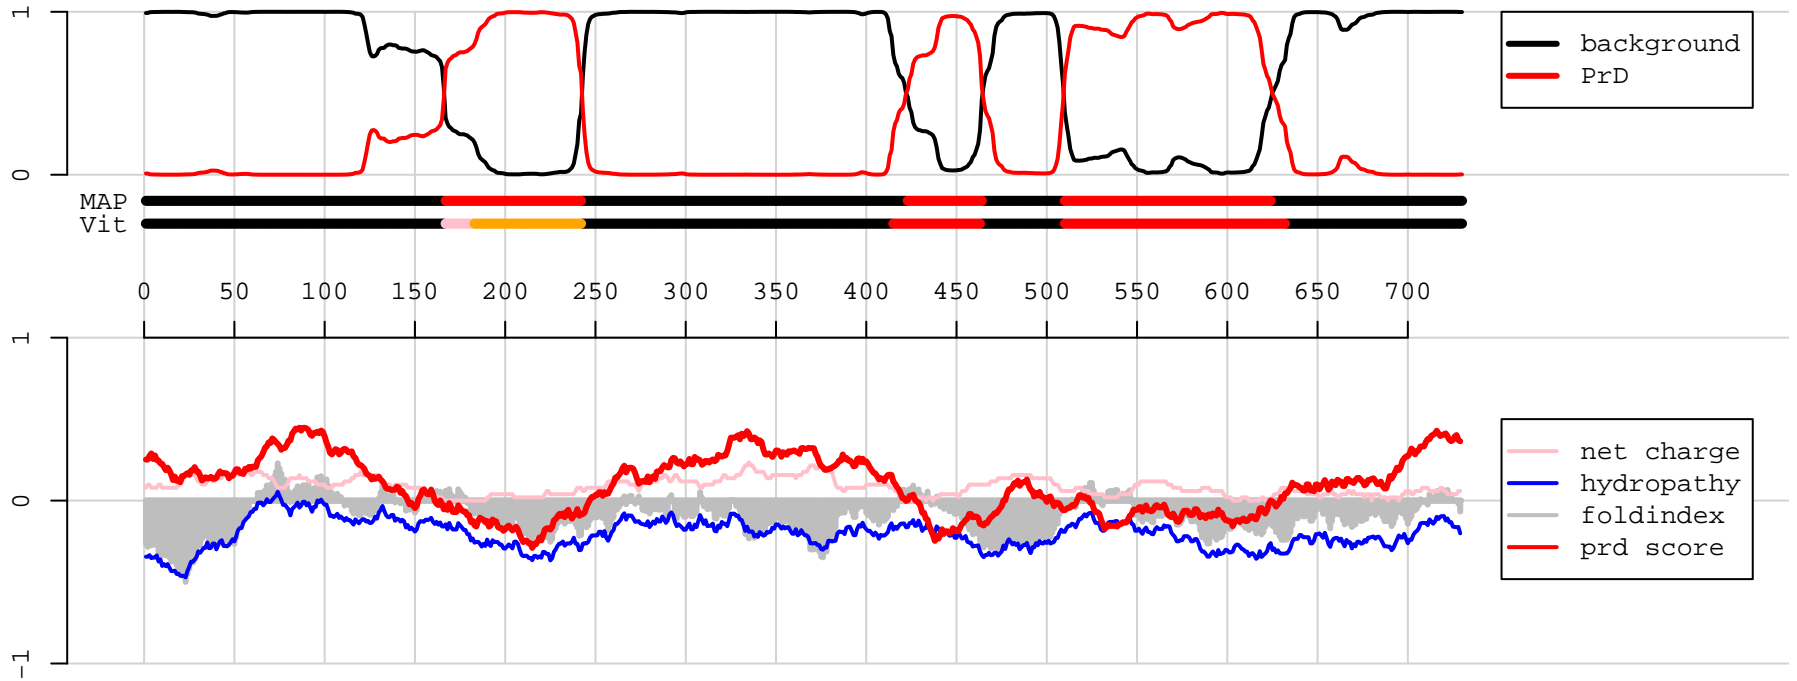

1 MQDDPENSPLYDLLNSHLDVHGRSNEEPRQTGDSRSQSSGNTGENEEDIAFASGLNGGTFDSMLEALPDDLYFTDFVSPFTAATTSVTTKTVKDTPAT  
 101 NHMDDDIAMFDSLATTQPIDIAASNQONGEIAQLWDFNVDQFNMTPSNSSGSATISAPNSFTSDIPPOYNHGSLGNSVSKSSLPYNSSTSNINQPSIN  
 201 NNSNTNAOSHHSFNIYKLONNNSSSAMNITNNNNNSNNSNIQHPFLKKSSDS IGLSSNTTNSVRKNSLIKPMSSSTLANFKRAASVSSSISNMEPSGQNK  
 301 KPLIQCFNCKTFKTPLWRRSPEGNTLCNACGLFQKLHGTMRPLSLKSDVIKKRISKKRAKQDPNIAQNTPSAPATASTSVTTTNAKPIRSRKKSLQONS  
 401 LSRVIPEEIIIRDNIGNTNNILNVNRGGYNFNSVSPVLMNSQSYNSSNANFNNGASNANLNSNNLMRHNSNTVTPNFRRSSRRSSTSSNTSSSSKSSRSV  
 501 VPILPKPSPNSANSOQFNMMNMLMNTTNNVSAGNSVASSPRIISSANFNNSPLOQNLLSNSFORQGMNIPRRKMSRNASYSSSFMAASLOOLHEQOVD  
 601 VNSNTNTNSNRQNWSSNSVSTNSRSSNFVSQKPNFDIFNTPVDSPSVSRPSSRKSHTSLLSQQLQNSESNFSISNHKFNMRLLSSDSTSPIKYEADVAG  
 701 GKISEDNSTKGSSKESSAIADELDWLKFGEI

# NUP42

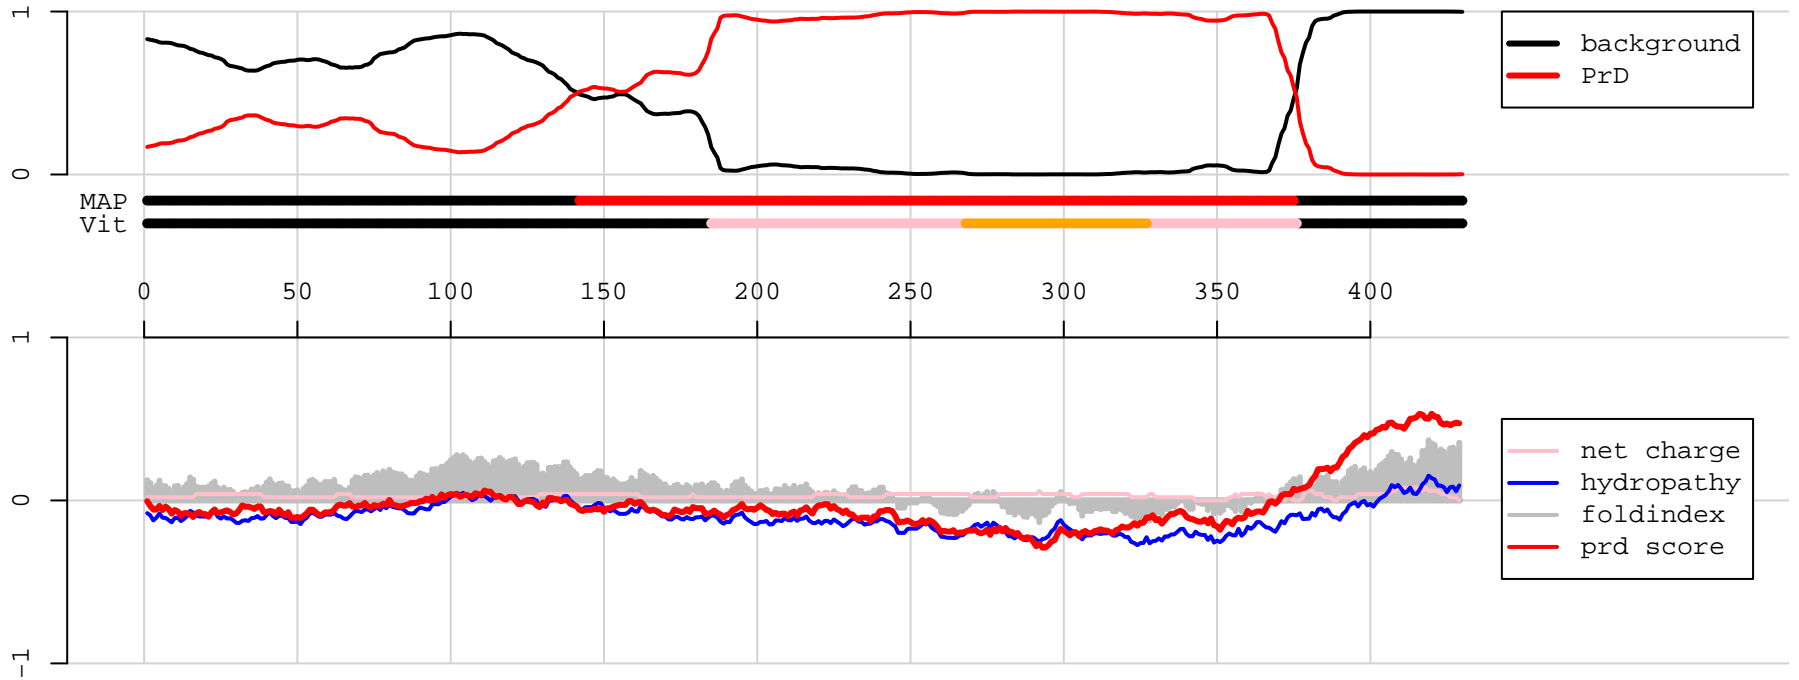

1 MSAFGNPFTSGAKPNLSNTSGINPFTNNAASTNNMGSAFGRPSFGTANTMTGGTTTSAFGMPQFGTNTGNTGNTSISAFGNTSNAAKPSAFGAPAFGSS  
 101 APINVNPPSTTSAFGAPSPFGSTGFGAMAATSNPFGKSPGSMGSAFGQPAFGANKTAIPSSSVSNNSAFGAASNTPLTTTSPFGSLONASONASSTSS  
 201 AFGKPTFGAANTTOSPFGTIONTSTSSGTGVSPFGTFGTNSNNKSPFSNLOSGAGAGSSPFGTTTSKANNNNNVGSSAFGTTNNQSPFSGSGGTFGSAS  
 301 NLNKNTNGNFOSSFGNKGFSFGITPONDANKVSOSNPSFGOTMPNTDPNLSLKSNGNATSFGFGOOMNATNVNANTATGKIRFVQGLSSEKDGILELAD  
 401 LAETLKIIFRANKFELGLVPDIPPPALVA

# PAM1

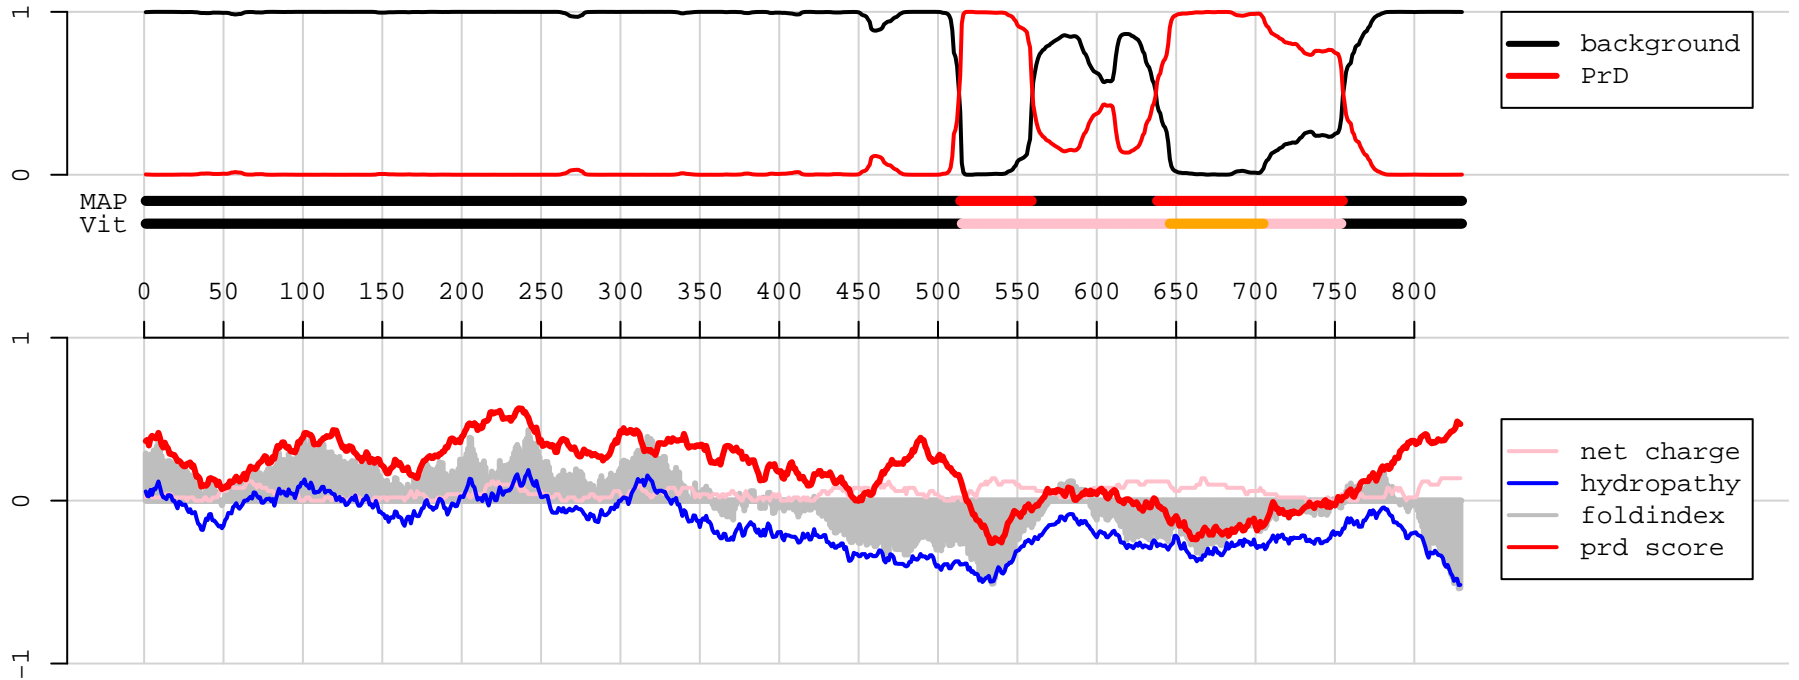

```

1  MTSALRVLVCGDHPNLILYTSRFQHAKNIEFYLVNNSKNANYEVSSLFYGTERFQIQNHFQSLLDLVDLNNENGLVFDLIIMSASSLQEIPQVLRDIKP
101 MMNKTTKILFESSGFIYLEPFIKASVDLSLSNIFSIFTDYDIRRLDNGSYKQFTTANAKSFSVSIQTTSVHENSYSDDIIPILNTFQKLFQKLFPRDVV
201 TLYDHSPSAFLAKEWELALPQICFDPLLIILEEKNPSTLDDHVLAKPLISGLLGESLLI IKKMGIAMNNPNFQNEQTILKHWKNKCEDLPDGPALLYNFI
301 HKASSLNIDL LLLLPILLADDFGVKTPYLECLFTMMTQYQLLNKGDSEWFIRK DENTALTRVDDLONSI ALKDGKIMQLQNSESTLKNEIKELQSOVLSL
401 KQEVSSSKANNGOELEILKKKVQMGDNSLFDRPNSNTNGISPSDNIVDVLN YERSDQGNSSGNDSSRRQSF FNSTSDTTLSRDETSLKERELEVRMKEL
501 ELQERELELQKAL QOQOQYQORPPKOVYSGPSGTPTSGN NNNKSYNPNRKSSYSOPOHVAMMTRGLHGPSAASSSPV IANNFVDPVSSGTPYSSNSS
601 RFSOOIPSOOYMHTVKPTSRKNRSSVMPNIGYVPGLTNNEYGRKFN GNGMNGTOSRLNLSLSNOSTFRSOOGPPITOOKSFONNGGSMRTNRI PSANYNIS
701 NOQSGFVNSISSPNLSNLENRNTVONSRNADSA PCVNOLNSDSPPOLOSLSONGTSKVPQINITQPSP IQTNFATSDNPAAVIKLGT PSEDTVSAAATAN
801 NISTMGDESRKEDVKEKKKKKFSFFGKRKK
  
```

# UBP3

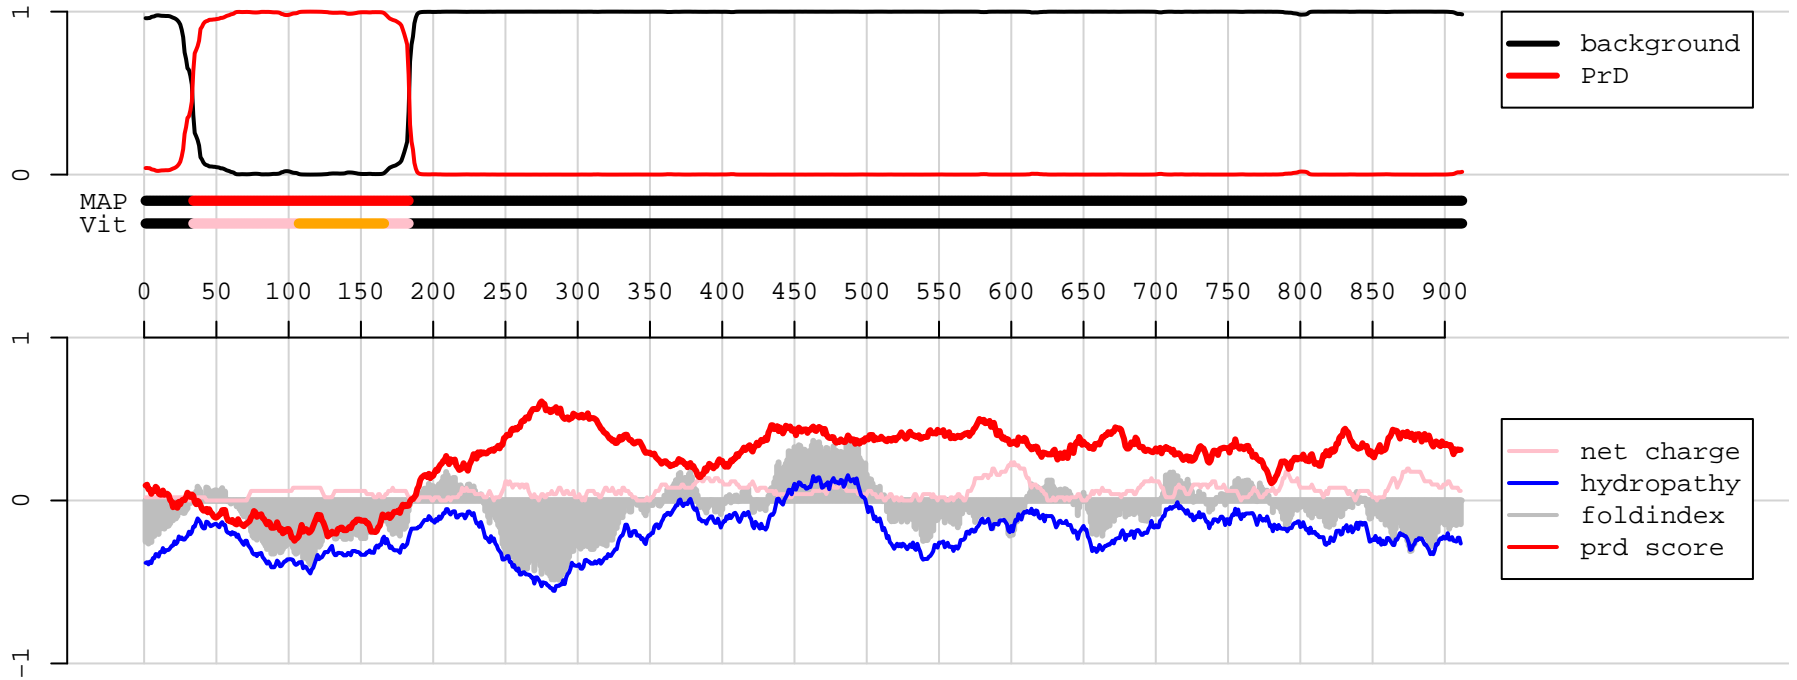

1 MNMQDANKEESYSMPKTSPPPTPTNMQIPIYQAPLOMYGYTOAPYLYPTOIPAYSFNMVNONOPIYHOSGSPHLLPPONNINGGSTTNNNNINIKKKW  
 101 HSNGITNNNGSSGNOGANS SSGSGMSYNKSHTYHHNYSNNHIPMMASPNSSGNSNAGMKKOTNSSNGNGSSATSPSYSSYNSSSOYDLYKFDVTKLKNLKENS  
 201 SNLIQLPLFINTTEAEFAAASVQRYELNMKALNLSSELENS SVEKSSAHHTKSHSIPKHNEEVKTETHGEEEDAHDKKPHASKDAHELKKKTEVKKED  
 301 AKQDRNEKVIQEPQATVLPVVDKKEPEESVEENTSKTSSPSPSPPAAKSWSAIASDAIKSRQASNKTVSGSMVTKTPISGTTAGVSSTNMAAATIGKSSS  
 401 PLLSKQPQKKDKKYVPPSTKGIPLGSIALRMCFDPDFISYVLRNKDVENKIPVHSIIPRGIINRANICFMSSVLQVLLYCKPFIDVINVLSTRNTNSRV  
 501 GTSSCKLLDACLTMYKQFDKETYEKKFLENADDAEKTTESDAKSSKSKSFQHCATADAVKPDEFYKTLSTIPKFKDLOWGHQEDAEEFLTHLLDQLHEE  
 601 LISAI DGLTDNEIQNMLQSINDEQLKVFFIRNLSRYGKAEFIKNASPRLKELIEKYGVINDDSTEENGWHEVSGSSKRGKKTAKARTVEIVPSPISKL  
 701 FGGQFRSVLDIPNNKESQSITLDPFQTIQLDISDAGVNDLETAFFKFFSEYELLPFKSSSGNDVEAKKQTFIDKLPQVLLIQFKRFSFINNVNKNAMTNY  
 801 NAYNGRIEKIRKKIKYGHელიIPEESMSSITLKNNTSGIDDRYKLTGVIYHHGVSSDGGHYTADVYHSEHNKWRIDDVNITELEDDDLVKGGEASDS  
 901 RTAYILMYQKRN

# NAF1

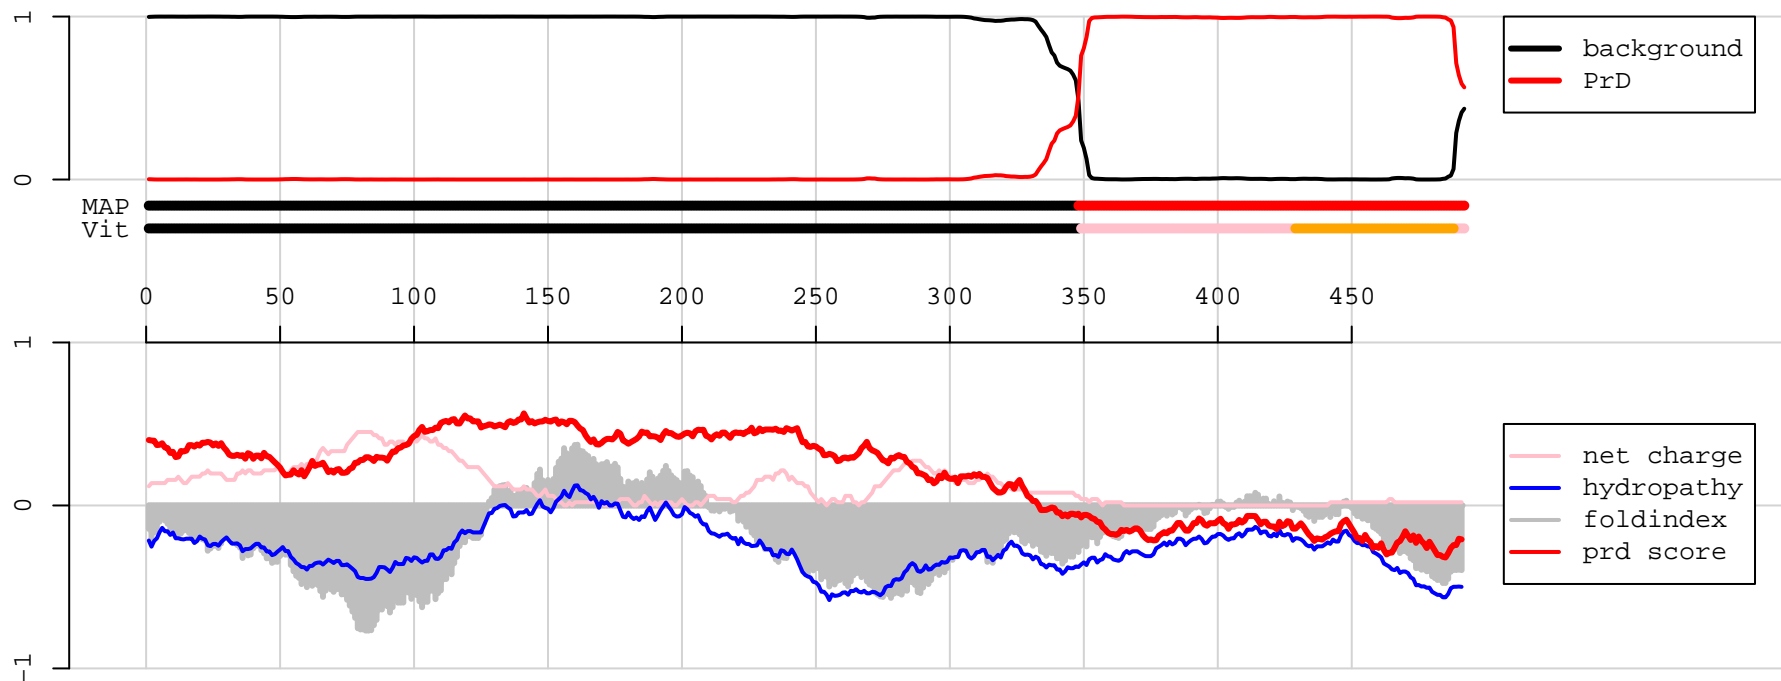

1 MSDDLFSKALENPDQDLNVELPKDDVDLGLLGDGGNERKTDEPVADAERSTGLGSGSSESESDSGSDSDSDSGSSGSEDDSDADQDVEGEDEGGDAIENED  
 101 EDEDPSPSGPILSKNEILEETVPELPEDYEISEKTIITPIGVLKSFAFENIIHATMSGEKRVLKEGSIFCLEDRTLIGMLTEVFGPLQNPFYRIKLPDS  
 201 KKNLFDDELKVRLGEKAFIVTPDAHWIDTFELKRNKGTASNGYDEELPEEEQEFSDDEKEALFKMKKKQORQRKKRDNRKLANDSDNVKVKRARQPKANS  
 301 LPKLVPPGLMSSNAPMQHGYKSRNARENINIKRESSATSNRNGSSPVPITOHHQOQFSANNYPFPOOPNGMPYPYSPFPOPTNFOYPPPPFGOATPAOFSN  
 401 TVPYGSLPPAYNNMSPPTOOSFMPMTOSOPPLPYGVPPMNOMONPMYIOPPPOAPPQNGNFOOVMELHOILL000000HOYOHOHODPRT

# SEC9

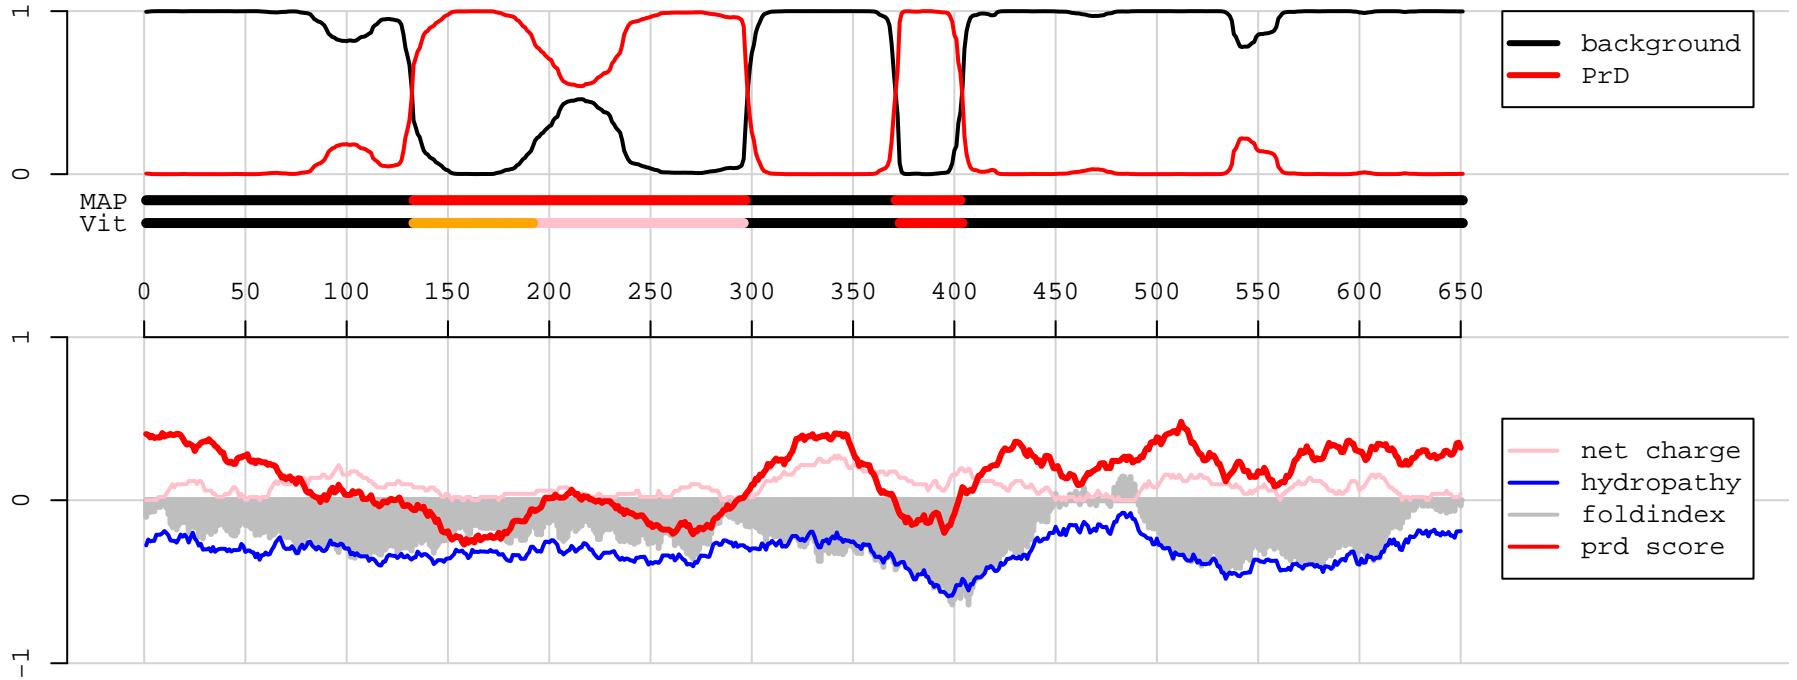

```

1  MGLKKFFKIKPPEEATPEQNKDTLMELGISVKNPSKKRKEKFAAYGKFANDKAEDKVYAPPGYEQYARPQDELEDLNASPLDANANEATAGSNRGSSGTO
101 DLGNGAESNSMODPYAIENDDDYRYDDDDPYARFQANKSNGRGVSNAAPYGDYGGGYNGTSLNSYNNDGPYSNONTSNSWVNANGRNSLNHSNSTLNVGPSR
201 OTROPPVSTSTNSLSLDQRSPLANPMOEKRNPNYADMNSYGGAYDSNTNRSSGTROGSSKNANPYASMANDSYSGNLNRSANPYSSRSVROPOSQOAPMT
301 YTPSFIASDEAARNSEVDLNEEPTGEFDFEEVYADKSAENRAALDEPDLNAVMTNEDSIDLNASEVDHSSRQQQQQQWFMDEQQQQQHFNATTNNOYGD
401 QRGYKTFEEIQKEEEARQQQQEEDEAVDEIKQEIKFTKQSSVASTRNTLKMAQDAERAGMNTLGMLGHQSEQLNNVEGNLDLMKVQNKVADEKVAELKKLN
501 RSILAVHVSNPFNSKRRRREREEQLKNRKIEEKLMREOTSQOLSOSTORIEGAMNANNNISEVRERYQRKNVLEKAKRYQFENDEEDDEMELEIDRNLDQ
601 IQQVSNRLKKMALTTGKELDSQQKRLNNIEESTDDLDINLHMTNRLAGIR

```



# LSB1

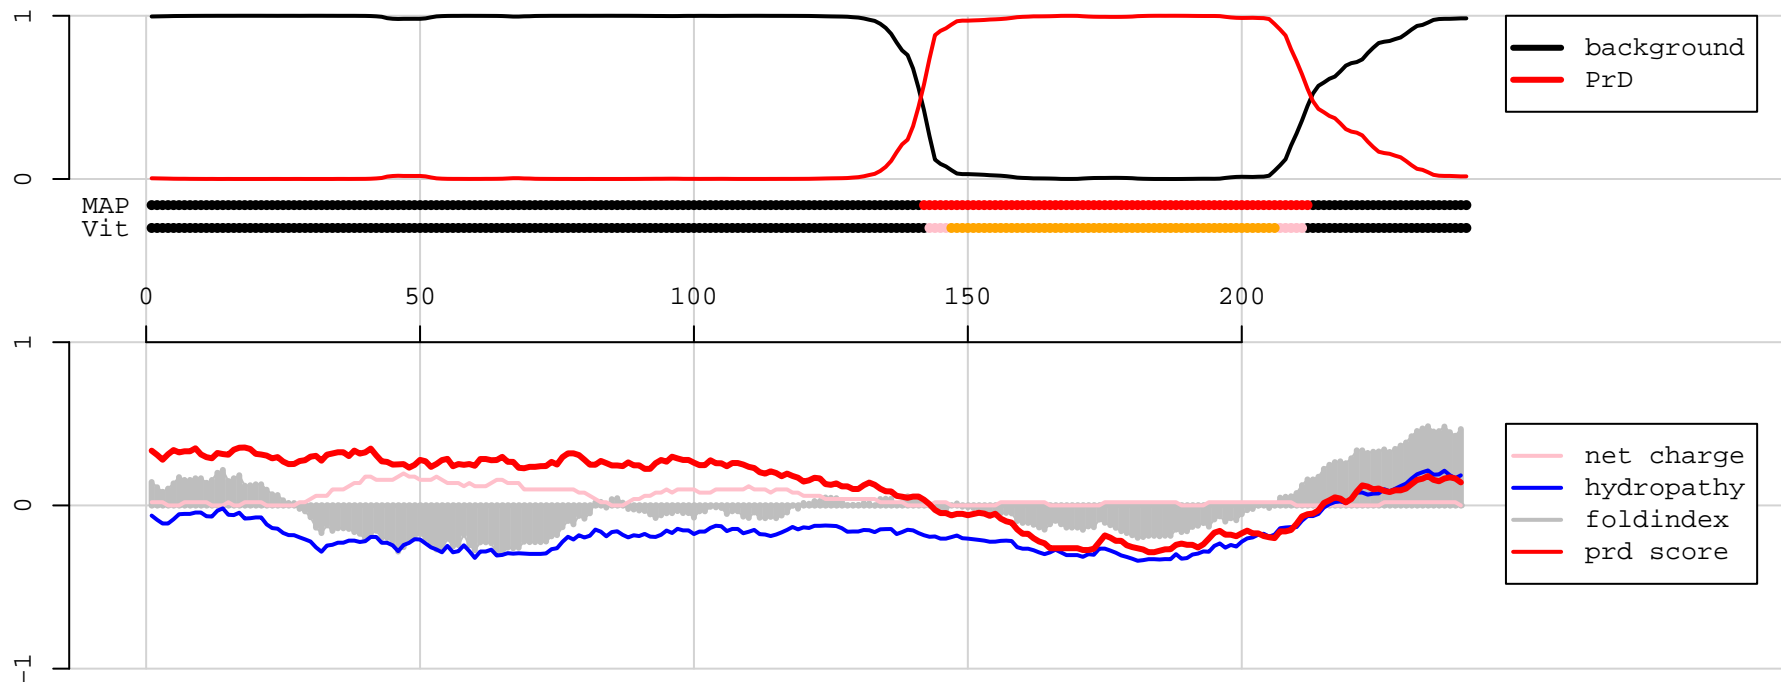

1 MSASLVNRSLKNIRNELEFLKESNVISGDIFELINSLKLPKWDGNQRSPQNADTEEYVEALYDFEAQODGDLSLKTGDKIQVLEKISPDWYRGKSNKIG  
 101 IFPANYVKPAFTRSASPKSAEAASSSTVSRPSVPPPSYEPAASOYPSOOVSAPYAPPAGYMOAPPPPOOOOAPLPYPPPFTNYYOOPOOOYAPPSOOAPVE  
 201 AOPQOSSGASSAFKSFFGSKLGNAAIFGAGSAIGSDIVNSIF

# GRE1

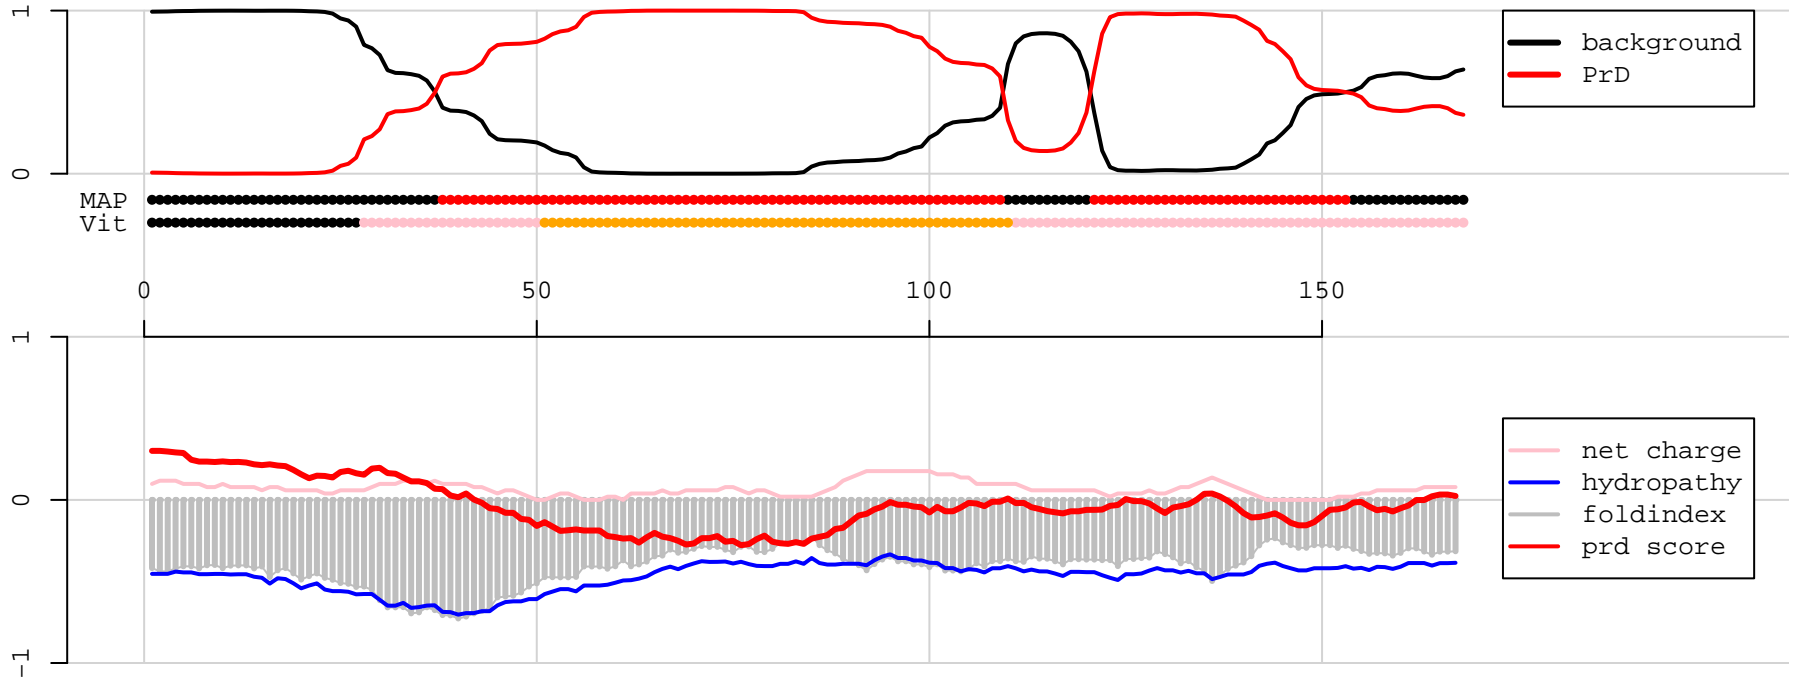

1 MSNLLNKFADKLGNDHDERYEDDND~~OTROORHEKHOOREFRNOGSKADPYGEEENOGNFPOROPOSNLGGNT~~~~OFFGGNDFOOOTTDYT~~~~AGTGGGTYTOT~~  
 101 ~~YRETNTOGQL~~~~DDDEDDDFLT~~~~SGOOOKOGRTRGAOSNRYOSSNIGSGRRDL~~~~SGSGNDEYDDDSGN~~~~OGVW~~

# SLF1

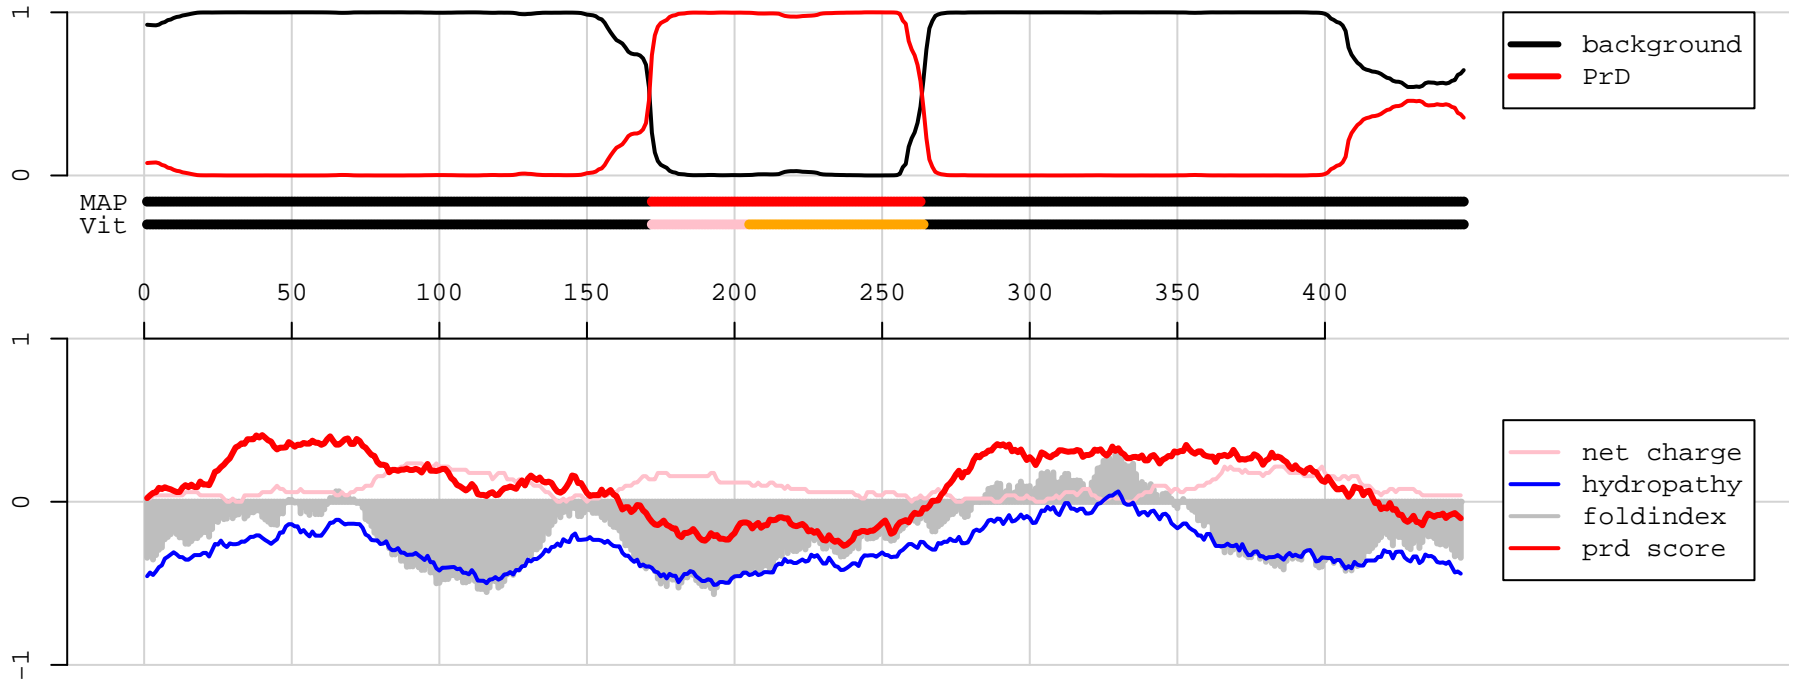

1 MSSQNLNDNPKNTSSAAEDKKKQTSSLKLAPIPTTSPWKSSSPDSNTVIPVEELRDISKTAKPSKNGSGSIKLTSTNKWTPITPSVIIISGSKDTNSKSGK  
 101 NSKNSKTNKKMKRGGKYNNNDINKKDFNGQTNSTSEISNVSNLESKPLDANAKVNIHSSSGATANGNIKRITNNNNSTNGROSRNYONRNGKTRYNNNSRH  
 201 SOAANNAISFPNNYQARPEYIPNASHWLNNNNSRNSYKOLSYFROOQYNNINYOQLOTPYYYSMEPIFKSIESIKNOIEFYFSEENLKTDEFLRSKFKK  
 301 ANDGFIPMSLIGKFYRMVNLSLGGDPNLILASMREVLQHKETNHLEIALGSIEGAQKNMADDFNPLENYFIRRENWAEYAMESNFDENDDETEKYNIEKL  
 401 LGPNLDNYSYMGYPNFFPSNENGGKSOSYDOGEISROFEONLOIND

# PAB1

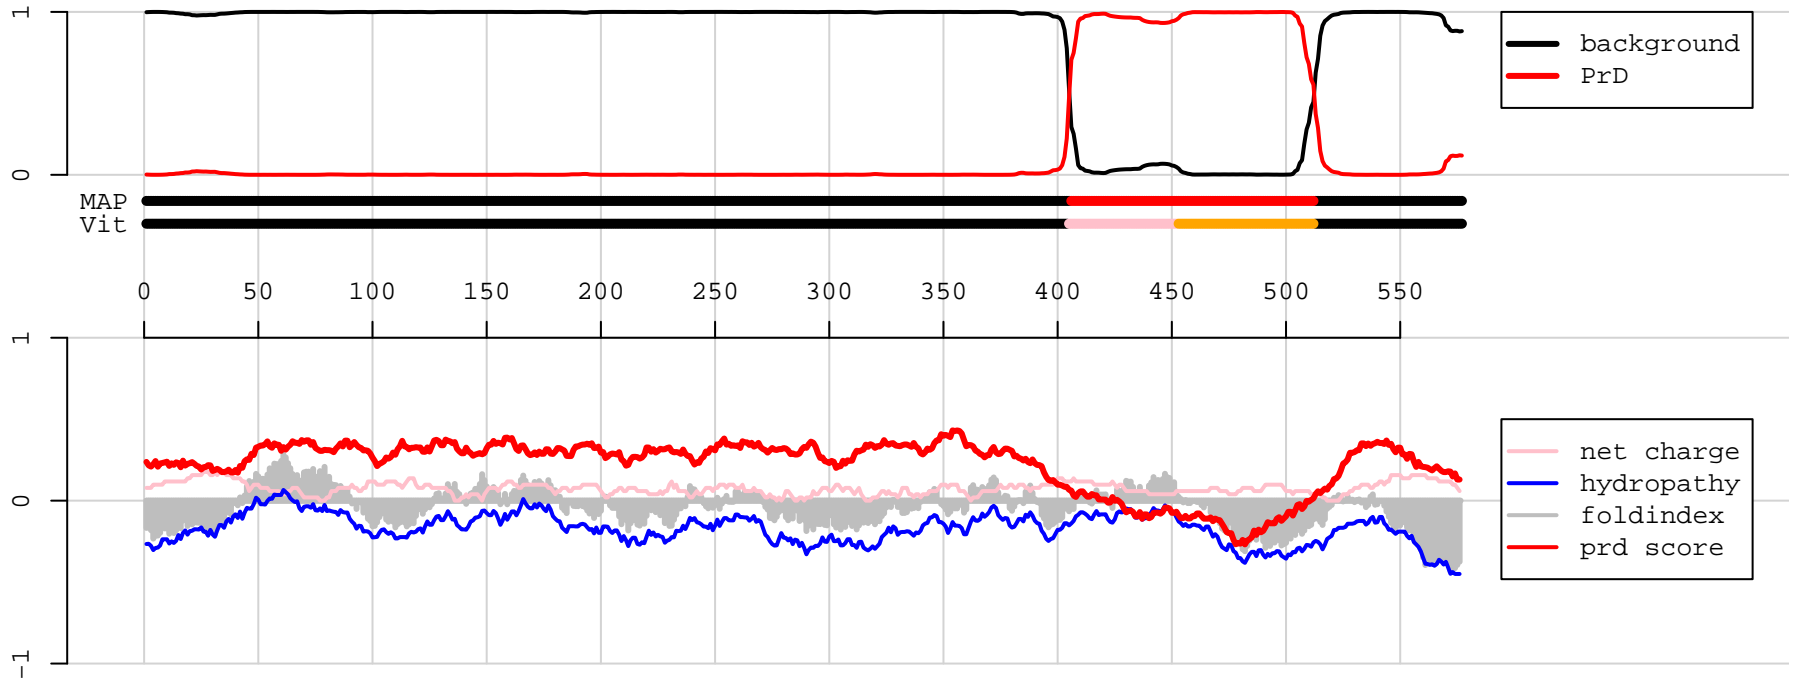

1 MADITDKTAEQLENLNIQDDQQAATGSESQSVENSSASLYVGDLEPSVSEAHLYDIFSPIGSVSSIRVCRDAITKTS LGYAYVNFNDHEAGRKAIEQLN  
 101 YTPIKGRLCRIMWSQRDPSLRKKGSGNIFIKNLHPDIDNKALYDTFSVFGDILSSKIATDENGKSKGFGFVHFEEEGAAKEAIDALNGMLLNQOEIYVAP  
 201 HLSRKERDSQLEETKAHYTNLYVKNINSETTDEQFQELFAKFGPIVSASLEKDADGKLGFGFVNYEKHEDAVKAVEALNDSELNGEKLYVGRAQKNER  
 301 MHVLKKQYEAYRLEKMAKYQGVNLFVKNLDDSDVDEKLEEEFAPYGTITS AKVMRTENGKSKGFGFVCFSTPEEATKAITEKNQOIVAGKPLYVAIAQRK  
 401 DVRRSOLAQQIQARNQMRYPQATAAAAAAAAAAGMPGOFMPPMFYGVMPPRGVPFNGPNPQOMNPMGGMPKNGMPPQFRNGPVPYGVPPOGGFPRNANDNNQF  
 501 YOOKOROALGEOLYKKVSAKTSNEEAAGKITGMILDLPPQEVFPLLESDELFEQHYKEASAAYESFKKEQEEOQTEQA

# GSC2

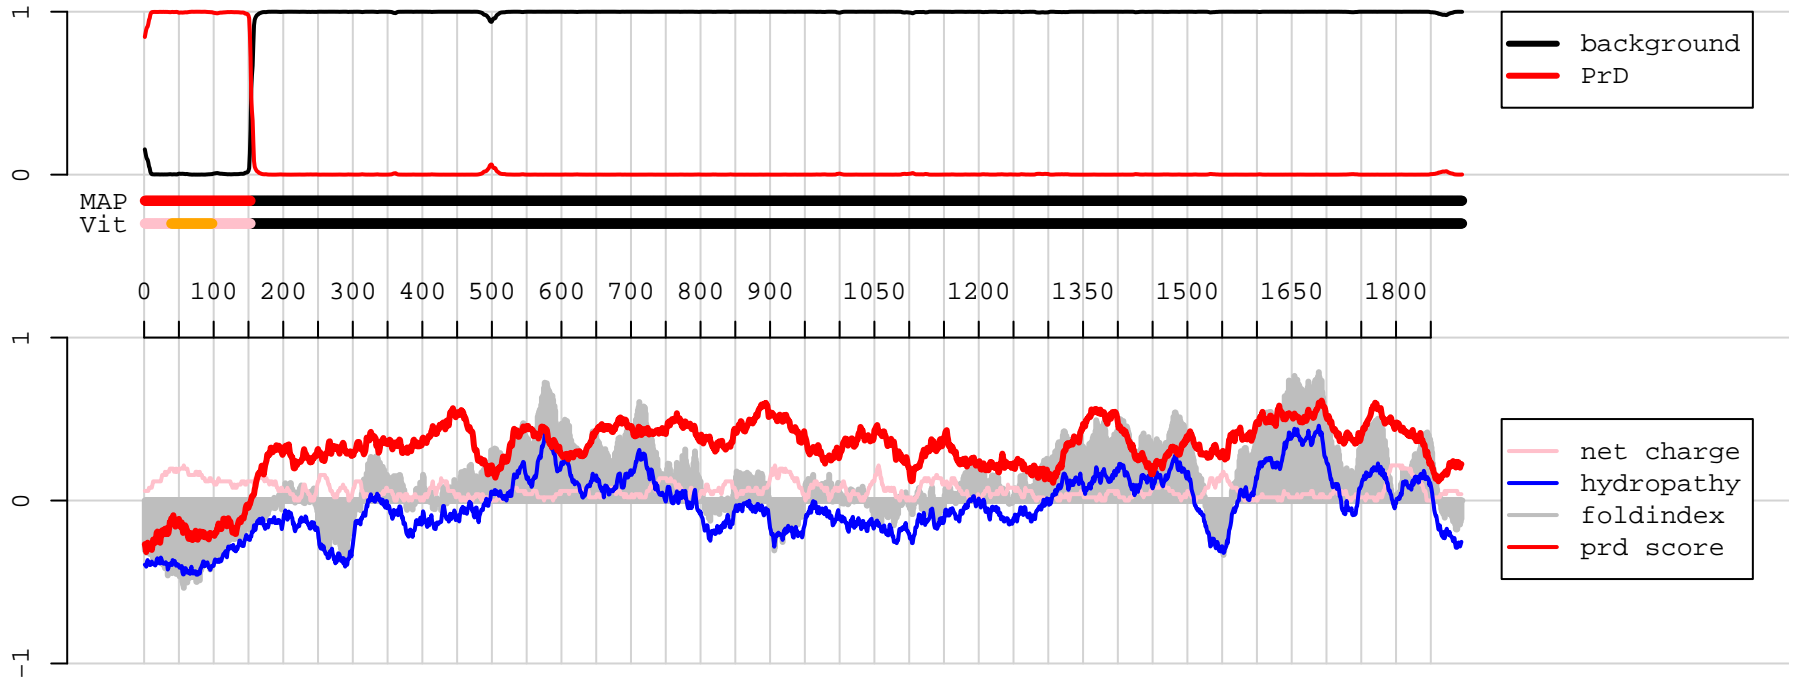

1 MSYNDPNLNGOYYSNGDGTGDGNYPTYOVTTODOSAYDEYGOPIYTONQLDDGYYPDNEOYVDGTQFPOGODPSODOGPYNNNDASYNOPPNMMNPSSODG  
 101 ENFSDFSSYGPPSGTYPNDQYTPSOMSYPDODGSSGASTPYGNGVNVNGNGOYYDPNAIEMALPNDPYPAWTADPOSPLPIEQIEDIFIDLTKNKGFORDS  
 201 MRNMFDFHMTLLDSRSSRMSPEQALLSLHADYIGGDTANYKKWYFAAQLDMDDEIGFRNMKLGKLSRKARKAKKKKAMQEASPEDTEETLNQIEGDNS  
 301 LEAADFRWKS KMNQLSPFEMVRQIALFLLCWGEANQVRFTPECLCFIYKASDYLD SAQCQQRPDPLPEGDFLNRVITPLYRFIRSOVYEIVDGRYVKSE  
 401 KDHNKVI GYDDVNQLFWYPEGIAKIVMEDGTRLIDLPAEERYLKLGEIPWDDVFFKTYKETRSWLHLVTNFNRIWIMHISVYWMYCAYNAPT FYTHNYQQ  
 501 LVDNQPLAAYKWATAALGGTVASLIQVAATLCEWSFVPRKWAGAQHLSRRFWFLCVIMGINLGPVIFVFAYDKDTVYSTAAHVVGAVMFFVAVATLVFFS  
 601 VMPLGGLFTSYMKKSTRSYVASQTFTASFAPLHGLDRWMSYLVWVTVFAAKYAESYFFLILSLRDP IRIILSTTSMRCTGEYWWGNKICKVQPKIVLGLMI  
 701 ATDFILFFLD TYLWYIVVNTVFSVGKSFYLGISILTPWRNIFTRLPKRIYSKILATTDMEIKYKPKVLISQIWNAI IISMYREHLLAIDHVQKLLYHQVP  
 801 SEIEGKRTL RAPTFVFSQDDNNFETEFFPRDSEAERRISFFAQSLSTPIPEPLPVDNMPTFTVLT PHYAERILLSLREI IREDDQFSRVTLLEYLKQLHP  
 901 VEWDCFVKD TKILAEETAAYENNEDEPEKEDALKSQIDDLPFYCIGFKSAAPEYTLRTRIWASLRSQTLYRTISGFMNYSRAIKLLYRVENPEIVQMFGG  
 1001 NADGLERELEKMARRKFKFLVSMQRLAKFKPHELENAEFLLRAYPDLOIAYLDEEPLNEGEEPRIYSALIDGHCEILENGRRRPFKFRVQLSGNPILGDG  
 1101 KSDNQNHALIF YRGEYIQLIDANQDNYLEECLKIRSVLAEFEELGIEQIHPYTPGLKYEDQSTNHVPVAIVGAREYIFSENSGVLGDVAAGKEQTFGTLFA  
 1201 RTLAQIGGK LHYGHPDFINATFMTTRGGVSKAQKGLHLNEDIYAGMNAVL RGGRIKHCEYYQCGKGRDLGFGTILNFTTKIGAGMGEQMLSREYYLGTQ  
 1301 LPIDRFLTFY YAHPGFHLNLF IQLSLQMFMLTLVNLHALAHESILCVYDRDKPITDVLVPIG CYNFHPAIDWVRRYTL SIFIVFWIAFVPIVVQELIER

# SRO9

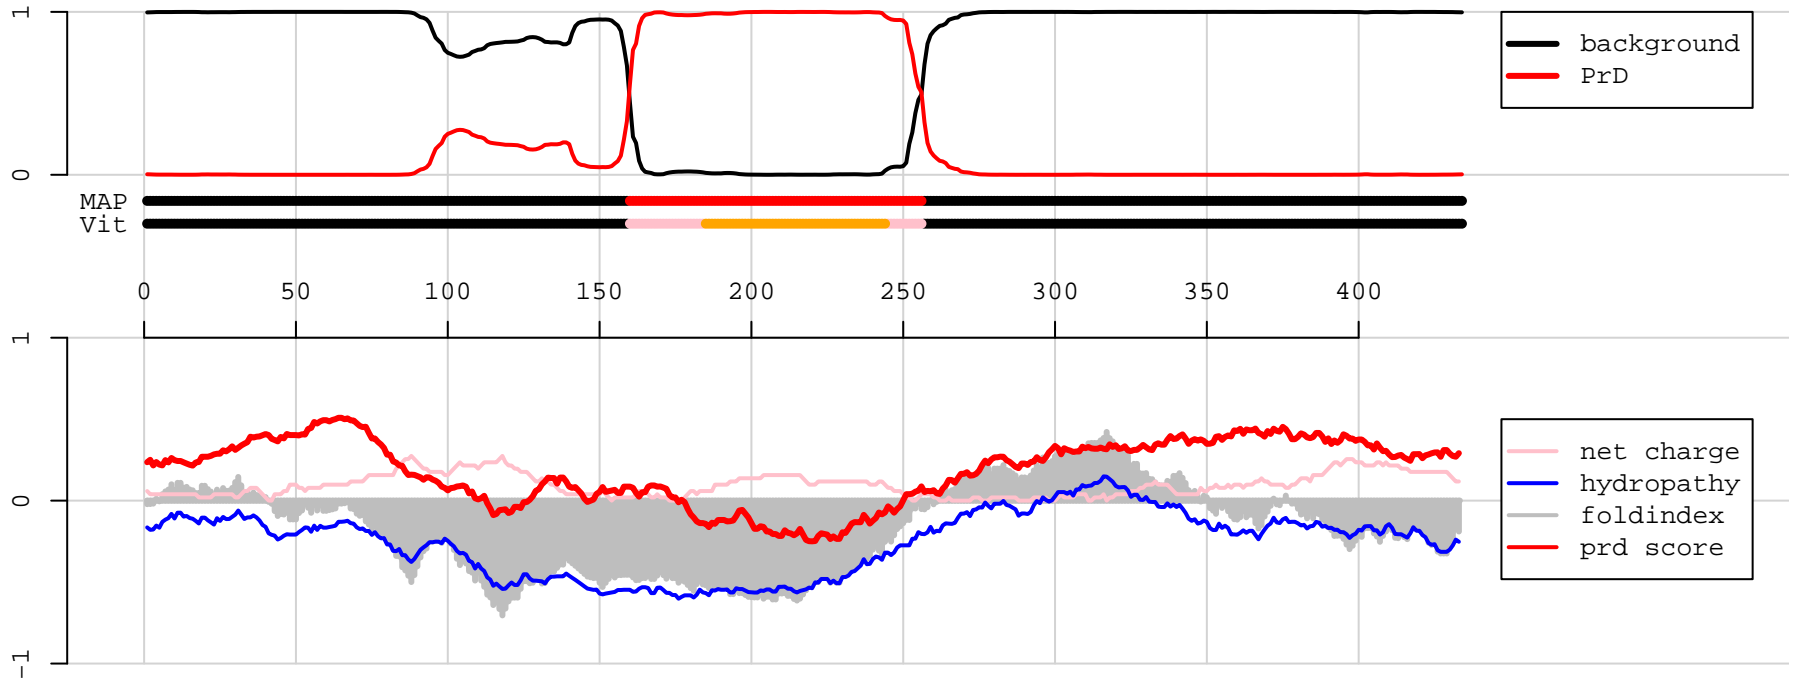

1 MSAETAAANTATAPVPEVQEQESSKSKQVNLTPAPLPTSSPWKLAPTEIPVSTISIEDLDATRKKKNRTPTPKSSTATKWVPIKASITVSGTKRSGSKNG  
 101 ASNGNSNKSKNNKTAASSTSSSNANRKKKHQHNAKKQOQMKKDGFE~~SAVGEEDSKDAT~~SOENGOSTOOOOPPHHRNHHHSHHHNSNGPQRKFFHNSNNA  
 201 GMPONOGFPPOFKPYOGRNARNNNNNNRSKYHNNHFHHNOQHPOOPMVKLOOQFYVOPVLM~~AINNIARQIEYYFSEENL~~TVDNYLRSKLSKDGFAPLSLIS  
 301 KFYRVVNMSFGGDTNLILALREIVANEAAATVNVAEGTLAAKEGDNVTGEAKEPSPLDKYFVRSKSWSNWLPETFETEINIEKELVGDALDQFMISLPPV  
 401 PQOEEESSTELASQEQETKEDSAPVAAGESESSL

# SWI4

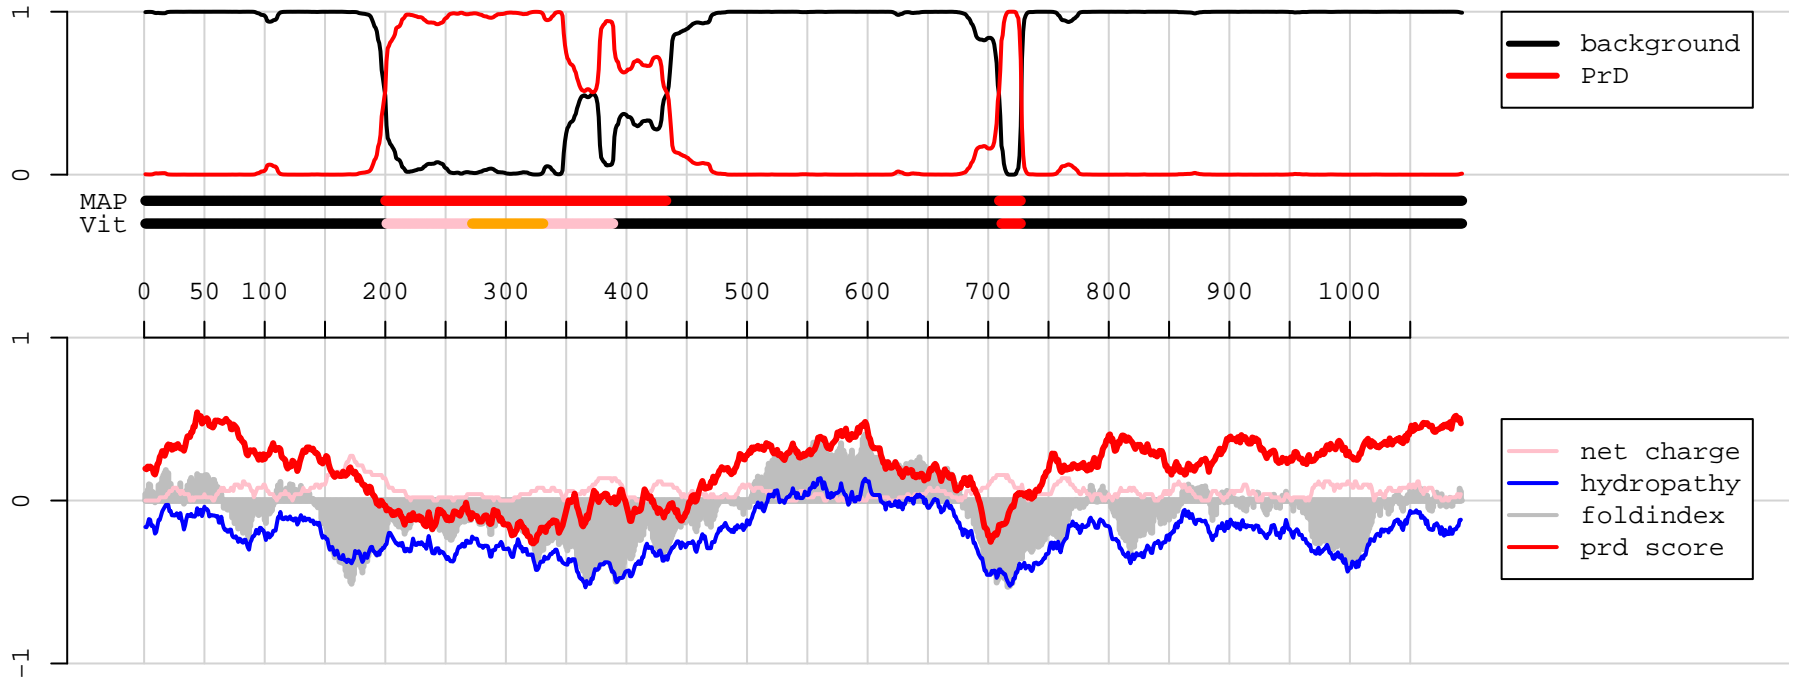

1 MPFDVLI SNQKDNTNHQNITPI SKSVLLAPHSNHPVIEIATYSETDVYECYIRGFETKIVMRRTKDDWINITQVFKIAQFSKTKRRTKILEKESNDMQHEK  
 101 VGGYGRFQGTWIPLDSAKFLVNKYEIIDPVVNSILTFQFDPNPPPKRSKNSILRKTSPGKITSPSSYNKTPRKKNSSSSTSATTTAANKKGKKNASI  
 201 NOPNPSPLONLVFOTPOOFVNSSMNI MNNDNHTTMMFNNDTRHNLINNI SNNSNOSTIIOOKSIHENSFNNNYSATQKPLOFFPIPTNLONKNVALN  
 301 NPNNDNSNSYSHNIDNVINSNNNNNGNNNNLILVDPGPMOSOOOOHHHEYLTNNFNHSMMDSLTNGNSKRRRKL NOSNEQOFYNOOEKIQRHFKLMK  
 401 OPLLWOSFONPNDHHNEYCDSNGSNNNNNTVASNGSSIEVFSSNENDNSMNMSSRSMT PFSAGNTSSONKLENKMTDQYKQTI LTISSERSSDVDQAL  
 501 LATLYPAPKNFNINFEIDDQGH TPLHWATAMANIPLIKMLITLNANALQCNKLGFCITKSI FYNNCYKENAFDEIISILKICLITPDVNGRLPFHYLIE  
 601 LSVNKSKNPMI IKSYSMDSIILSLGQQDY NLLKICLN YQDNIGNTPLHLSALNLNFEVYNRLVYLGASTDILNLDNESPASIMNKFNTPAGGSNSRNNNTK  
 701 ADRKLARNLP **OKNYY**OOOOOOO **PONNV**KIPKIIKTQHPDKEDSTADVNI AKTDSEVNESOYLHSNQP NSTNMNTIMEDLSNINSFVTSSVIKDIKSTPS  
 801 KILENSPILYRRRSQSISDEKEKAKDNENQVEKKK DPLNSVKTAMP SLES PSSLPIQMSPLGKYSKPLSQQINKLNTKVSSLQ RIMGEEIKNLDNEVVE  
 901 TESSISNNKRLITIAHQIEDAFDSVSNKTPINSISDLQSR IKETSSKLNSEKQNF IQSLEKSQALKLATIVQDEESKVDMMNTNSSSHPEKQEDEEPIPK  
 1001 STSETSSPKNTKADAKFSNTVQESYDVNETLRLATELTILQFKRRMTTLKISEAKSKINSSVKLDKYRNLIGITIEINIDSKLDDIEKDLRANA

# DHH1

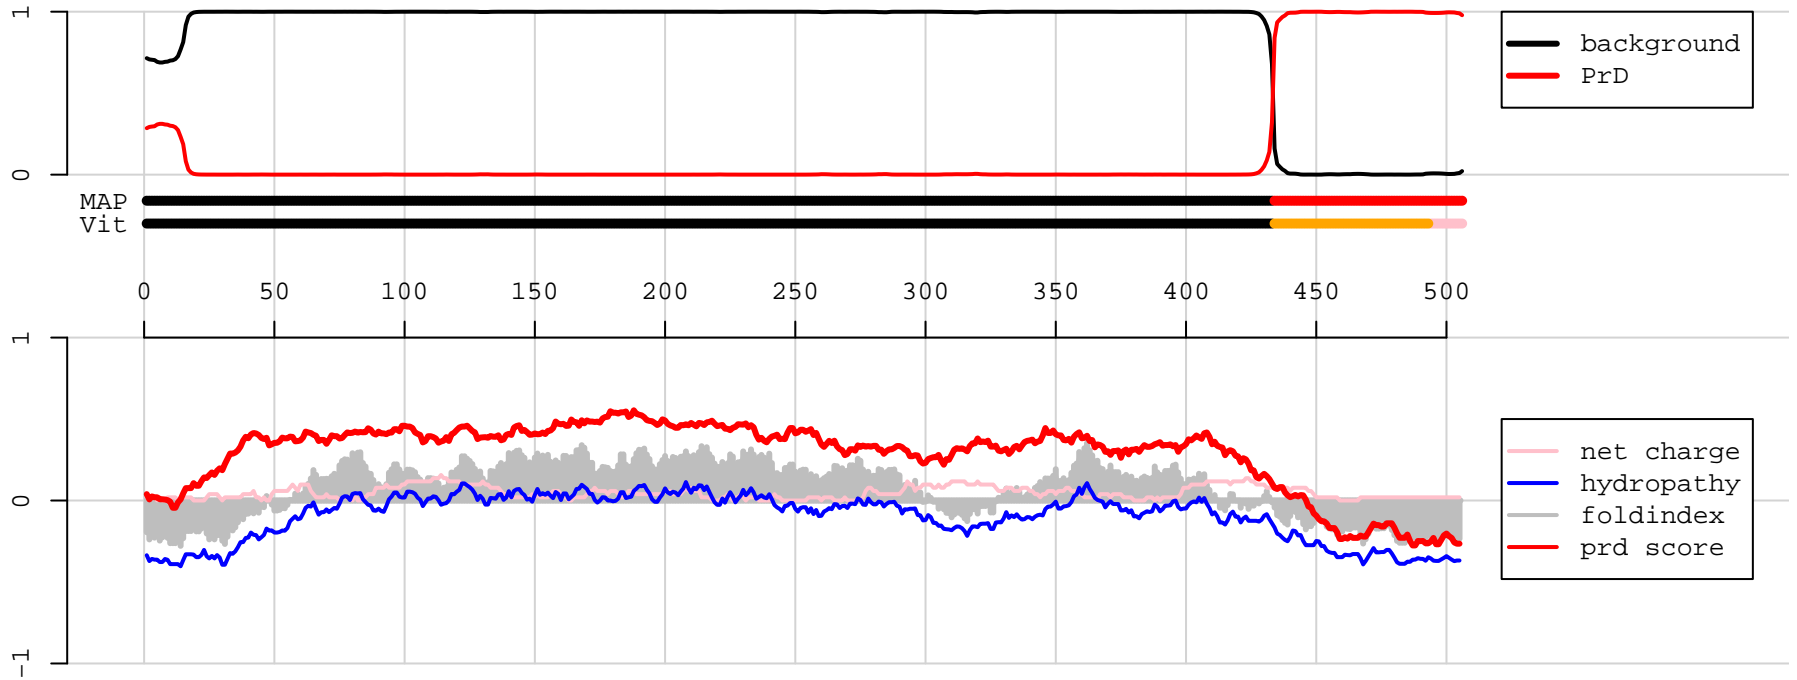

1 MGSINNNFNTNNNSNTDLDRDWKTALNIPKKDTRPQTDDVLNTKGNTFEDFYLKRELLMGIFEAGFEKPSPIQEEAIPVAITGRDILARAKNGTGKTAAF  
 101 VIPTLEKVKPKLNKIQALIMVPTRELALQTSQVVRTL GKHCGISCMVTTGGTNLRDDILRLNETVHILVGTPGRVLDLARKVADLSDCSLFIMDEADKM  
 201 LSRDFKTIIEQILSFLPPTHQSL LFSATFPLTVKEFMVKHLHKPYEINLMEELTLKGITQYYAFVEERQKLHCLNTLFSKLQINQAIIFCNSTNRVELLA  
 301 KKITDLGYSCYYSHARMKQOERNKVFHEFRQGKVRTLVCSDLLTRGIDIQAVNVVINFDFPKTAETYLHRIGRSGRFGHLGLAINLINWDRFNLYKIEQ  
 401 ELGTEIAAIPATIDKSLYVAENDETVPVFPPIE QOSYHQQAIPQOOLPSOOQFAIPPOOHHPOFMVPPSHOQQOAYPPPOMPSSOOGYPPOOEHFMAMPPG  
 501 QSOPOY



# FKS1

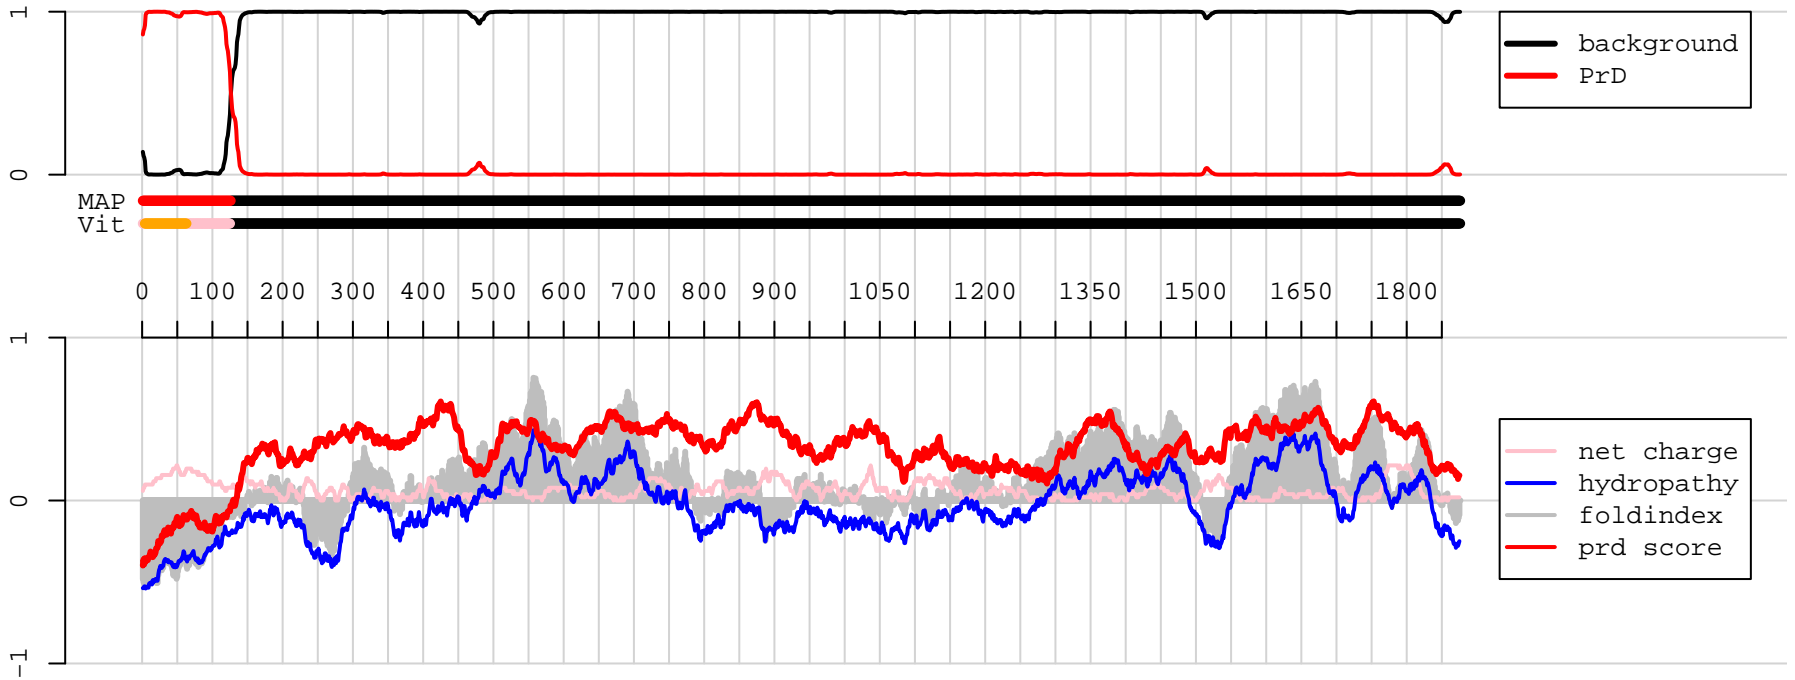

1 MNTDOOPYOGOTDYYTGGPNGGOSOEODYDOYGOPLYPSOADGYDNPVAAGTEADMYGOOPPNESYDODYTNGEYYGOPPNMAAODGENFSDFSSYGPPG  
 101 TPGYDSYGGOYTASOMSYGEPNSSGTTSTPIYGNYPNAIAMALPNEYPAWTADSQSPVIEQIEDIFIDLTNRLGFQRDSMRNMFDHFMVLLDSRSSRM  
 201 SPDQALLSLHADIGGDTANYKKWYFAAQLDMDEIGFRNMSLGKLSRKARKAKKKNKKAMEEANPEDTEETLNKIEGDNSLEAADFRWKAKMNQLSPLE  
 301 RVRHIALYLLCWGEANQVRFTAELCFIYKCALDYLDSPLCQQRQEPMEGDFLNRVITPIYHFIRNOVYEIVDGRFVKRERDHNKIVGYDDLNQLFWYP  
 401 EGIAKIVLEDGTKLIELPLEERYLRLDVWDDVFFKTYKETRTWLHLVTNFNRIWVMHISIFWMYFAYNSPTFYTHNYQQLVDNQPLAAYKWASCALGG  
 501 TVASLIQIVATLCEWSFVPRKWAGAHLSRRFWFLCIIFGINLGPIIFVFAYDKDTVYSTAAHVVAAMFFVAVATIIFFSIMPLGGLFTSYMKKSTRY  
 601 VASQTFTAAAFAPLHGLDRWMSYLVWTVFAAKYSESYFFLVLSLRDPIRILSTTAMRCTGEYWWGAVLCKVQPKIVLGLVIATDFILFFLDTYLWYIVN  
 701 TIFSVGKSFYLGISILTPWRNIFTRLPKRIYSKILATTDMEEKYKPKVLISQVWNAIIISMYREHLLAIDHVQKLLYHQVPSEIEGKRTLRAPTFFVSQD  
 801 DNNFETEFFPRDSEAERRISFFAQSLSTPIPEPLPVDNMPTFTVLTPHYAERILLSREIIREDDQFSRVTLLEYLKLHPVEWECFVKDTKILAEETA  
 901 YEGNENEAEKEDALKSQIDDLPFYCIGFKSAAPEYTLRTRIWASLRSQTLYRTISGFMNYSRAIKLLYRVENPEIVQMFGGNAEGLERELEKMARKKFKF  
 1001 LVSMQRLAKFKPHELENAEFLLRAYPDLQIAYLDEEPPLTEGEEPRIYSALIDGHCEILDNGRRRPFFRVQLSGNPILGDGKSDNQNHALIFYRGEYIQ  
 1101 IDANQDNYLEECLKIRSVLAEFEELNVEQVNPYAPGLRYEEQTTNHPVAIVGAREYIFSENSGVLGDVAAGKEQTFGTLFARTLSQIGGKLHYGHPDFIN  
 1201 ATFMTTRGGVSKAQKGLHLNEDIYAGMNAMLRGGRIKHCEYYQCGKGRDLGFGTILNFTTKIGAGMGEQMLSREYYLGTQLPVDRFLTFYYAHPGFHLN  
 1301 NLFIQLSLQMFMLTLVNLSSLAHESIMCIYDRNKPKTDVLPIGCYNFQPAVDWVRRYTLSIFIVFWIAFVPIVVQELIERGLWKATQRFFCHLLSLSPM

# PIN4

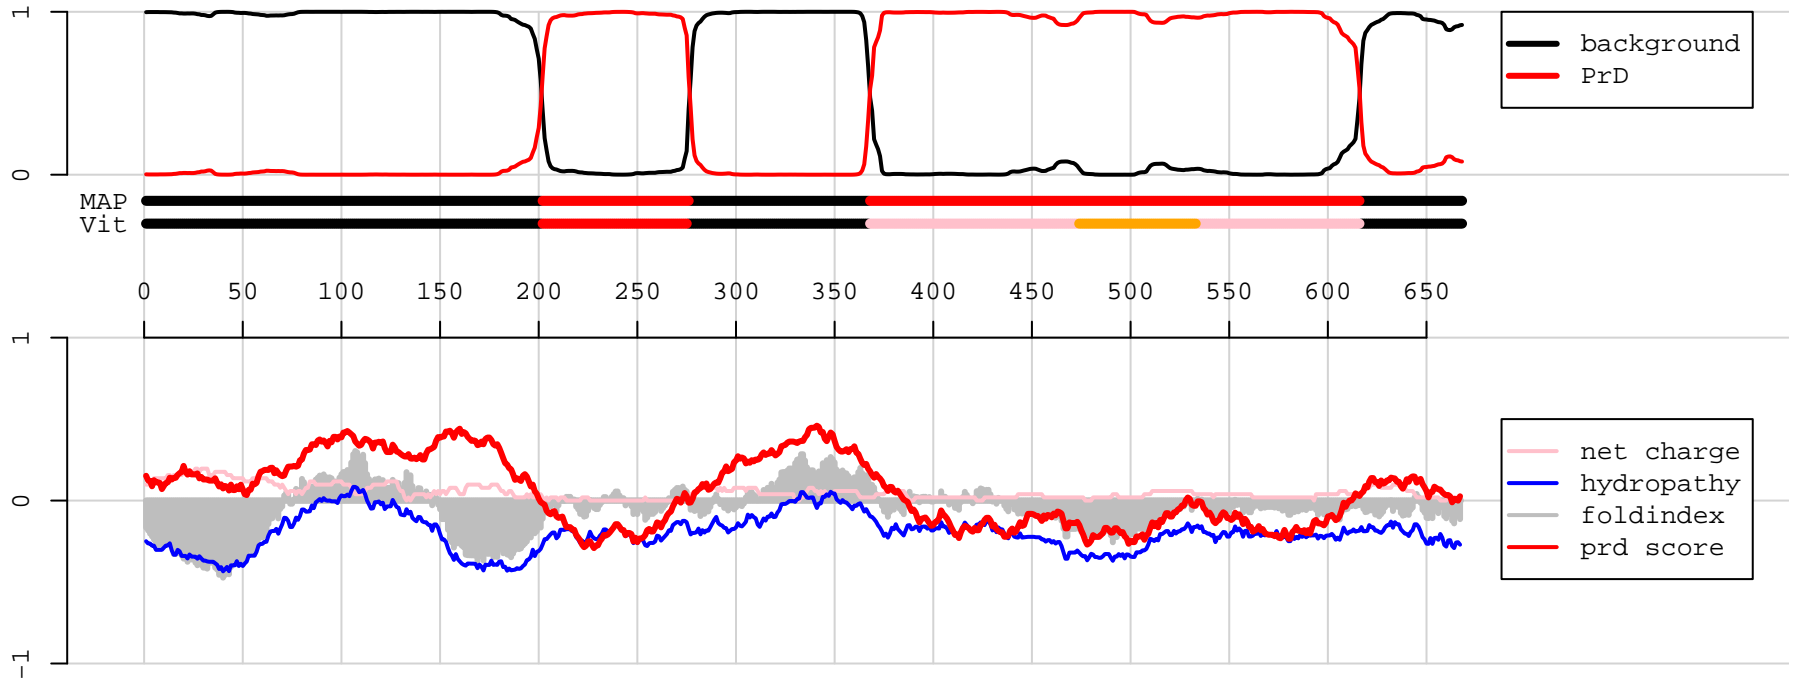

1 METSSFENAPPAAINDAQDNNINTETNDQETNQOSIETRDAIDKENGVQETETGENSAKNAEQNVSSTNLNNAPTNGALDDDVIIPNAIVIKNIPFAIKKEQ  
 101 LLDIIEEMDLPLPYAFNYHFDNGIFRGLAFANFTTPEETTQVITSLNGKEISGRKLVKEYKMLPOAERERIEREKREKRGQLEEQRSSSNLSLDLSLKS  
 201 MSGSGNNNTSNNQLFSTLMNGINANSMMNSPMNNTINNNSNNNNNSGNIILNQPSLSAQHTSSSLYQTNVNNQAQMSTERFYAPLPSTSTLPLPPQQLDF  
 301 NDPDTLEIYSQLLLFKDREKYYYELAYPMGISASHKRIINVLC SYLGLVEVYDPRFIIIRRKILDHANLQSHLQOQGOMTSAHPLOPNSTGGSMNRSOSY  
 401 TSLLOAHAAAAANSISNOAVNNSNSNTINSNNGNGNNVIINNNSASSTPKISSOGOFSMOPTLTSPKMNIHSSOYNSADOPPOPOPOTOONVOSAAOQ  
 501 QOSFLRQOATLTPSSRIPSGYSANHYOINSVNPILLRNSOISPPNSOIPINSOTLSOAOPPAOSOTOORVPVAYONASLSSOOLYNLNGPSSANSOSOLLP  
 601 OHTNGSVHSNFSYQSYHDESMLSAHNLSADLIYKSLSHSGLDDGLEQGLNRSLSGLDLQONQKKNLW

# EBS1

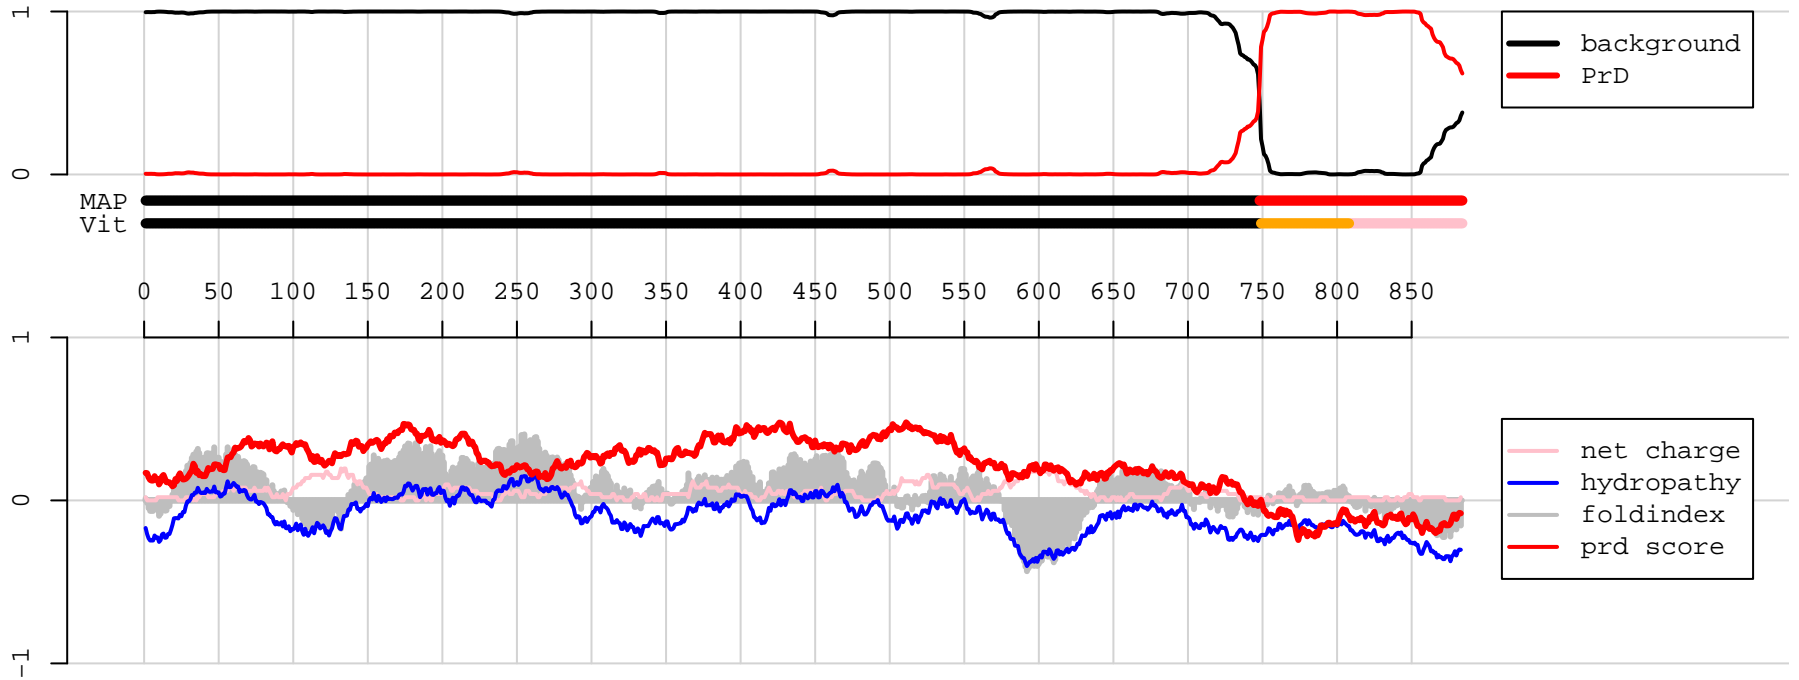

1 MEPSNTQKEDLPTAFNGIKSQLNSILKSNQLFQDYALLNGFLAFVHSKLNAAILTSIESQCGKSFaadLDSFDQSSISSILDFSWESVHYPIFKWFQMWR  
 101 NYILFEKENKKQOTKFIDFRKMNSKMLKFFKTVQNFYVNVINTVYKKYDISVLLPKRIIQDLKLSDIENTTNVGDILAVKTFNSSSPLAHLIPTLFHRCL  
 201 LFLGTAYRYKTLLEEISNKYSISNFKSLDFRLASLVLPsAGETYSQAGaIFLQTGNLGIaVFNfVKGMMTKMPSVSIKNFGALMVDNKSSLNRSLHT  
 301 TIMNTYLQESKGPRTPAKEILEFYFLGLFGSVWSPTSWRDdTKPNQLNNGIKLRHLENALYETMSARYLNNIKTIFHNLIITIGGFHLLLKRRSDVSAKT  
 401 LKDLRSNELDYLNFAFKYIAHILNDIVKESWSENPEVSEILGMVRIINCWIKANPMVLQYSQSNLEFVNALAYLINDIVKKKPSPSFSITEHIPKRTYWF  
 501 EEDLMVKGLSFVNFQLSDFDDYEKILEMDHSLDRLIGNPPLCDKLSASSEMLLRlQAVVNISSQLLQNNNCGVEWSDNKSRYIFNKKIGFKETVKNSMKT  
 601 SKQSNEKAKLQKKNKPSTTNGSISMADLERQMRSSSLDSFSPTMGYSGSSVPMAPDTFNVKPSGTITGNKVNVELLKIELSGQNADGAITNISPGYSNAA  
 701 ISSNSTDESSFDLNNILSSMOQKHAEKsFAKSMQGVNEQIPANDVCHOAORPMOGGLYSSOQPSSMSSLNSAYONASMPPSASMVSYYPFLNOOGQGV  
 801 FPPYNAQNLOWOSEAYSLKSMNFANPTWLGDOYOTSAPSSAYAQAOROMFOOPMOODVGKYMofPFDAOSNTDSMRGNSRNNMF

# NAB6

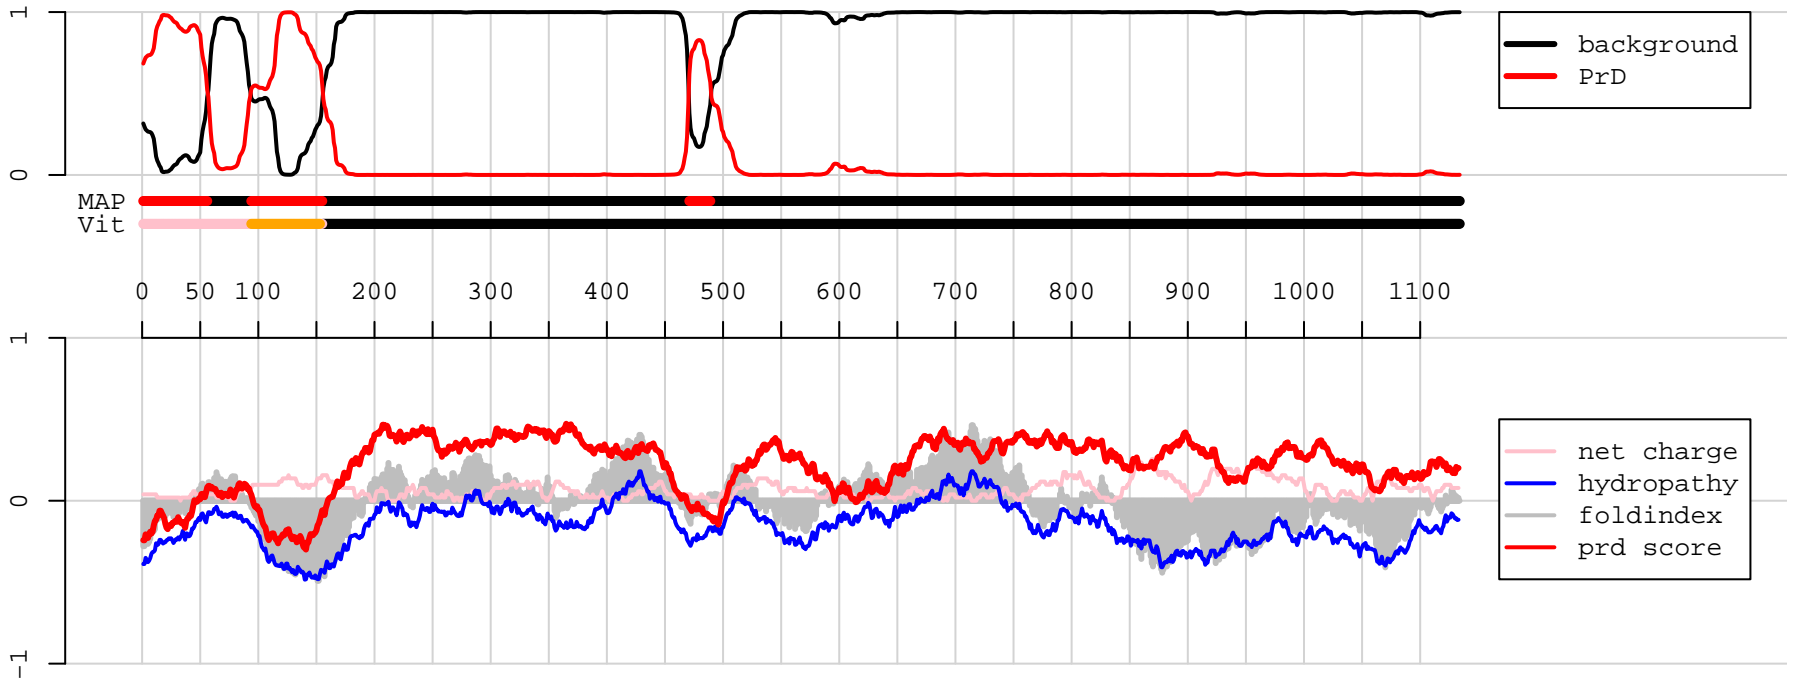

1 MSNSNSKKPVANYAYROODYNGMNAMVGNPMMYHPVDFVNGAGOYGPSQHPAYTNSPLPNIPTTPFDTAYGASLFPSHLLMGSPFVSSPNMQSGYNSA  
 101 RSSNLKRKAYSRPVSNHNGYNGNSNSNONNTNNGMVTPSNYYRMGRNSFSRNNNSTRNVTHNNKGC~~DRNNSGRRTFARNNIFDDILPEMLLQRPFCIN~~  
 201 YKVLPTGDDAYRTRSLLEIENV~~DHSIDLHSIVKNFVK~~SNTLESAYLIEGGKSDSDKDVETKNLSILISFLTKGDCLNFYNNILQRLSEFKTFLKSEALNLK  
 301 FVCLNYDPKCLPTFIESEALTE~~NAEEADITNGSTMISASLHHN~~IANKDATRSIIEFKSPVEKSDLFKKKLOFLDRSKNKRYILESIDLVNTDVPSNQFP  
 401 ENYAVLTFNLISMAIEVLDYLKKYSKNLGISKCFYVSLAPLVSSARSSVANIYEGKTSTHRLSVPSVTAGNNNDSNNNGNNKSNMSGITTLNNNSSIG  
 501 VSVYGHSNMSLTSLS~~SSVSLNEEIDMLATKLOGVELDGTYLEIN~~YRDYQTPTIEEHSTHLSNVKISKTTENSROFSQDIPSPLPLNEHMFMNDSNQSNGA  
 601 IIPQQLIATPSPVPNLQMNQRVLPNPITQSLEQNFVSAKVASSMGSDIGNRTIYIGNINPRSKAEDICNVVRGGILQSIKYIPEKKICFVTFIEAPSA  
 701 VQFYANSFIDPIVLHGNMLRVGWGHYSGPLPKLISLAVTIGASRVYVSLPEFAFKEKFIHDPQYKKLHETLSLPDAEQLREDFSTYGDIEQINYLSDSH  
 801 CCWINFMNISSAISLVEEMNKESTVQNESGEVTLKRATEEKFGGRYKGLLINYGKDRCGNINKNLIAGKNSRFYKVKRPSYNIRLSKLEEKRRQNEIDE  
 901 KEKAFDKPLNLESLGISLDAHKDNGGGETGTANNTGHENESELEAENENGNETGSFGGLGLAVASSDVKRATSDETDYEDIFNKSSGSSDSSSDVEVIMH  
 1001 SPSPDEYALKSOTLRSSSOTVINSKRPVKIEDEEEAVGMSQLNYRSSLRQAPPRAPSTLSYNHSKNNETPMQDIFTNGETANNRKKKRGSFARHRTIPGS  
 1101 DVMAOYLAQVQHSTFMYAANILGASAEDNTHPDE

# PAT1

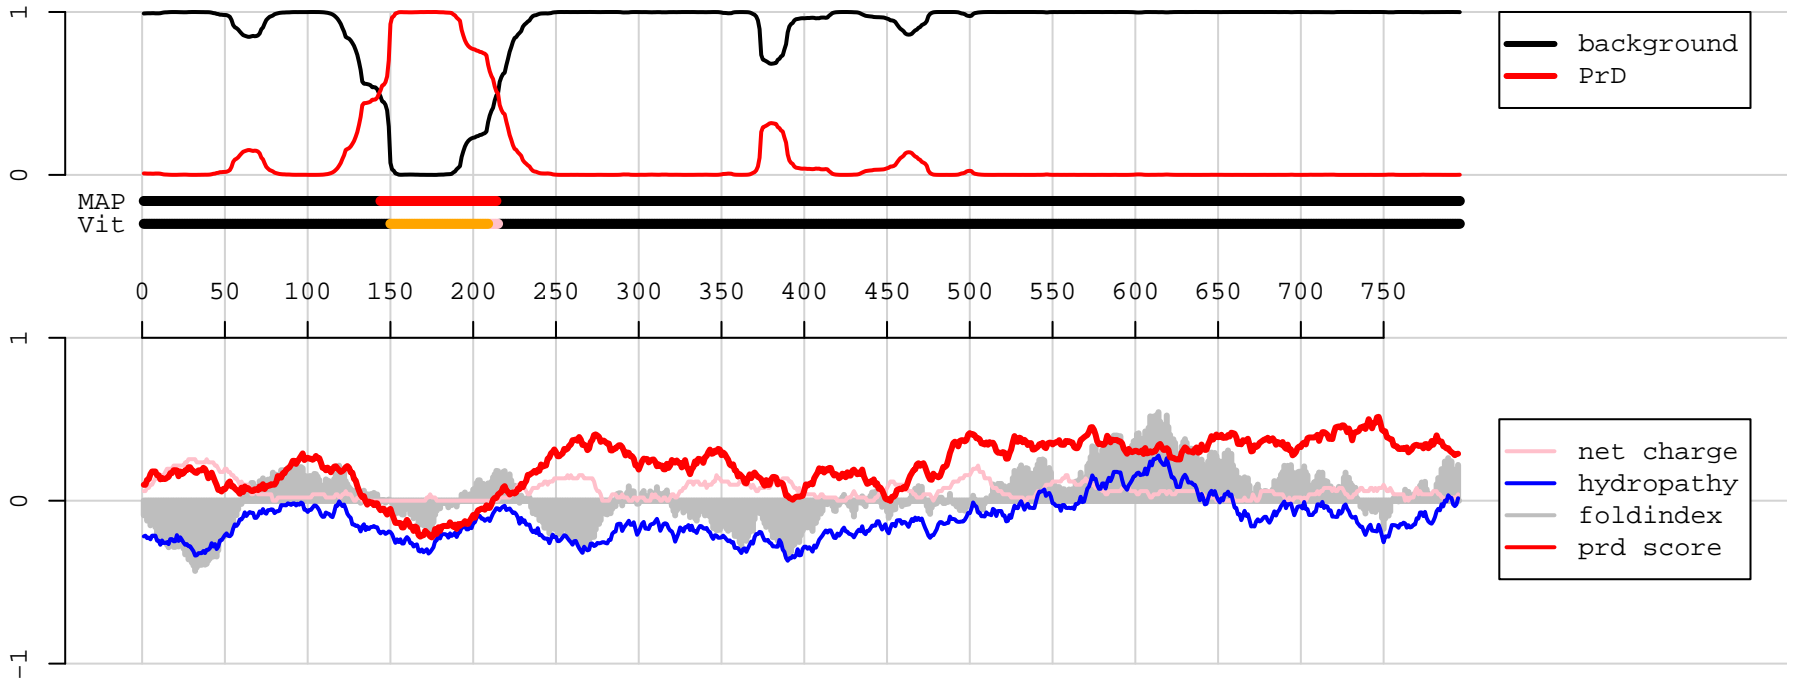

```

1  MSFFGLENSGNARDGPLDFEESYKGYGEHELEENDYLNDETFGDNVQVGTDFDFGNPHSSGSSGNAIGGNGVGATARSYVAATAEGISGPRTDGTAAAGP
101  LDLKPMESLWSTAPPPAMAPSPQSTMAPAPAPQQMAPLOPILSMODLEROOROMOOQFMNFHAMGHPOGLPOGPPPOQFPMOPASGOPGPSQFAPPPPP
201  GVNVNMQMPMGPVQVPVQASPSPIGMSNTPSPGPVVGATKMPLQSGRRSKRDLSPEEQRRLOIRHAKVEKILKYSGLMTPRDKDFITRYQLSQIVTDEP
301  YNEDFYFQVYKIIQRGGITSESNKGLIARAYLEHSGHRLGGRYKRTDIALORMQSOVEKAVTVAKERPSKLDQOAAAGNSSQDNKQANTVLGKISSTLN
401  SKNPRRQLOIPROQSPDPALKDVTDSLNTNVDLASSGSSSTGSSAAAVASKQRRRSSYAFNNGNGATNLNKSGGKFFILELIETVYEEILDLEANLRNGQ
501  QTDSTAMWEALHIDDSSYDVNPFISMLSFDKGIKIMPRIFNFLDKQQLKILQKIFNELSHLQIIILSSYKTPKPTLTQLKKVDFLQMIILKIIVSFLS
601  NNSNFIEIMGLLLQLIRNNNVSFLLTTSKIGLNLITILISRAALIKQDSSRSNILSSPEISTWNEIYDKLFTSLESKIQLIFPPREYNVHIMRLQNDKFMD
701  EAYIWQFLASLALSGKLNHQRIIDEVRDEIFATINEAETLQKKEKELSVLPQRSQELDTELKSI IYNKEKLYQDLNLFNLVMGLVYRDGEISELK
  
```

# CDC39

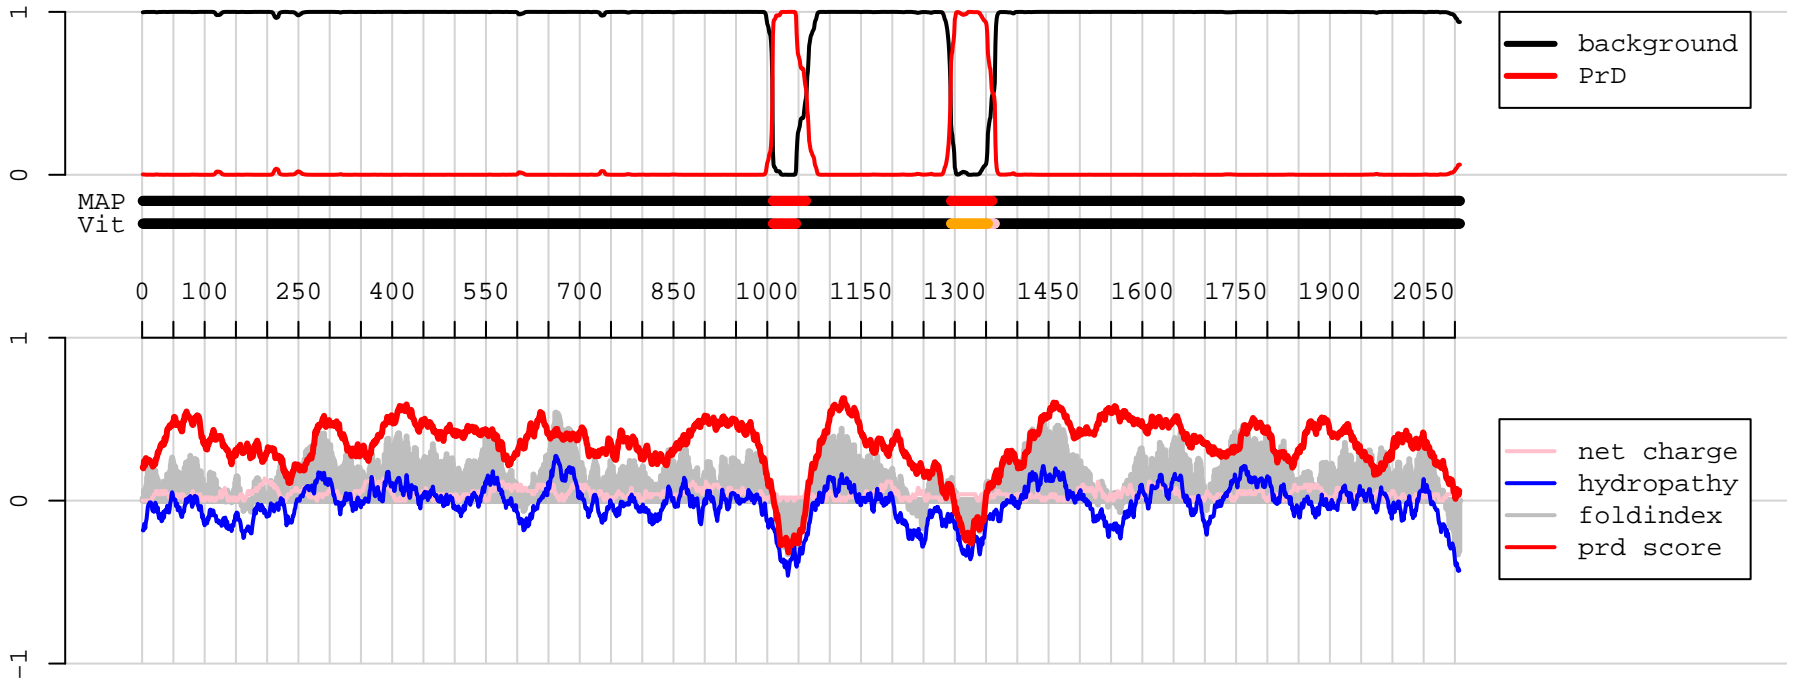

```

1  MLSATYRDLNTASNLETSKEKQAAQIVIAQISLLFTTLNNDNFESVEREIRHILDRSSVDIYIKVWERLLTLSSRDILQAGKFLQLQENLLHRLLEFAKD
101 LPKKSTDLELLKERTFNNEFQKQTGITLSLFDLFDKSANKDIIESLDRSSQINDFKTIKMNHTNYLRNFFLOTTTPETLESNLRDLLHSLEGESLNDL
201 LALLLSEILSPGSQNLQNDPTRSWLTPPMVLDATNRGNVIARSISLQANQINWNRVFNLMSTKYFLSAPLMPTTASLSCLFAALHDGPVIDEFFSCDWK
301 VIFKLDLAIQLHKWSVQNGCFDLLNAEGTRKVSETIPNTKQSLLYLLSIAASLNLELFLQREELSDGPMLAYFQECFFEDFNYPEYLILALVKEMKRFVL
401 LIENRTVIDEILITLLIQVHNKSPSSFKDVISTITDDSKIVDAAKIIINSDDAPIANFLKSLLDTGRLDTVINLKPNEAFKILPCARQIGWEGFDTFLK
501 TKVSPSNVDVVLESLEVQTKMTDTNTPFRSLKTFDLFAFHSLIEVLNKCPLDVLQLQRFESLEFSLLIAPRLINFGFGHDEAILANGDIAGINNDIEKE
601 MQNYLQKMYSGELAIKDVIELLRRLRDSDLPRDQEVFTCI THAVIAESTFFQDYPLDALATTSVLFSGMILFQLLRGFVLDVAFRIIMRFAKEPPESKMF
701 KFAVQAIYAFRIRLAEYPQYCKDLLRDVPALKSQAQVYQSIVEAATLANAPKERSRPVQEMIPLKFFAVDEVSCQINQEGAPKDVVEKVLVFLNNVTLAN
801 LNNKVDELKKSLLTPNYFSWFSTYLVTQRAKTEPNYHDLYSKVIIVAMGSLHQQFMVNVTLRQLFVLLSTKDEQAIDKKHLKNLASWLGKITLALNKP IKH
901 KNIAFREMLIEAYKENRLEIVVPFVTKILQRASESKI FKP NPWTVGILKLLIELNEKANWKLSTFEVEVLLKSFNLTTKSLKPSNFINTPEVIETLSG
1001 ALGSITLEQOOTEQORQIILMOHQOQMLIYOORQOQOQOQOHHI SANTIADQOAAFQGGESISHDNPFNNLLGSTIFVTHPDLKRVFQMALAKSV
1101 REILLEVVEKSSGIAVVTTKIILKDFATEVDESKLKTAAIMVRHLAQSLARATSIEPLKEGIRSTMQSLAPNMLSSSSPAEELDTAINENIGIALVL
1201 IEKASMDKSTQDLADQLMQAIAIRRYHKERRADQPFITONTNYPYSLSLPEPLGLKNTGVTPQQFRVYEEFGKNIPNLDVIPFAGLPAHAPPMTQNVGLTQ
1301 PQQOQAOMPTOILTSEQIRAOOQOQOQLOKSRLNOPSOSAOPPGVNVPNPQGGIAAVQSDLEQNQRVLVHLMMDILVSQIKENATKNNLAE LGDQNQIKTII

```

# NUP145

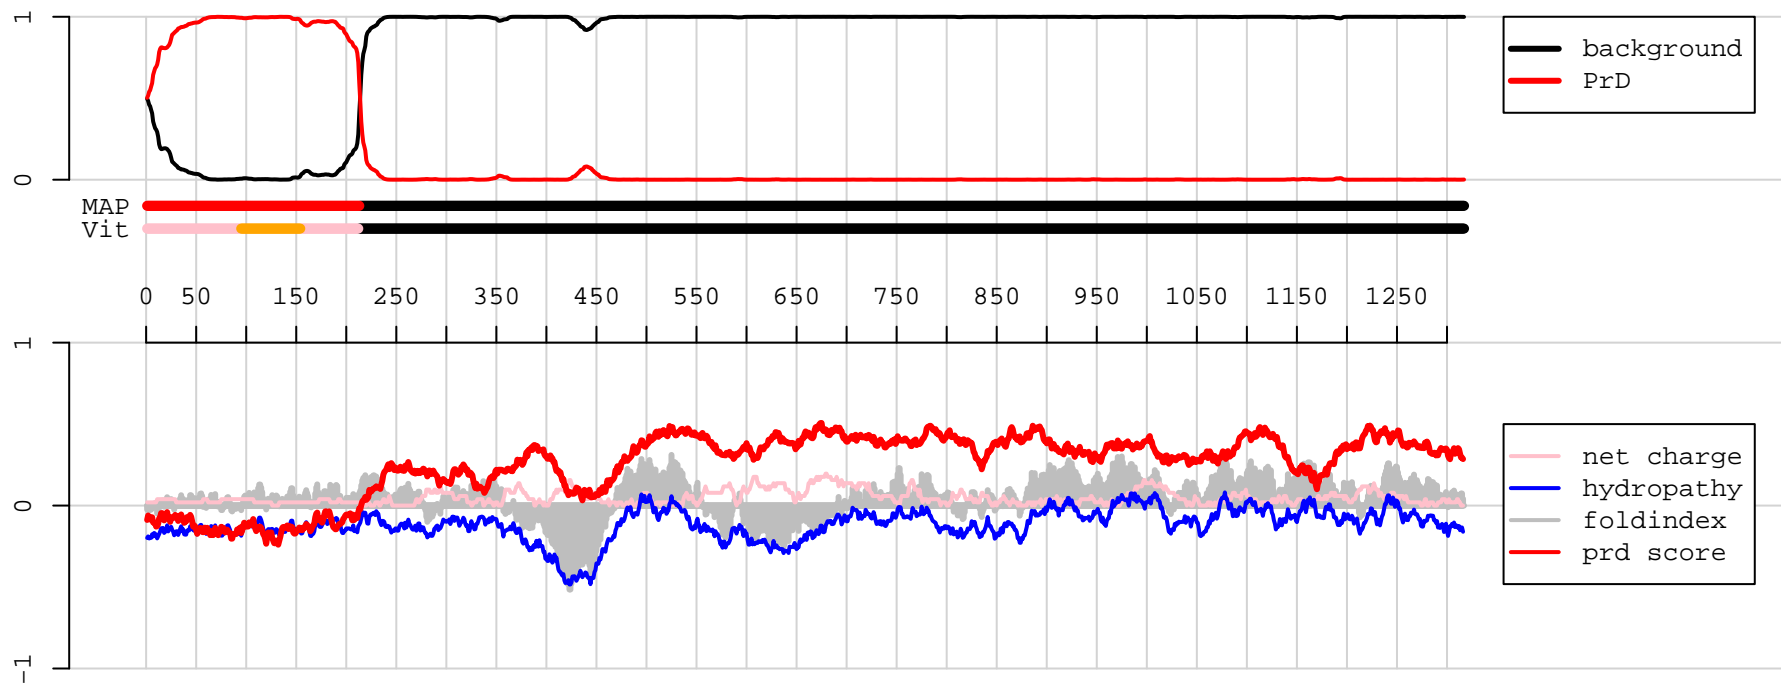

1 MFNKS VN S G F T F G N O N T S T P T S T P A O P S S S L O F P O K S T G L F G N V N V N A N T S T P S P S G G L F N A N S N A N S I S O O P A N N S L F G N K P A O P S G G L F G A T N N T T S K  
 101 S A G S L F G N N N A T A N S T G S T G L F S G S N N I A S S T O N G G L F G N S N N N N I T S T T O N G G L F G K P T T T P A G A G G L F G N S S T N S T T G L F G S N N T O S S T G I F G O K P G  
 201 A S T T G G L F G N N C A S F P R S G E T T G T M S T N P Y G I N I S N V P M A V A D M P R S I T S S L S D V N G K S D A E P K P I E N R R T Y S F S S S V S G N A P L P L A S Q S S L V S R L S T R L  
 301 K A T Q K S T S P N E I F S P S Y S K P W L N G A G S A P L V D D F F S S K M T S L A P N E N S I F P Q N G F N F L S S Q R A D L T E L R K L K I D S N R S A A K K L K L L S G T P A I T K K H M Q D E  
 401 Q D S S E N E P I A N A D S V T N I D R K E N R D N N L D N T Y L N G K E Q S N N L N K O D G E N T L O H E K S S S F G Y W C S P S P E Q L E R L S L K Q L A A V S N F V I G R R G Y G C I T F Q H D V  
 501 D L T A F T K S F R E E L F G K I V I F R S S K T V E V Y P D E A T K P M I G H L N V P A I I T L E N V Y P V D K K T K K P M K D T T K F A E F O V F D R K L R S M R E M N Y I S Y N P F G G T W T F  
 601 K V N H F S I W G L V N E E D A E I D E D D L S K Q E D G G E Q P L R K V R T L A O S K P S D K E V I L K T D G T F G T L S G K D D S I V E E K A Y E P D L S D A D F E G I E A S P K L D V S K D W V E  
 701 Q L I L A G S S L R S V F A T S K E F D G P C Q N E I D L L F S E C N D E I D N A K L I M K E R R F T A S Y T F A K F S T G S M L L T K D I V G K S G V S I K R L P T E L Q R K F L F D D V Y L D K E I  
 801 E K V T I E A R K S N P Y P Q I S E S S L L F K D A L D Y M E K T S S D Y N L W K L S S I L F D P V S Y P Y K T D N D Q V K M A L L K K E R H C R L T S W I V S Q I G P E I E E K I R N S S N E I E Q I  
 901 F L Y L L L N D V V R A S K L A I E S K N G H L S V L I S Y L G S N D P R I R D L A E L Q L Q K W S T G G C S I D K N I S K I Y K L L S G S P F E G L F S L K E L E S E F S W L C L L N L T L C Y G Q I  
 1001 D E Y S L E S L V Q S H L D K F S L P Y D D P I G V I F Q L Y A A N E N T E K L Y K E V R Q R T N A L D V Q F C W Y L I Q T L R F N G T R V F S K E T S D E A T F A F A A Q L E F A Q L H G H S L F V S  
 1101 C F L N D D K A A E D T I K R L V M R E I T L L R A S T N D H I L N R L K I P S Q L I F N A Q A L K D R Y E G N Y L S E V Q N L L L G S S Y D L A E M A I V T S L G P R L L L S N N P V Q N N E L K T L  
 1201 R E I L N E F P D S E R D K W S V S I N V F E V Y L K L V L D N V E T Q E T I D S L I S G M K I F Y D Q Y K H C R E V A A C C N V M S Q E I V S K I L E K N N P S I G D S K A K L L E L P L G Q P E K A  
 1301 Y L R G E F A Q D L M K C T Y K I

# SRP54

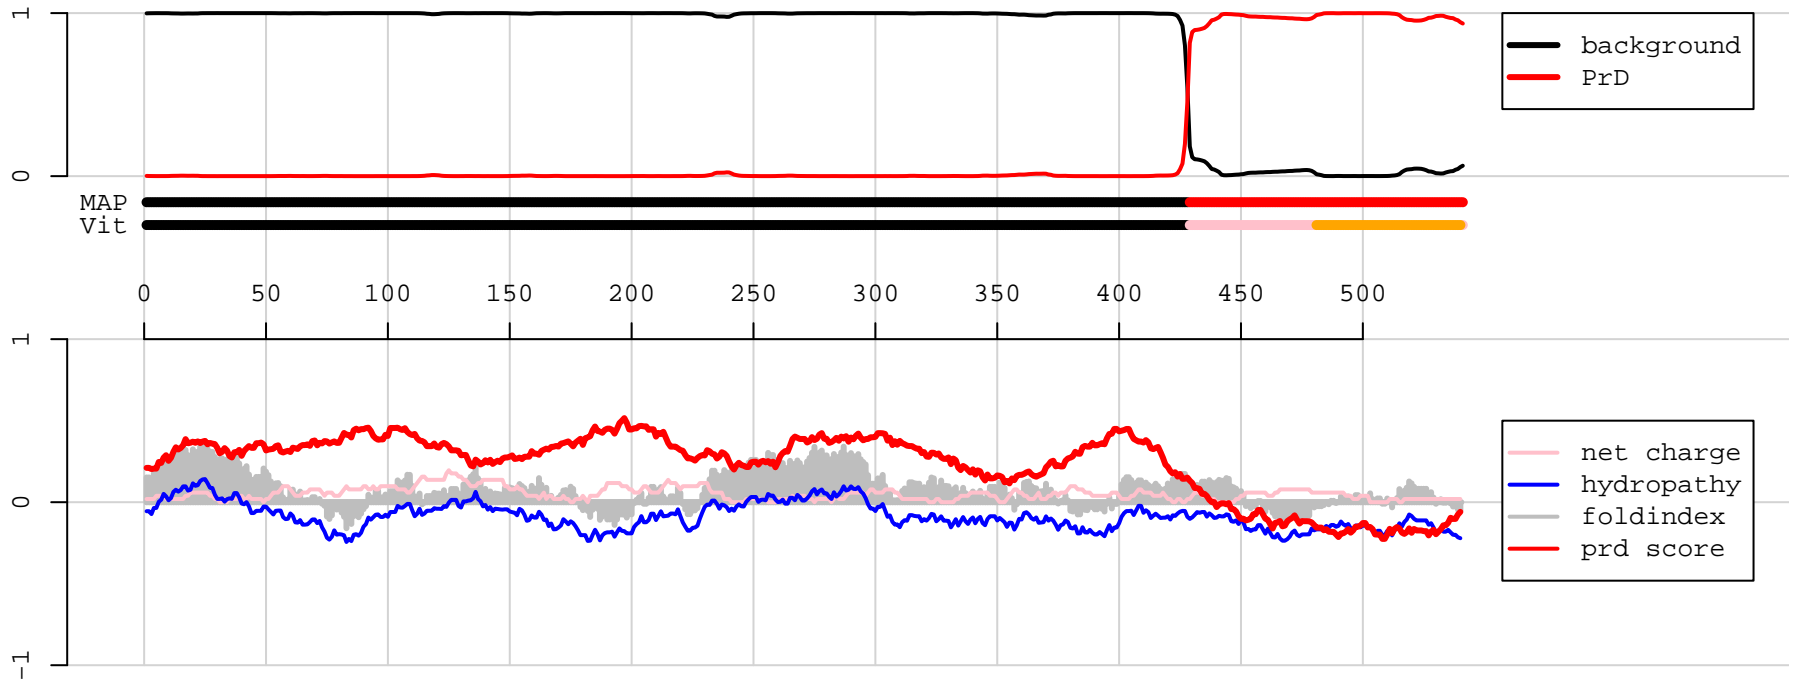

1 MVLADLGKRINSAVNNAISNTQDDFTTSVDVMLKGI V TALLESDVNIALVSKLRNNIRSQLLSENRSKSTTNAQTKKLIQKTVFDELCKLVTCEGSEEK  
 101 AFVPPKRRKTNIIMFVGLQGSGKTTSTCKLAVYYSKRGFKVGLVCADTFRAGAFDQLKQNAIRARIPFYGSYTETDPAKVAEEGINKFKKEKFDIIIVDTS  
 201 GRHHQEEELFQEMIEISNVIKPNQTIMVLDASIGQAAEQSKAFKESDFGAIILTKMDGHARGGGAISAVAATNPPIIFIGTGEHIHDLEKFSPKSFIS  
 301 KLLGIGDIESLFEQLQTVSNKEDAKATMENIQKGF TLLDFKKQMQTIMKMGPLSNIAQMIPGMSNMMNQVGEEETSQKMKKMVYVLD SMTKEELEDGR  
 401 MFIEEPTRMVRVAKGSGTSVFEVEMILM QQQMMARMAQTATQQQPGAPGANARMPGMPNMPGMPNMPGMPNMPGMPKVT POMMQQAQOKL KONPGLMONM  
 501 MNMFGGGMGGGMGGGMPDMNEMMKMMODPOMQOMAKOFGMG



# SNF6

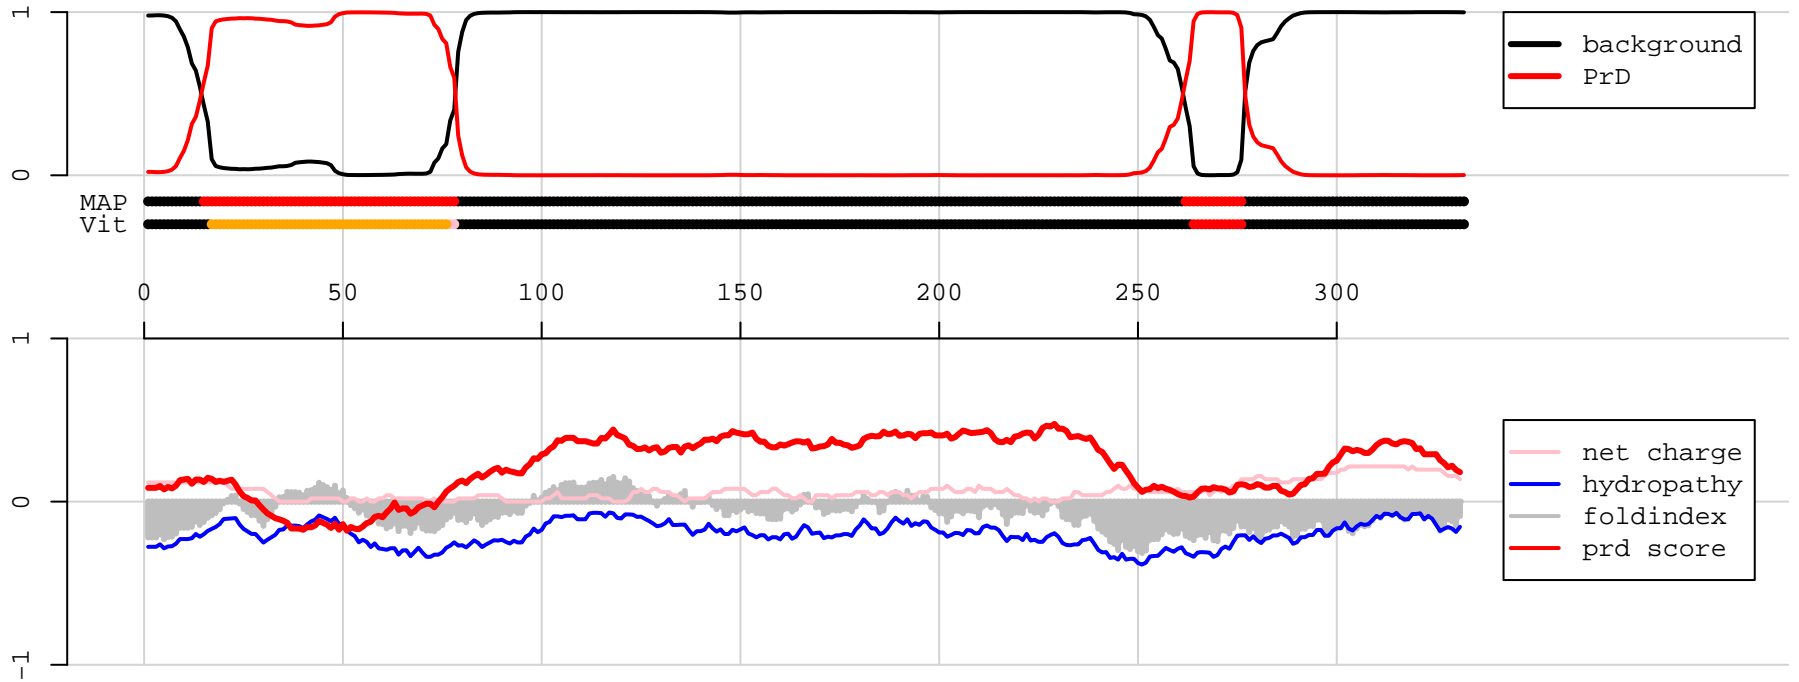

```

1  MGVIKKRSHHGKASRQQYYSGVQVGGVGSMAINNIPSLTSAEENNYOYGYSGSSAGMNGRSLTYAQQOLNKORQDFERVRLRPEQLSNI IHDESDT
101 ISFRSNLLKNFISNDAFNMLSLTTVPCDRIEKSRLFSEKTIRYLMQKQHEMKTQAAELQEKPLTPLKYTKLIAAAEDGSRSTKDMIDAVFEQDShLRYQ
201 PDGVVVRDDPALVGKLRGDLREAPADYWTHAYRDVLAQYHEAKERIROKEVTAGEAQDEASLQQQQQDLQQQQQVTTTVASQSPHATATEKEPVPVV
301 DDPLENMFGDYSNEPFNTNFDFDEFGLDAVFF
  
```

# YPL247C

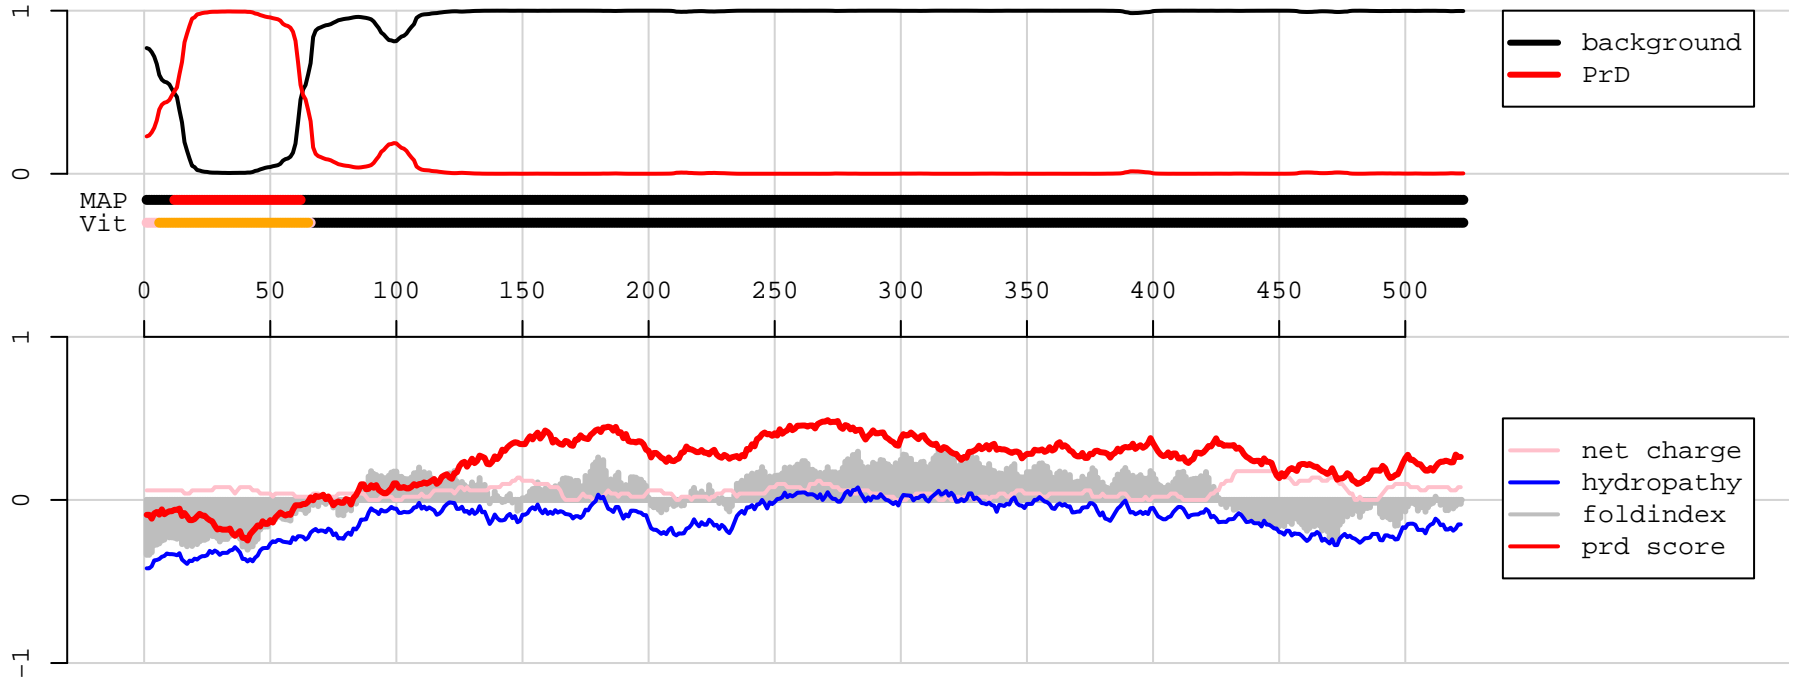

1 MDPFHNGNKRSSISFGSSOROPYNKNNYLSGTNGPSSAAODGRGSPFGMSGNTTNGGNSKRNSGCDLSATYYASRSPMYSPLDFSPPVFSPNHSQLQQ  
 101 ARGYAANI PVVSNLMNPSMASVCEYQSHYPLFGLDWSADDYVCLGSYKEDSRNKLQVLHSNDLLSWESVVDADVVPVSKI QWVPSQLYPRKLTATCSDSL  
 201 RIWSVSPEERQFOEQINLSLCKYNRQHPANPAADDMKVI GTFPPI T SFDWNTVDTNLI I SSSIDTTCIVWDLQSSHVKTQLIAHDSEVFDVRF LTKST  
 301 QLFASCGGDG SVRVFDLRSLAHSTIIYEPPSSVSGATAGTITPSSKGS DALLRLEPSYDPNVLATFAADSNKIIILD MRNPESPILNLQHGSSVNGI  
 401 KWHPTKRNVLLSCGDQC VLYWDLNSSFMEINAAGSKSPSIHGTSLED PDGDTEMTDGGAGSGLNEDPLSLN NNSKQVCKTLET PNM MYANKTQEINNIA  
 501 WRPQRGDWFGCVSGKKFQNRVVL

# YDL233W

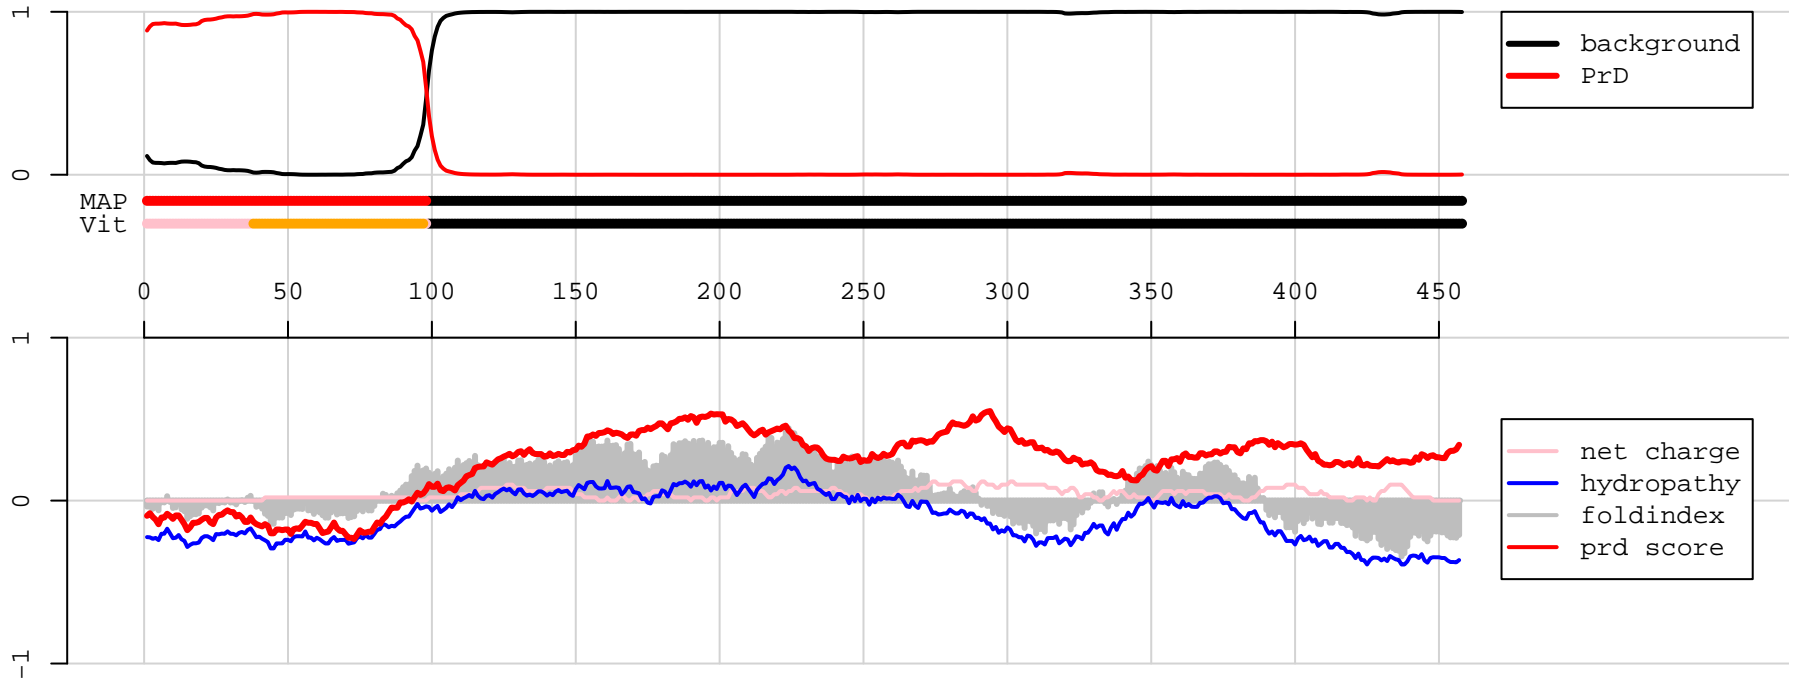

1 MYOGPPOPPPPOAVPMPYIVNNNTPPYPNGNINFPPTAQONIPPTVYPOOVFPFGOPGGOFPOPSSEOOVFNOLPOVTOTFHNSAONTNATGGPGSGSMP  
 101 MFTPVASFPHMATAATAAAPLPRSASQASLSMLRVPYHVRKYLNSLAMLKLYEINEVNTAMGKIGLLSFWTELISDIFTPDAVIRYSKKSMTDYREFE  
 201 FIIPVFPVICSTLGRFGIVRMEVKVLQLKTQVLSNSTIFFNCPRVTFVYYYPDGSYITHFSQMKGAFDLKINWLDVSMHSFVPDIEWNAVERLLSDDT  
 301 KSTEIEQIFRKLKQEDVKEQGN SFAENNATNVPNFEAITQLRSYFDVFRNVSVFGTQEGLMRVMQISTVMSTLKNLRKFQIEKNIDSPVTALSAYIDAD  
 401 KKDSGSEPLHAKRRRNSGISPRTTTLGPNGNSNTSNEELPTSDVNDINKDMTKKKMKF

## RPM2

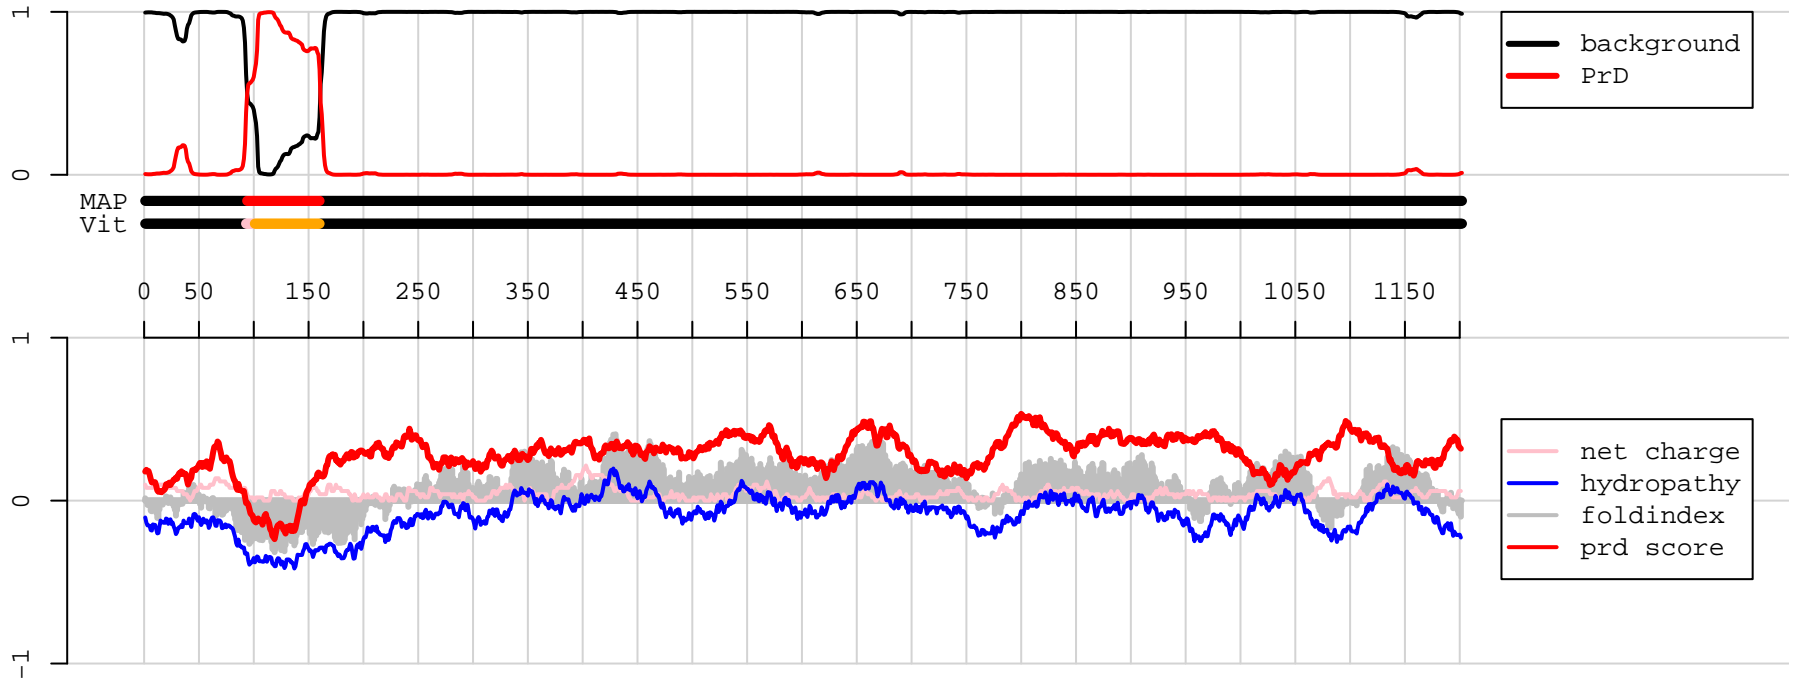

1 MAFKSFYISKGYHRSAAQKKTATSFDDSSYOYLRQNGQLVNSDPVLHSHLPHPVVAVNVYNNVDDILHPHDLSDSSINNTNNPLTHEELL~~YNONVSLR~~  
 101 ~~SLKQQOSTNYVNNNNNNNOHRYYSTGPTLPTNOYDPLNFSNRNFODLSLKTSQPSVQOPONE~~YSSLKDENAPVWKEDTEPCLNKSTYLOTHIDEINRCYEQ  
 201 KNYNKINSLYQSLKRNDIVPPLEIFTKVLDSLCKRPLDNNDLDNKMYELLTCYQDMINNRLKPPDEIYNIVLLSLFKGSILAYQFENPNGSDFYKIAIEL  
 301 FNTTNDPKQKSVVKFRNFSKDVLDYNLLAMNIYPGHITLSKAQQVIKSSPAFIKDSFYFIACFSYAKLTNDKFAIKELYEDFRLSLSSGSPDQGLFDDQ  
 401 FEIYSVILSSFIETGEVELATNLLDDLVSQIQQSSNGLASNISLLSSFLISMSKVDPSKAYEIWFKFHNLNWIPEFSYEFYLVFMANSFQDWNLTKKIYD  
 501 YIFPMERNLSPLKKQKLSDYLLHPIGVDSITTSLLDYSLQKLDNEVIMKILEESIVKNFSFDIGIYPFVFNYLREIQCGEDYLMRFIESHAEFIKKSNSI  
 601 NKFQFLNMIVDNFQSQSLLNKISHAKFFKNFVEDFNLENCVELVSYNGLISCIINNFIKIPKTIKDFPYILEIHAILVTKLDFDFTYPILQNGNNEVLLKFR  
 701 DQIEHQFKMLAQNFCRLNLDPNLLAGVVSQAMKMNLDLDTANGQDLLNFFNHPGDWDKSYPLSLGSEFIRNSPRGGIREFTKLSKEGYCFDYDPTYKELI IK  
 801 RAINKQIIDKCLEVCPDSIELKNIVNLMISKIPGRNLTQLIINNPKFSKVFPVNLNRNDSMLKLIENCELSNFIKIRICDFPEKFKSIAIQAENKNAIELIY  
 901 ERLFDGGKYADILRYNNIVPVLNLELLKSCIRSGEFKKYESLSKFFNDKISESSKIDIQLEYLINKNDLKGAFITLFEKTPRELRTPHKTMDLTYTFALFL  
 1001 DSFNRNITYYESPENTLQFANILSSQTSFINLLSTYNI IAHSDHLMNFVGGMAAKVKKEILNQMLNLYDSIRLLSPSIEENDKSMKEKLRKVKNYCRF  
 1101 ~~KAYLKSPELMDDELKTLVSVESFLNPFPTPSMLFNLIETIYINEHASSLVLQNGLIYSLQKGLNKLISYLEESFITSGNDANIEKVFREFRSLLRKSKPL~~  
 1201 QA

# SET1

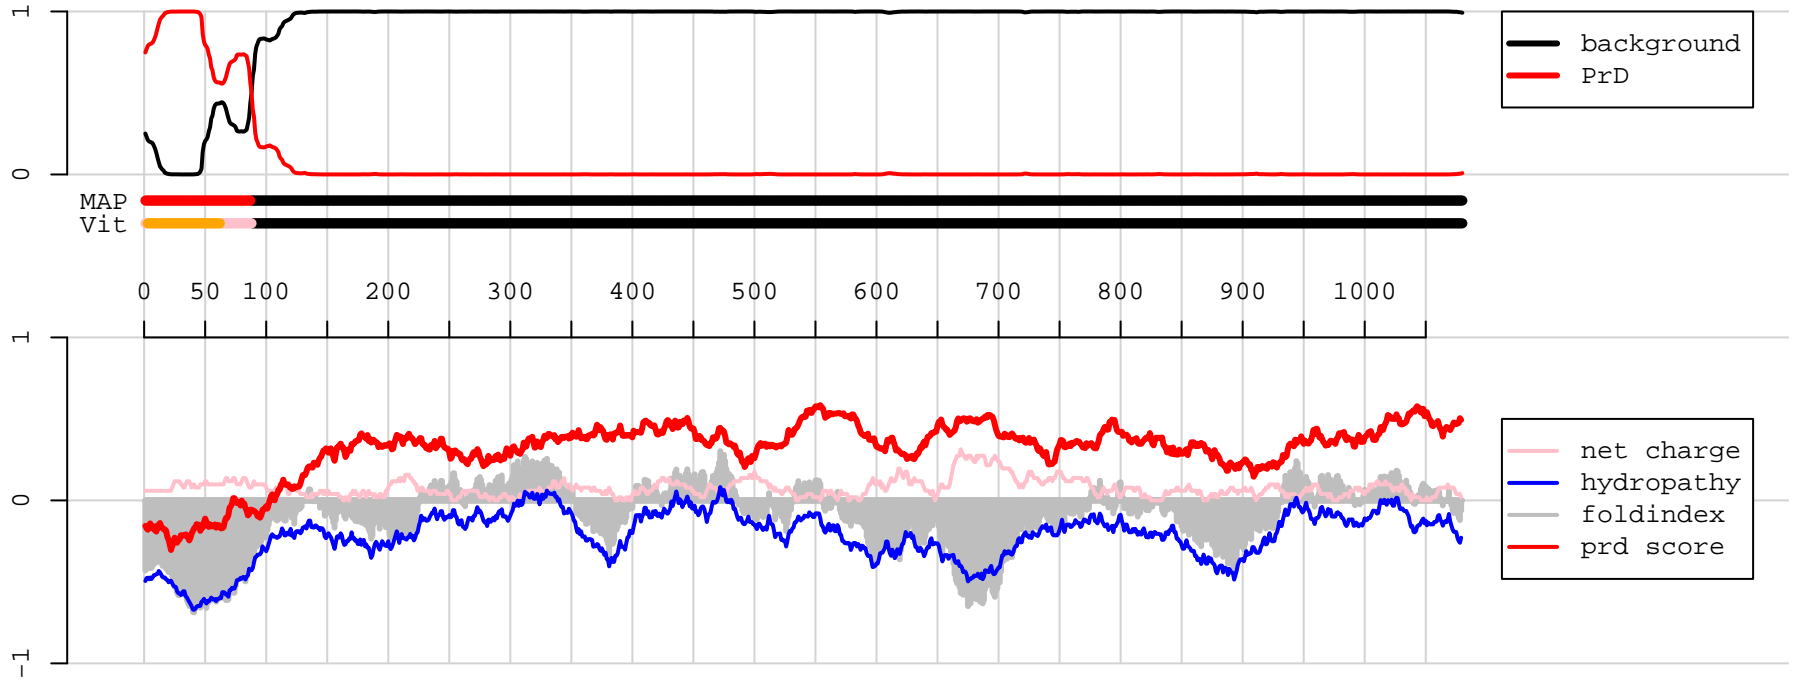

1 MSNYRRRAHASSGSYROPQEOPOYSRSGHYOYSNGHSHOOYSSOYNORRRYNHNDGTRRRYNDDRPHSSNNASTROYATNNSOSGPYVNKKS DISSRRG  
 101 MSQSRYSNSNVHNTLASSGSLPTESALLLQQRPPSVLRYNTDNLKSKFHYFDP IKGEFFNKDKMLS WKATDKEFSETGYVVKELQDGQFKFKIKHRHP  
 201 EIKASDPRNENGIMTSGKVATHRKC RNSLILLPRISYDRYSLGPPSPCEIVVYPAQDSTTTNIQDIS IKNYFKKYGEISHFEAFNDPNSALPHVYL IKY  
 301 ASSDGKINDAAKA AFSAVRKHESSGCFIMGFKFEVILNKHSILNII SKFVEINVKKLQKLOENLKKAKEKEAENEKAKELQGDITLPKEPKVDTLSHS  
 401 SGSEKRIPYDLLGVVNNRPVLHVSKI FVAKHRFCVEDFKYKLRGYRCAKFI DHPTGIYIIFNDIAHAQTC SNAESGNLTIMSRSRRIPI LIKFHLILPRF  
 501 QNRTRFNKSSSSSNSTNVP IKYESKEEFIEATAKQILKDLEKTLHVD IKKRLIGPTVFDALDHANFP ELLAKRELKEKEKROQIASKIAEDELKRKEEAK  
 601 RDFDLFGLYGGYAKSNKRNLKRHNSLALDHTSLKRKKLSNGIKPMAHLLNEETDSKETTPLNDEGITRVSKEHDEEDENMTSSSSEEEEEEPDKKFKSE  
 701 SEPTTPESDHLHG I KPLVPDQNGSSDVL DASSMYKPTATEIPEPVYPPEEYDLKYSQTLSSMDLQNAIKDEEDMLILKQLLSTYTP TPTVTPETSAALEYKI  
 801 WQSRKRVLEEEKASDWQIELNGTLFDSE LQPGSSFKAEGFRKIADKLIKINYLPHRRRVHQP LNTVNIHNERNEYTPELCQREESSNKEP SDSVPQEVSSS  
 901 RDNRASNRRFQODIEAQKAAIGTESELLSLNQLNKRKKPVMFARSAIHNWGLYALDSIAAKEMIIEYVGERIRQPVAEMREKRYLKNIGIGSSYLFVRVDEN  
 1001 TVIDATKKGGIARFINHCCDPNCTAKI IKVGGRRRIVIYALRDIAASEELTYDYKFEREKDDEERLPCLCGAPNCKGFLN

# NUP1

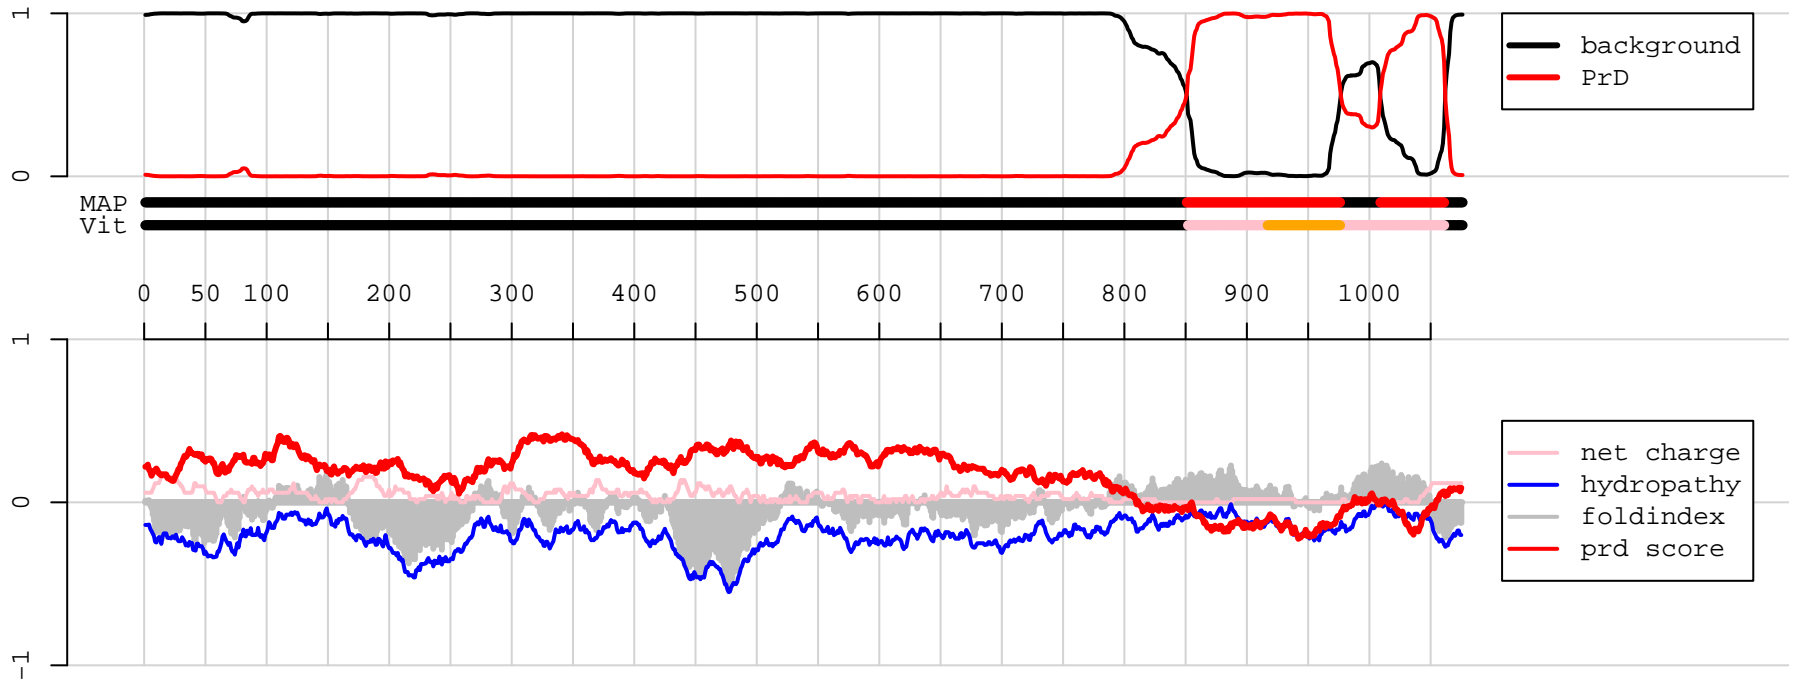

1 MSSNTSSVMSSPRVEKRSFSSTLKSFFTNPNKKRPSSKKVFSSNLSYANHLEESDVEDTLHVNKRKRVSQTSQHSDSLTQNNNNAPIIIYGTENTERPPL  
 101 LPILPIQRLRLREKQVRNMRGLIQSTEFPSITSSVILGSQKSDEGGSYLCTSSSTPSPKNGSCTRQLAGKSGEDTNVGLPILKSLKNRSNRKRFH  
 201 SQSKGTVWSANFEYDLSEYDAIQKKNKDKENAGGDQKTSENRNNIKSSISNGNLATGPNLTSEIEDLRADINSNRLSNPQKNLLKGPASTVAKTAPI  
 301 QESFVPNSERSGTPTLKKNIEPKKDKESIVLPTVGFDFIKDNETPSKKTSPKATSSAGAVFKSSVEMGKTDKSTKTAEAPTLNFSQKANKTKAVDNTV  
 401 PSTTLFNFGGKSDTIVTSASQPFKFGKTSEKSENHTESDAPPKSTAPIFSFGKQEENGDEGDENEPKRRRLPVSEDNTNKLPLDFGKTGDQKTKKGES  
 501 EKDASGKPSFVFGASDKQAEGPLFTFGKKADVTSNIDSSAQFTFGKAATAKETHTKPSSETPATIVKKPTFTFGQSTSENKISEGSAKPTFSFSKSEER  
 601 KSSPISNEAAKPSFSFPGKPVVDVQAPTDDKTLKPTFSFTEPAQKDSSVVSEPKKPSFTFASSKTSQPKPLFSFGKSDAAKEPPGSNTSFSFTKPPANETD  
 701 KRPTPPSFTFGGSTTNNTTTSTKPSFSFGAPESMKSTASTAAANTEKLSNGFSFTKFNHNKEKSNSPTSFFDGSASSTPIPVLGKPTDATGNTTSKSAF  
 801 SFGTANTNGTNASANSTSFNFNAPATGNNTTTTNTSGTNIAGTFNVGKPD OSTIASGNTNGAGSAFGFSSSGTAATGAASNOSFFNFGNNGAGGLNPFTS  
 901 ATSSTNANAGLFNKPPSTNAQNVNVPFAFNFTGNNSTPGGGSVFNMMNGTNTANTVVFAGSNNOPHOSQTPSFNTNSSTFTPSTVPNINFSGLNGGITNTATN  
 1001 ALRPDIFGANAASGSNSNVTNPPSSIFGGAGGVPTTSTFGOPASAPNOMGMGTNNGMSMGGGVMANRKIARMRHSKR

# SEC24

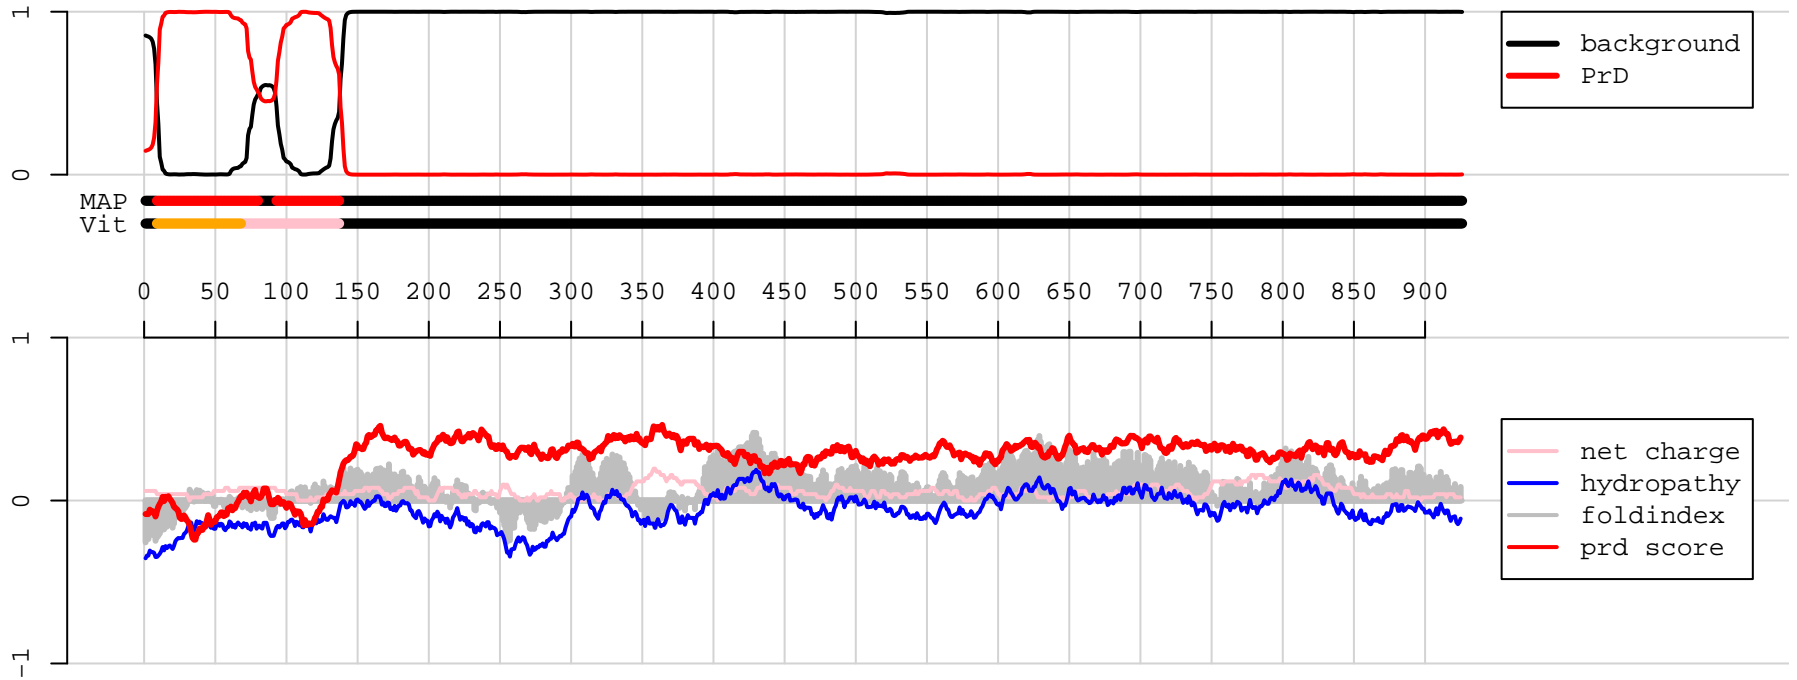

1 MSHHKRVYPOAOLYGNATPLOOPAOFMPPODPAAAGMSYGOMGMPPOGAVPSMG00OFLTPAOEQLHQOIQATTSMNDMHLHNVPLVDPNAYMOPO  
 101 VPVOMGTPL0000OPMAAPAYGOPSAAAMGQNMRRPMNQLYPIDLLTELPPPITDLTLPPPPLVIPPERMLVPSELNASPDYIRSTLNAVPKNSSLLKSK  
 201 LPFGLVIRPYQHLYDDIDPPPLNEDGLIVRCRRCRSYMNPVFTFIEQGRRWRCNFCRLANDVPMQMDQSDPNDPKSRYDRNEIKCAVMEYMAPKEYTLRQ  
 301 PPPATYCFIDVQSSSIKSGLLATTINTLLQNLDSIPNHDERTRISILCVDNAIHFKIPLDSENNEESADQINMMDIADLEEFLLPRPNSMVVSLKACR  
 401 QNIETLLTKIPQIFQSNLITNFALGPALKSAYHLIGGVGGKIIVVSGLTPNLGIGKLRNRESGVVNTSKETAQLLSCQDSFYKNFTIDCSKVQITVDLF  
 501 LASEDYMDVASLSNLSRFTAGQTHFYPGFSGKNPNDIVKFSTEFAKHISMDFCMETVMRARGSTGLRMSRFYGHFFNRSSDLCAFSTMPRDQSYLFEVNV  
 601 DESIMADYCYVQVAVLLSLNNSQRRIRIITLAMPTTESLAEVYASADQLAIASFYNSKAVEKALNSSLDDARVLINKSVQDILATYKKEIVVSNTAGGAP  
 701 LRLCANLRMFPLLMHSLTKHMAFRSGIVPSDHRASALNNLESPLKYLKNIYPDVYSLHDMADEAGLPVQTEDGEATGTIVLPQPINATSSLFERYGLY  
 801 LIDNGNELFLWMGGDAVPALVFDVFGTQDIFDIPIGKQEIPIVVENSEFNRQVRVNIINQLRNHDDVITYQSLYIVRGASLSEPVNHASAREVATLRLWASS  
 901 TLVEDKILNNEASYREFLQIMKARISK

# WHI3

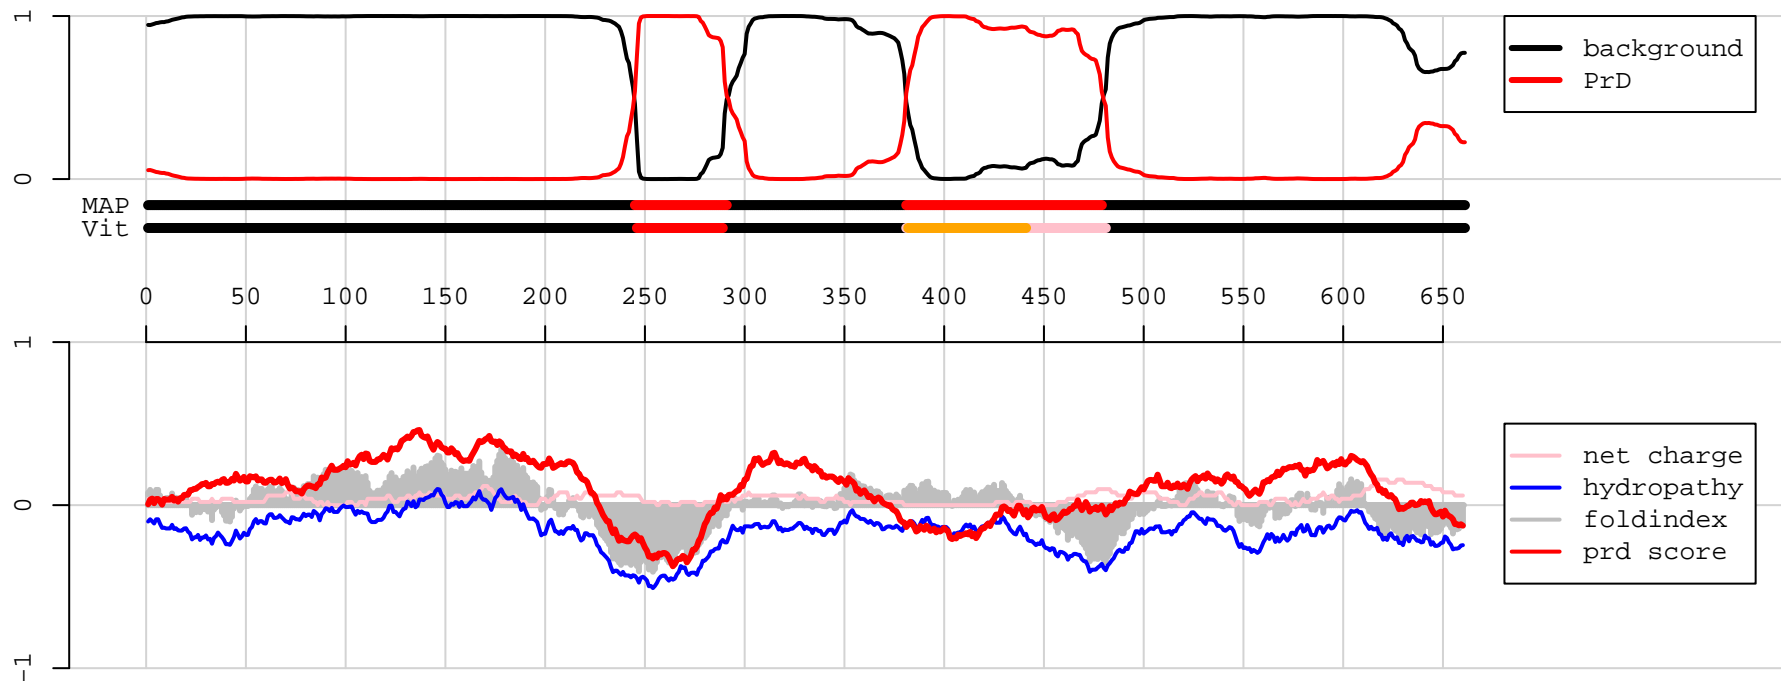

1 MQSSVYFDQTGSFASSSDNVVSSTTNTNHNI SPSHRSSLNLNTTSHPEASGRGSASGELYLNDTNSPLAISSMLNTLALGSM PQDIASSNI SNHDNNIKG  
 101 SYSLKLSNVAKDITLRECYAIFALAEGVKSIELQKNSSSSITSASLEDENDIFI IARFELLNLAINYAVILNSKNELFGPSFPNKTTVEI IDDTTKNLV  
 201 SFPSSAIFNDTSRLNKSNSGMKRPSLLSORSRFSFSDPFSNDSPLSQQQSQQQQQQPQQPOQHSTQKHSPQOCNQOQVNSSIPLSSOGVIGLHSNHS HQ  
 301 DLSVESTIQTSDIGKSFLLRDNTEINEKIWGTSGIPSSINGYMSTPQPSTPTLEWGNTSASQHGSSFFLPSAASTAIAPTNSNTSANANASSNNGASNNG  
 401 ANQALSASSOQPMMOIGNTINTSLTSSNSLPPYGLMSSSQSHLSNMVNTSDMNITPOKONRFMOOPOPEHMYPVNOSNTPOKVPPARLSSSRNSHKNNST  
 501 TSLSSNITGSASISQADLSLLARIPPPANPADQNPPCNTLYVGNLPSDATEQELRQLFSGQEGFRRLSFRNKNTTSNGHSHGPMCFVEFDDVVSFATRALA  
 601 ELYGRQLPRSTVSSKGGIRLSFSKNPLGVRGPNRRGGSGNPNPNVNMLSSYNSNVGHIKN



# NOP1

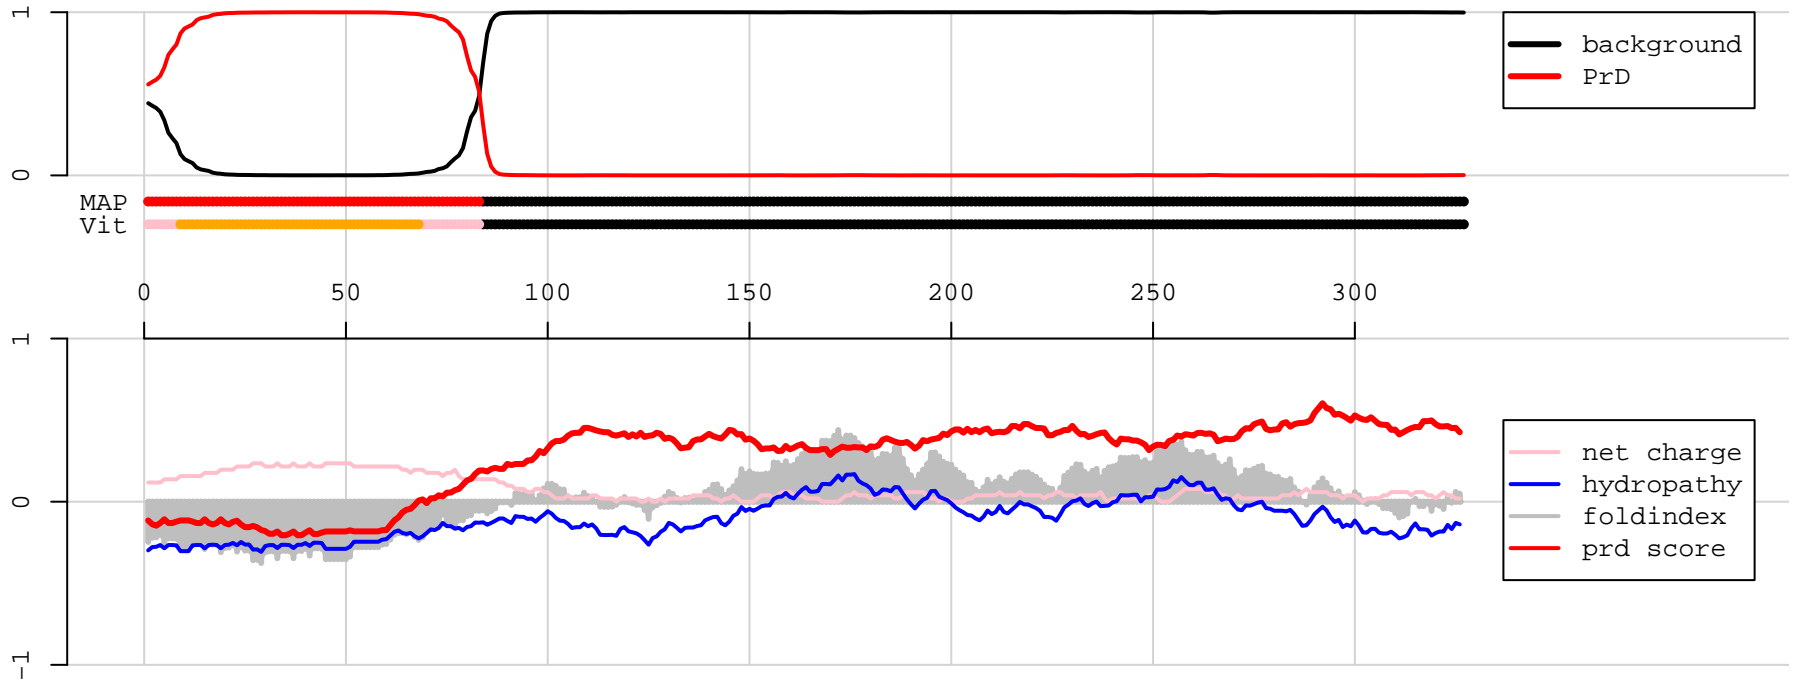

1 MSFRPGSRGGSRGGSRGGFGRGGSRGGARGGSRGGFGRGGSRGGARGGSRGGFGRGGSRGGARGGSRGGRGAAGGARGGAKVVI<sup>1</sup>EPHRHAGVYIAR  
 101 GKEDLLVTKNMAPGESVYGEKRISVEEPSKEDGVPPTKVEYRVWNPFRSKLAAGIMGGLDELFIAPGKKVLYLGAASGTSVSHVSDVVGPEGVVYAVEFS  
 201 HRPGRELISMAKKRPNIPII<sup>2</sup>EDARHPQKYRMLIGMVDCVFADVAQPDQARIIALNSHMFLKDQGGVVISIKANCIDSTVDAETVFAREVQKLREERIKP  
 301 LEQLTLEPYERDHCIVVGRYMRSGLKK

# YIF1

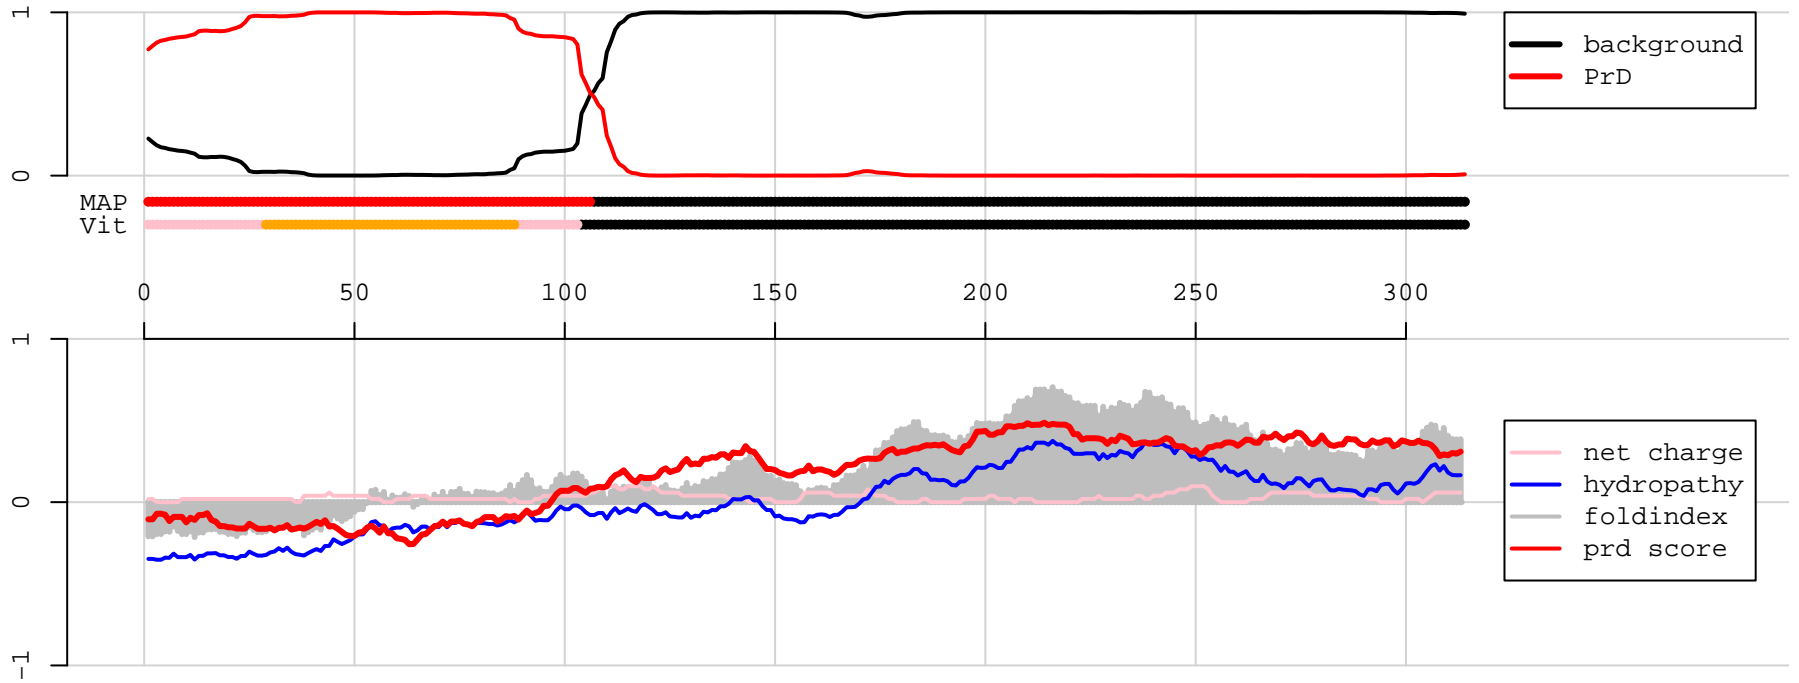

1 MSYNPYAYATSEONGVNDRFSHTPOORPMQIPRNTPVNGOGNANMNANVNGSGGGFPFODPRGSMAFOLGOSAFSNFIGODNFNOFOETVNKATANAAG  
 101 SQQISTYFQVSTRYVINKLKLILVPFLNGTKNWQRIMDSGNFLPPRDDVNSPDMYMPIMGLVTYILIWNTQQGLKGSFNPEDLYYKLSSTLAFVCLDLLI  
 201 LKLGlyLLIDSKIPSFSLVELLCYVGYKFVPLILAQLLTNVTMPFNLNILIKFYLFIAFGVFLLRsvkFNLLSRGAEDDDIHVSISKSTVKKCNyFLFV  
 301 YGFIWQNVLmwLmg

# PIN2

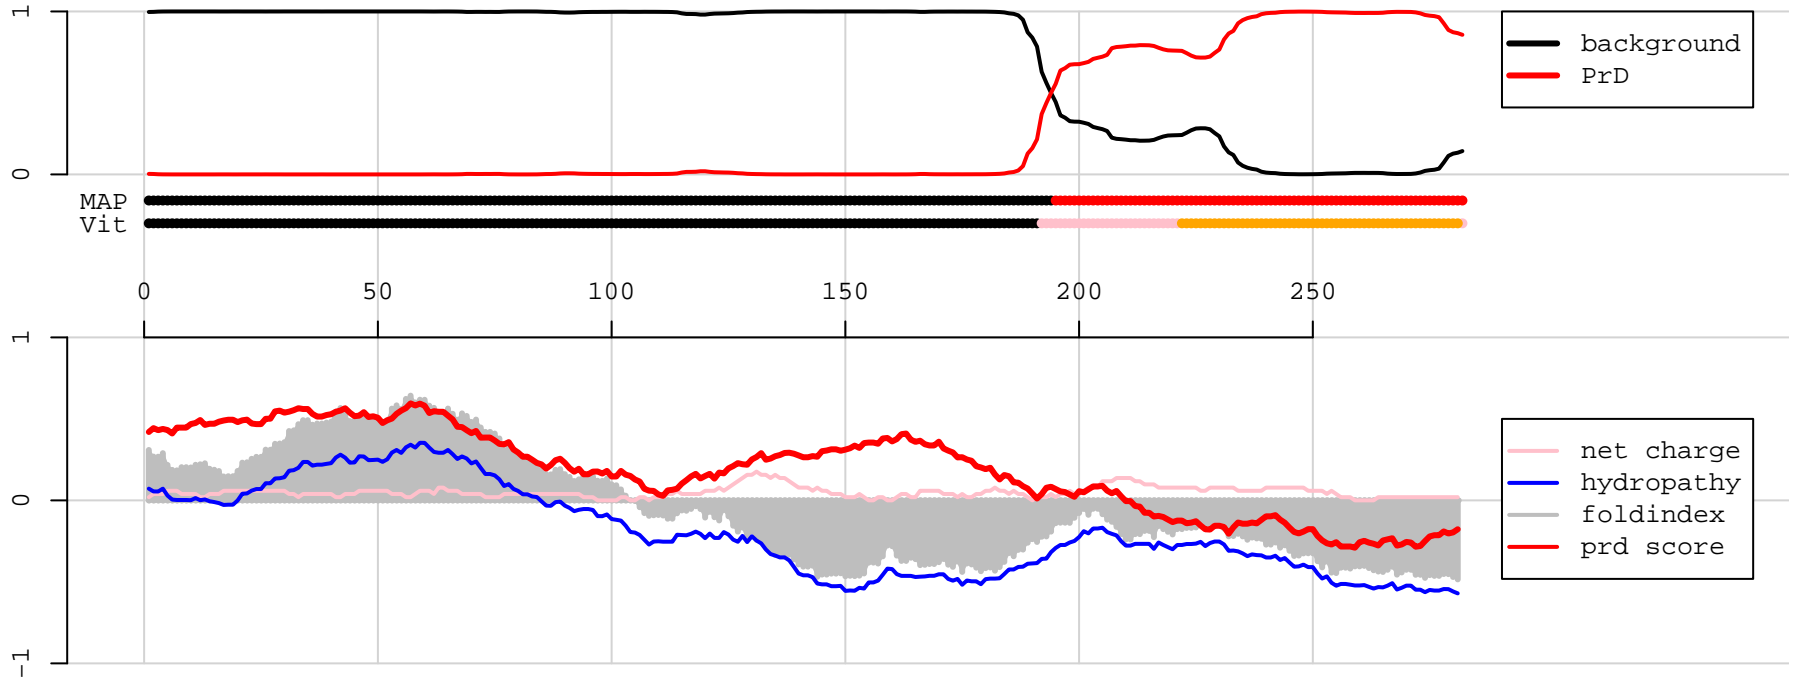

1 MNVCKLKEIVPLFPRSSFTDGVVSTGKSFRRSWDTCMDNKACKIIAIVGIVLACILVIWLIGLLTCFRQGVGTGIGQFICWCCRCNSDRNGNNTMPVNEGF  
 101 SRVNMGVAPPSTVIYQPIQOPESAYYRNDKNDTFYDEVKTPSNEVYELEEDFDLEKQEKTRKKQOKERNKEGRSPSRVAPLVYEEENFEGSSPOPOYD  
 201 ARNSFIQNAANTGSNNAHVASQSPIFDISDYGENYYYDNNNINNNLOGNSYNT PSSNHRSPYPTENYQSYOGYKPNQSDRY

# KOG1

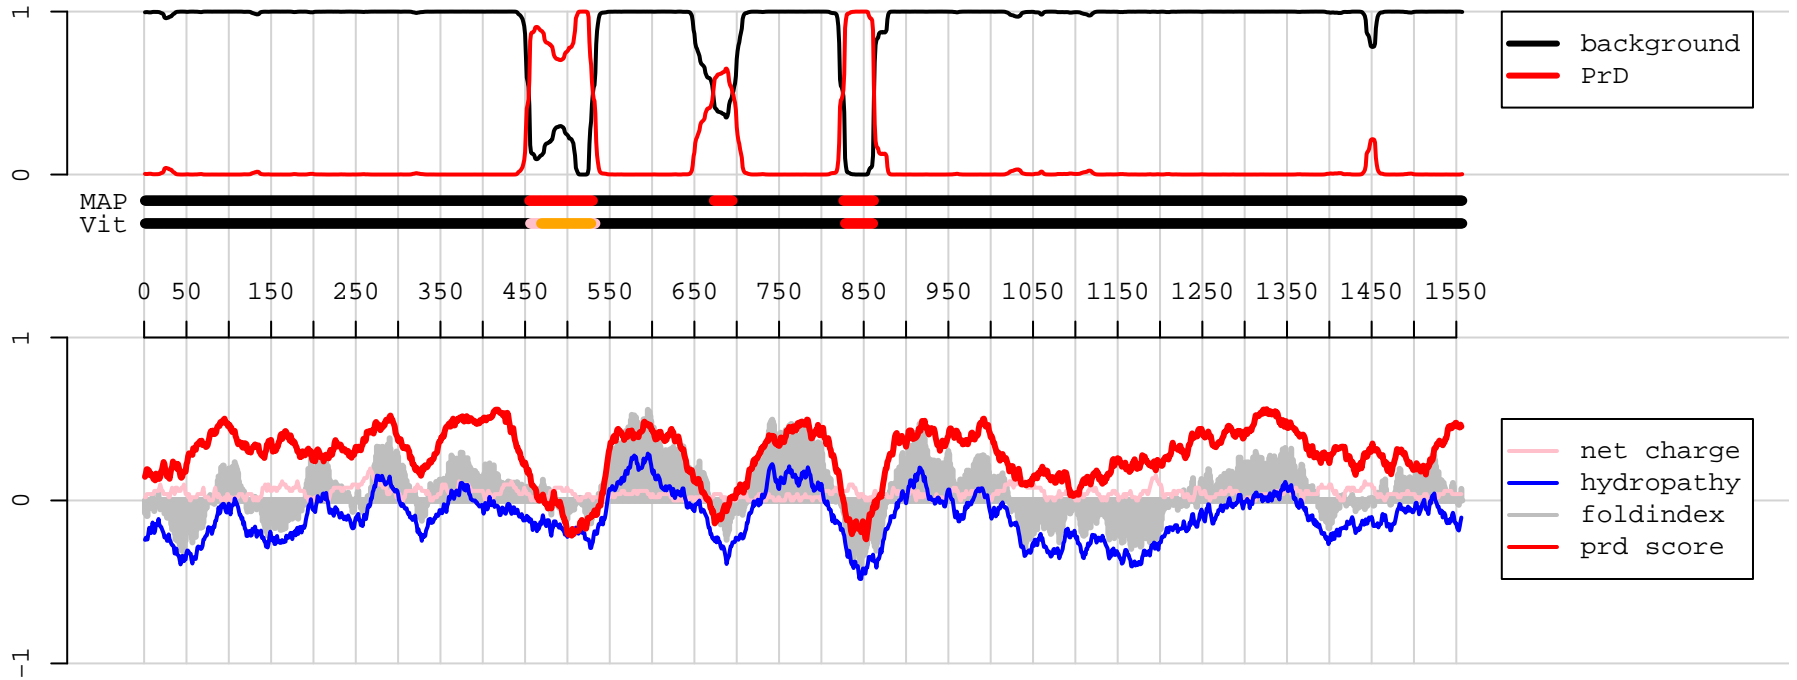

1 MPEIYGPOPLKPLNTVMRHGFEEQYQSDQLLOSLANDFIFYFDDKRHKTNGNPIPEEDKQORDVNRYYQPIITDWKIMKDRQKTVSAALLLCLNLGVDPPDV  
 101 MKTHPCARVEAWVDPLNFQDSKKAIEQIGKNLQAQYETLSLRTRYKQSLDPCVEDVKRFCNSLRRTSKEDRILFHYNHGHGVPKPTKSGEIWVFNRGYTQY  
 201 IPVSLYDLQTLGAPCIFVYDCNSAENILINFQKFVQKRIKDDEEGNHDVAAPSPTSAYQDCFLASCTSDLELLMSPPELADLFSCCLTCPIEISIRIF  
 301 LMQSPLKDSKYKIFFENSTSNQPFQDSDKNSFKSKIPVNIPIGMLSDRRTPLGELNWIFTAITDTIAWTSRPLRPLFKKLFHRHDLMIAALFRNLLAKRIMP  
 401 WYNCHPVSDPELPDSITTHPMWKSWDLAMDEVLTKEVIDLKNAPPATALESQMILQQQETLQNGGSSKSNQAQDTKAGSIOTQSRFAVANLSTMSLVNNPA  
 501 LQSRKSISLOSSOOOLOOOOOOOOOFTGFFEQNLTAFELWLKYASNVRHPPEQLPIVLQVLLSQVHRIRALVLLSRFLDLGPWAVYLSLSIGIFPYVLKL  
 601 LQSPAPELKPILVFIWARIMSIDYKNTQSELIKEKGYMYFVTVLVPDWGVNGMSATNGSAMINSGNPLTMTASONINGPSSRYEROQGNRTSNLGHNNL  
 701 PFYHSNDTTDEQKAMAVFVLASFVRNFPLGQKNCFSLELVNKLCFYIDNSEIPLLRQWCVILLGLLFADNPLNRFVCMNTGAVEILLKLSKDPVPEVRTA  
 801 SIFALKHFISGFQDAEVILRLQEFEEOYOOLHSOLOHLONOSHLOOOSOOOOHLEOOOMKIEQIRHCQVMQLEVIDRKLKRQEIGNLISILPL  
 901 INDGSSLVRKELVVYFSHIVSRYSNFFIVVFNDLLEEIKLLEKSDINTRNTSDKYSVSQGSIFYTVWKSLLILAEDPFLENKELSKQVIDILLESAH  
 1001 KELGGPFAVMEKFLLKRSSKAHQTGKFGFNSSQVFVKSSLRSFSPNERVDNNAFKKEQQHDPKISHPMRTSLAKLFQSLGFSESNSDSDTQSSNTSMK  
 1101 SHTSKKGPSGLYLLNGNNIYPTAETPRFRKHTEPLQLPLNSSFLDSREYFOEPOMKKOEADEPGSVEYNARLWRRNRNETIIOETOGEKKLSIYGNS  
 1201 KKLISLNNKSQPKLMKFAQFEDQLITADDRSTITVFDWEKGKTLSKFSNGTPFGTKVTDLKLINEDDSALLLTGSSDGVIKIYRDYQDVDTFKIVSAWRG  
 1301 LTDMLLTPRSTGLLTEWLQIRGSLLTTGDVKIRVWDAHTETVEVDIPAKTSSLITSLTADQLAGNIFVAGFADGSLRVYDRRLDPRDSMIRRWRAGNDK

# MPT5

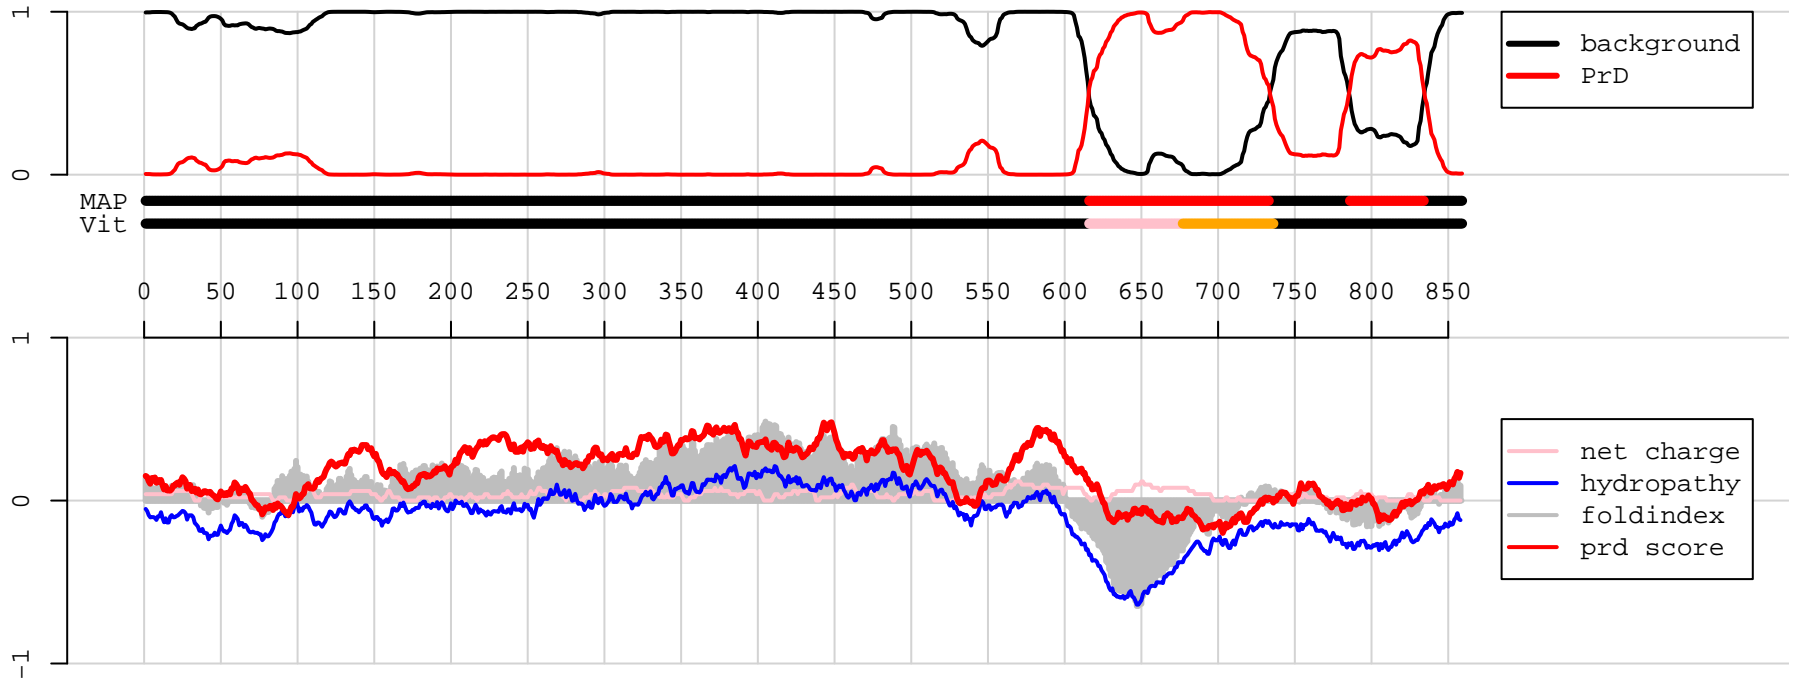

1 MINNEPFPSADSASILTTSTSNNSLMSYNHQPLSINSVQSLLEPVTTPPLGQMNNKRNHQKAHSLDLSGFNQFISSTOSPLALMNNTSTSNANSFSPN  
 101 PNAASNSTGLSASMANPPAILPLINEFDLEMDGPRRKSSHDFTVVAPSNSGVNTSSLIMETPSSSVTPAASLRNFSNSNNAASKCGVDNSSFGLSSSTSS  
 201 SMVEISALPLRDLDYIKLATDQFGCRFLQKLETPSESNMVRDLMEYEQIKPFFLDLILDPFGNYLVQKLCDYLTAEQKTLTIQTIYPNVFQISINQYGR  
 301 SLQKIIDTVDNEVQIDLIKGFSEFTSIEQVVTLINDLNGNHVIQKCIKFSKFGFIIDAIVEQNNIITISTHKHGCCVLQKLLSVCTLQQIFKISV  
 401 KIVQFLPGLINDQFGNYIIQFLLDIKELDFYLLAELFNRLSNELCQLSCLKFSNNVVEKFIKKLFRIITGFIVNNGGASQRTAVASDDVINASMNILLT  
 501 TIDIFTVNLNVLIRDNFGNYALQTLLDVKNYSPLLAYNKNSNAIGQNSSSTLNYGNFCNDFSLKIGNLIVLTKELLPSIKTTSYAKKIKLVKAYAEATG  
 601 IPFTDISPQVTAMSHNNLOTINNENKNPHNKNSHNHNHNHNHNHHAHNNNNNNNNOKSHTRHFSLPANAYHRRSNSVVTNNFNSNOYAODOKIHSPOOIMNFN  
 701 QNAYPSMGAPSFNSOTNPPLVSHNSLQNFQFANLMAHPNSAAPIHFSSSNITVNPVNSRQFQPGFMMNETDKINANHFSFYNSANSONFNFESFV  
 801 PRMOYOTEGANWDSLSMKSOHIGOGPYNQVNMMSRNASISNMPAMNTARTSDELQFTLP

# POG1

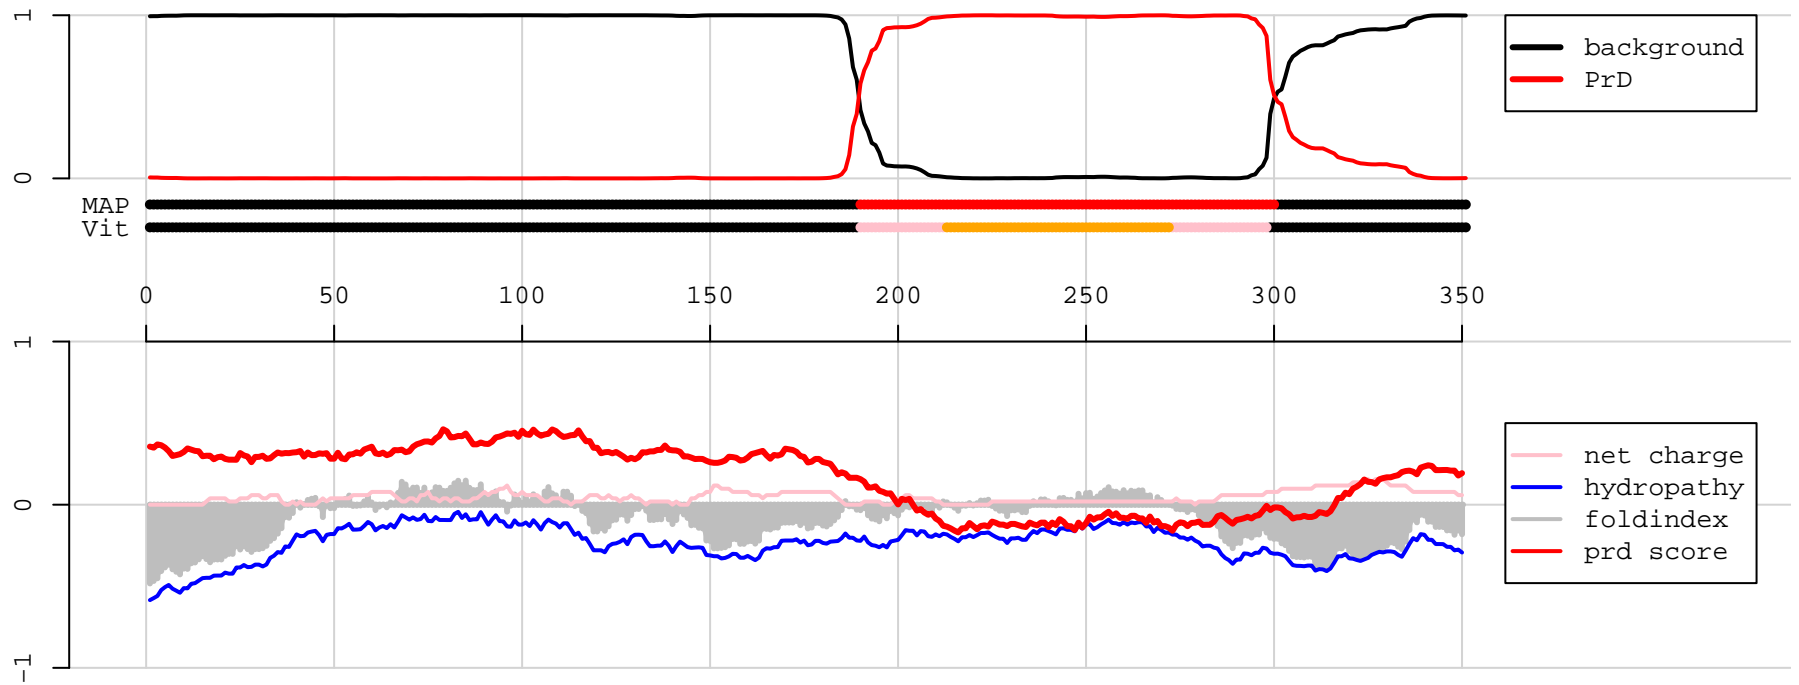

```

1  MKQEPHRQSEEEKPKGPMVEREQHTSLSSGTTVTASTGDESTNSRPVSSQTEKSLSLRIRILKQLGFDDIQELNACDTGLVEQFLNVRLINDTKELE
101 KIRESNLAKLNQIIDKCMESDKISDSTLNKILDMSMNRDTNNDNNNHLTIPSPITTKRKRINASELASPRGHRRYRSDIPTVSEVETGVGYPOIHQOPGA
201 YTLPM PANOWMSNPYMOPPOPOVOQOIMPOYLYPPGMGPOAQLPTMSSNSE SOTPVMS S QFLSLNOHGLYOQNI GAHPVMSMGPOANIYGOOHOLOPGOER
301 DOSRKSFSHRRSOSANISMANFRSPMRNPQPASSQRPVNFLIHTPKHPPT

```

# ASK10

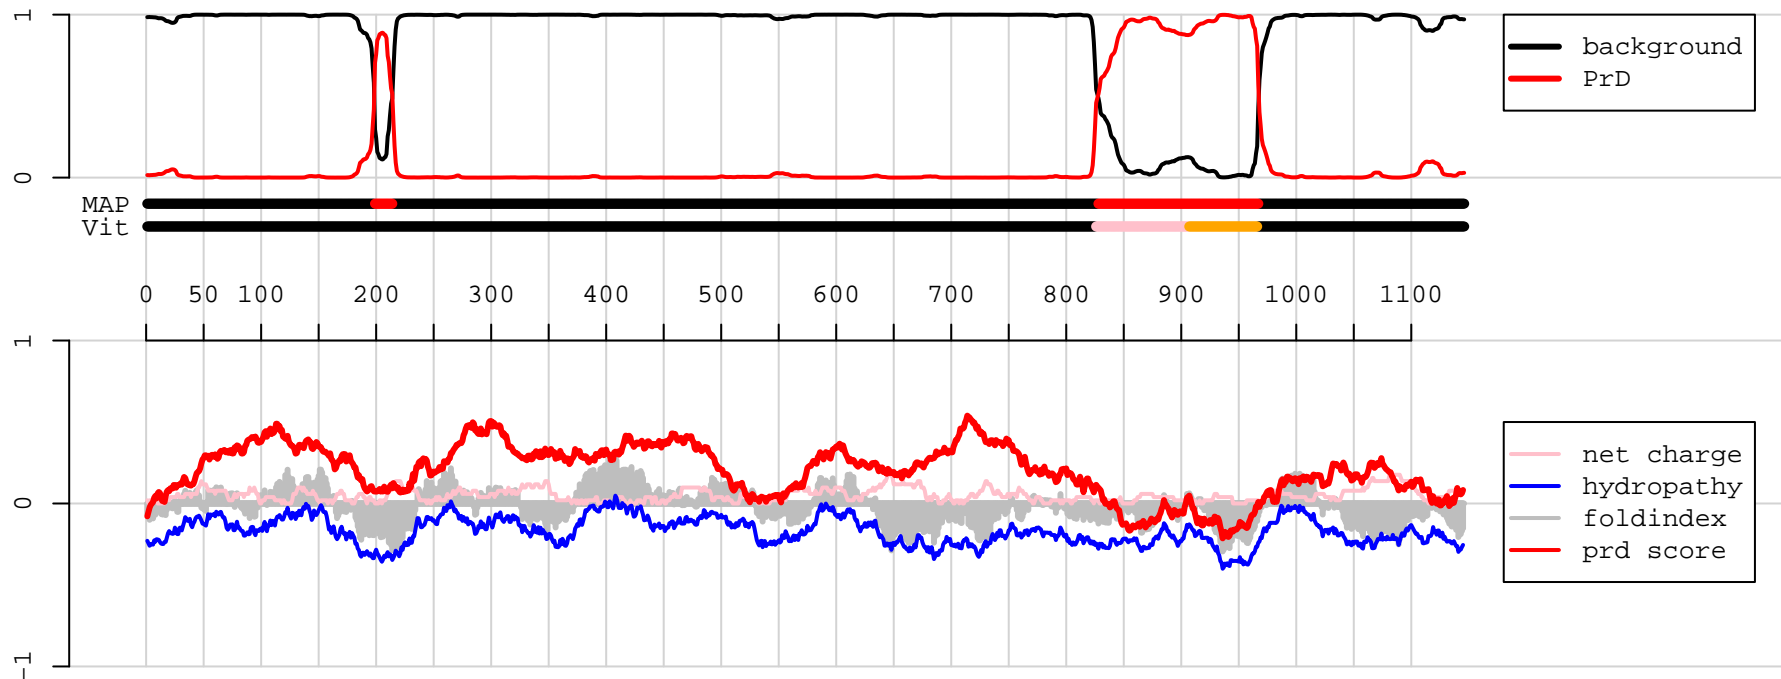

1 MSDYFSSRPSQTLTPMGNKPSGGGGDDASSIHSKSSQYLMDILPDSMTLNESVSSIVANNQAKEFILPETDERSPYFINVPIPKAQPTSTTETKKPLAG  
 101 DEAI DGQFVKEYPTDILVDRFYKWKKILKGLVIYLREVAYAQEQFARINYQLKGSVKFPFLTDIDETTNTITDPFTTAPRGPKKAQPAQKKVGLTDSEQF  
 201 QMOMQOEQENAVQAPTDESKMSLAPHEYKPVOTTESDNTSAASGFVKFGSGSIQDIQVILKKYHLSLANQQFKISKEITSTVIPKLEELRKDLRYKITE  
 301 IKDLHGDFKTNIGAHIQLTSQLLKYYIAAVKFMNAHGIGNDRASPTNKKPHKLDPKHDPYLLKLQDLQDKRQVAEETYLQEAFINLQSSGLQLEKIIYT  
 401 KIQHALLRYSALIDSEARLMIKNMCQELQHGIISKPPAFEDWDFVTQHPSCLLNWKSNDPIPPPRKVSVDVIYPHMKSPKAKCIKAGYFLKKSSELLPTYHQ  
 501 GYFVLTSNYIHEFQSSDFYNLSSSTPNSTKSSAYSSSVSIADTYANANNAKANNHHRQASDVHNSSTTTGGTAGANGIRGIRKKSYLAPIMS IPLNDCTL  
 601 K DASSTKFVLVGKPTLNENADVRKSSSSTYLSGSSQASLPKYGHETAKIFSKAPFHKFLKGSKPKNKNTKSELDOFYAAAQKESNNYVTWTFKIVSPEP  
 701 SEEELKHFKRWVQDLKNLTSFNDTKDRIKFIEDRVMKSHRFKAGHMSRNSVNI GSHTPCLTDSTFTLQDGTTSVNLKGRAEKPYIHIQNNSLADFDGN  
 801 GFRSKVNTPAIDDYGNLITVERRPAOSPHOYSDYMATSGNTPPSYSSGSRPOSMYNGYNPAVSITSNGMMLLOOSTANNNTNPTTNIRHORNISOTSSLPG  
 901 FSYTSLSLPLVNSPGSSNSESSGGYFAIPLHGNNNNNNNYTORNSEGSSPCYNDDOIROOOOPLOMOPLSRTSSSSVNVVTAMRSTSAGNSITANAPVVPKV  
 1001 MVNNQNVKTVAADQSATAPSSPTMNSSVTTINRESPTYOTLKKTNSTGNVPCLTAEKTHAHPAFYKRGNNSAQNLTSSSTASRVHPIRKHKKNVFSSSLN  
 1101 SLMFSKKGANHGGLMTNQFMSSGGIQEDDGDSTNNNDTIKLNQSIYS

# NAM8

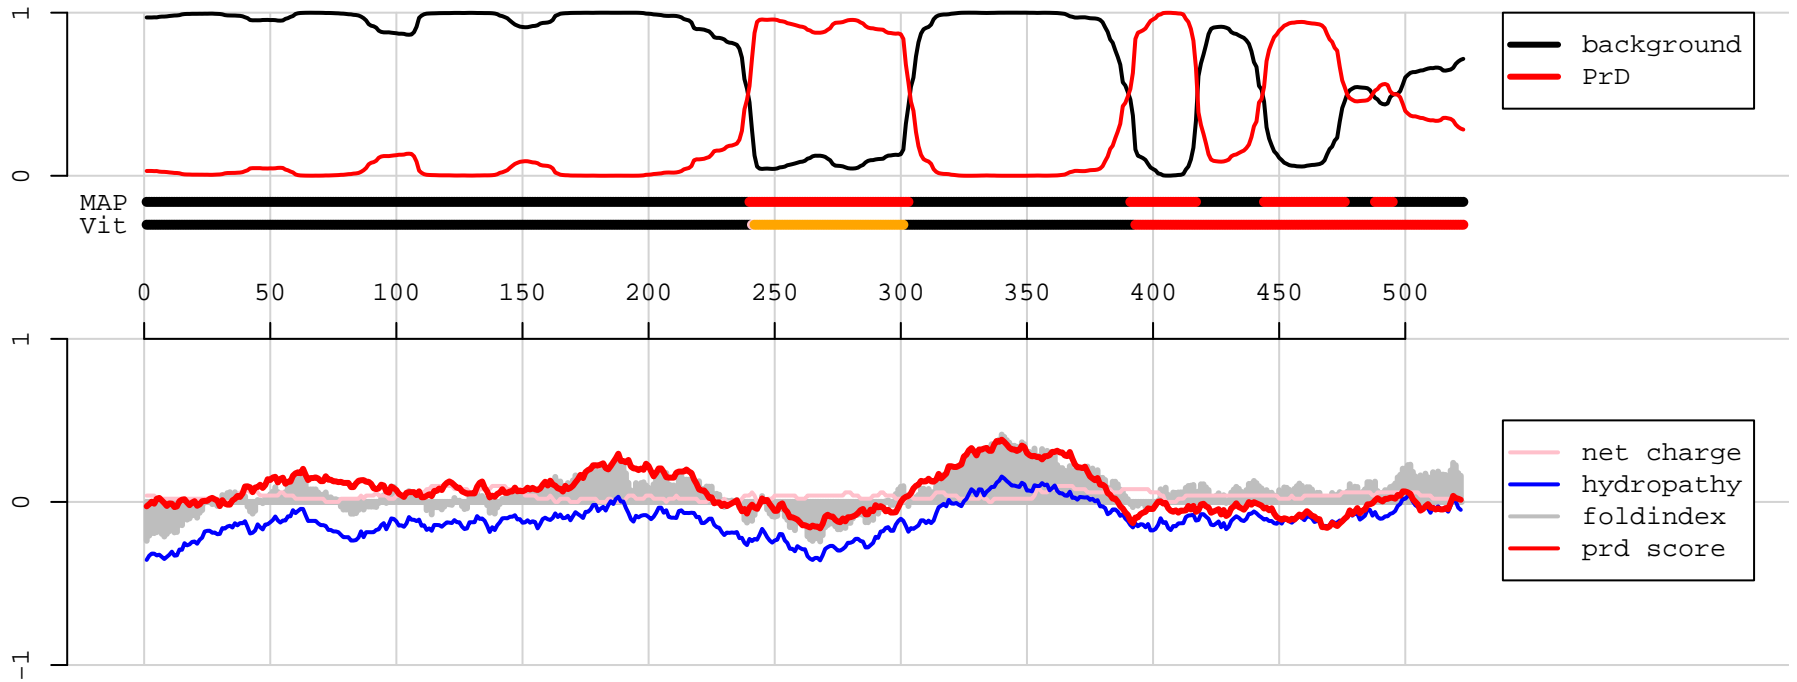

1 MSYKQTTYPSRGNLVRNDSSPYTNTISSSETNNSSTSVLSLQASNVSLGTTGNQLYMGDLDPDPTWDKNTVRQIWASLGEANINVRMMWNNTLNNGRSSM  
 101 GPKNNQGYCFVDFPSSSTHAANALLKNGMLIPNFPNKKLKLNWATSSYSNSNNSLNNVKSNNCSIFVGDLPANVTESQLFELFINRYASTSHAKIVHDQV  
 201 TGMSKGYGFVKFTNSDEQQLALSEMGGVFLNGRAIKVGPTSGQQQHVSGNNDYNRSSSSLNNENVDSRFLSKGOSFLSNGNNNMGGFKRNHMSQFIYPVQQ  
 301 QPSLNHFTDPNNTTVFIGGLSSLVTEDELRAYFQPFGTIVYVKIPVGKCCGFVQYVDRLSAEAAIAGMQGFPIANSRVRLSWGRSAKOTALLQOAMLSNS  
 401 LQVQQQQPGLQOPNYGYIPSSTCEAPVLPDNNVSSTMLPGCQILNYSNPYANANGLGSNNFSFYSNNNATNTQATSLLADTSSMDLSGTGGQQVIMQGE  
 501 AVVNSTNAMLNRLEQGSNGFMFA



# PBP1

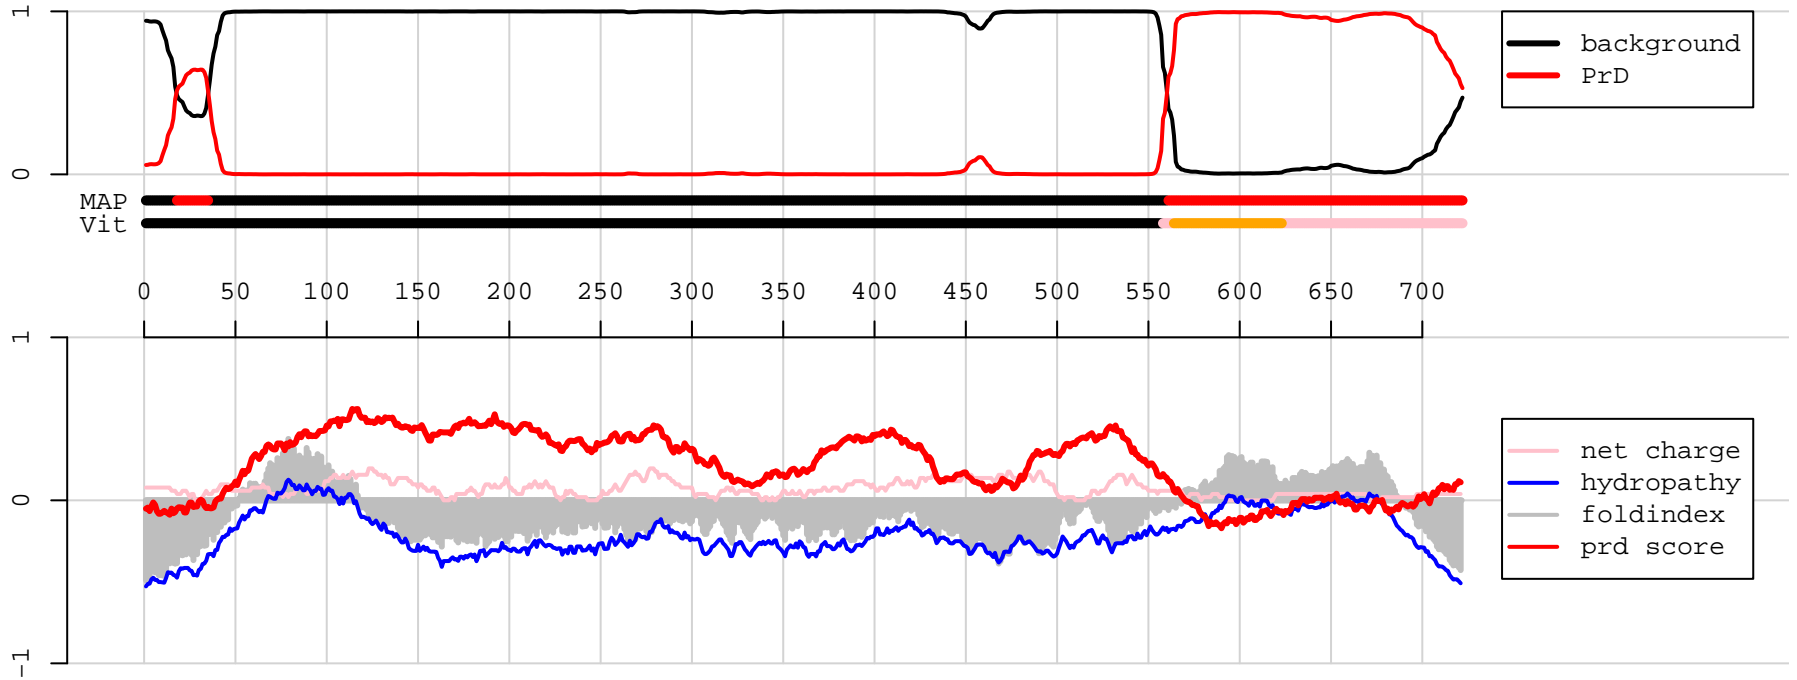

1 MKGNFRKRDSSTNSRKGGNSDSNYTNGGVPNONNSSMFYENPEITRNFDDRQDYLLANSIGSDVTVTVTSGVKYTGLLVSCNLESTNGIDVVLRFPRVAD  
 101 SGVSDSVDDLAKTLGETLLIHGEDVAELELKNIDLSDLDEKWENSKAQETTPARTNIEKERVNGESNEVTKFRTDVDISGSGREIKERKLEKWTPEEGA  
 201 FDINKGKALEDSDASWDQFAVNEKKFGVKSTFDEHLYTTKINKDDPNYSKRLQEAERIAKEIESQGTSGNIHIAEDRGI IIDDSGLDEEDLYSGVDRRGD  
 301 ELLAALKSNSKPNNSKGNRYVPPTLRQOPHHMDPAIISSNSNKNENAVSTDTSTPAAAGAPEGKPPQKTSKNKKSLSKSEAQIEELKKFSEKFKVPYDI  
 401 PKDMLEVLKRSSSTLKSNSLPPKPI SKTPSAKTVSPTTQISAGKSESRRSNISOQSSTGHTTRSSTSLRRRNHGSFFGAKNPHTNDAKRVLFGKSF  
 501 NMFIKSKEAHDEKKGDDASENMEPFFIEKPYFTAPTWLNTIEESYKTFPPDEDTAIOEAOTRFQORQLNSMGNVPGMNPAMGMNMGMMGFPMGGPSA  
 601 SPNPMMNNGFAAGSMGMYPFQPPQPMFYHPSMPQMPVVMGSNGAEEGGNI SPHVPAAGFMAAGPGAPMGAFGYPCGIPFQGMMSGSPSGMPANGSAMHSHG  
 701 HSRNYHOTSHHGHHSSTSGHK

# MSN1

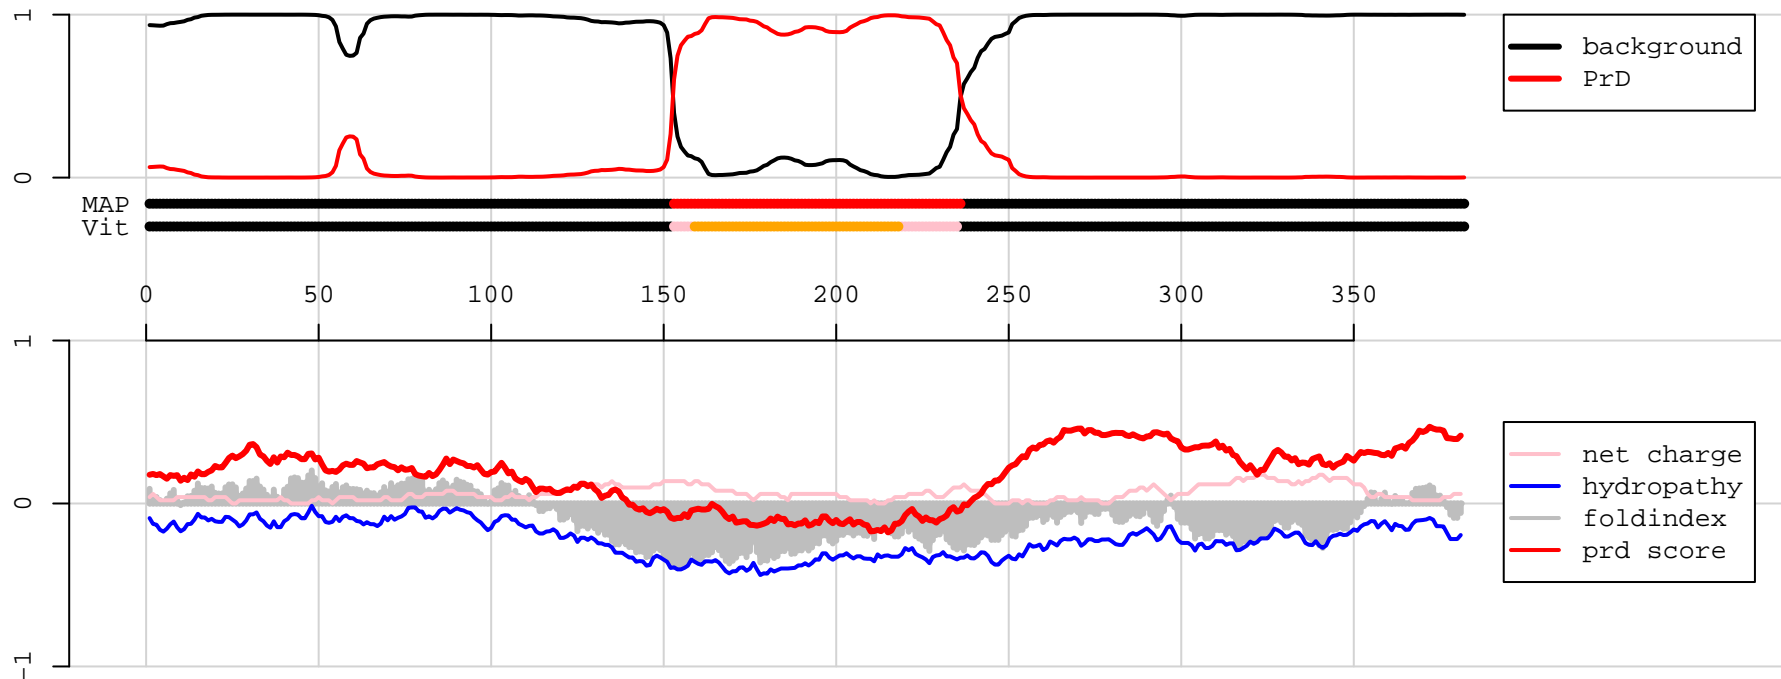

1 MASNQHIGASNLNENEAILTNRVAELERRMSMFEGIFHALSNRLDLHFKKYDVVVNSQQQINELTAFLLSTLLNDQQRHAEILSEKLSGTLHGVSATSIS  
 101 LSQTLDPQGFDTGTTAPGAPRNYTSVPMNNDQTAHPQNEGAVSNETLFEDILNGNSOENDKSQOOTNSSNSISOENNSTNPSVDTRFNKPONYSNLVPS  
 201 LEEYSANPPNNDGGQSOGLYISSNSSOSROSPNLOKVPNHENAVESNAQESVPTFEEEOYETKTGLKRKRIVCTRPFEFIKSPHSVMEVWKEYTEGVNG  
 301 QPSIRKMEALYQTAWRRDPAVNKRYSRKVLWKAIQTGLNRGYSLNYVVEILENSRYVNDKQKVKQPIGWLCHSSHIPETLK

# SPT5

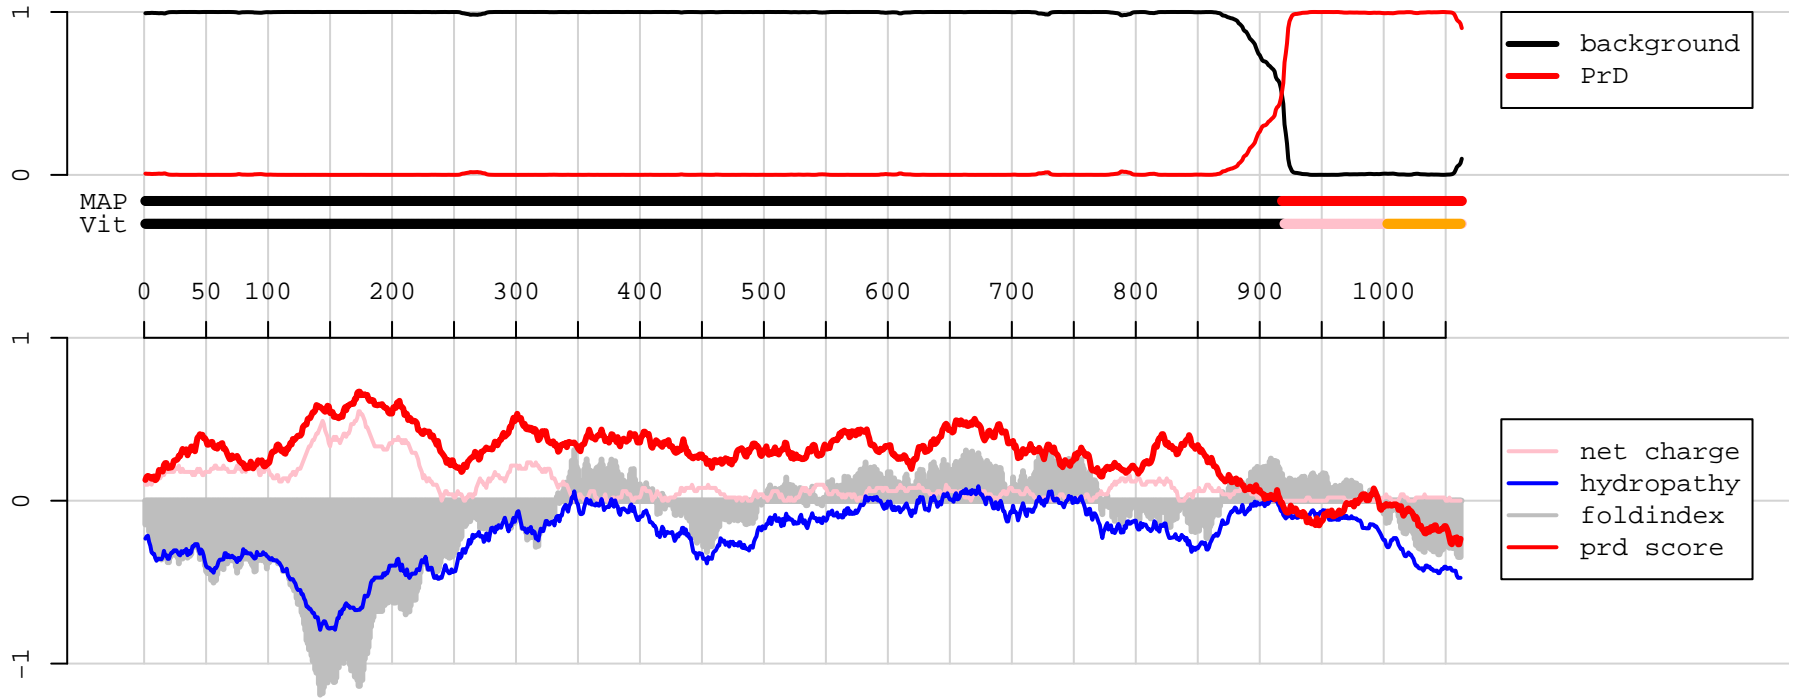

1 MSDNSDTNVSMQDHDQOFADPVVVVQSTDTKDENTSDKDTVDSGNVTTTESTERAESTSNIPPLDGEEKEAKSEPOQPEDNAETAATEQVSSSNGPATDD  
 101 AQATLNTDSSEANEIVKKEEGSDERKRPREEDTKNSDGDTKDEGDNKDEDDDDDDDDDDDDDDDEAPTKRRRQERNRFLDIEAEVSDDEDEDEDEDEDS  
 201 ELVREGFITHGDDDEDEASAPGARRDDRRLHRQLDQDLNKTSEEDAORLAKELRERYGRSSSKQYRAAAQDGYVPQRFLLPSVDTATIWGVRCPGKEKEL  
 301 IRKLLKKKFNLDRAMGKKLKLILSIFORDNYTGRIYIEAPKQSVIEKFCNGVVDIYISQKLLIPVQELPLLLKPNKSDDVALEEGSYVRIKRGYKGDLA  
 401 MVDQISENNLEVMLKIVPRLDYGKFDEIDPTTQORKSRRPTFAHRAPPOLFNPMTALRLDQANLYKRDDRHFYKNEDYIDGYLYKSFRIQHVETKNIQP  
 501 TVEELARFGSKEGAVDLTSSVSQSIKKAQAAKVTFOQGDRIEVLNGEQORSGKIVTRTTKDIATIKLNGFTTPLEFPISTLRKIFEPGDHVTVINGEHQGD  
 601 AGLVLMVEQGQVTFMSTQTSREVTITANNLSKSIDTTATSSSEYALHDIVELSAKNVACIIQAGHDIFKVIDETGKVSTITKGSILSKINTARARVSSVDA  
 701 NGNEIKIGDTIVEKVGSRREGQVLYIQTQQIFVVSKKIVENAGVFVVNPSNVEAVASKDNMLSNNKMDLSKMNPEIISKMGPPSSKTFQOPIQSRGGREVA  
 801 LGKTVIRIRSAGYKQGLGIVKDVNGDKATVELHSKNKHITIDKHKLTYYNREGGEGITYDELVNRGRVFPQARMGPSYVSAPRNMATGGIAAGAAATSSGL  
 901 SGGMTPGWSSFDGGKTPAVNAHGGSGGGGVSSWGGASTWGGGCGNGGASAWGGAGGGA SAWGGOGTGTATSTWGGASAWGNKSSWGGASTWASGGESNGAMS  
 1001 TWGGTGDRSAYGGASTWGGNNNNKSTRDGGASAWGNODDGNRSAWNNOGNKSNYGGNSTWGGH

# CAF120

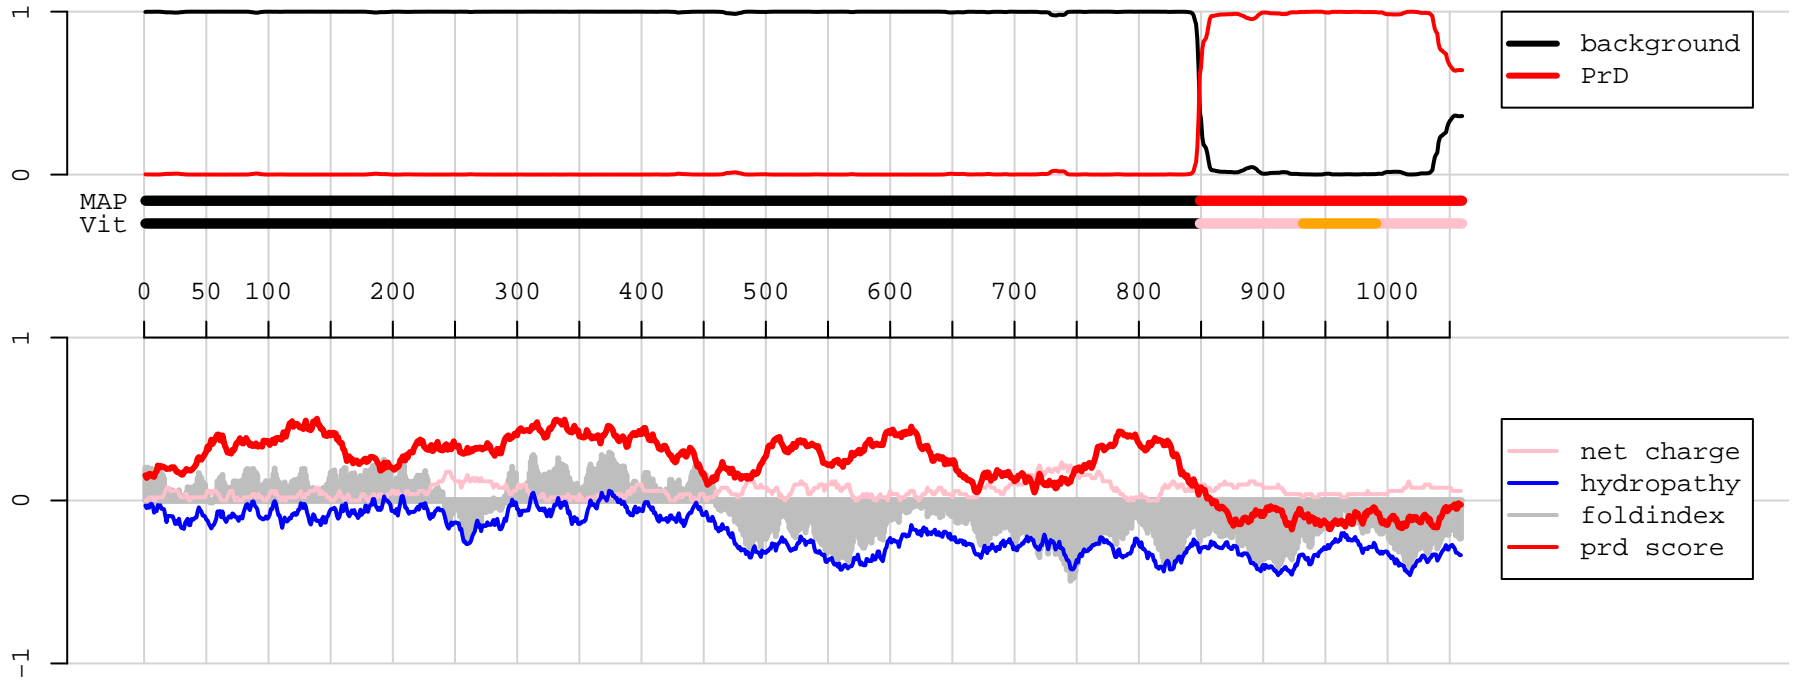

1 MRIFSGDNKVVDSLASNPLMSPSNFGGDFGSRLKVVNTSKKKLNDSSPTSPMESSPVSPPELVPIILTLNAHTHRRYHEGVFLILQDLNNGGTHAARKWK  
 101 DVYGVLLGTQLALWDAKELAEFTDPSCPVSEKKLKEVASKPTYINLTDLRLTLDNSDNIVMECGKNTNALVVSTTLKNRYFLQFGNKESFNAWNNAIR  
 201 LCLYECSSLQEAYTGAFISSRGAKLGDRIILLTNRKYDYKDWVSVRFAGMPWKRCYAVISQSSSKKKGHFGEINLYENDKKVKNHAMATIVEAKALYA  
 301 VYPSSPKLIDSSTIIKVVGSVKFEKKESAQEKDVFIMPEKHQAVPSYDTIIRFLIPAMDTFKLYGRPEKLLSSKNDPHSLFLGLPVLPHIYYLEVEDLLP  
 401 LTNSVSSLHWSNNEWKEHISDILQRKIAQGYCGCNSTSNITSPPLSPFLGSADLFRADGVLSPKLSYGSKSSSNSSKNLSPKRERVKLSSSSEQDLNN  
 501 SDSPSIKRKSPPLVISESPHKVHTPTDASFRTRVTEGSPYAKQRHPKPFASSVNDSPSDRAKSRTVPYNNNDRKATTPEKFERGETSCGKNVDESLEKVR  
 601 NMKLEIPESNFDKFMTDKNLLSVDSKCSNEKKLSVESDLSAIYEKYSNGPFGHTEGLNGSSDETYLRFQASVHSESNNYSRKSFTPSDFSNNGNEEHAV  
 701 LQELNSLTQRINELGMESINSNSDSDRINGSYSQVDFGNNNDEDDMNLFDPDFMAQDQLRAEERDYNKDDRTPLAKVPAAFQSTGLGITPDDDIERYIIT  
 801 EHRSRHEVPKRSPEKPSNPLEIGNPYAKPGTRLNTHHSTKTDRSITPORGOPVPSGOOLSSYVOPANINSPNKMYGANNSSAMGSPRNPKTRAPPGPYNO  
 901 GWNNRPPSPSNTIYORPHPSDTPPOAYHLPGNPLYSTGNRPNMQAOYHPQOVPMPILOPNRPPYOPYAMNTHMGSPGGYAGAAPPFOPANVNYNTRPOOPWPT  
 1001 PNSPSAHYRPPPNLNOPONGSAGYYRPPAPOLONSOARPOKKGDFSOFMPSATTKNPPYAQ

# VID21

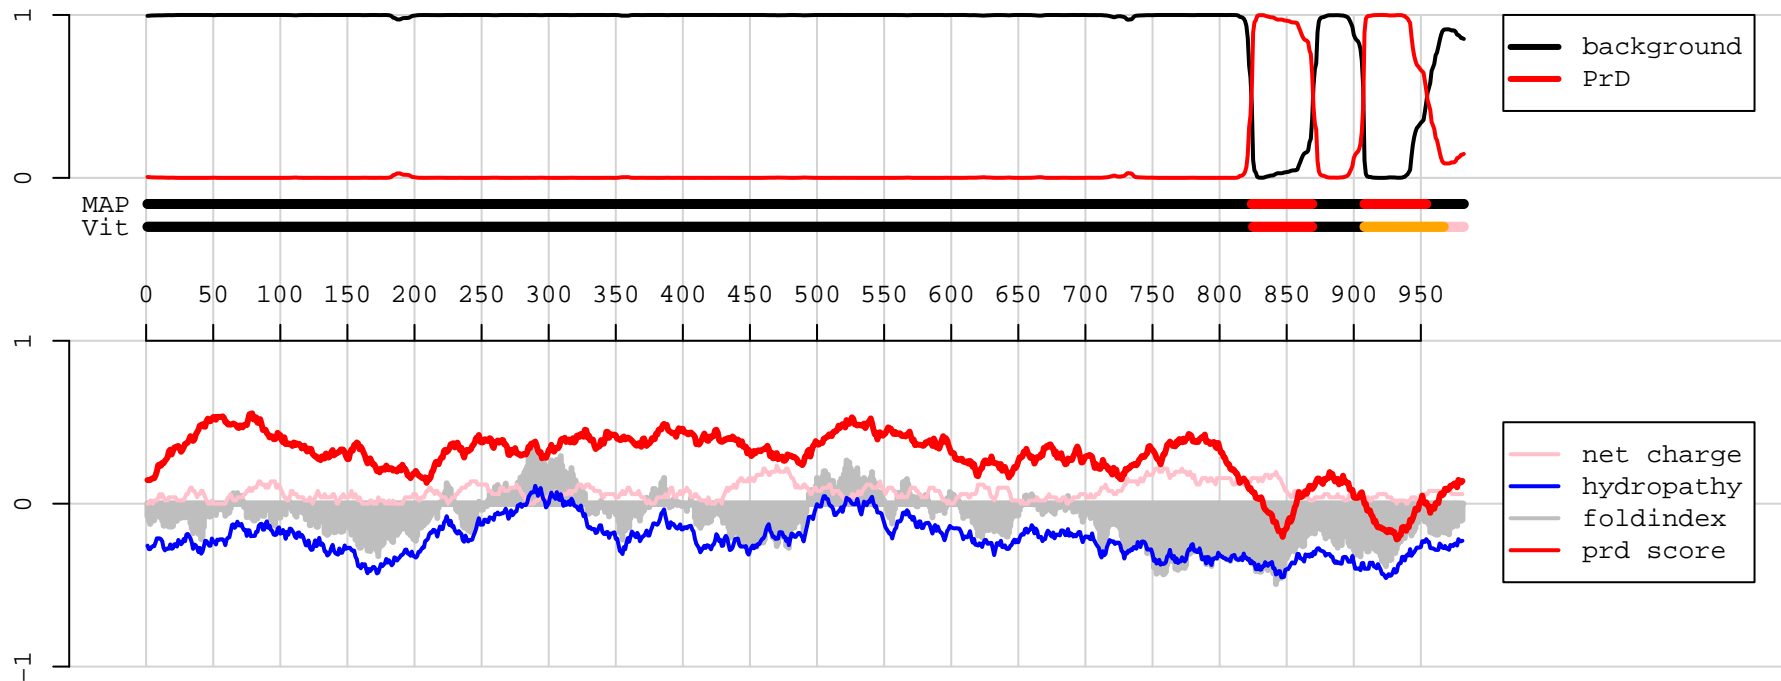

1 MSSRPSSAVPNSASLSEDOSSDRSKFPKADDLIDERDRKLTELYCVSRLNQLLELTDENKLRKEIDAFLLKKNDIRRGIRFDEASLPKLLHTAATPITKKK  
 101 LKDVNLINVPNQRLLSDSKMSRELPESENVSVKSESHFVPSHDNSIRENMMSDLRPAEKTGGMWNKRPLESTMGEEERHEKRQKMOSQSLESSNNSEMA  
 201 SLPISPRPPVPNALAHYTYEYENIEYPPADPTEVQPAVKFKDPLIKNIMAKEIDTSDHYNENNVDALLETVFLLMNDYIPSKIPQALPLAELKYMSQTLPLI  
 301 NLIPRAHKALTTNIINNALNEARITVVGSRIEELRRLGLWLSLROPKRFIDPWKQHNTQNILLEEAKWMQADFKEGHKYKVAICTAMAQAIDYWTYGEI  
 401 CCVKRKTLPLPGKENKLSDDGRISEKSGRPSDTSRNDSDISIA GKDDIGIIANVDDITEKESAAANDNDENGKNEAGAKSDFDFADGLLSQEGAHQDIISS  
 501 IDTKLLKPKSSSSEVVLIQHEVAASSALIEETEEKKELAPPFKLSIFVDELNTFEKTLIQDLPLYNGINEERPKKDDSLPFIPISKSVVSLDDNGFYKL  
 601 LERQLIDEEPSISQLSKRRGMFYGNRRNHYLRPPAVPSLRYLQNRTPTIWLSEDDQELVKNINTYGYNWELISAHMTHRLTYSYLSNIERTPWQCFERF  
 701 VOLNERFNFSDLKGPRAHSAQOWLIEAHKFOQRQNRRI SPLGVNTESIQRGHRRLRWASMFEAIRKCMKKRENTPRPNPTQPRKPLDCKNMKVPTPAEMS  
 801 LLKAQRDEALRRDIQLRRTVKNRLQORQOOSQOAHSSRAQSPIPSNGKSSSNLARNGOASAPRPNOQOYTEQDIIESYSRKLLEQKPDIGPEMALKAANK  
 901 YYRTLREQOOLKOHQIQOOROOLQOESSHVOOLOLOPGSOAPPKSSPSQSSLSNISNINSAPRIKSPTPOEILORFOKO

# YAR010C

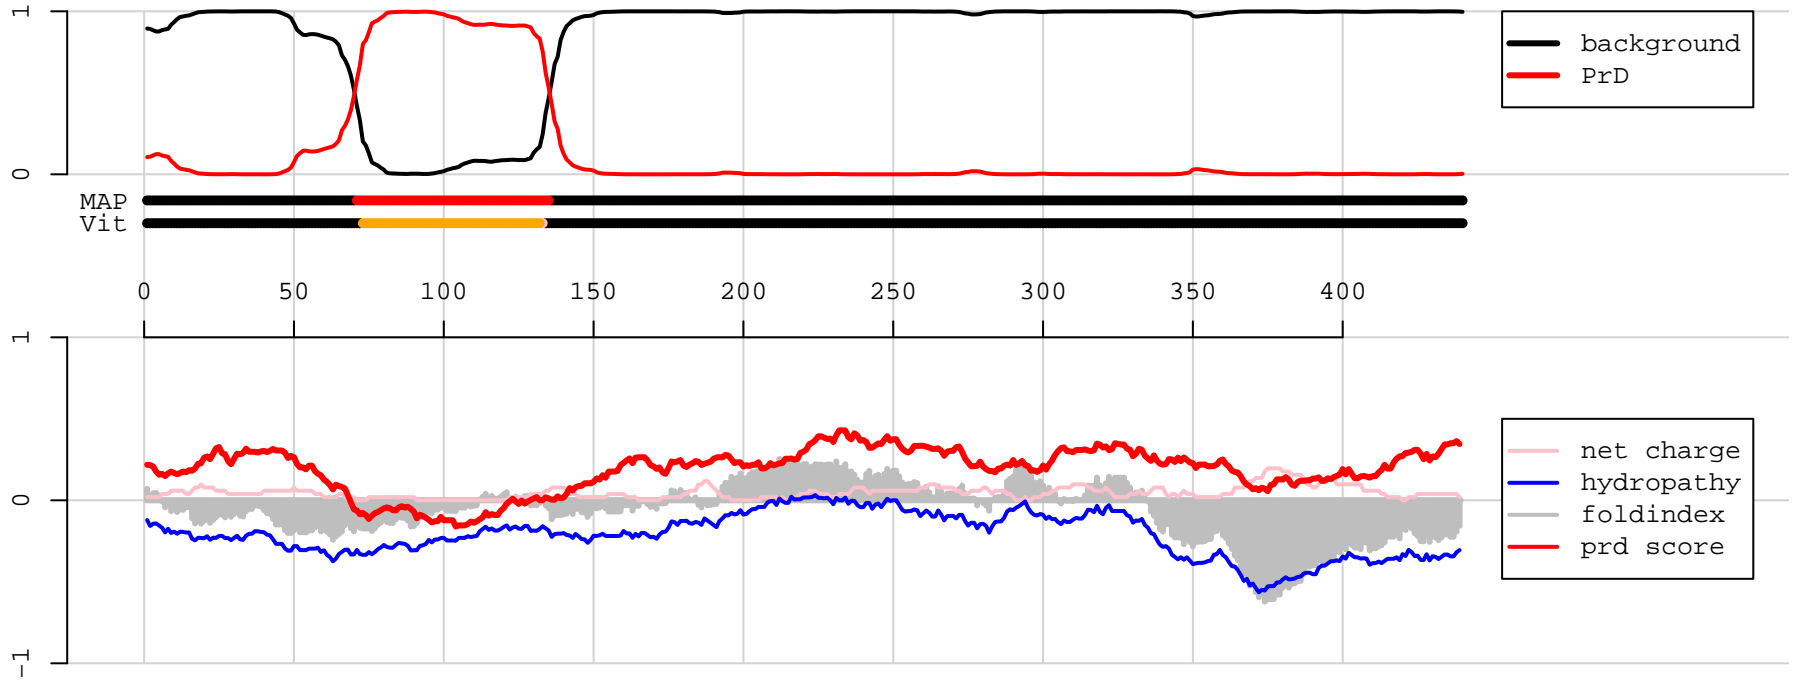

1 MESQQLSQHSPISHGSACASVTSKEVHTNQDPLDVSASKTEECEKASTKANSQOTTPASSAVPENPHHASPOTAOSHSPONGPYPOOCMMTONOANPSG  
 101 WSFYGHPSMIPYTPYOMSPMYFPPGPOSQFPOYPSSVGTPLSTPSPESGNTFTDSSSADSDMTSTKKYVRPPMLTSPNDFPNWVKTYIKFLQNSNLGGI  
 201 IPTVNGKPVQRITDDELTFLYNTFQIFAPSQFLPTWVKDILSVDYTDIMKILSKSIEKMQSDTQEANDIVTLANLQYNGSTPADAFETKVTNIIDRLNNN  
 301 GIHINNKVACQLIMRGLSGEYKFLRYTRHRHLNMTVAELFLDIHAIYEEQOQSRNSKPNYRRNPSEKNDRSYNTNTTKPKVIARNPQKTNNSKSKTARA  
 401 HNVSTSNNSPSTDNDSISKSTTEPIQLNNKHDLHLPETY

YGR027W-A

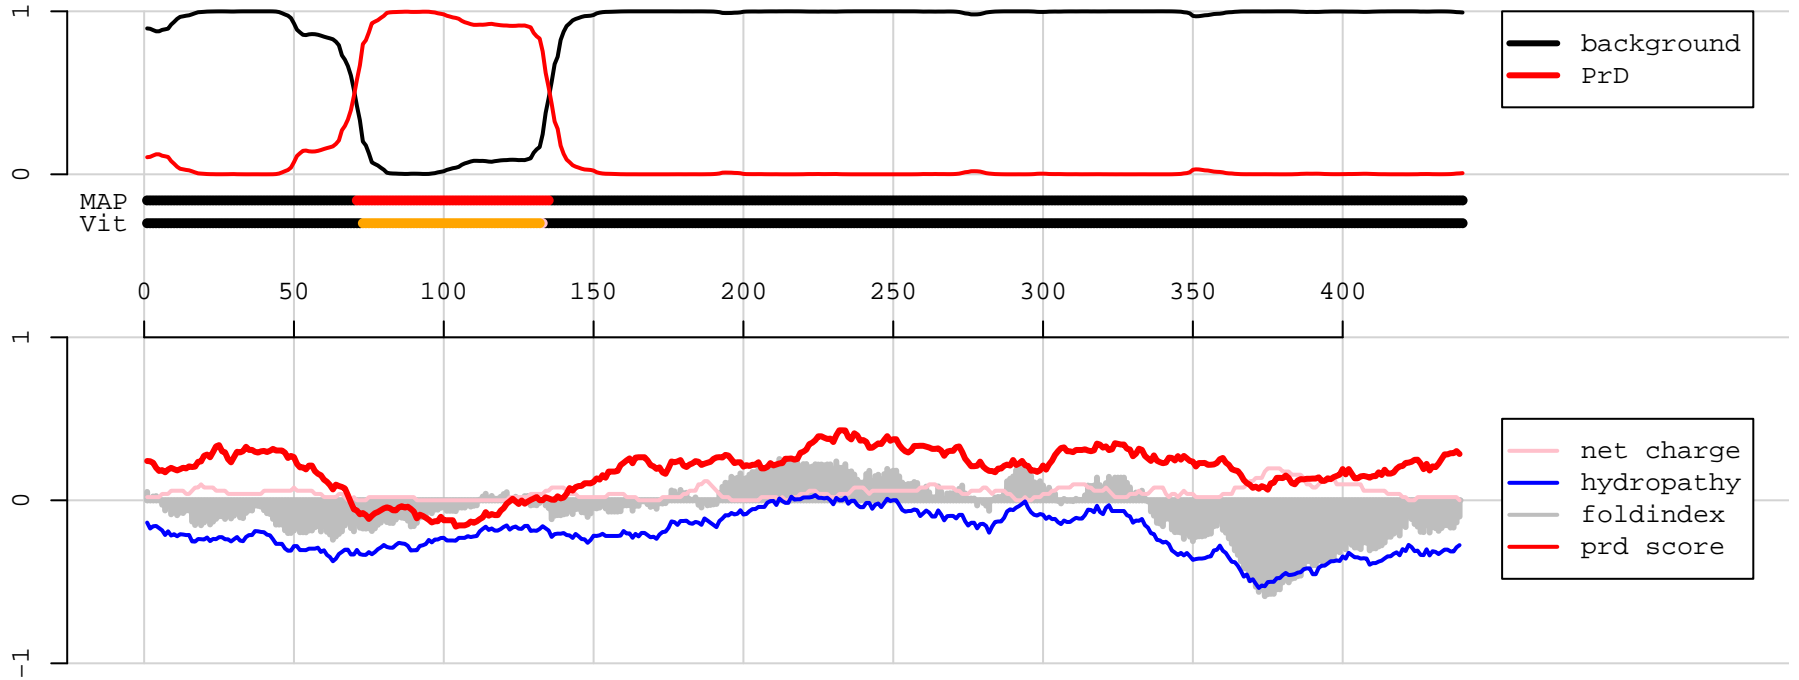

1 MESQQLSQHSHISHGSACASVTSKEVHTNQDPLDVSASKTEECEKASTKANSQOTTPASSAVPENPHHASPOTAOSHSPONGPYPOOCMMTONOANPSG  
 101 WSFYGHPSMIPYTPYOMSPMYFPPGPOSQFPOYPSSVGTPLSTPSPESGNTFTDSSSADSDMTSTKKYVRPPMLTSPNDFPNWVKTYIKFLQNSNLGGI  
 201 IPTVNGKPVQRITDDELTFLYNTFQIFAPSQFLPTWVKDILSVDYTDIMKILSKSIEKMQSDTQEANDIVTLANLQYNGSTPADAFETKVTNIIDRLNNN  
 301 GIHINNKVACQLIMRGLSGEYKFLRYTRHRHLNMTVAELFLDIHAIYEEQOQSRNSKPNYRRNLSDEKNDSRSYNTNTTKPKVIARNPQKTNNSSKSKTARA  
 401 HNVSTSNNSPSTDNDSISKSTTEPIQLNNKHDLHLRPGTY

YGR027W-B

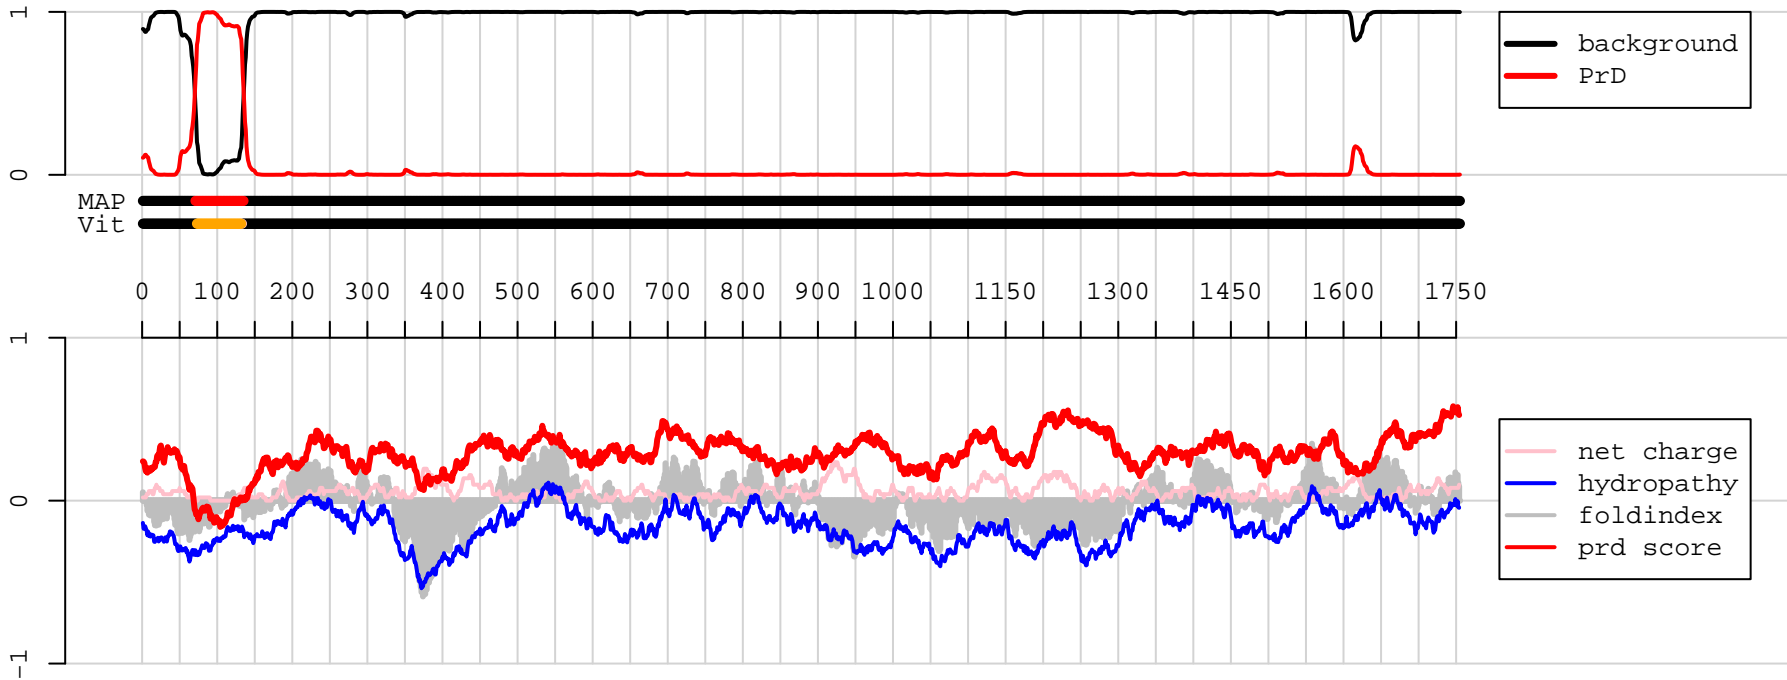

1 MESQQLSQHSHISHGSACASVTSKEVHTNQDPLDVSASKTEECEKASTKANSQOTTPASSAVPENPHHASPOTAOSHSPONGPYPOOCMMTONOANPSG  
 101 WSFYGHPSMIPYTPYQMSPMYFPPGPOSQFPOYPSSVGTPLSTPSPESGNTFTDSSSADSDMTSTKKYVRPPMLTSPNDFPNWVKTYIKFLQNSNLGGI  
 201 IPTVNGKPVQRITDDELTFLYNTFQIFAPSQFLPTWVKDILSVDYTDIMKILSKSIEKMQSDTQEANDIVTLANLQYNGSTPADAFETKVTNIIDRLNNN  
 301 GIHINNKVACQLIMRGLSGEYKFLRYTRHRHLNMTVAELFLDIHAIYEEQOQSRNSKPNYRRNLSDEKNDRSYTNNTTKPKVIARNPQKTNNSKSKTARA  
 401 HNVSTSNNSPSTDNDSISKSTTEPIQLNNKHDLHLGOELTESTVNHTNHSDDDELPGHLLLDSGASRTLIRSAHHIHSASSNPDINVVDAQKRNIPIINAIG  
 501 DLQFHFQDNTKTSIKVLHTPNIAVDLLSLNELAAVDITACFTKNVLESDGTVLAPIVQYGDYFVWVSKRYLLPSNISVPTINNVHTSESTRKYPPYPIHR  
 601 MLAHANAQTIIRYSLKNNTITYFNESDWDSSAIDYQCPDCLIGKSTKHRHIKGSRLKYQNSYEPFOYLHTDIFGPVHNLPKSAPSYFISFTDETTKFRWV  
 701 YPLHDRREDSILDVFTTILAFIKNQFQASVLVIQMDRGSEYTNRTLHKFLEKNGITPCYTTTADSRAGVAERLNRTLDDCRTQLQCSGLPNHLWFSAI  
 801 EFSTIVRNSLASPKSKKSARQHAGLAGLDISTLLPFGQPVIIVNDHNPNSKIHPRGIPGYALHPSRNSYGYIIYLP SLKKTVDTTNYVILQGESRLDQFN  
 901 YDALTFDEDLNRLTASYHSFIASNEIQESNDLNIESDHDFOQSDIELHPEQPRNVLSKAVSPTDSTPPSTHTEDSKRVSKTNIRAPREVDPNISESNILPS  
 1001 KKRSTPQIISNIESTGSGGMHKLNVPLLAPMSQSNTHESHASKSKDFRHSDSYSENETNHTNVPISSTGGTNNKTVPQISDQETEKRIIHRSPSIDASP  
 1101 PENNSSHNIVPIKTPPTVSEQNTTEESIIADLPLPDLPPESPTEFPDPFKELPPINSRQTNSSLGGIGDSNAYTTINSKKRSLEDNETEIKVSRDWTWNTKN  
 1201 MRSLEPPRSKKRIHLIAAVKAVKSIKPIRTTLRYDEAITYNKDIKEKEYIEAYHKEVNQLLKMKTWDTDEYYDRKEIDPKRVINSMFIFNKKRDGTHKA  
 1301 RFVARGDIQHPDITYDSGMQSNVTHHYALMTSLSLALDNNYYITQLDISSAYLYADIKEELYIRPPPHLGMNDKLIIRLKKSLYGLKQSGANWYETIKSYLI



# YJR028W

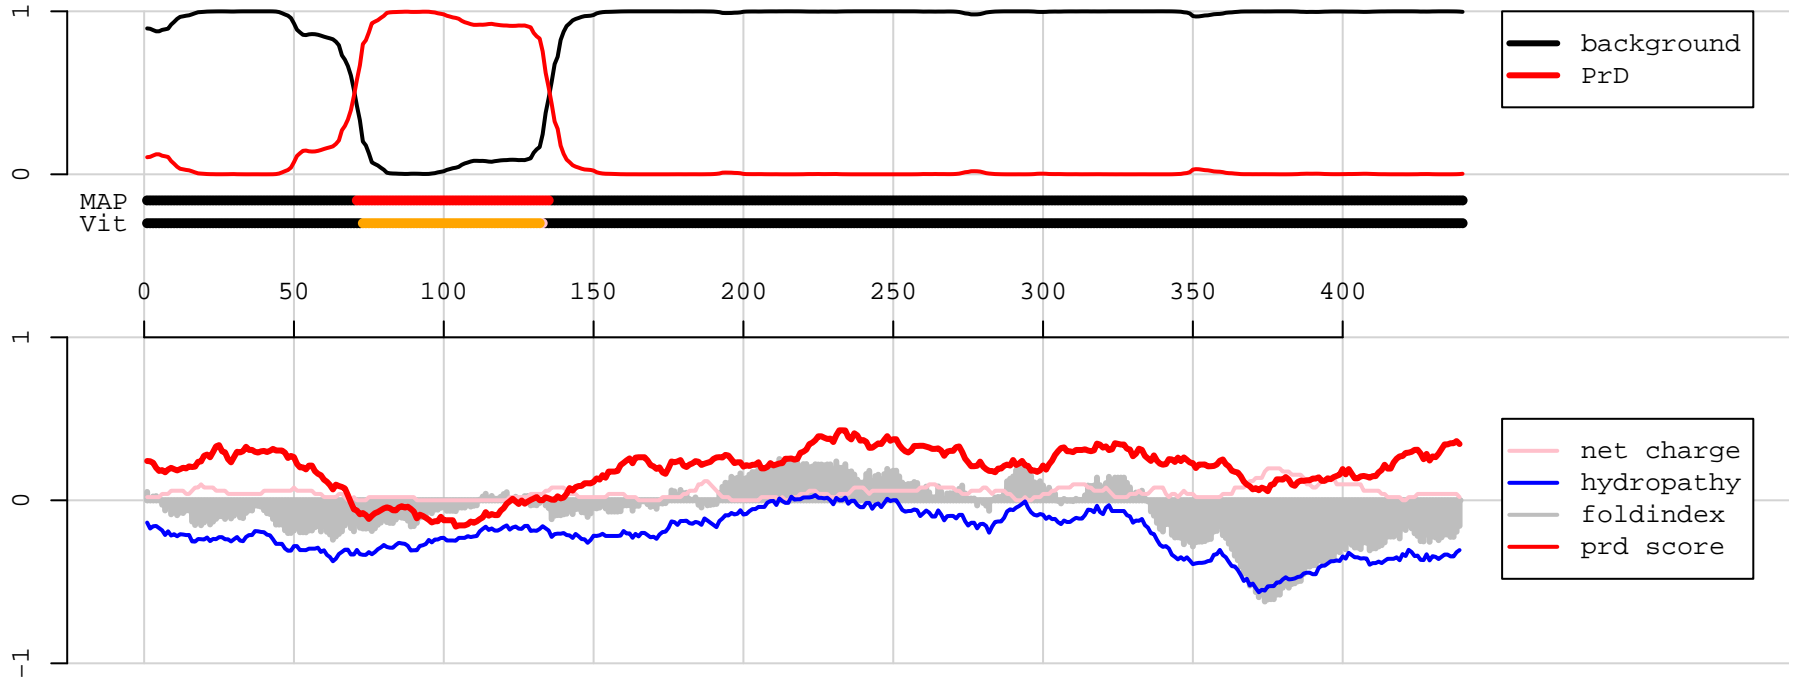

1 MESQQLSQHSHISHGSACASVTSKEVHTNQDPLDVSASKTEECEKASTKANSQOTTPASSAVPENPHHASPOTAOSHSPONGPYPOOCMMTONOANPSG  
 101 WSFYGHPSMIPYTPYOMSPMYFPPGPOSQFPOYPSSVGTPLSTPSPESGNTFTDSSSADSDMTSTKKYVRPPPLTSPNDFPNWVKTYIKFLQNSNLGGI  
 201 IPTVNGKPVQRITDDELTFLYNTFQIFAPSQFLPTWVKDILSVDYTDIMKILSKSIEKMQSDTQEANDIVTLANLQYNGSTPADAFETKVTNIIDRLNNN  
 301 GIHINNKVACQLIMRGLSGEYKFLRYTRHRHLNMTVAELFLDIHAIYEEQOQSRNSKPNYRRNPSEKNDRSYNTNTTKPKVIARNPQKTNNSSKSKTARA  
 401 HNVSTSNNSPSTDNDSISKSTTEPIQLNNKHDLHLPETY

# YJR029W

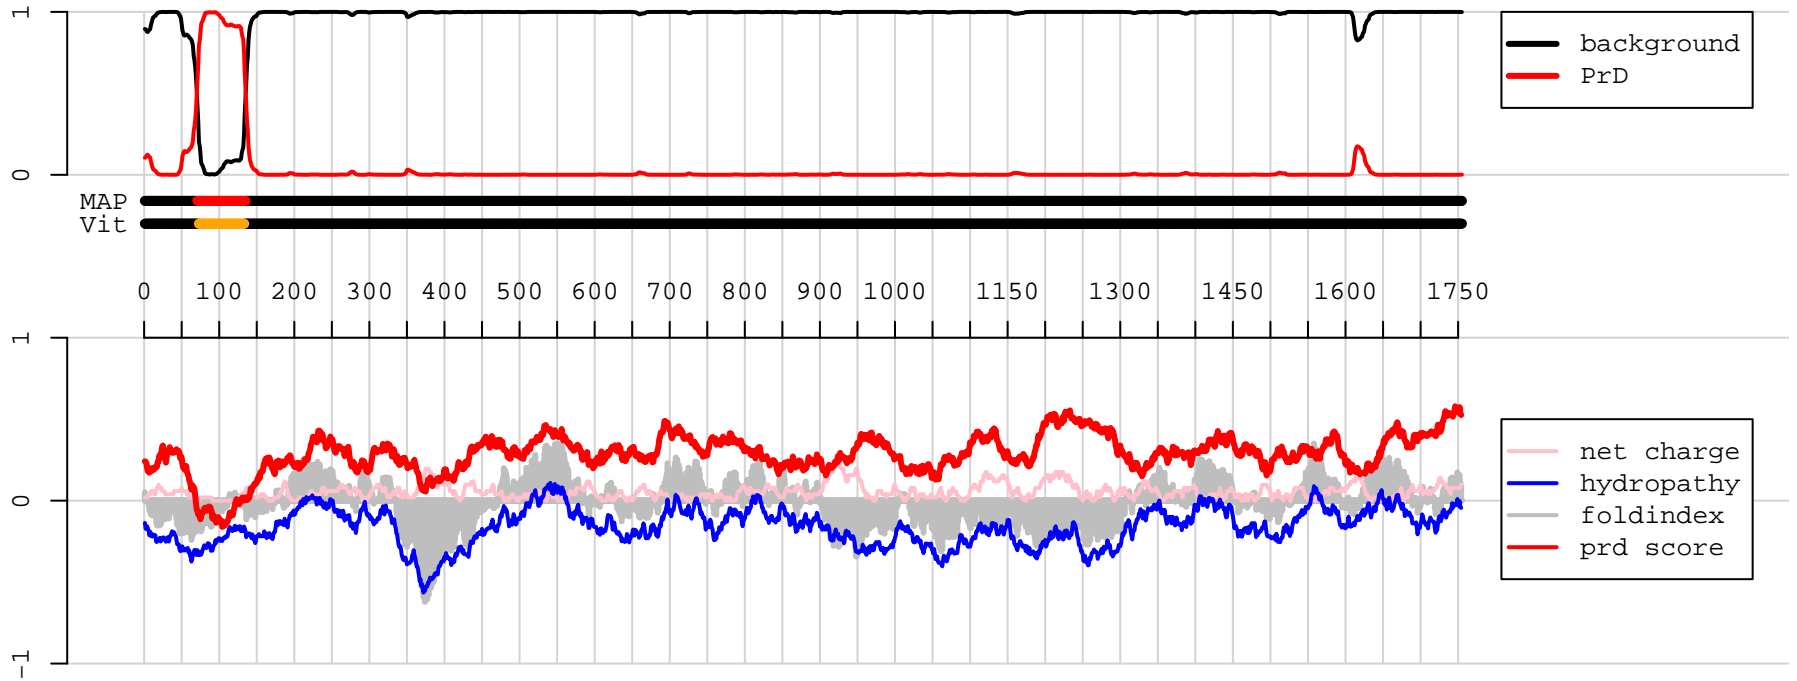

```

1  MESQQLSQHSHISHGSACASVTSKEVHTNQDPLDVSASKTEECEKASTKANSQOTTPASSAVPENPHHASPOTAOSHSPONGPYPOOCMMTONOANPSG
101  WSFYGHPSMIPYTPYQMSPMYFPPGPOSQFPOYPSSVGTPLSTPSPESGNTFTDSSSADSDMTSTKKYVRPPMLTSPNDFPNWVKTYIKFLQNSNLGGI
201  IPTVNGKPVQRITDDELTFLYNTFQIFAPSQFLPTWVKDILSVDYTDIMKILSKSIEKMQSDTQEANDIVTLANLQYNGSTPADAFETKVTNIIDRLNNN
301  GIHINNKVACQLIMRGLSGEYKFLRYTRHRHLNMTVAELFLDIHAIYEEQOQSRNSKPNYRRNP SDEKNDRSYTNNTTKPKVIARNPQKTNNSSKKTARA
401  HNVSTSNNSPSTDNDSISKSTTEPIQLNNKHDLHLGOKLTESTVNHTNHSDDDELPGHLLLDSGASRTLIRSAHHIHSASSNPDINVVDAQKRNIPIINAIG
501  DLQFHFQDNTKTSIKVLHTPNIAVDLLSLNELAAVDITACFTKNVLESDGTVLAPIVKYGDFYVWSKKYLLPSNISVPTINNVHTSESTRKYPPYFIHR
601  MLAHANAQTI RYSLKNNTITYFNESDWDSSAIDYQCPDCLIGKSTKHRHIKGSRLKYQNSYEPFOYLHTDIFGPVHNLPKSAPSYFISFTDETTKFRWV
701  YPLHDRREDSILDVFTTILAFIKNQFQASVLVIQMDRGSEYTNRTLHKFLEKNGITPCYTTTADSRAGVAERLNRTLDDCRTQLQCSGLPNHLWFSAI
801  EFSTIVRNSLASPKSKKSARQHAGLAGLDISTLLPFGQPVI VNDHNPNSKIHPRGIPGYALHPSRNSYGYIIYLP SLKKTVDTTNYVILQGESRLDQFN
901  YDALTFDEDLNRLTASYQSF IASNEIQOSDDLNI ESDHDFQSDIELHPEQPRNVLSKAVSPTDSTPPSTHTEDSKRVSKTNIRAPREVDPNISESNILPS
1001  KKRSTPQI SNIESTGSGGMHKLNVLLAPMSQSNTHESHASKSKDFRHSDSYSENETNHTNVPISSTGGTNNKTVPQISDQETEKRIIHRSPSIDASP
1101  PENNSSHNIVPIKTPPTVSEQNT EESI IADLPLPDLPPESPTEFPDPFKELPPINSRQTNSSLGGIGDSNAYTTINSKKRSLEDNETEIKVSRDWTWNTKN
1201  MRSLEPPRSKKRIHLIAAVKAVKSIKPIRTTLRYDEAITYNKDIKEKEYIEAYHKEVNQLLKMKTWDTDEYYDRKEIDPKRVINSMFIFNKKRDGTHKA
1301  RFVARGDIQHPD TYDSGMQSN TVHHYALMTSLSLALDNNYYITQLDISSAYLYADIKEELYIRPPPHLGMNDKLI RLLKKS LYLGLKQSGANWYETIKSYLI

```

YPR137C-A



1 MESQQLSQHSPISHGSACASVTSKEVHTNQDPLDVSASKTEECEKASTKANSQOTTPASSAVPENPHHASPOTAOSHSPONGPYPOOCMMTONOANPSG  
 101 WSFYGHPSMIPYTPYOMSPMYFPPGPOSQFPOYPSSVGTPLSTPSPESGNTFTDSSSADSDMTSTKKYVRPPPLTSPNDFPNWVKTYIKFLQNSNLGGI  
 201 IPTVNGKPVQRITDDELTFLYNTFQIFAPSQFLPTWVKDILSVDYTDIMKILSKSIEKMQSDTQEANDIVTLANLQYNGSTPADAFETKVTNIIDRLNNN  
 301 GIHINNKVACQLIMRGLSGEYKFLRYTRHRHLNMTVAELFLDIHAIYEEQOQSRNSKPNYRRNPSDEKNDSRSYNTNTTKPKVIARNPQKTNNSKSKTARA  
 401 HNVSTSNNSPSTDNDSISKSTTEPIQLNNKHDLHLPETY

YPR137C-B

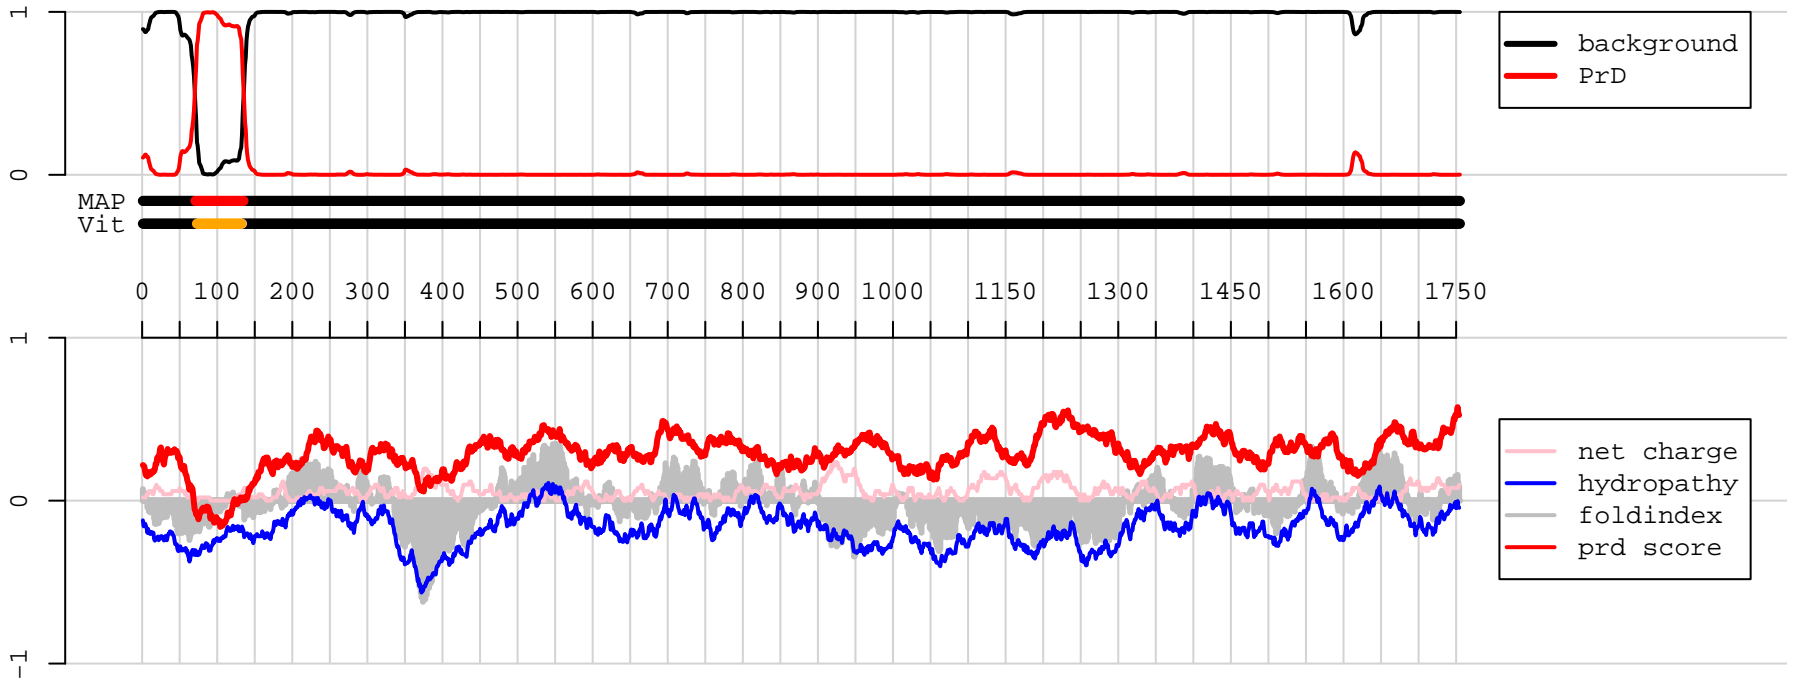

1 MESQQLSQHSPI SHGSACASVTSKEVHTNQDPLDVSASKTEECEKASTKANSQOTTTPASSAVPENPHHASPOTAOSHSPONGPYPOOCMMTONOANPSG  
 101 WSFYGHPSMIPYTPYQMSPMYFPPGPOSQFPOYPSSVGTPLSTPSPESGNTFTDSSSADSDMTSTKKYVRPPMLTSPNDFPNWVKTYIKFLQNSNLGGI  
 201 IPTVNGKPVQRITDDELTFLYNTFQIFAPSQFLPTWVKDILSVDYTDIMKILSKSIEKMQSDTQEANDIVTLANLQYNGSTPADAFETKVTNIIDRLNNN  
 301 GIHINNKVACQLIMRGLSGEYKFLRYTRHRHLNMTVAELFLDIHAIYEEQOQSRNSKPNYRRNP SDEKNDRSYTNNTTKPKVIARNPQKTNNSSKKTARA  
 401 HNVSTSNNSPSTDNDSISKSTTEPIQLNNKHDLHLGOKLTESTVNHTNHSDDDELPGHLLLDSGASRTLIRSAHHIHSASSNPDIINVDAQKRNIPIINAIG  
 501 DLQFHFQDNTKTSIKVLHTPNIAVDLLSLNELAAVDITACFTKNVLESDGTVLAPIVKYGDYFVWSKKYLLPSNISVPTINNVHTSESTRKYYPYFIHR  
 601 MLAHANAQTI RYSLKNNTITYFNESDWDSSAIDYQCPDCLIGKSTKHRHIKGSRLKYQNSYEPFOYLHTDIFGPVHNLPKSAPSYFISFTDETTKFRWV  
 701 YPLHDRREDSILDVFTTILAFIKNQFQASVLVIQMDRGSEYTNRTLHKFLEKNGITPCYTTTADSRAGVAERLNRTLDDCRTQLQCSGLPNHLWFSAI  
 801 EFSTIVRNSLASPKSKKSARQHAGLAGLDISTLLPFGQPVI VNDHNPNSKIHPRGIPGYALHPSRNSYGYIIYLP SLKKTVDTTNYVILQGESRLDQFN  
 901 YDALTFDEDLNRLTASYHSFIASNEIQESNDLNIESDHDFOQSDIELHPEQPRNVLSKAVSPTDSTPPSTHTEDSKRVSKTNIRAPREVDPNISESNILPS  
 1001 KKRSTPQISNIESTGSGGMHKLNVPL LAPMSQSNTHESHASKSKDFRHSDSYSENETNHTNVPISSTGGTNNKTVPQISDQETEKRIIHRSPSIDASP  
 1101 PENNSSHNIVPIKTPPTVSEQNTTEESIIADLPLPDLPPESPTEFPDPFKELPPINSHQTNSSLGGIGDSNAYTTINSKKRSLEDNETEIKVSRDWTWNTKN  
 1201 MRSLEPPRSKRIHLIAAVKAVKSIKPIRTTLRYDEAITYNKDIKEKEYIEAYHKEVNQLLKMNTWDTDKYYDRKEIDPKRVINSMFIFNKKRDGTHKA  
 1301 RFVARGDIQHPD TYDTGMQSN TVHHYALMTSLSLALDNNYYITQLDISSAYLYADIKEELYIRPPPHLGMNDKLI RLKKS HYGLKQSGANWYETIKSYLI  
 1401

# FIP1

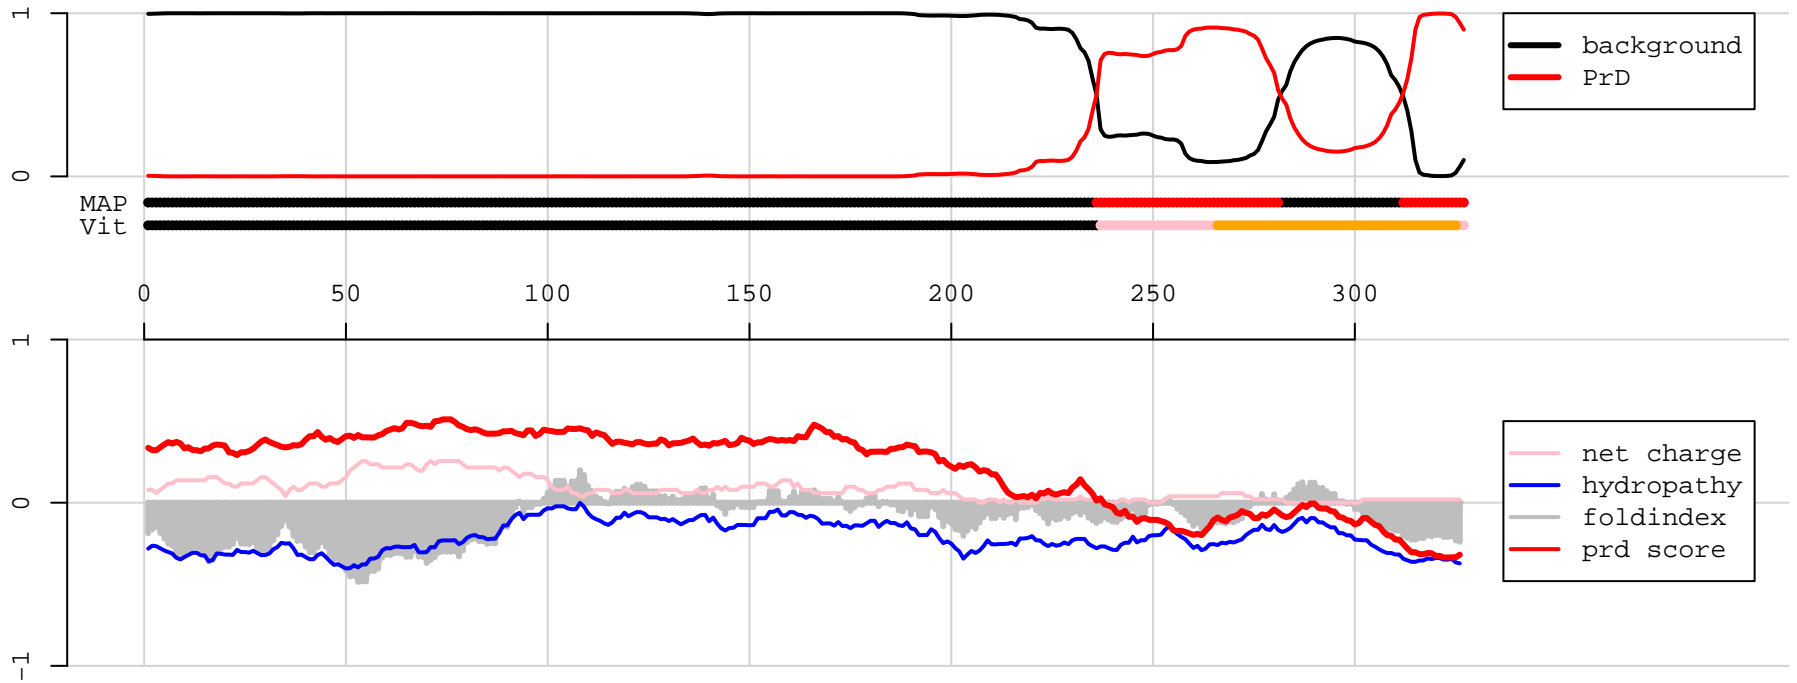

1 MSSSEDEDDKFLYGSDSELALPSSKRSRDDEADAGASSNPDIVKRQKFDSPVEETPATARDDRSDEDIYSDSSDDSDSDLEVIISLGPDPTRLDAKLLD  
 101 SYSTAATSSSKDVISVATDVSNTITKTSDERLITEGEANQGV TATTVKATESDGNVPKAMTGSIDLKKEGIFDSVGITTIDPEVLKEKPWRQPGANLSDY  
 201 FNYGFNEFTWMEYLHRQEKLQODYNPRRILMGLLSL QOOGKLN SANDTDSNLGNLIDNNNNVNNANMSNLNSNMGNMSMSGTPNPPAPPMPHPSFPPLPMFG  
 301 SFPPFPMPGMMPPMNOOPNONONONSK

# LGE1

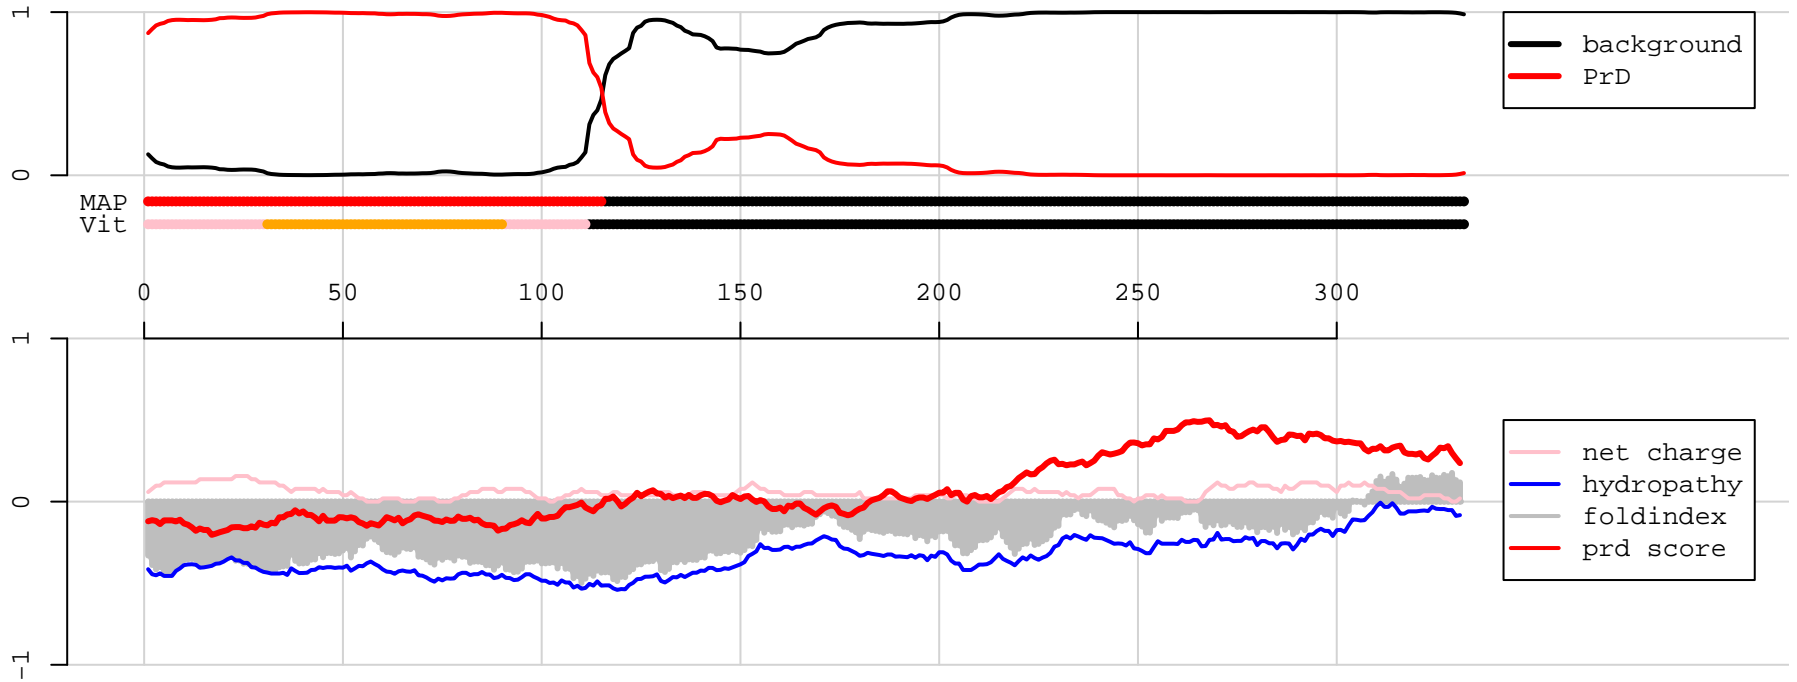

1 MSGYTGNNYSRYSSSTPPRORGGYHHARRSRGGAGGSYYRGGNASYGARYNSDYEOPPOEGDLROTGAYYRNGYTDTRPYYSANSRHYOAOPSPRYNNGTN  
 101 SYHL.PORGNSODTNGRTTASQEDNDEKRVKSRYRNMQADHPRQOPMSVGTSSRNGSSGNSSTSSTSNGLPPPPSVSSITNNRSYHSSAYPYSSHTYN  
 201 NYHHRETPPPPPSNGYYAKGYVHVPEENRSNSDGSSSSVVKKRILDMKDSPF IYLTDFDKNVKKTNNTESECEKAREVFKESDSIDSALEELNLKINSN  
 301 ELELRLNNQCCKHALNIQLTQEKLDSLLMQ

# YNL284C-A

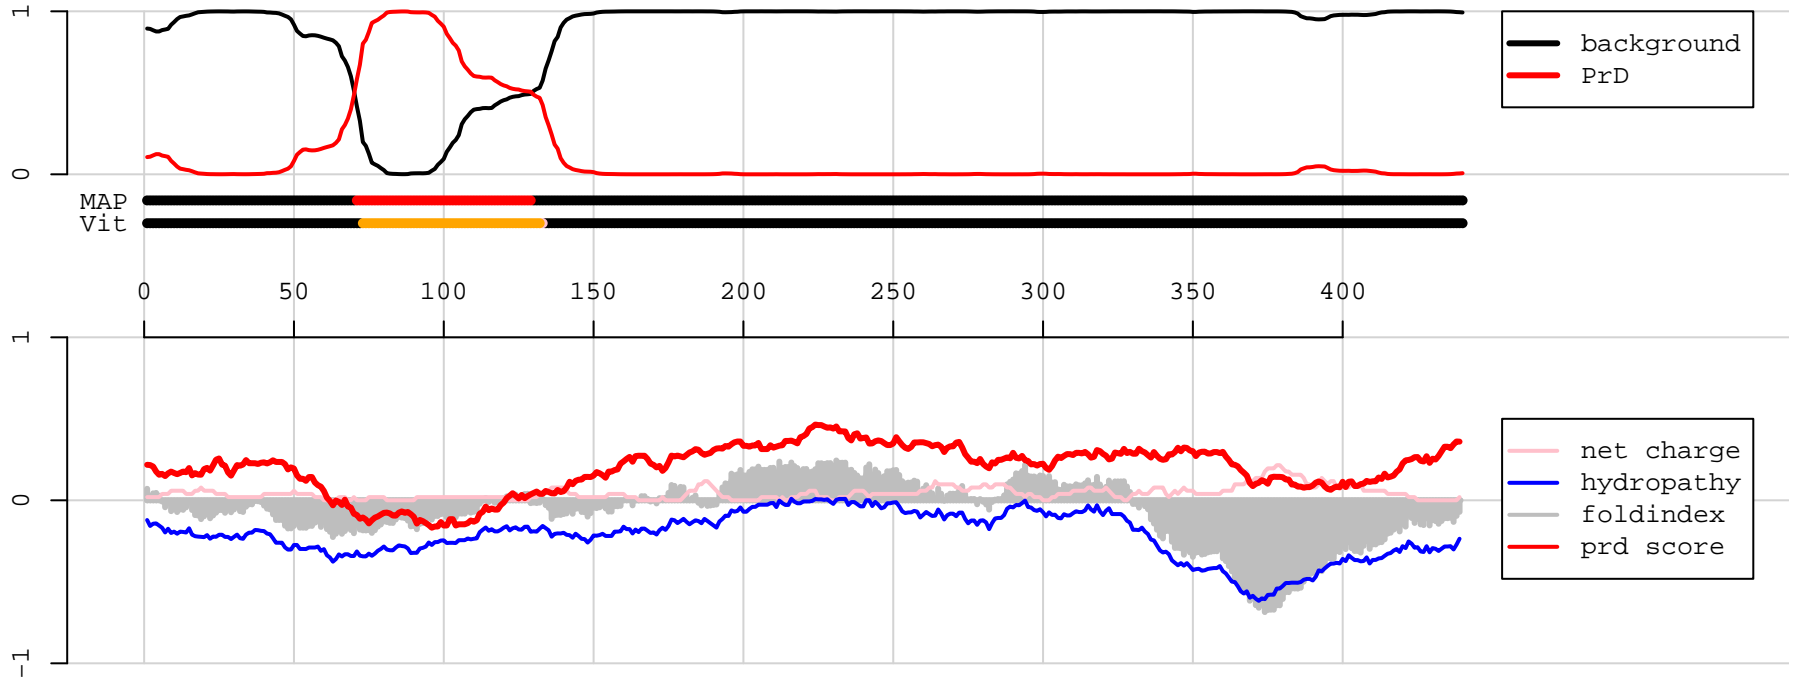

1 MESQQLSQHSPISHGSACASVTSKEVHTNQDPLDVSASKIQEYDKASTKANSQOTTPASSAVPENPHHASPOTAOSHSPONGPYOOOCMMTONOANPSG  
 101 WSFYGRPSMIPYTPYOMSPMYFPPGPHSQFPQYPSSVGTPLSTPSPESGNTFTDSSSADSDMTSTKKYVRPPMLTSPNDFLNWVKTYIKFLQNSNLGDI  
 201 IPTATRKAVRQMTDDELTFLLCHTFQLFAPSQFLPTWVKDILSADYTDIMKILSKSINKMQSDTQEVNDITTLATLHYNGSTPADAFEAEVTNILDRLNNN  
 301 GIPINNKVACQFIMRGLSGEYKFLRYARHRYIHMTVADLFSDIHSMYEEQOESKRNKSTYRRNPSDEKKDSRITYTNTTKPKSITRNSQKPNNSSQRTARA  
 401 HNVSTSNSSGPDNDLIRGSTTEPIQLKNKHDLHLRPGTY

YNL284C-B

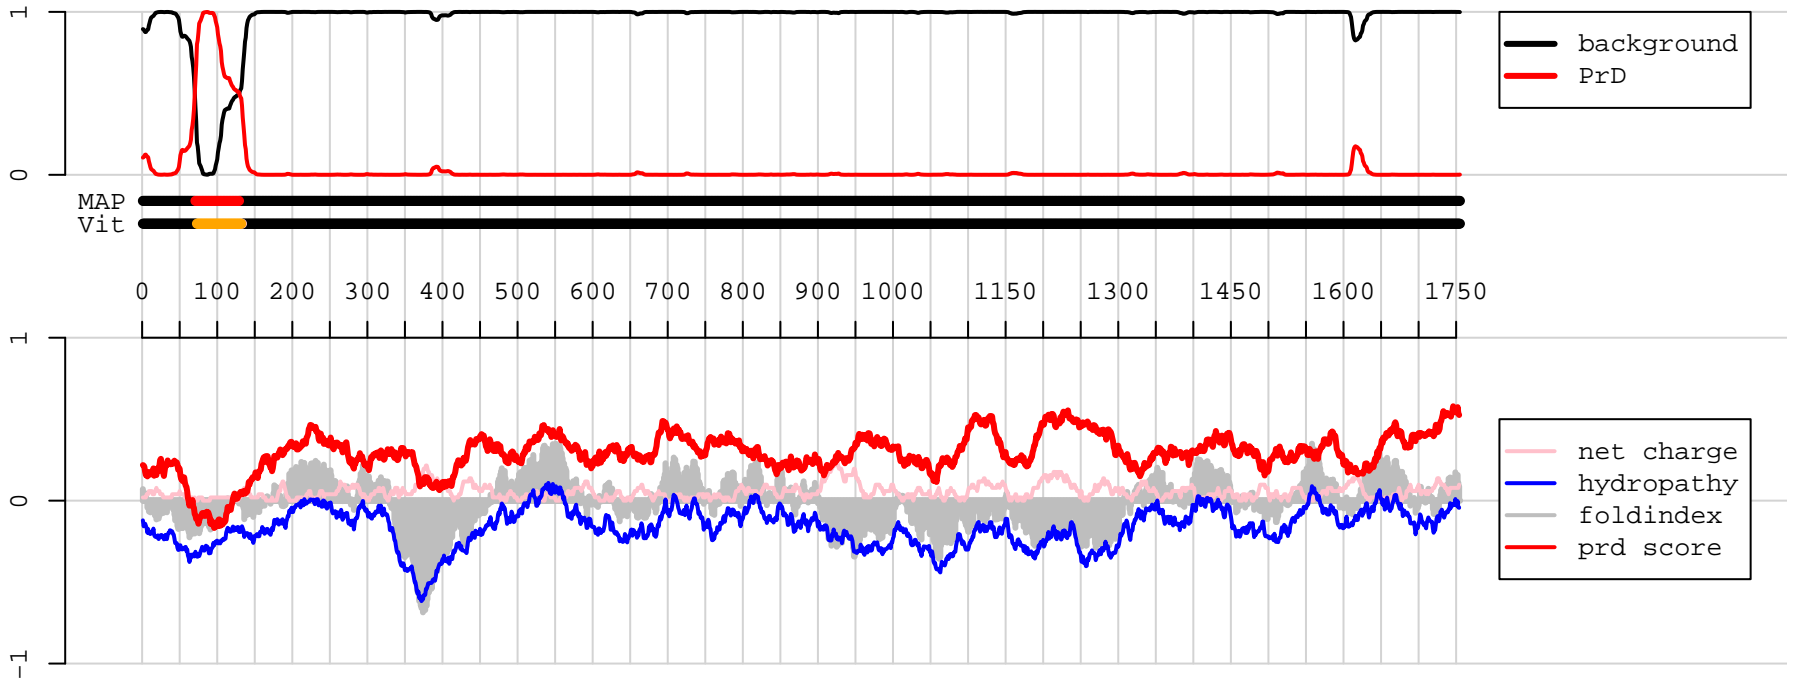

1 MESQQLSQHSPISHGSACASVTSKEVHTNQDPLDVSASKIQEYDKASTKANSQOTTPASSAVPENPHHASPOTAOSHSPONGPYOOOCMMTONOANPSG  
 101 WSFYGRPSMIPYTPYQMSPMYFPPGPHSQFPQY PSSVGTPLSTPSPESGNTFTDSSSADSDMTSTKKYVRPPMLTSPNDFLNWVKTYIKFLQNSNLGDI  
 201 IPTATRKAVRQMTDDELTFLCHTFQLFAPSQFLPTWVKDILSADYTDIMKILSKSINKMQSDTQEVNDITTLATLHYNGSTPADAFEAEVTNILDRLNNN  
 301 GIPINNKVACQFIMRGLSGEYKFLRYARHRYIHMTVADLFSDIHSMYEEQOESKRNKSTYRRNPSDEKKDSRTYTNTTKPKSITRNSQKPNNSSQRTARA  
 401 HNVSTSNSSGPDNDLIRGSTTEPIQLKNKHDLHLGOELTESTVNHTNHSDDDELPGHLLLDSGASRTLIRSAHHIHSASSNPGINNVDAQKRNIPIINAIG  
 501 DLQFHFQDNTKTSIKVLHTPNIAYDLLSLNELAAVDITACFTKNVLSRSDGTVLAPIVKYGDYFVWSKKYLLPSNISVPTINNVTSESTRKYPPYFIHR  
 601 MLAHANAQTI RYSLKNNTITYFNESDWDSSAIDYQCPDCLIGKSTKHRHIKGSRLKYQNSYEPFOYLHTDIFGPVHNLPKSAPSYFISFTDETTKFRWV  
 701 YPLHDRREDSILDVFTTILAFIKNQFQASVLVIQMDRGSEYTNRTLHKFLEKNGITPCYTTTADSRAGVAERLNRTLDDCRTQLQCSGLPNHLWFSAI  
 801 EFSTIVRNSLASPKSKKSARQHAGLAGLDISTLLPFGQPVI VNDHNPNSKIHPRGIPGYALHPSRNSYGYIIYLP SLKKTVDTTNYVILQGESRLDQFN  
 901 YDALTFDEDLNRLTASYQSF IASNEIQOSDDLNI ESDHDFQSDIELHPEQPRNVLSKAVSPTDSTPPSTHTEDSKRVSKTNIRAPREVPDNIKSNILPS  
 1001 KKRSTPQISDIESTGSGGMHRLDVPLLAPMSQYNTHESSTSKSKDFRHSDSYSDNETNHTNVPISSTGGTNNKTVPQOTSEQETEKRIIHRSPSIDTSS  
 1101 SESNSLHHVVP IKTSDTCPKENTEESI IADLPLPDLPEPPTKLSDSFKELPPINSRQTNSSLGGIGDSNAYTTINSKKRSLEDNETEIKVSRDWTWNTKN  
 1201 MRSLEPPRSKKRIHLIAAVKAVKSIKPIRTTLRYDEAITYNKDIKEKEYIEAYHKEVNQLLKMKTWDTD RYYDRKEIDPKRVINSMFIFNRKRDGTHKA  
 1301 RFVARGDIQHPD TYDSGMQSN TVHHYALMTSLSLALDNNYYITQLDISSAYLYADIKEELYIRPPPHLGMNDKLI RLLKKSlyGLKQSGANWYETIKSYLI



# GAR1

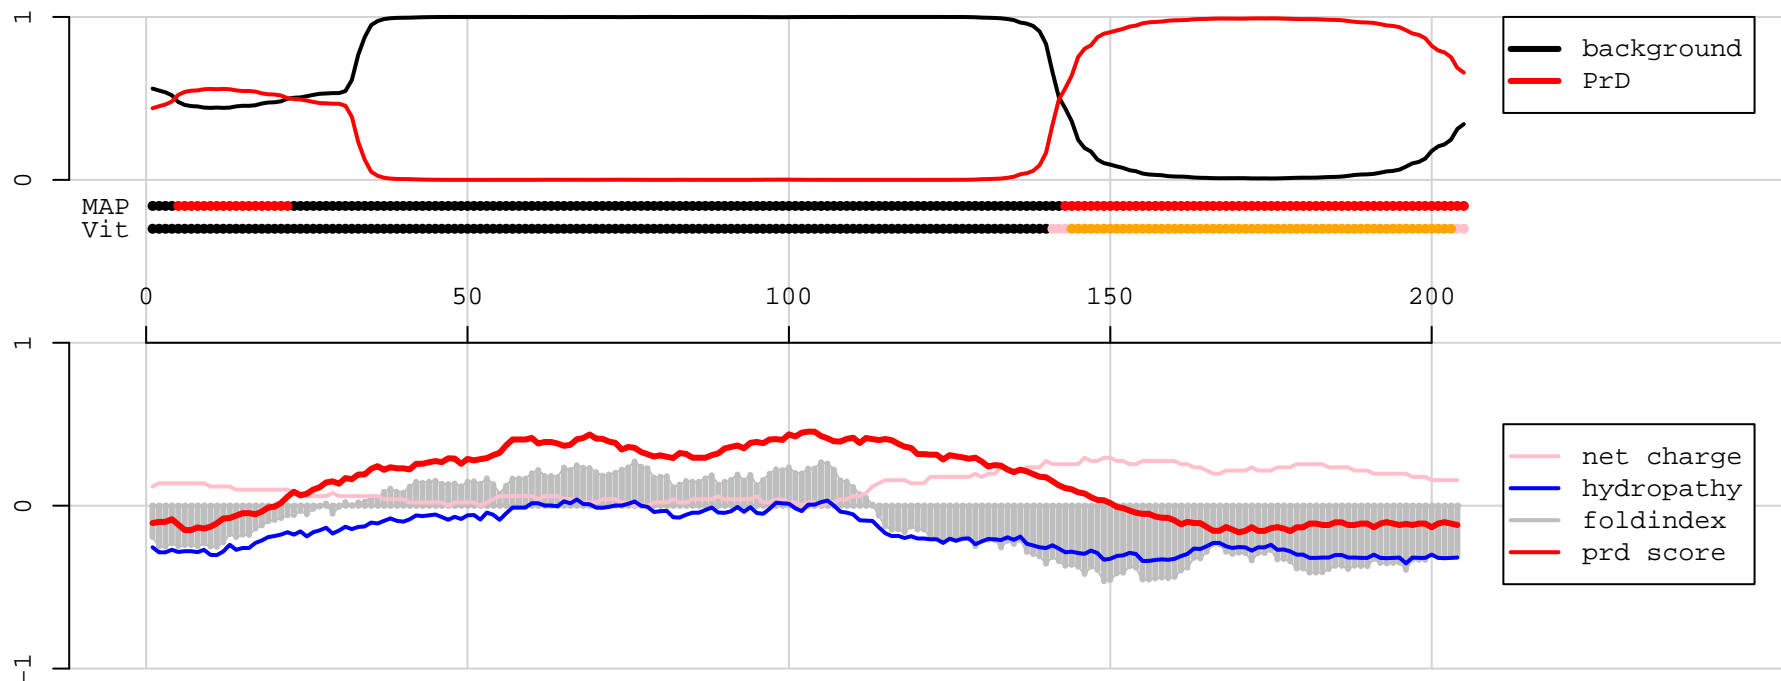

1 MSFRGGNRGGRGGFRGGFRGGRTGSARSFQQGPPDTVLEMGAFLHPCEGDIVCRSINTKIPYFNAPIYLENKTQVGKVDEILGPLNEVFFTIKCGDGVQA  
 101 TSFKEGDKFYIAADKLLPIERFLPKPKVVGPPKPKNKKRSGAPGGRGGASMRGGSRRGGFRGGRRGSSFRGGRGGSSFRGGSRRGGSFRGGSRRGGSRRGGF  
 201 RGRR

# VPS60

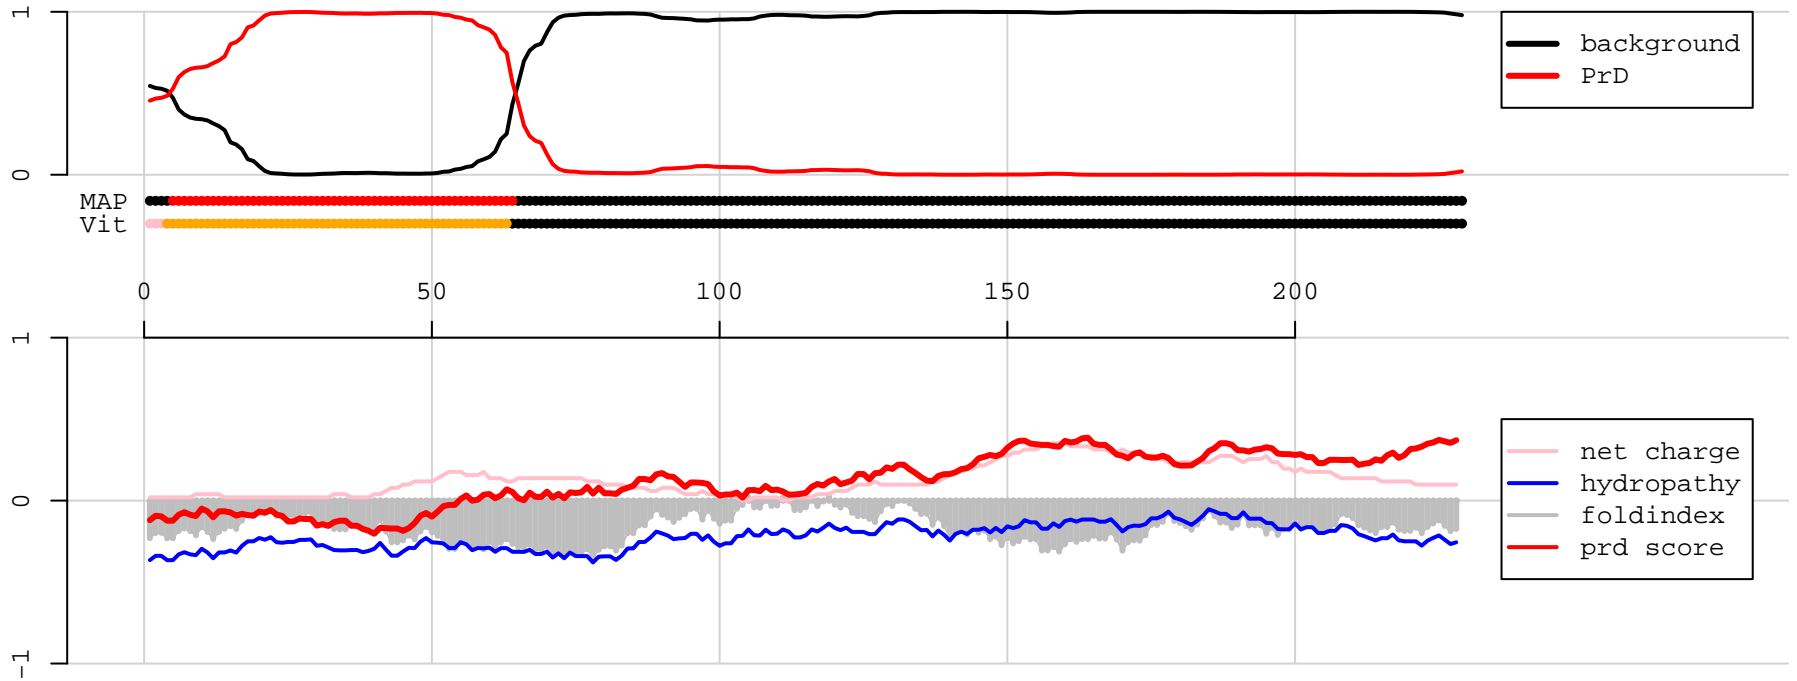

1 MNRIFGYGNKKSHDOLLOESNOSMNOAOOSLSNRISOLDTQIAOLNFOLONIOKNLORSNNKOPSLRKQALKILNKRKQLENMKDSLDSQSWMTQAQLT  
 101 NDNLQNTMITINALKQTNNAMKAQYGKINIDKLQDMQDEMLDLIEQGDELQEVLAMNNNSGELDDISDAELDAELDALAQEDFTLPTSENSLGNDMPSYL  
 201 LGANAPPAFIDEEPNLDTEDKNKALESAQ

# SGV1

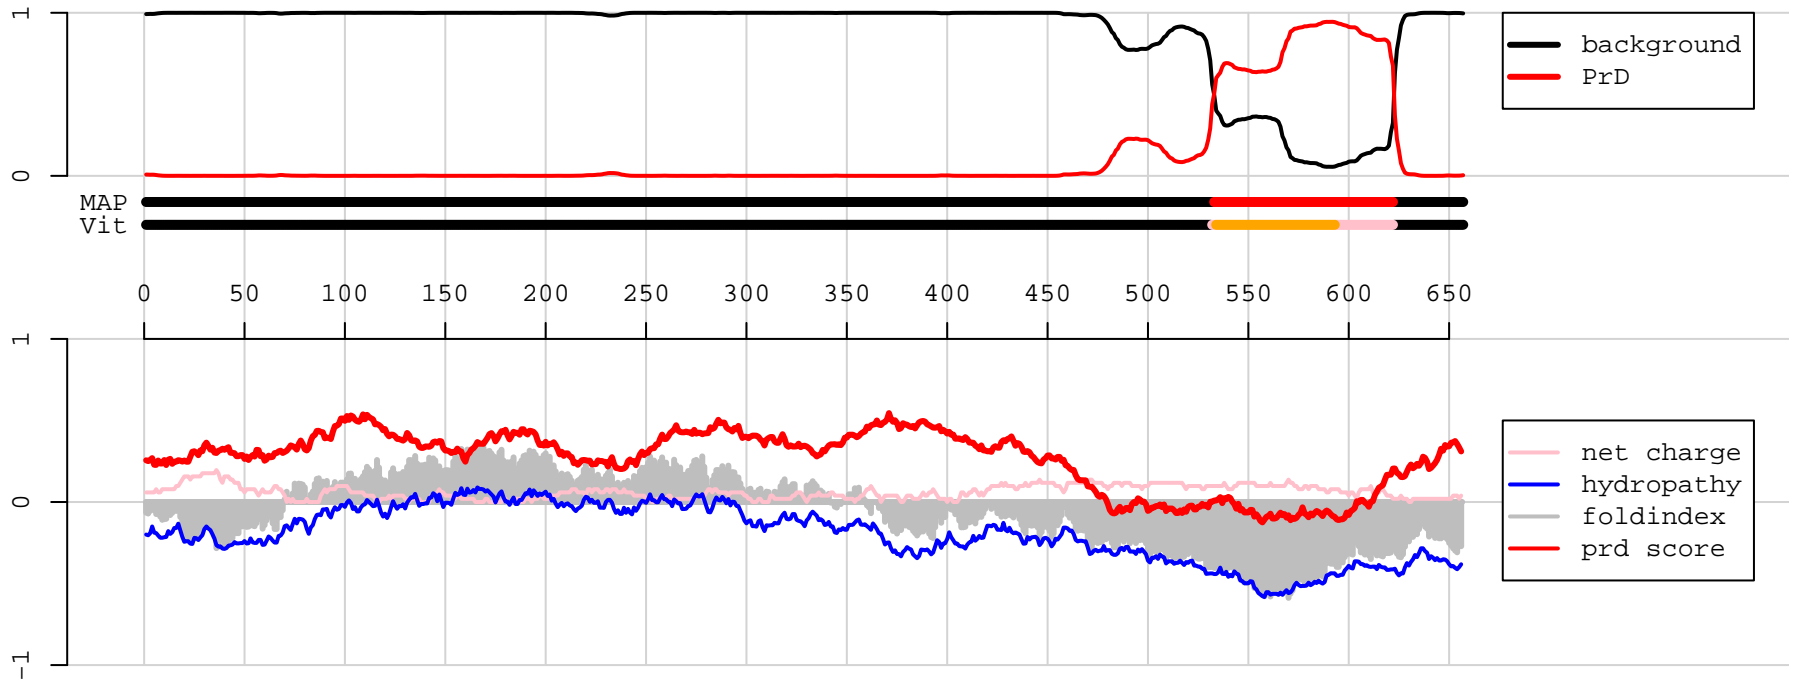

```

1  MSDNGSPAVLPKTEFNKYKIGKVKSTPAIQORDAKTNLTYIKLRKRSSEKVGCTVFNHYREDEKLGQGTGFEVYKGIHLETQRQVAMKKIIVSVEKDLF
101 PITAQREITILKRLNHKNIKLIEMVYDHSPDITNAASSNLHKSFYMILPYMVADLSGVLHNPRINLEMCDIKNMLQILEGLNYIHCAKFMHRDIKTAN
201 ILIDHNGVLKLAADFGLARLYYGCPPNLKYPGGAGSGAKYTSVVVTRWYRAPELVLDGKQYTTAVDIWVGCVFAEFFEKKPILQGKTDIDQGHVIFKLLG
301 TPTEEDWAVARYLPGAELTTTNYKPTLRERFGKYLSETGLDFLGQLLALDPYKRLTAMSAKHHWPFKEDPLPSEKITLPTESHEADIKRYKEEMHQSL
401 QRVPTAPRGHIVEKGESPVVKNLGAIPRGPKDDASFLPSSKNVLAKPPPSKIRELHQNRPYPYHVNSGYAKTAIPPPAAPAGVNRYPNNSSRNNRFSGN
501 STAPNNSRNPVNRFPETNVSSKYNKVPLPLGPOSRYOGNSNESRYKNSPNDSTRYHNPRYVVKPETNFNROPOKYSROESNAPINKNYNPSNGSRNMAGD
601 HHQGSRPSHPQFPISPSOGQHOLTSKPIEKKNGSFKDERAKPDESKEFQNSDIADLY
  
```

# DBP1

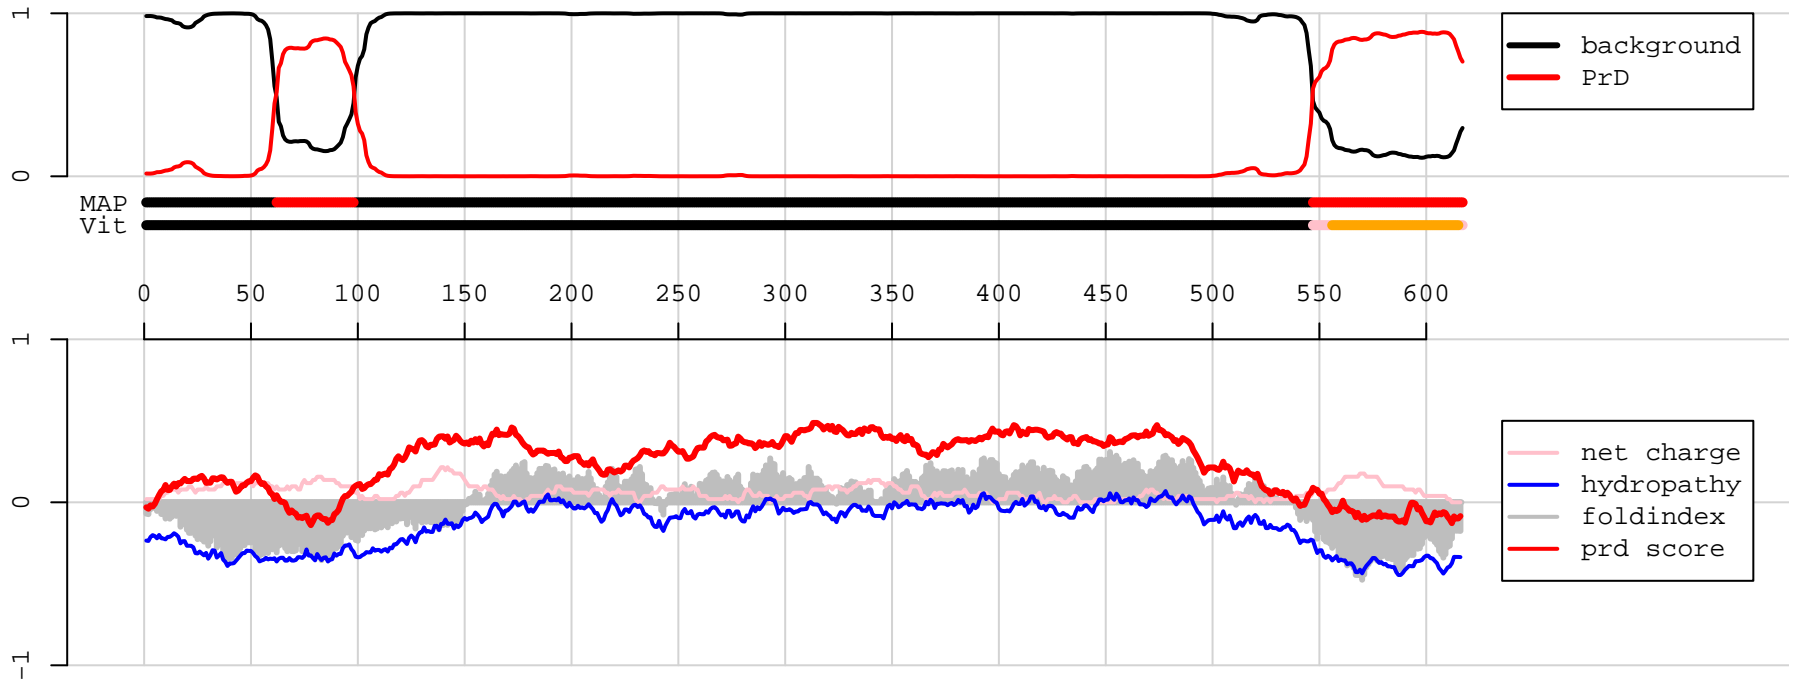

1 MADLPQKVSNLSINNKENGGGGKSSYVPPHLRSRGKPSFERSTPKQEDKVTGGDFRRAGRQTGNNGGFFGF**SKERN**GGTSANYNRGSSNYKSSGNRW  
 101 VNGKHIPGPKNAKLEAELFGVHDDPDYHSSGIKFDNYDNI PVDASGKDVEPEILDFSSPPLDELLMENIKLASFTKPTPVQKYSIPIVTKGRDLMACAQT  
 201 GSGKTGGFLFPLFTELFRRSGPSVPEKAQSFYSRKGYP SALVLAPTRELATQIFEEARKFTYRSWVRPCVVYGGAPIGNQMREVDRCDLLVATPGRLND  
 301 LLERGKVS LANIKYLVLDEADRMLDMGFEPQIRHIVEECMP SVENRQTLMFSAFPVDIQHLARDFLDNYIFLSVGRVGTSENITQRILYVDDMDKKS  
 401 ALLDLLSAEHKGLTLIFVETKRMADQLTDFLIMQNFKATAIHGDRTQAERERALSFAKANVADILVATAVAARGLDIPNVTHVINYDLP SDIDDYVHRIG  
 501 RTGRAGNTGVATSF FNSNNQNI VKGLMEILNEANQEVPTFLSDLSR ONS**SRGGRT**RG**GGGGFF**NS**SRNNGSR**DYR**KHGGNGS**SFG**STR**PRNTGT**SNWGS**I**GGGF**  
 601 RNDNEKNGYGNSNASSWW

YBL005W-A

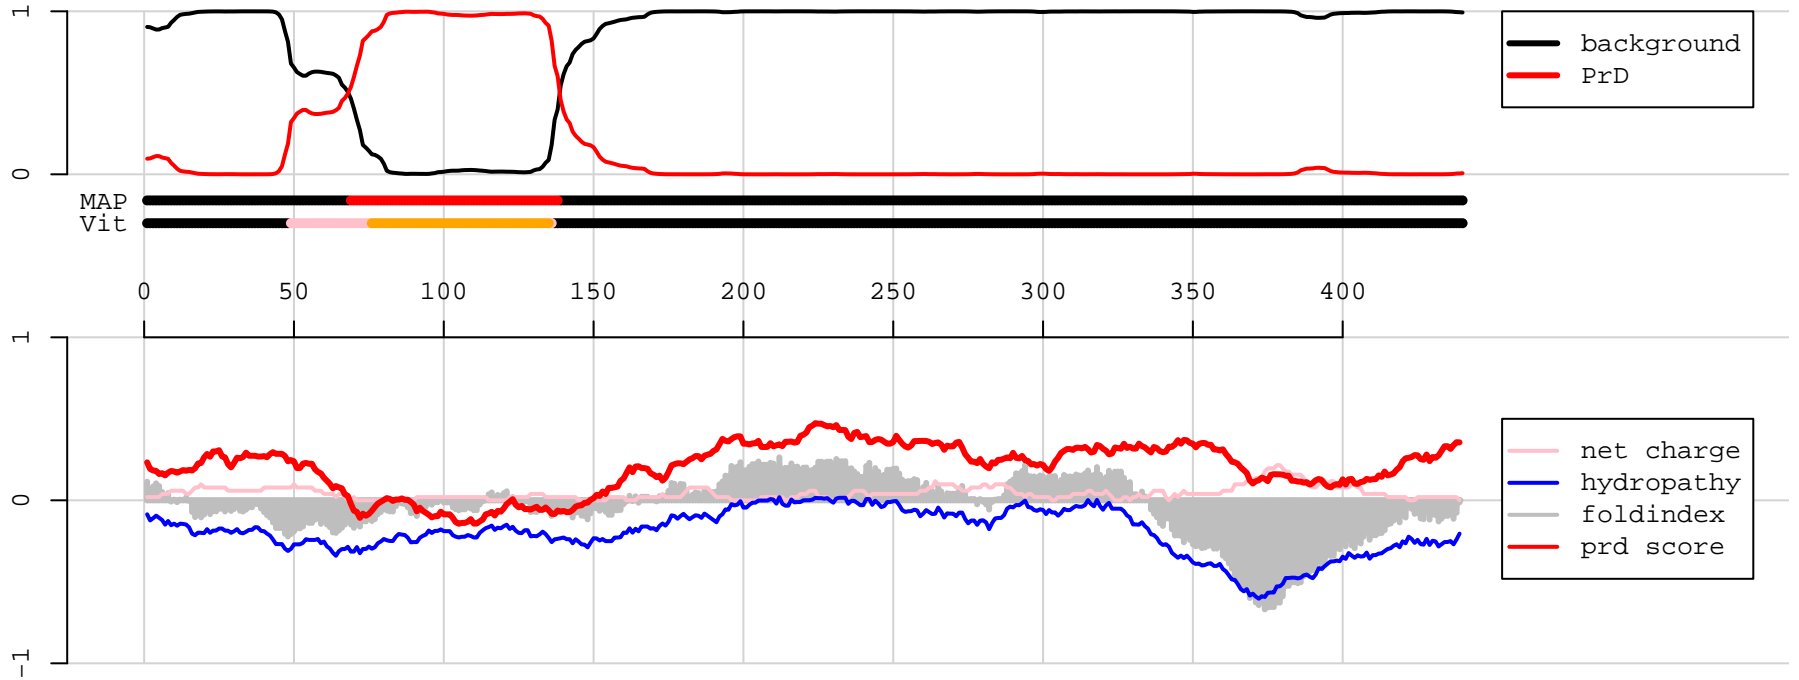

1 MESQQLSQHSPIFHGSACASVTSKEVQTTQDPLDISASKTEECEKVSTOANSOOPTTPSSAVPENHHHASPOAAOVPLPONGPYPOORMMNTQOANISG  
 101 WPVYGHPSLMPYPPYQMSPMYAPPGAOSQFTOYPOYVGTHLNTSPESGNSFPDSSSAKSNMTSTNQHVRPPPILTSPNDFLNWVKIYIKFLQNSNLGDI  
 201 IPTATRKAVRQMTDDELTFQLCHTFQLFAPSQFLPPWVKDILSVDYTDIMKILSKSINKMQSDTQEVNDITTLATLHYNGSTPADAFEAEVTNILDRLNNN  
 301 GIPINNKVACQFIMRGLSGEYKFLPYARHRCIHMTVADLFSDIHSMYEEQESKRNKSTYRRSPSDEKKDSRTYTNTTKPKSITRNSQKPNNSSQRTARA  
 401 HNVSTFNNSPGPDNDLIRGSTTEPIQLKNTHDLHLRPGTY

YBL005W-B

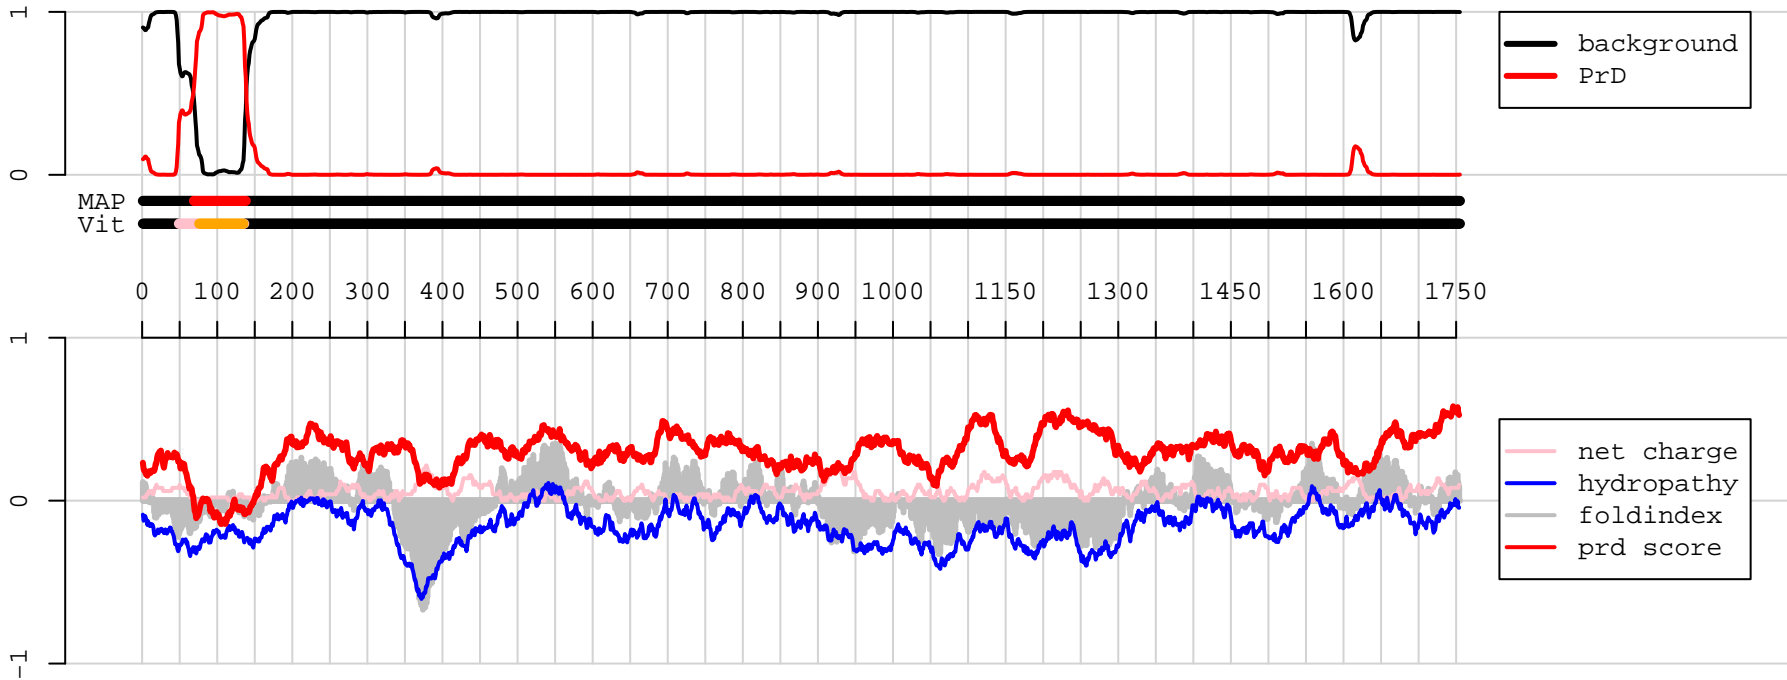

1 MESQQLSQHSPIFHGSACASVTSKEVQTTQDPLDISASKTEECEKVSTOANSOOPTTPSSAVPENHHHASPOAAOVPLPONGPYPOORMMNTQOANISG  
 101 WPVYGHPSLMPYPPYQMSPMYAPPGAOSQFTQYPOYVGTHLNTSPESPESGNSFPDSSSAKSNMTSTNQHVRRPPPILTSPNDFLNWVKIYIKFLQNSNLGDI  
 201 IPTATRKAVRQMTDDELTFQLCHTFQLFAPSQFLPPWVKDILSVDYTDIMKILSKSINKMQSDTQEVNDITTLATLHYNGSTPADAFEAEVTNILDRLNNN  
 301 GIPINNKVACQFIMRGLSGEYKFLPYARHRCIHMTVADLFSDIHSMYEEQOESKRNKSTYRRSPSDEKKDSRTYTNTTKPKSITRNSQKPNNSSQRTARA  
 401 HNVSTFNNSPGPDNDLIRGSTTEPIQLKNTHDLHLGOELTESTVNHTNHSDDDELPGHLLLDSGASRTLIRSAHHIHSASSNPDINVVDAQKRNIPIINAIG  
 501 DLQFHFQDNTKTSIKVLHTPNIAVDLLSLNELAAVDITACFTKNVLESDGTVLAPIVKYGDYFVWSKKYLLPSNISVPTINNVHTSESTRKYYPYFIHR  
 601 MLAHANAQTIRYSLKNNTITYFNESDWDSSAIDYQCPDCLIGKSTKHRHIKGSRLKYQNSYEPFOYLHTDIFGPVHNLPKSAPSYFISFTDETTKFRWV  
 701 YPLHDRREDSILDVFTTILAFIKNQFQASVLVIQMDRGSEYTNRTLHKFLEKNGITPCYTTTADSRAGVAERLNRTLDDCRTQLQCSGLPNHLWFSAI  
 801 EFSTIVRNSLASPKSKKSARQHAGLAGLDISTLLPFGQPVIIVNDHNPNSKIHPRGIPGYALHPSRNSYGYIIYLP SLKKTVDTTNYVILQGESRLDQFN  
 901 YDALTFDEDLNRLTASYQSFIA SNEIQOSNDLNIESDHDFO SDIELYEQPRNVLSKAVSPTDSTPPSTHTEDSKRVSKTNIRAPREVDPNISESNILPS  
 1001 KKRSTPQIISDIESTDSGGMHRLDVPLLAPMSQSNTHESYASKSKDFRHSDSYSDNETNHTNVPISSTGGTNNKTVPQOTSEQETEKRIIHRSPSIDTSS  
 1101 SESNSLHHVVPIKTSDTCPKENTEESI IADLPLPDLPEPPELSDSFKELPPINSRQTNSLGGIGDSNAYTTINSKKRSLEDNETEIKVSRDWTWNTKN  
 1201 MRSLEPPRSKKRIHLIAAVKAVKSIKPIRTTLRYDEAITYNKDIKEKEYIEAYHKEVNQLLKMKTWTDKYYDRKEIDPKRVINSMFIFNRKRDGTHKA  
 1301 RFVARGDIQHPD TYDSGMQSN TVHHYALMTSLSLALDNNYHITQLDISSAYLYADIKEELYIRPPPHLGMNDKLI RLKKS LYLKQSGANWYETIKSYLI

# YMR045C

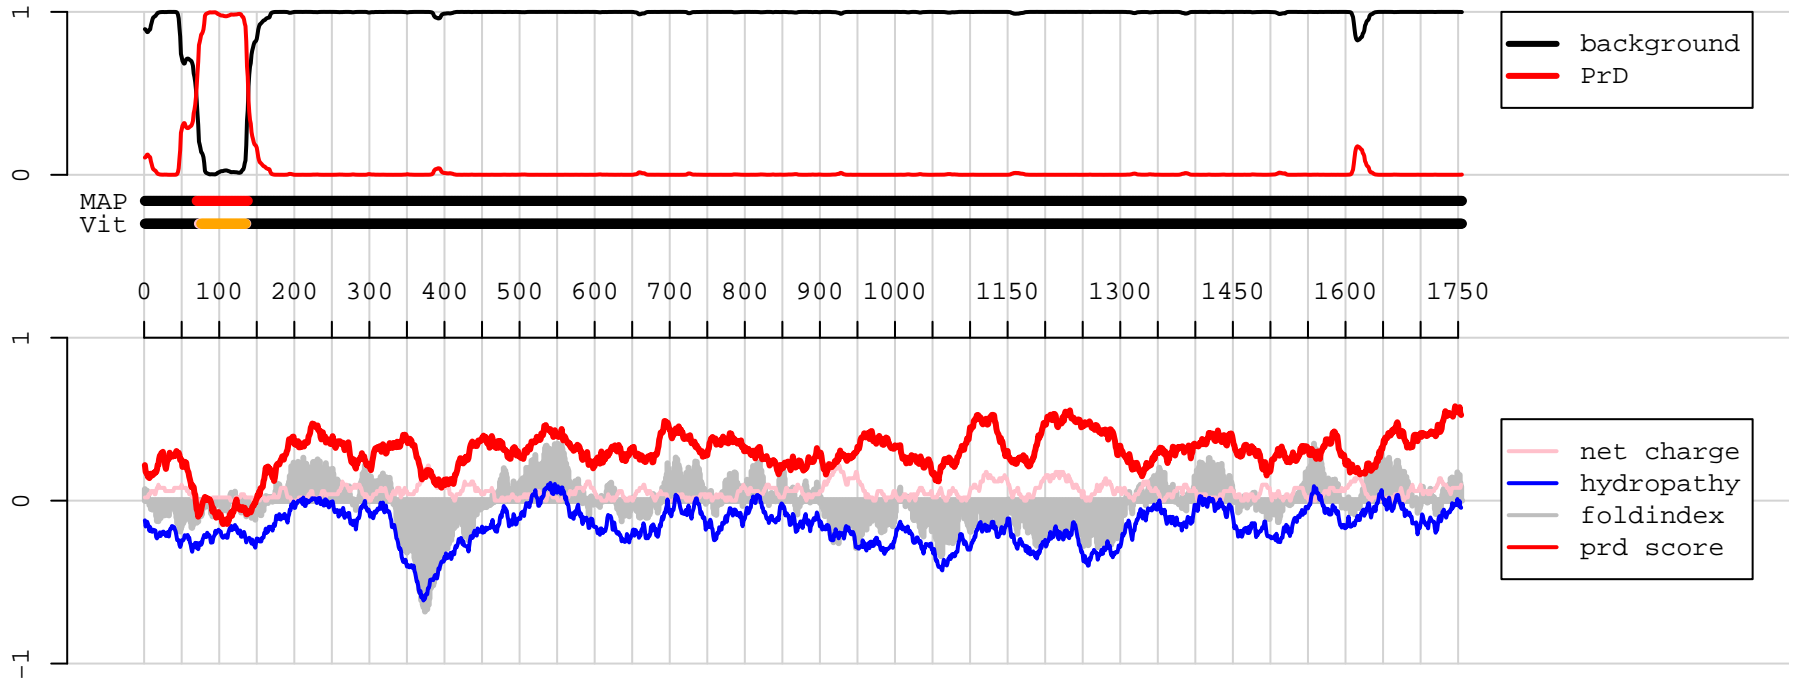

1 MESQQLSQHSPI SHGSACASVTSKEVQTTQDPLDI SASKTEECEKVSTQANSQOPTTPLSSAVPENHHASP **QAAOVPLPONGPYPOORMMNTQOANISG**  
 101 **WPVYGHPSLMPYPPYQMSPMYAPPGAOSQFTOYPOYVGTHLNTSPESGNSFPDSSSAKSNMTSTNQHVRRPPPI LTSPNDFLNWVKIYIKFLQNSNLGDI**  
 201 IPTATRKAVRQMTDDELTF LCHTFQLFAPSQFLPPWKDILSVDYTDIMKILSKSINKMQSDTQEVNDITTLATLHYNGSTPADAFEAEVTNILDRLNNN  
 301 GIPINNKVACQFIMRGLSGEYKFLRYARHRCIHMTVADLFSDIHSMYEEQOESKRNKSTHRRSPSDEKKDSRTYTNTTKPKSITRNSQKPNNSSQRTARA  
 401 HNVSTFNNSPGPDNDLIRGSTTEPIQLKNTHDLHLGOELTESTVNHTNHSDDKLPGHLLLDSGASRTLIRSAHHIHSASSNPDINVVDAQKRNIPIINAIG  
 501 DLQFHFQDNTKTSIKVLHTPNIAVDLLSLNELAAVDITACFTKNVLSRSDGTVLAPIVKYGDYFVWSKKYLLPSNISVPTINNVHTSESTRKYPPYPIHR  
 601 MLAHANAQTI RYSLKNNTITYFNESDWDSSAIDYQCPDCLIGKSTKHRHIKGSRLKYQNSYEPFOYLHTDIFGPVHNLPKSAPSIFYISFTDETTKFRWV  
 701 YPLHDRREDSILDVFTTILAFIKNQFQASVLVIQMDRGSEYTNRTLHKFLEKNGITPCYTTTADSRAGVAERLNRTLDDCRTQLQCSGLPNHLWFSAI  
 801 EFSTIVRNSLASPKSKKSARQHAGLAGLDISTLLPFGQPVI VNDHNPNSKIHPRGIPGYALHPSRNSYGYIIYLP SLKKTVDTTNYVILQGESRLDQFN  
 901 YDALTFDEDLNRLTASYHSFIASNEIQOSNDLNIESDHDFOSDIELHPEQLRNVLSKAVSPTDSTPPSTHTEDSKRVSKTNIRAPREVPDNI SESNILPS  
 1001 KKRSTPQISDIESTGSGGMHRLDVPLLAPMSQSNTHESHASKSKDFRHSDSYSDNETNHTNVPISSTGGTNNKTVPQOTSEQETEKRIIHRSPSIDTSS  
 1101 SESNSLHHVVP IKTSDTCPKENTEESI IADLPLPDLPEPPELSDSFKELPPINSRQTNSSLGGIGDSNAYTTINSKKRSLEDNETEIKVSRDWTWNTKN  
 1201 MRSLEPPRSKKRIHLIAAVKAVKSIKPIRTTLRYDEAITYNKDIKEKEYIEAYHKEVNQLLKMKTWTDTKYYDRKEIDPKRVINSMFIFNRKRDGTHKA  
 1301 RFVARGDIQHPD TYDSGMQSN TVHHYALMTSLSLALDNNYYITQLDISSAYLYADIKEELYIRPPPHLGMNDKLI RLKKS LYLGLKQSGANWYETIKSYLI  
 1401

# YMR046C

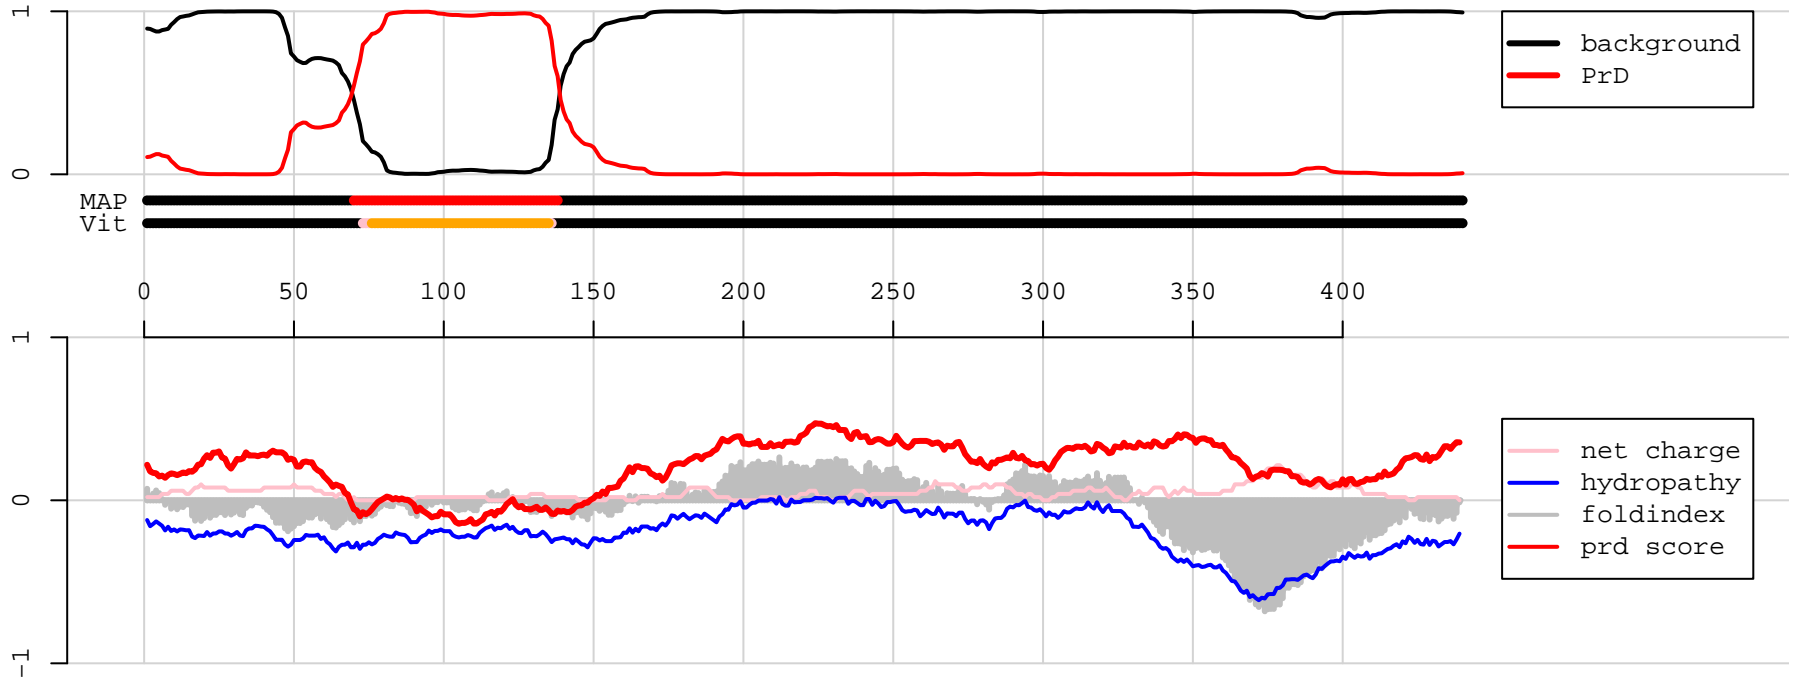

1 MESQQLSQHSPISHGSACASVTSKEVQTTQDPLDISASKTEECEKVSTQANSQOPTTPLSSAVPENHHASPOAAOVPLPONGPYPOORMMNTQOANISG  
 101 WPVYGHPSLMPYPPYQMSPMYAPPGAOSQFTOYPOYVGTHLNTSPESGNSFPDSSSAKSNMTSTNQHVRRPPPILTSPNDFLNWVKIYIKFLQNSNLGDI  
 201 IPTATRKAVRQMTDDELTFLLCHTFQLFAPSQFLPPWVKDILSVDYTDIMKILSKSINKMQSDTQEVNDITTLATLHYNGSTPADAFEAEVTNILDRLNNN  
 301 GIPINNKVACQFIMRGLSGEYKFLRYARHRCIHMTVADLFSDIHSMYEEQOESKRNKSTHRRSPSDEKKDSRTYTNTTKPKSITRNSQKPNNSSQRTARA  
 401 HNVSTFNNSPGPDNDLIRGSTTEPIQLKNTHDLHLRPGTY



# HLJ1

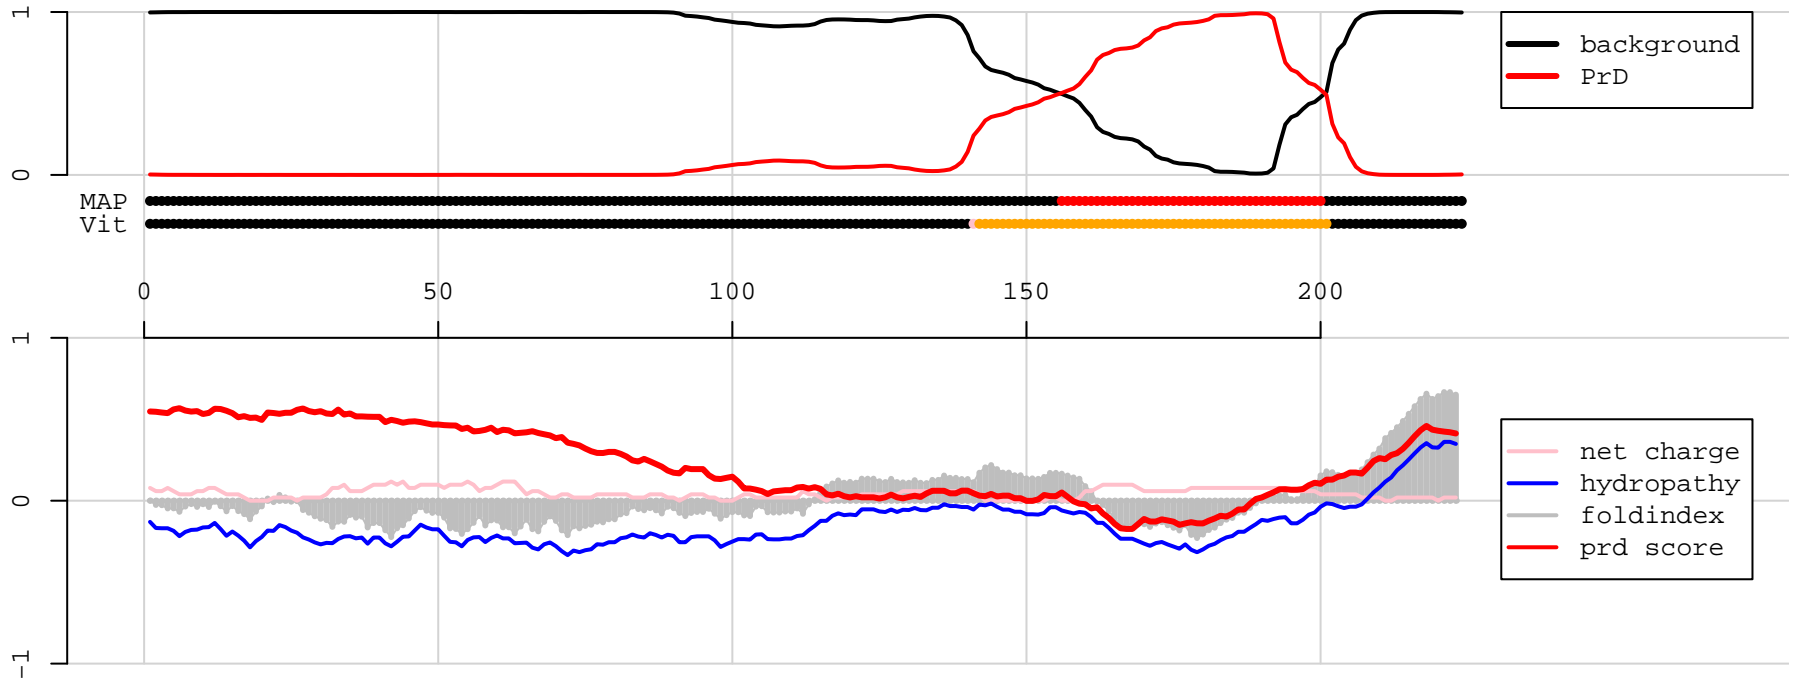

1 MSFTEDQEKIALEILSKDKHEFYEILKVDRKATDSEIKKAYRKLAIKLHPDKNSHPKAGEAFKVINRAFEVLSNEEKRSIYDRIGRDPDDRQMPSRGAAS  
 101 GFRGSAGGSPMGGGFEDMFFNSRFGGQRAGPPEDIFDFLFNAGGSPFGASPFGPSASTFSFGGGGGFRVYTNNRGGSPFMROQPRSRQQQQAEENAVNS  
 201 QLKNMLVLFIIIFIVLPMIKDYLF

# PEX5

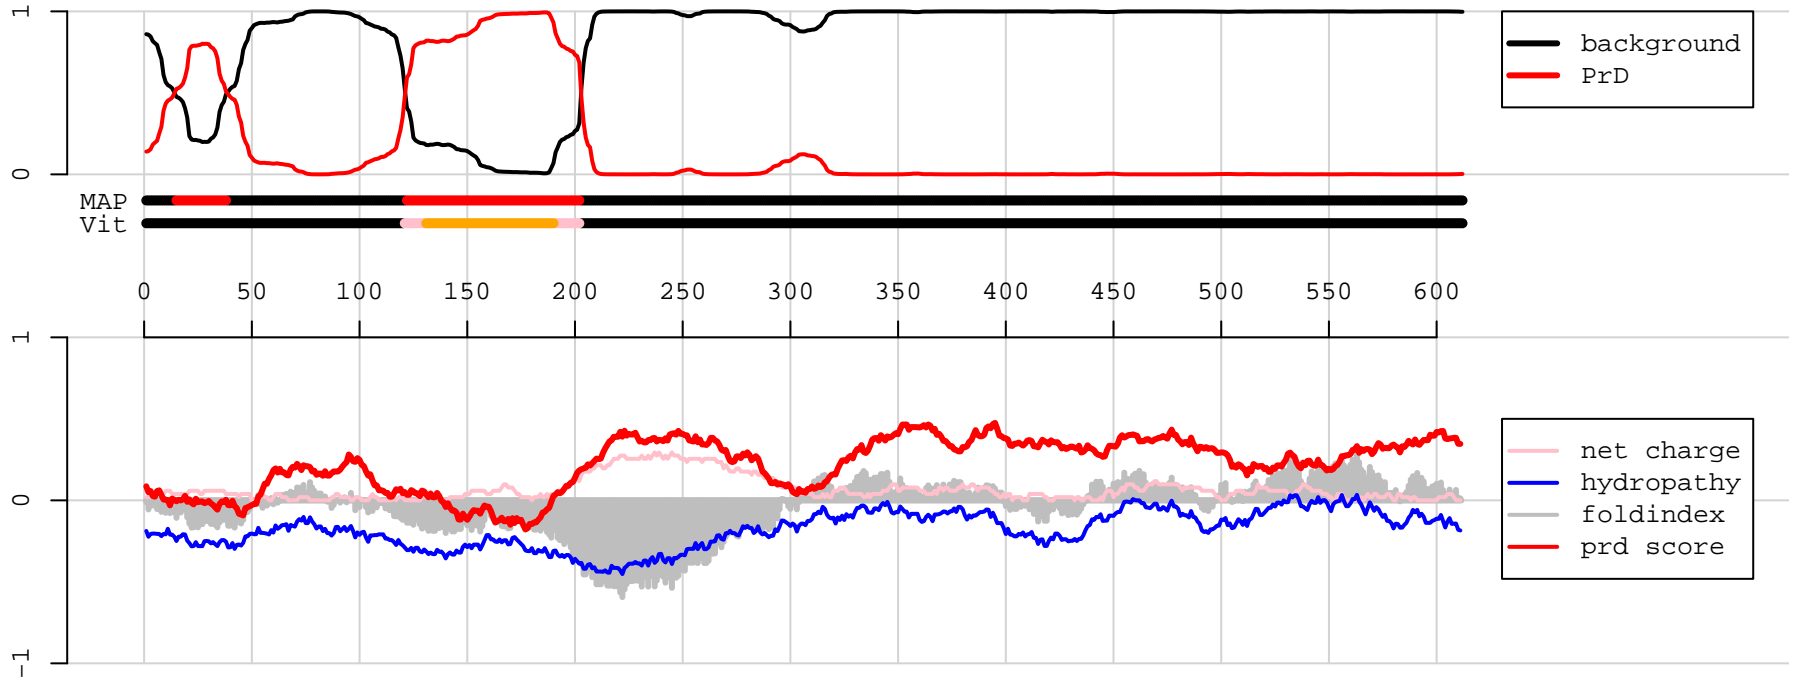

1 MDVGSCSVGNPLAQLHKHTQONKSLQFNOKNNGRLNESPLQGTNPKGISEAFISNVNAISQENMANMQRFINGEPLIDDKRMEIGPSSGRLPPFSNVH  
 101 SLQTSANPTQIKGVNDISHWSEFFOGSNSIQNRNADTGNSEKAWORGSTTASSRFOYPNTMMNNYAYASMNSLSGSRLOSPAFMNOQOSGRSKEGVNEQE  
 201 QQPWTDQFEKLEKEVSENLDINDEIEKEENVSEVEQNKPETVEKEEGVYGDOYQSDFOEVWDSIHKDAEEVLPSELVNDLNLGEDYLKYLGGVRVNGNIE  
 301 YAFQSNNEYFNPNAYKIGCLLMENGAKLSEAALAFEA AVKEKPDHVDLRLGLVQTQNEKELNGISALEECLKLDPKNLEAMKTLAISYINEGYDMSA  
 401 FTMLDKWAETKYPEIWSRIKQODDKFQKEKGFTHIDMNAHITKQFLQLANNLSTIDPEIQCLGLLFYTKDDFDKTIDCFESALRVNPNDELMMNRLGAS  
 501 LANSNRSEEAIQAYHRALQLKPSFVRARYNLAVSSMNI GCFKEAAGYLLSVLSMHEVNTNNKKG DVGSLNNTYNDTVIETLKR VFIAMNRD DLLQEVKPG  
 601 MDLKRFKGEFSF

## MUM2

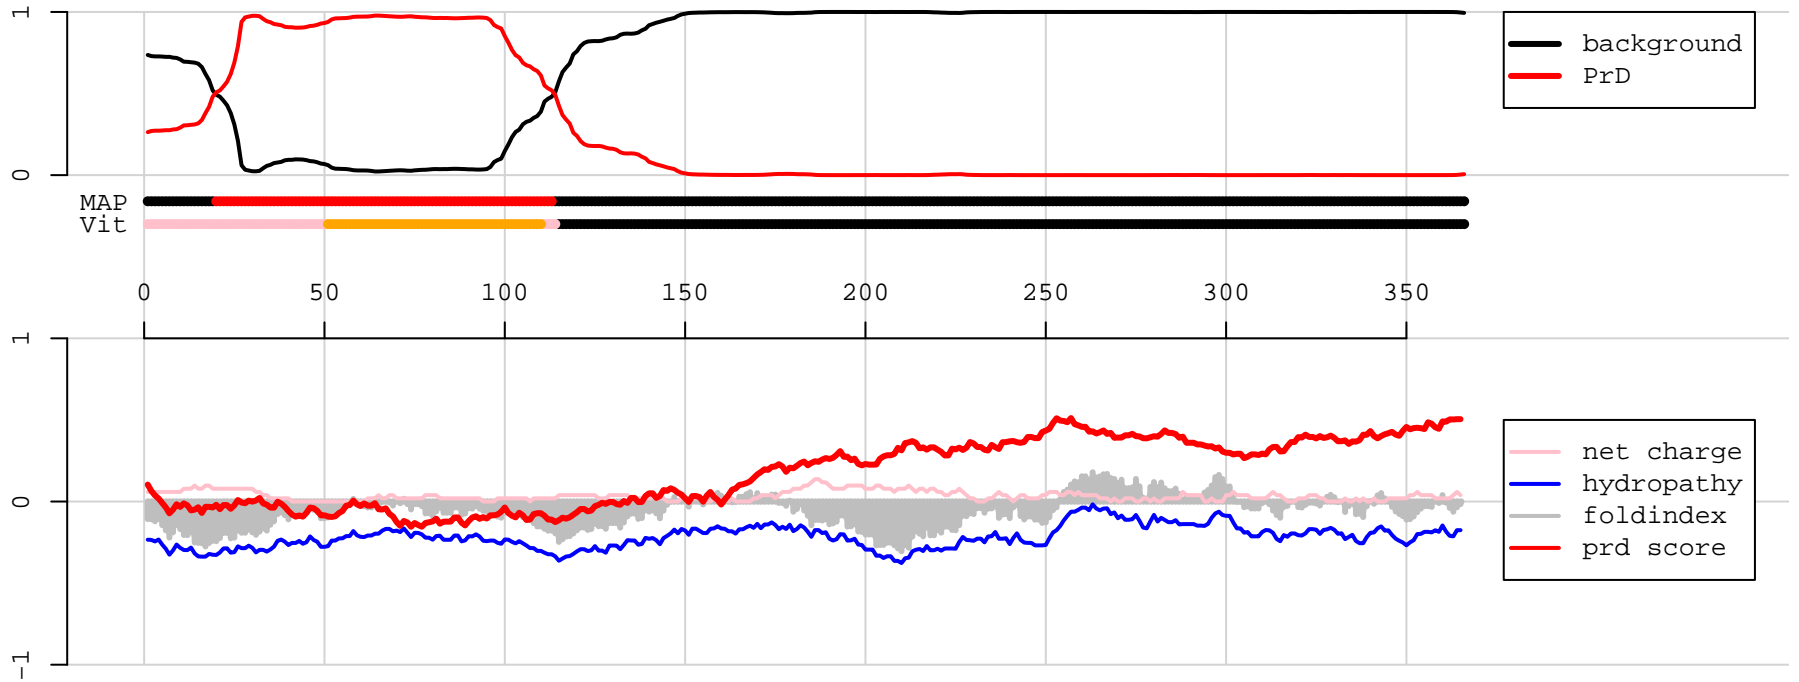

1 MNYMAYDYDPOHSLETSFNNLAFHPHOOSOOQALYESGERNDARPGLMNTLGOASKMNNSMLPOGSSASPLTGOHSLNSTTNFNMPPSMNTYNYQNVPOA  
 101 SMRNTLNHNNIMNGATANDYWLDPMNNMTNNKDTNGNPNDSMSSMSNMTAKTSINSTAFKNSFVPFNHVTALSMNNVNSNEMNSNKDDRMEALEVELQIK  
 201 ESQIESLENEIQRLKKIFNEGLNYKQNEHKYEKENCHIPOTFELPASLEVIFRKLSSSLHAKEKELAETKENLESILTALALNPTNSVTKYGRYDAESIA  
 301 HKMVVRLENLTNENKEMAKMLAYGRSKETQIELQLAKKENLELEREKIASLEAHLASKESSKEDVAN

# CHS1

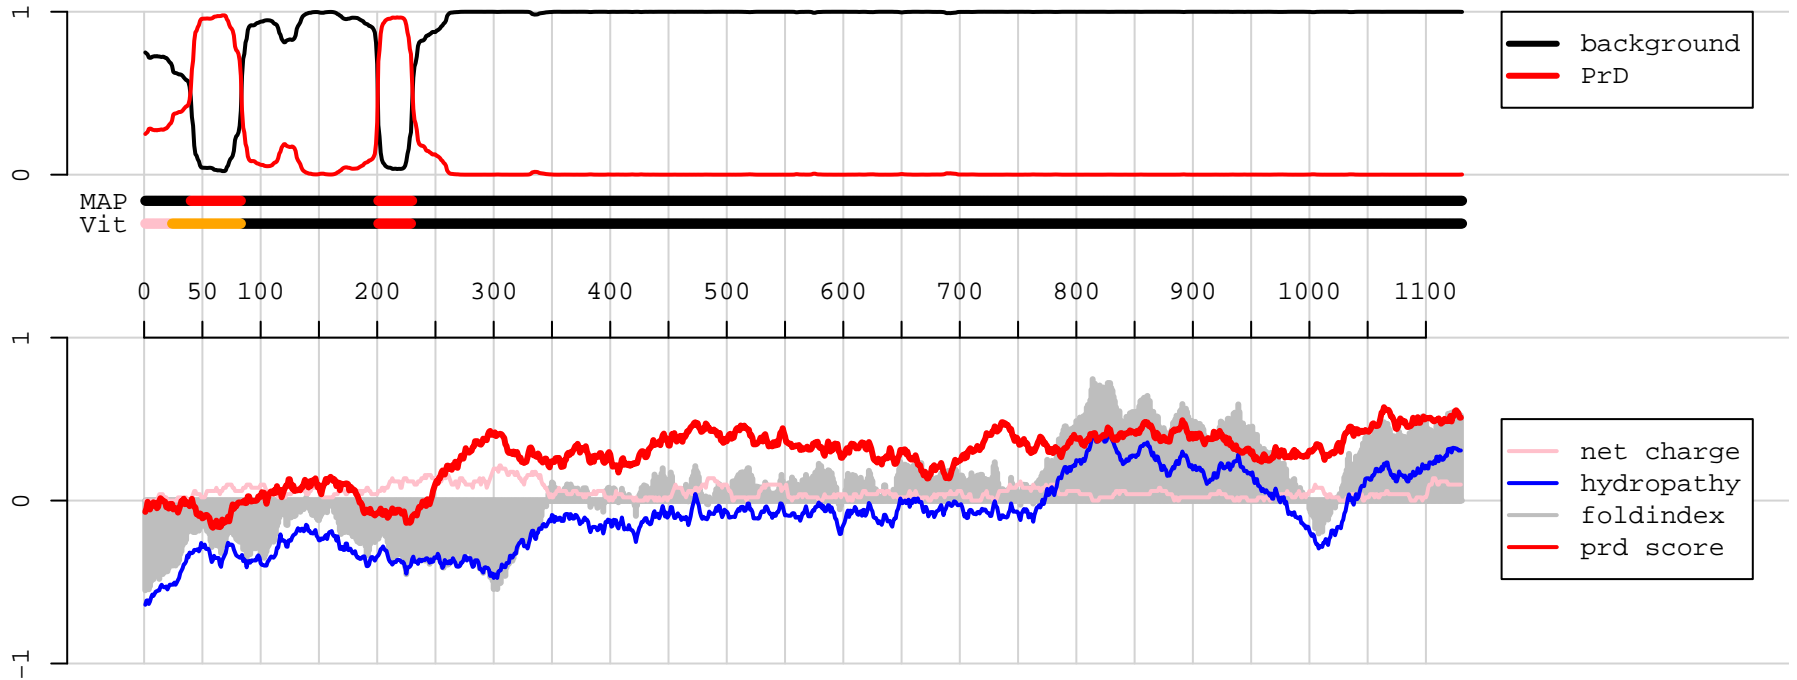

1 MSDONNRSRNEYHSNRKNEPSYELONAHSGLFHSSNEELTNRNORYTNONASMGSFTPVOSLOFPEOSOOTNMLYNGDDGNNNTINDNERDIYGGFVNHH  
 101 RORPPPATAEYNDVFNTNSQLPSEHOYNNVPSYPLPSINVIOTTPELIHNGSOTMATPIERPFFNENDYYNNRNSRTSPSIASSDGYADOEARPILE  
 201 QPNNNMNSGNIPOYHDQPFGYNNGYHGLQAKDYYDDPEGGYIDORGDDYOINSYLGRNGEMVDPYDENSLRHMTPMERREYLHDSRPVNDGKEELDSV  
 301 KSGYSHRDLGEYDKDDFSRDDEYDDLNTIDKLOFQANGVPASSVSSIGSKESDIIVSNDNLTANRALKRSGTEIRKFKLWNGNFVDSPISKTLLDQYA  
 401 TTTENANTLPNEFKFMRYQAVTCEPNQLAEKNFTVRQLKYLTPRETELMLVVTMYNEDHILLGRTLKGIMDNVKYMVKKNSTWGPDAWKIVVCIISD  
 501 GRSKINERSLLLSSLGCYQDGFAKDEINEKKVAMHVYEHTTMINITNISESEVSLECNQGTVPIQLLFCLKEQNQKINSHRWAFEGFAELLRPNIVTL  
 601 LDAGTMPGKDSIYQLWREFRNPNVGGACGEIRTDLGKRFVKLLNPLVASQNFEYKMSNILDKTTESNFGFITVLPGAFSAYRFEAVRGQPLQYFYGEIM  
 701 ENEGFHFFSSNMYLAEDRILCFEVVTKKNCNWILKYCRSSYASTDVPERVPEFILQRRRWLNGSFFASVSFCHFYRVWSSGHNIGRKLLLTVEFFYLFF  
 801 NTLISWFSLSSFLFFRILTVSIALAYHSAFNVLSVIFLWLYGICTLSTFILSLGNKPKSTEKFYVLTCVIFAVMMIYMIFCSIFMSVKSFQNILKNDTI  
 901 SFEGLITTEAFRDIVISLGSTYCLYLISSIIYLQPWHMLTSFIQYILLSPSYINVLNIYAFCNVHDLSWGTKGAMANPLGKINTTEDGTFKMEVLSSSE  
 1001 IQANYDKYLKVLNDFDPKSESRPTESYDEKKTGYANVRSLVIIFWVITNFIIVAVVLETGGIADYIAMKSISTDDTLETAKKAEIPLMTSKASIYFNV  
 1101 ILWLVASALIRFIGSIYMIVRFFKVTFR

# HSP42

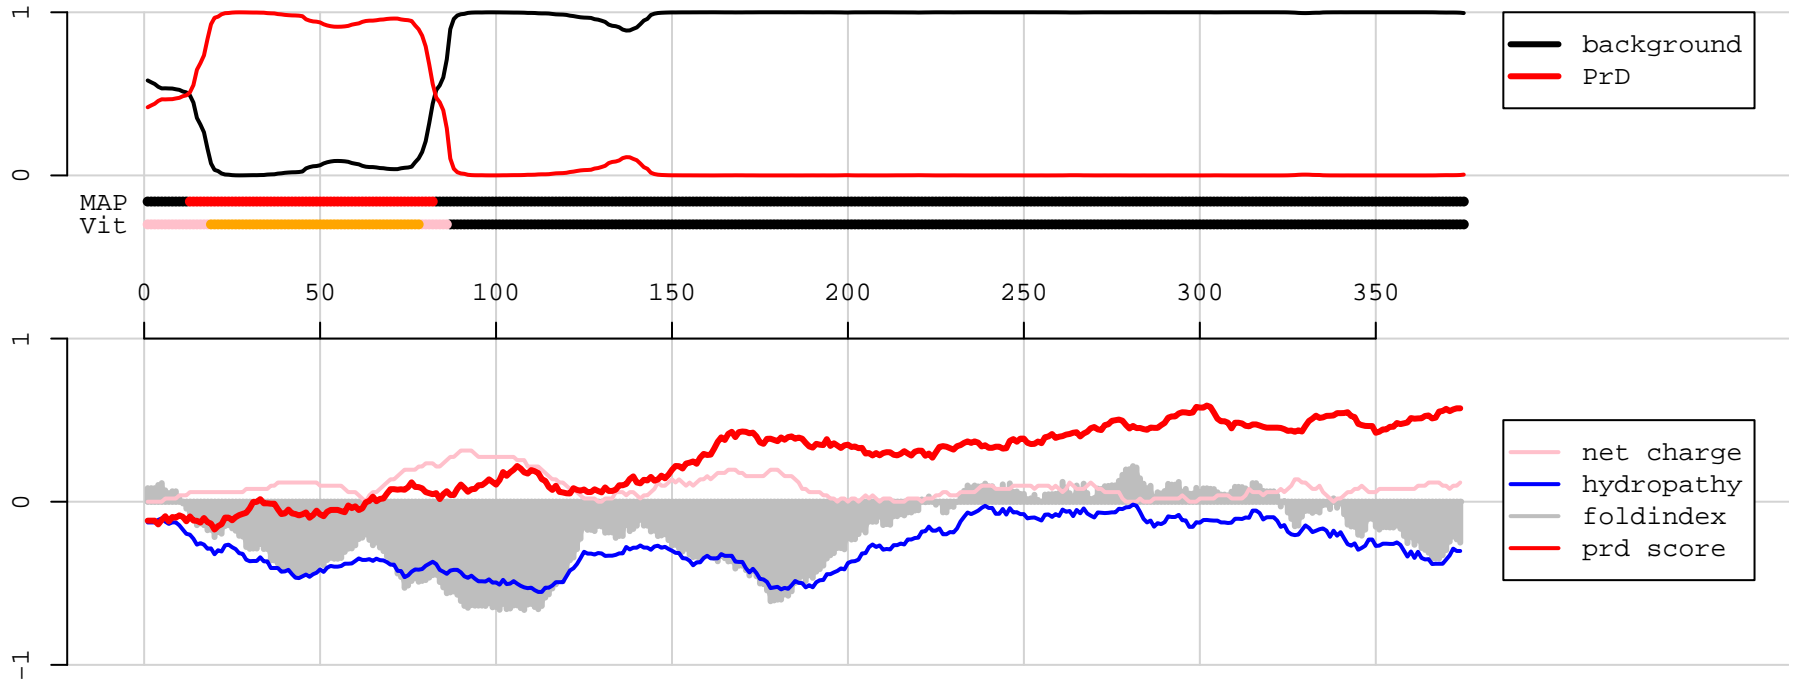

1 MSFYOPSLSLYDVLNALSNOTGORGGOOGYPORPORPORYHPHYGOVHVGGHHPRHHPLYSRYNGVPNTYYYQFPGQAYYYSPEYGYDDEDGEEEDQDEDM  
 101 VGDSGTTRQEDGGEDSNSRRYPSYHCNTARNRNTNQANSLNDLLTALIGVPPYEGTEPEIEANTEQEGEKGEEKDKKDKSEAPKEEAGETNKEKPLNQ  
 201 LEESRPPLAKKSSSFAHLQAPSPIPDPLQVSKPETRMDLFPSPENVYDTEPTYVVVLALPGANSRAFHIDYHPSSHEMLIKGKIEDRVGIDEKFLKIT  
 301 ELKYGAFERTVKFPVLPRIKDEEIKATYNNGLLQIKVPKIVNDTEKPKPKKRIAIEEIPDEELEFEENPNPTVEN

# SFP1

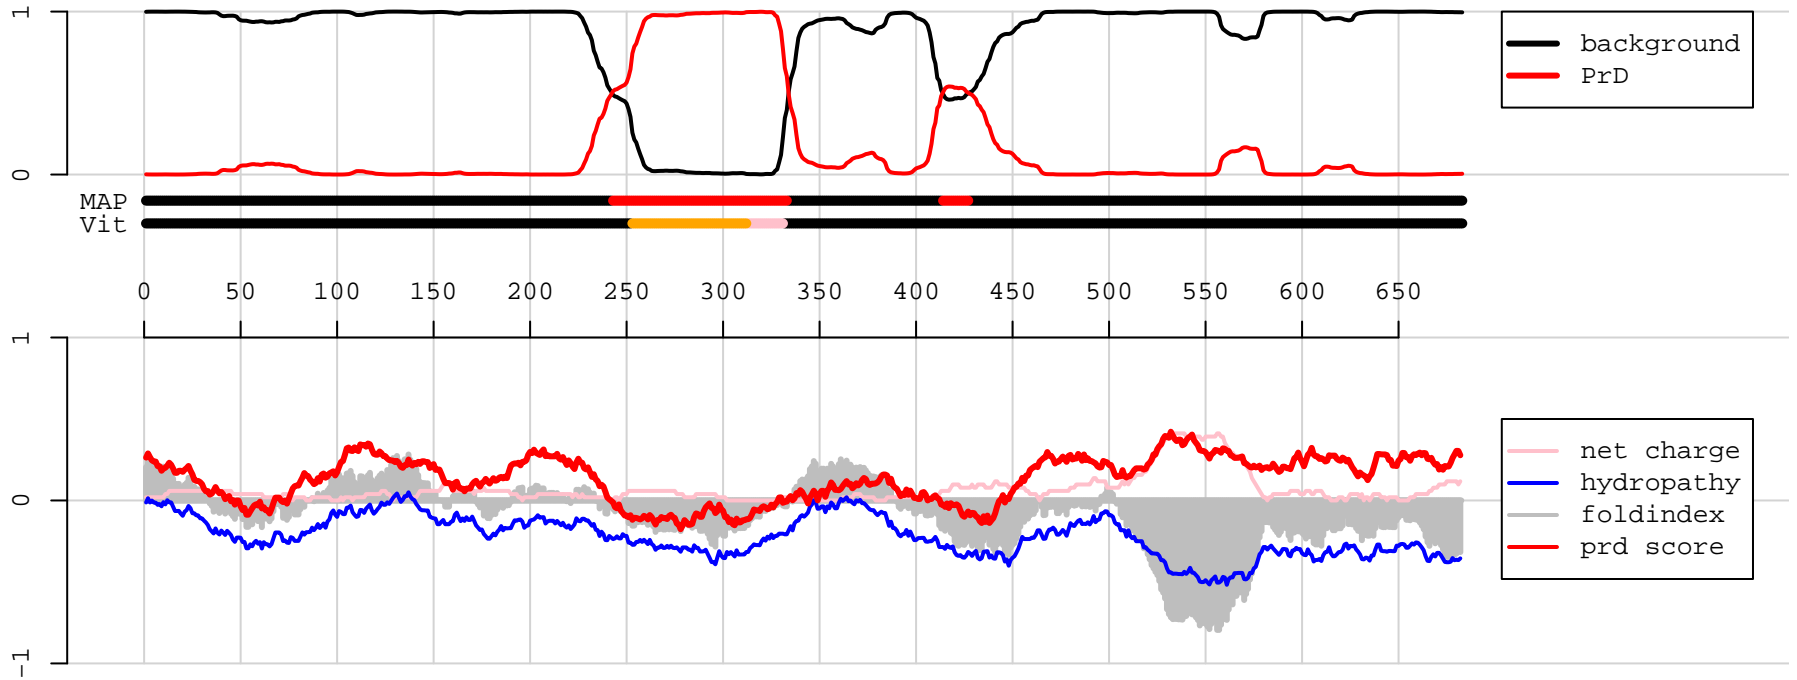

1 MDFTTMTMASNMATSTTTTATSAHASINSSSNFNIDIDSNQNTPSILINNNSDSSNGKNTDFNGVNNIHQKNIMNNTNNVHLYSPNIMDQTLTLPQDIAK  
 101 LRRESIAHSQGMGGVSWGSI SVGSWLRDEIISRNSIVPASANGAASAAAATTTATNTLQIQPTKRPSVSNPPYHRGYSISPQIAYTAYLPNLEKQYC  
 201 KDYSCCGLSLPGLHDLRHYEEAHI STSPNTTMSQIPMNSAGNTSSSVRMTNNTSSANYNLQNNMAANTKNAGHKTTNTMOAHSNATNNTSINNMHANL  
 301 QSNMDSNSTIROSOHPHHOONLLOOQLOSNVNHSTGAVPTPSVMGSATASSTTANPNVISITGAPNSGLSMANHSQQLHLNGLVDAVSTNDVFLRTSN  
 401 SPSRHVPHNKQINSNNNSGININNNTSHNSNINMGSKNAMVNRPHTFNNYSLNKTSRNP IQHQRKIDPHQTDLSPLVLVQDIDL SFMDDDILGPSNHNS  
 501 MNSVVNPTTGSHNYNTFHSSVHAKSSQNMVEDQIDDDIDDDDDVDDDDDDDDDDTENGSSNGKSVHNNNYKMPQOAYIDDPARRLYVMDHEEQKPFKC  
 601 PVIGCEKTYKNQNGLKYHRLHGHQNKLHENPDGTF SVIDPDSTDSFGDGMGSAKDKPYRCEVCGKRYKNLNGLYHRGHSTH

# VPS27

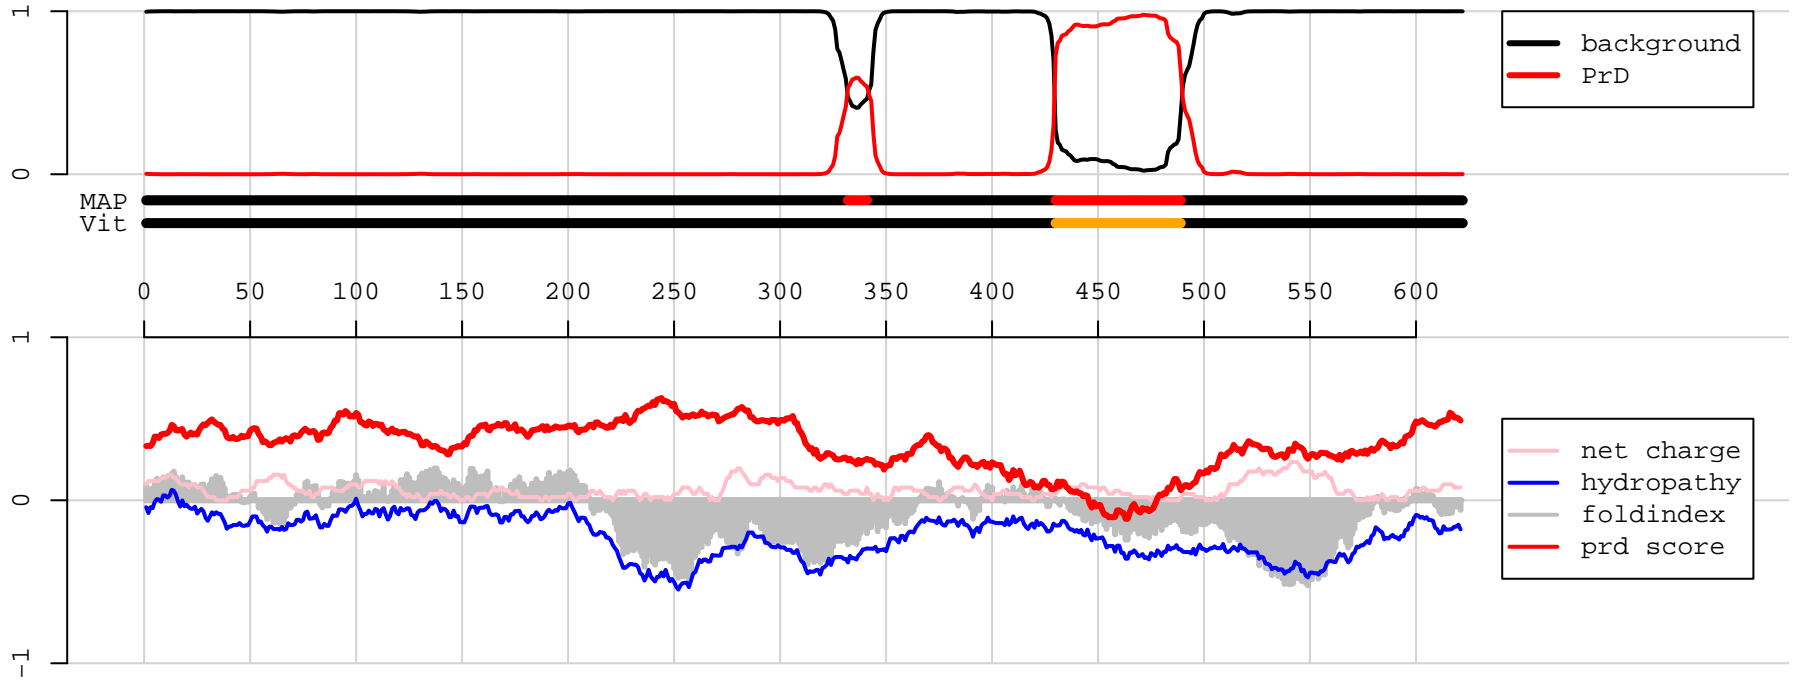

```

1  MSVSTPSELDALIEQATSESI PNGDLDLPIALEISDVLRSRRVNPKDSMRCIKKRILNTADNPNTQLSSWKLTNICVKNGGTPFIKEIC SREFMDTMEHV
101 ILREDSNEELSELVKTIYELYVAFKNSQLNYVAKVYDKLISRGIKFPEKLTLSNSPTAMFDSKTPADWIDSDACMICSKKFLLNRKHHCRSCGGVFC
201 QEHSNSIPLPDLGIYEPVRVCDSCFEDYDLKRHDDSKKSKKHRHRKRRKDRDYSTPEDEEELIRKAI ELSLKESRNSASSEPIVPVVESKNEVKRQEIEE
301 EEDPDLKAAIQESLREAAEAKLRSEROKASROMQPOPSPOPOPIHSVDLSDEEKDSIYMFASLVEKMKSRPLNEILED SKLQNLAQRFASKARLNYAL
401 NDKAQKYNTLIEMNGKISEIMNIYDRLLEQQLQSINLSOOYTLPOVPSDPYNYLTENVONPAESYOTPPLOQLSSHQYKPOODVSRQOSVKANS SPTTNI
501 DHLKTIDVTPHAQOKPOSHVELAPSDPPYPKEEADEGTAQVQDEESSTQESRERYPYPVETENGETSINKRPOGITRYDFPTVPARKFVQPESTVPLPAS
601 SSEIPIKEERPPSPQEELLIEL
  
```

# SEC16

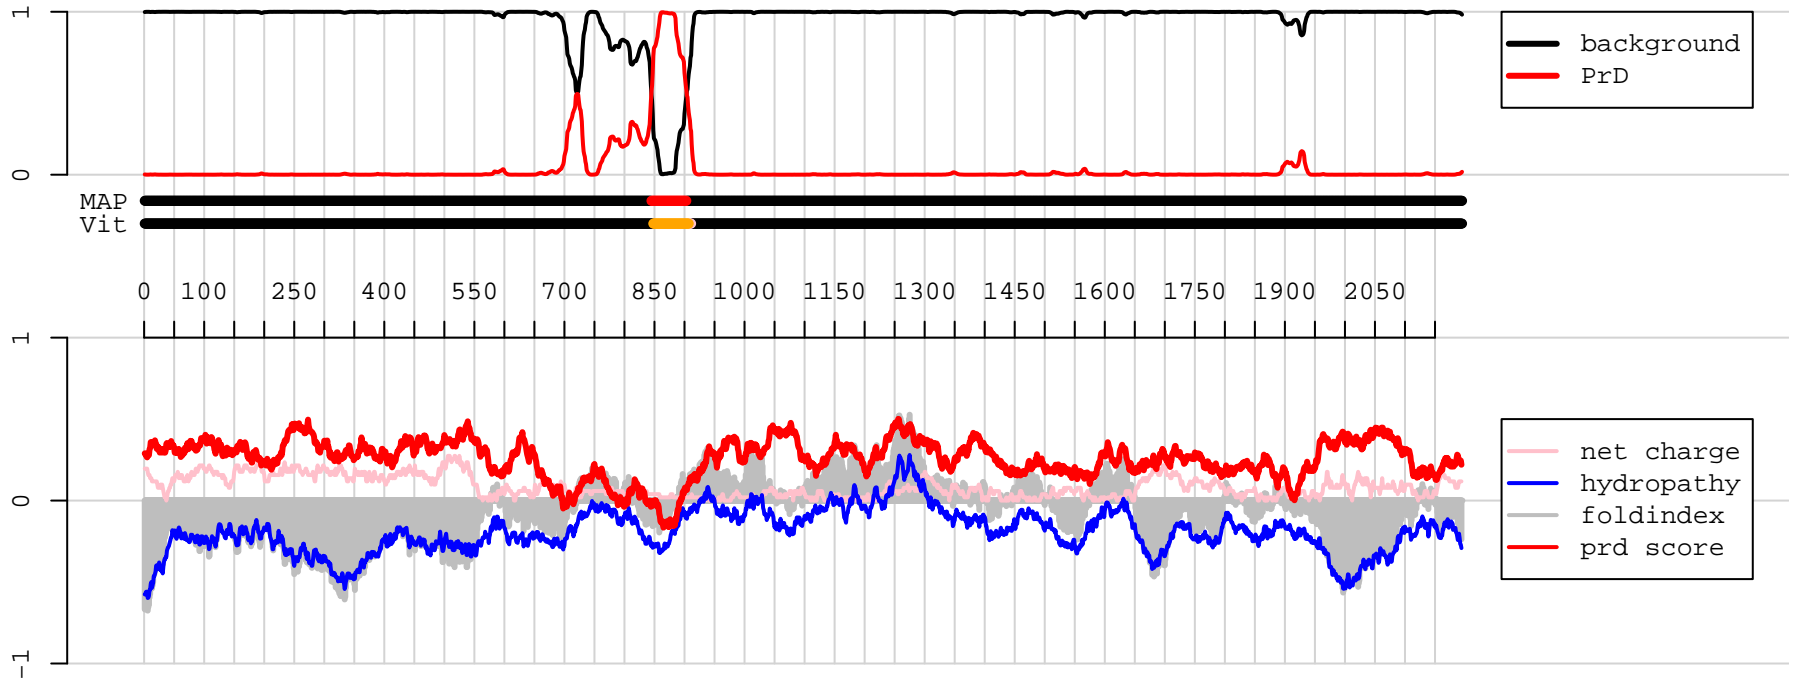

```

1  MTPEAKKRKNQKKLQKQKAAEKAASHSEEPLELPESTINSSFNDDSVNRTESDIASKSDVPPVSSSTNISPANETQLEIPDTQELHHKLLNDSQHD
101 ITADSNLDPNSIVEHDSVITOTKPAMSQEYEETA AHLSSRNPSLDVVAGELHNNNEHTQKIAVSAVEEDSFNEEEGENHDSIIISLNDATPSQYNHFL
201 PSDGNLLSPELSSGDTPTHNVPLGTKDNEINDDEYCNDKEISLNANNVLPDELSKEEDERLKLLETHVSTEEKQDIADQETAENLFTSSTEPSENKIRNS
301 GDDTSMLFQDDESQKVPWEEDVKKDFHNENTNNTQESAPNTDDRDKGYEGNEALKKSECTAADERSYSEETSEDI FHGHDKOVVEGQNDFTGKNIENE
401 SQKLMGEGNHKLPLSAEADIEPGKDIQDQAEDLFTQSSGDLGEVLPWESTDKNADVTSKSQEKHEDLFAASGNDEKLPWEVSDGEVSSGKTENSMOTST
501 EKIAEQKFSFLENDDLLDDDDSFLASSEEDTVPNTDNTTNLTSKPVEEKKASRYKPIIEEEAGMRQEQVHFTNTTGI VTPQQFHGLTKTGLGTPNQOV
601 SVPNIVSPKPPVVKDNRSNFKINEEKKKSDAYDFLEIIESSKKGHAKPVAVPTQRFSGNSFSSLDKPIQSRKGSNNSNRPPVIPLGTQEPRSSRTN
701 SAISQSPVNYAFPNPKIQQLQQAPIQSGMPLPNTNIPPPALKVETTVSAPPIRARGVSNASVGSSASFGARHATQYGLNNGVPPVSPYGOATINLPTAN
801 KYAPVSPTVQKQYPSVVQNLGASAVNTPNFVKTHRGTSSISSYTPNONEHASRYAPNYOOSYOVPYTSOPVGPVAGNSSYQSOTRSSYAVPMPQAQT
901 SASIQPHANIQPPTGILPLAPLRPLDPLQAATNLQPRASNITAANSLPLANLPLAENILPEIITHRATSSVAPPRQENNPIKIDNEALLRRQFPIFHWSA
1001 ANKVYAVPPIPDQSQYMISSIVQEIKVTPIDQIIKPNMMLKSFPGPLGSAKLKKKDLTKWMETTIKSISENESSTDMTIWQLLEMKLNDKVNWNKISK
1101 LLYNSDELLMYLSQFPNGDMIPNAYRLDINCQMRVLAFLQTGNHDEALRLALSKRDYAIALLVGLSMGKDRWSEVIQKYLYEGFTAGPNDQKELAHFLL
1201 LIFQVFGVNSKMAIKSFYTNNETSQWASENWSIVA AVLINIPENNEDPLLIPPVVLEFLIEFGIFLTKKGLTAAASTLFIIGNVPLSNEPVMADSDVIF
1301 ESIGNMNTFESILWDEIYEYIFSYDPKFKGFSSILPQKIYHASLLQEQGLNSLGTKYTDYLSSSVRKLPKKDILTINLTRELSEVASRLSESNTGWLAKP

```



# SIS1

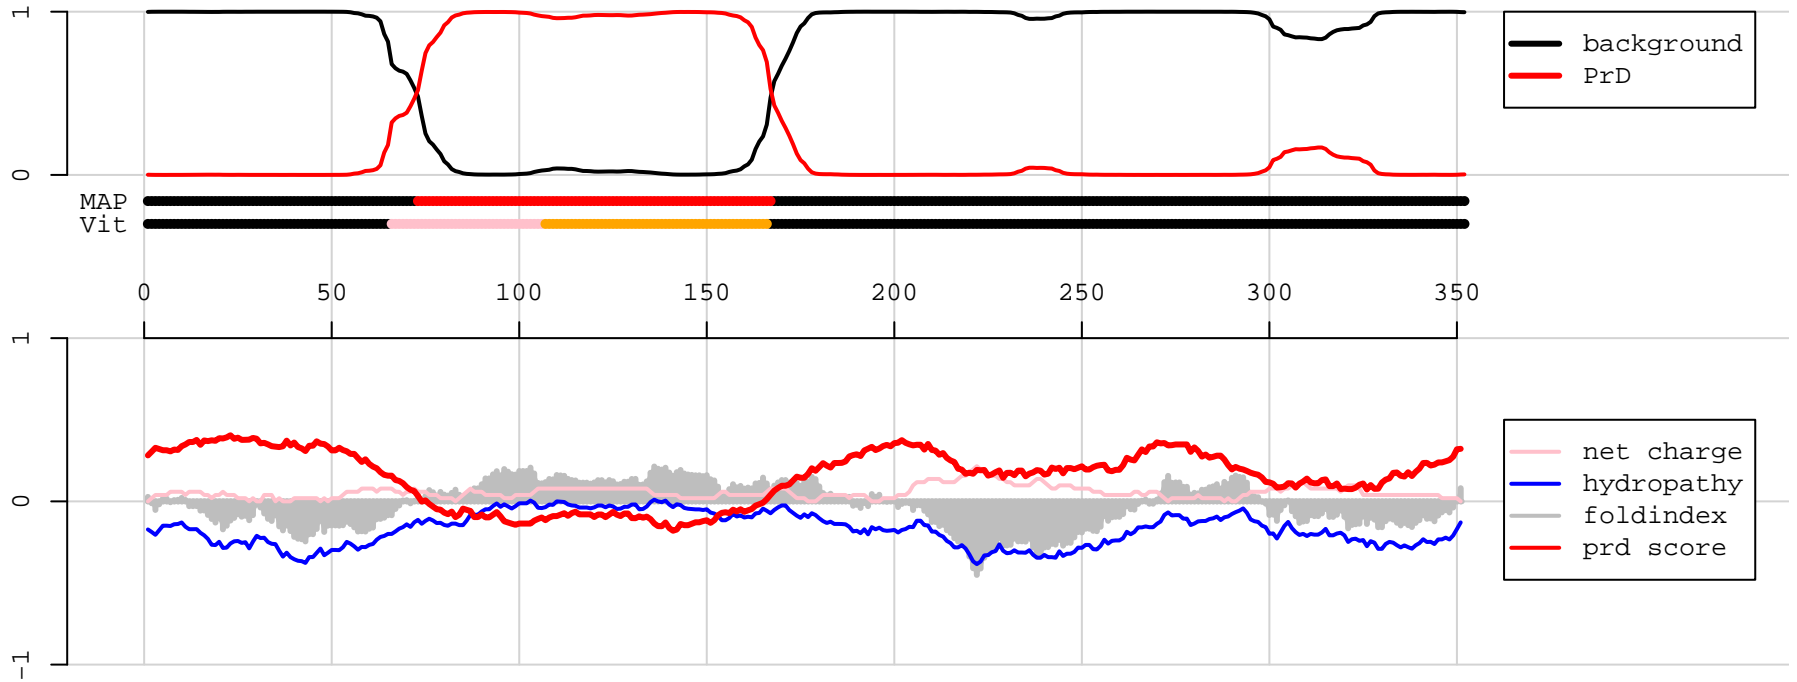

1 MVKETKLYDLLGVSPSANEQELKKGYRKAALKYHPDKPTGDTEKFKEISEAFEILNDPQKREIYDOYGLEAARSGGPSFGGPGGGGAGGAGGFPGGAGGF  
 101 SGGHAFSNEDAFNIFSQFFGGSSPFGGADDSGFSFSSYPSGGGAGMGGMPGGMGGMHGGMGGMPPGGFRSASSSPTYPEEETVQVNLPVSLEDLFVGKKKS  
 201 FKIGRKGPHGASEKTQIDIQLKPGWKAGTKITYKNOGDYNPOTGRRKTLOFVIOEKSHPNFKRDGDDLIYTLPLSFKESLLGFSKTIQTIDGRTLPLSRV  
 301 QPVQSOTSTYPGOGMPTPKNPSQRGNLIVKYKVDYPISLNDAQKRAIDENF

# YDR170W-A

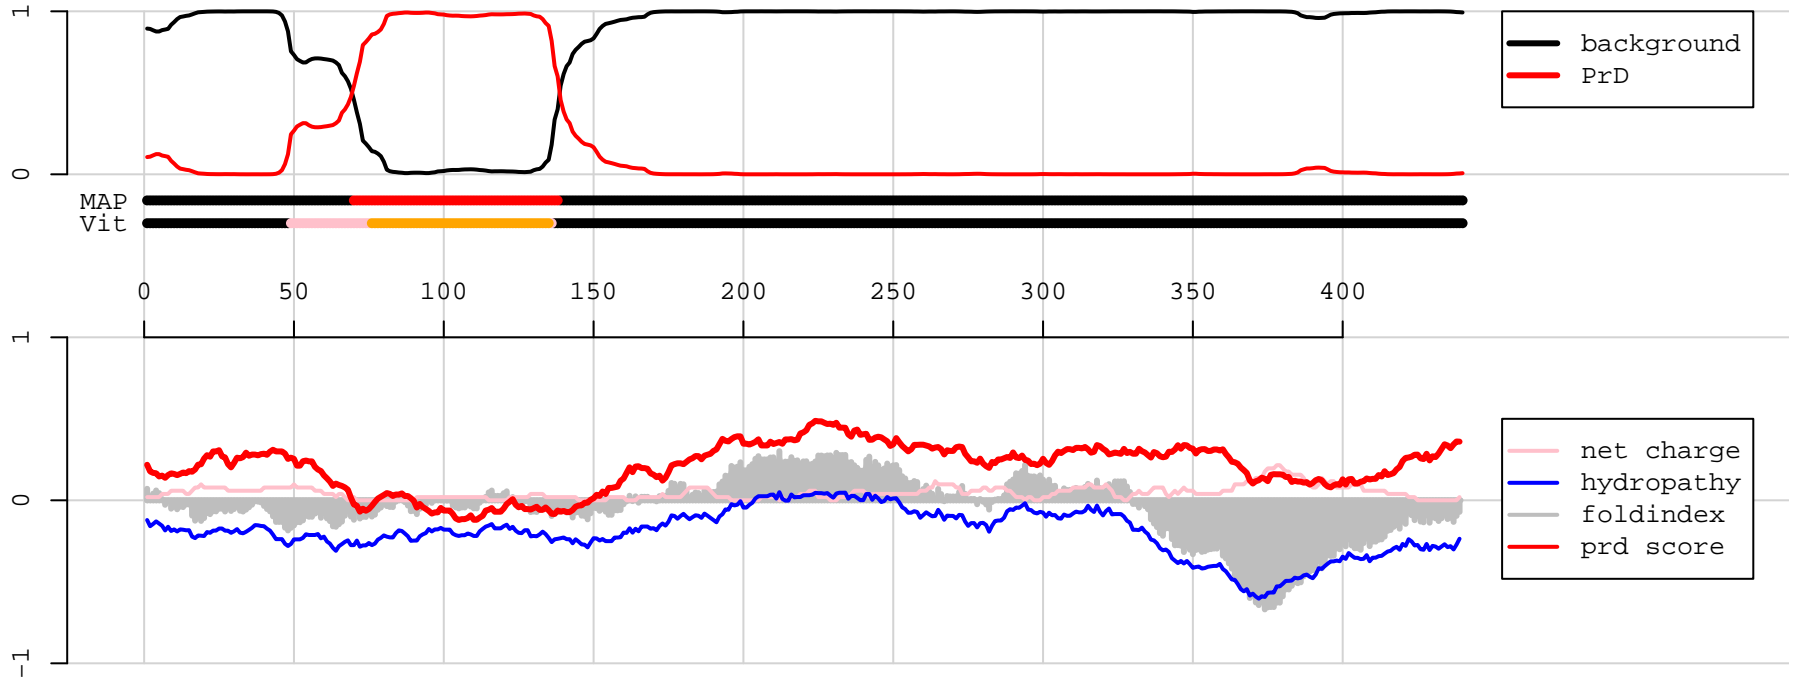

1 MESQQLSQHSPI SHGSACASVTSKEVQTTQDPLDISASKTEECEKVFTQANSOQPTTPPSAAVPENHHHASPOAAQVPLPONGPYPOQRMMPPOQANISG  
 101 WPVYGHPSLMPYPPYQMSPMYAPPGAOSQFTOYPOYVGTHLNTSPESGNSFPDSSSAKSNMTSTNQHVRPPPILTSPNDFLNWVKIYIKFLQNSNLGDI  
 201 IPTATRKAVRQMTDDELTFQLCHTFQLFALSQFLPTWVKDILSVDYTDIMKILSKSINKMQSDTQEVNDITTLANLHYNGSTPADAFEAEVTNILDRLKNN  
 301 GIPINNKVACQFIMRGLSGEYKFLRYARHRYIHMTVADLFSDIHSMYEEQESKRNKSTYRRSPSDEKKDSRTYTNTTKPKSITRNSQKPNNSQSR TARA  
 401 HNVSTSNNFPGPDNDLIRGSTTEPIQLKNKHDHLRPGTY

# RSC30

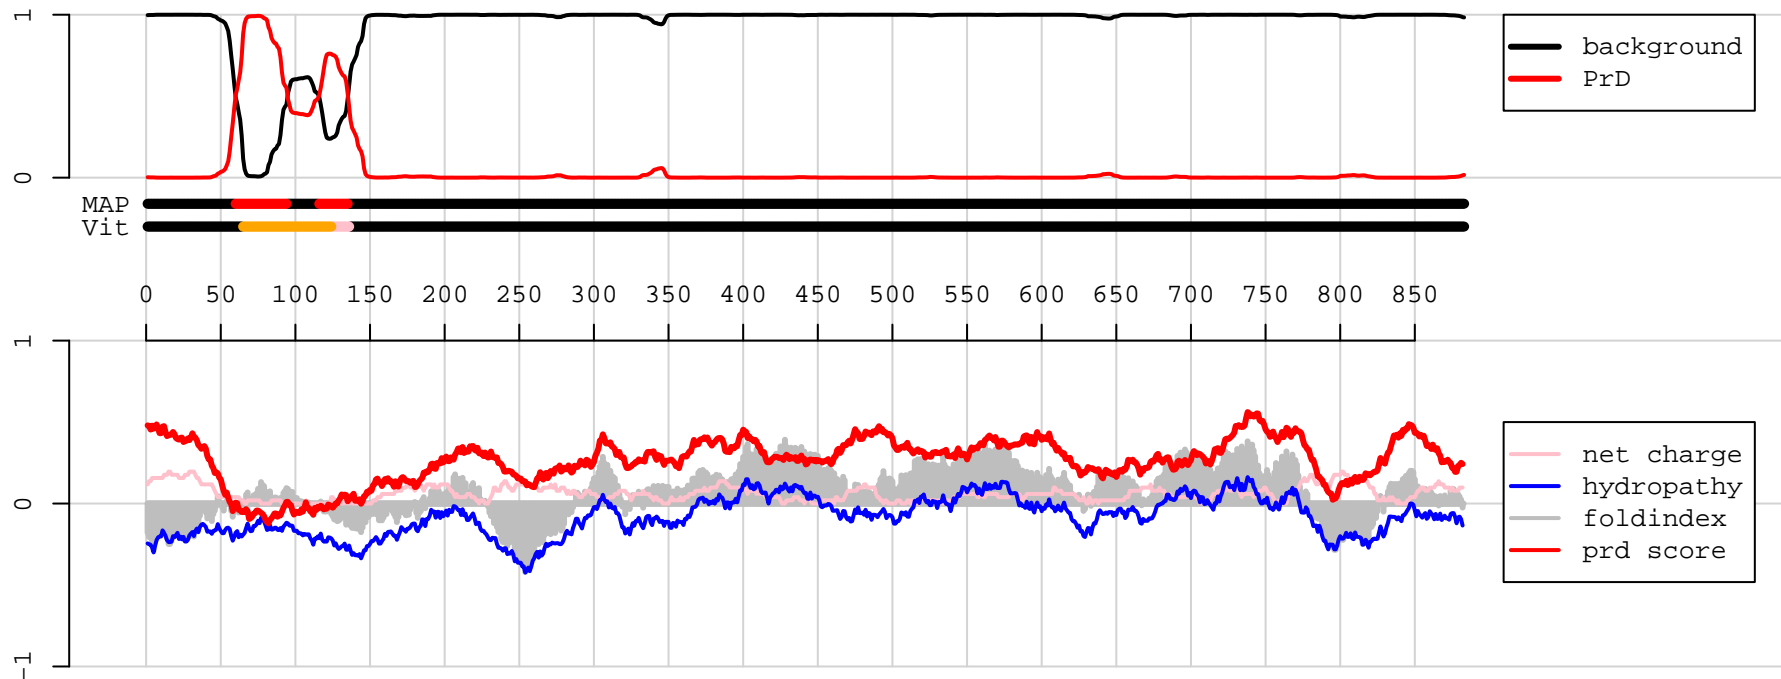

1 MMDMQVRKVRKPPACTQCRKRKIGCDRAKPICGNCVKYNKPCDFYDPGPGKMOVAVPSASGMSTHGNGOGSNHFSOGNGVNOKNVMIOTQYPIMQTSIEAF  
 101 NFSFNPSVDTAMOWTKAASYONNNNTNNNTAPRONSSSTVSSNVHGNTIVRS DSPDVP SMDQIREYNTRLQLVNAQSFDYTDNPYSFNVGINQDSAVFDLMT  
 201 SPFTQEEVLIKEIDFLKNKLLDLQSLQLKSLKEKSNLNADNTTANKINKTGENSEKKGKVDGKRAGFDHQTSTRTSOSSQKYFTALTITDVQSLVQVKPLKD  
 301 TPNYLFTKNFIIFRDHYLFKFNILHDI CHINQFKVSPNNKNHQYMEVCKVNFPPKAI I IETLNSESLNNLNIEEFLPIFDKTLLEFVHNSFPNGDT  
 401 CPSFSTVDLPLSQLTKLGELTVLLLLLND SMTL FNKQAINNHVSALMNNLRLIR SQITLINLEYDQETIKFIAITKFYESLYMHDDHKSSLEDL SCLL  
 501 SFQIKDFKLFHFLKKMYYSRHSLLGQSSFMVPA AENLSP I PASIDTNDIPLIANDLKLLETQAKLINILQGVPPFYL PVNLTKIESLLETLTMGVSNTVDL  
 601 YFHDNEVRKEWKDTLNFINTIVYTNFFLFVQNESSLMAVQHSSNNKTSNSERCAKDLMKI I ISNMHIFYSITFNFIFPIKSIKSFSSGNRHFHNSNGKEF  
 701 LFANHFIEILQNFIAITFAIFQRCEVILYDEFYKNLSNEEINVQLLLIHDKILEILKKIEIIVSFLRDEMNSNGSFKSIKGFNKVLNLIKYMLRFSKKKQ  
 801 NFARNSDNNNVTDYSQSAKNKNVLLKFPVSELNRIYLKFKKEISDFLMEREVVQRSIIIDKDLESNGLGITTANFNDFYDAFYN

# MDJ1

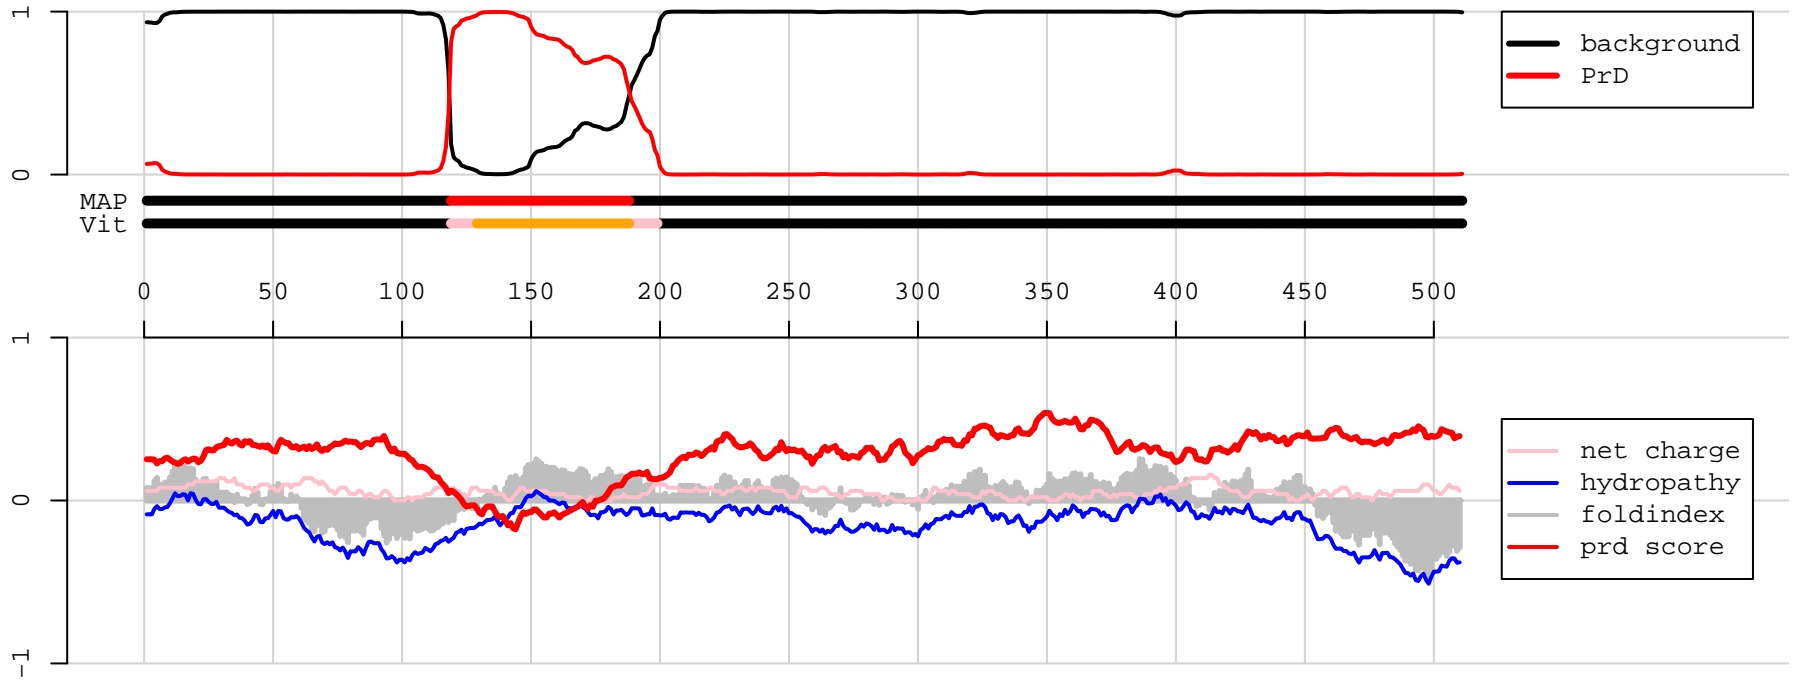

```

1  MAFQQGVLSRCSGVFRHHVGHSRHINNILYRHAIAFASIAPIRIPKSSFHTSAIRNNEAFKDPYDTLGLKKSATGAEIKKAYYKLAKKYHPDINKEPDAEK
101 KFHDLQAYEILSDETKRQOYDOFGPAAFGGGGAAGGAGGGSGSPFGSQFHDFSGFTSAGGSPFGGINFEDLFGAAFGGGGRGSGGASRSSSMFRQYRGD
201 PIEIVHKVSFKDAVFGSKNVQLRFSALDPCSTCSGTGMKPNTHKVSCSTCHGTGTTVHIRGGFQMMSTCPTCNGEGTMKRPQDNCTKCHGEGVQVNRKT
301 ITVDLPHGLQDGDVVRIPGQGSYPDIAVEADLKDSVKLSRGDILVRIKDPNFSIKNKYDIWYDKEIPITTAALGGTVTIPTVEGQKIRIKVAPGTQY
401 NQVISIPNMGVPKTSTIRGDMKVQYKIVVKKPQSLAEKCLWEALADVTNDDMAKKTMOGTAAGTAINEEILKKQKQEEKHAKKDDNTLKRLENFITN
501 TFRKIKGDKKN
  
```

# HMS1

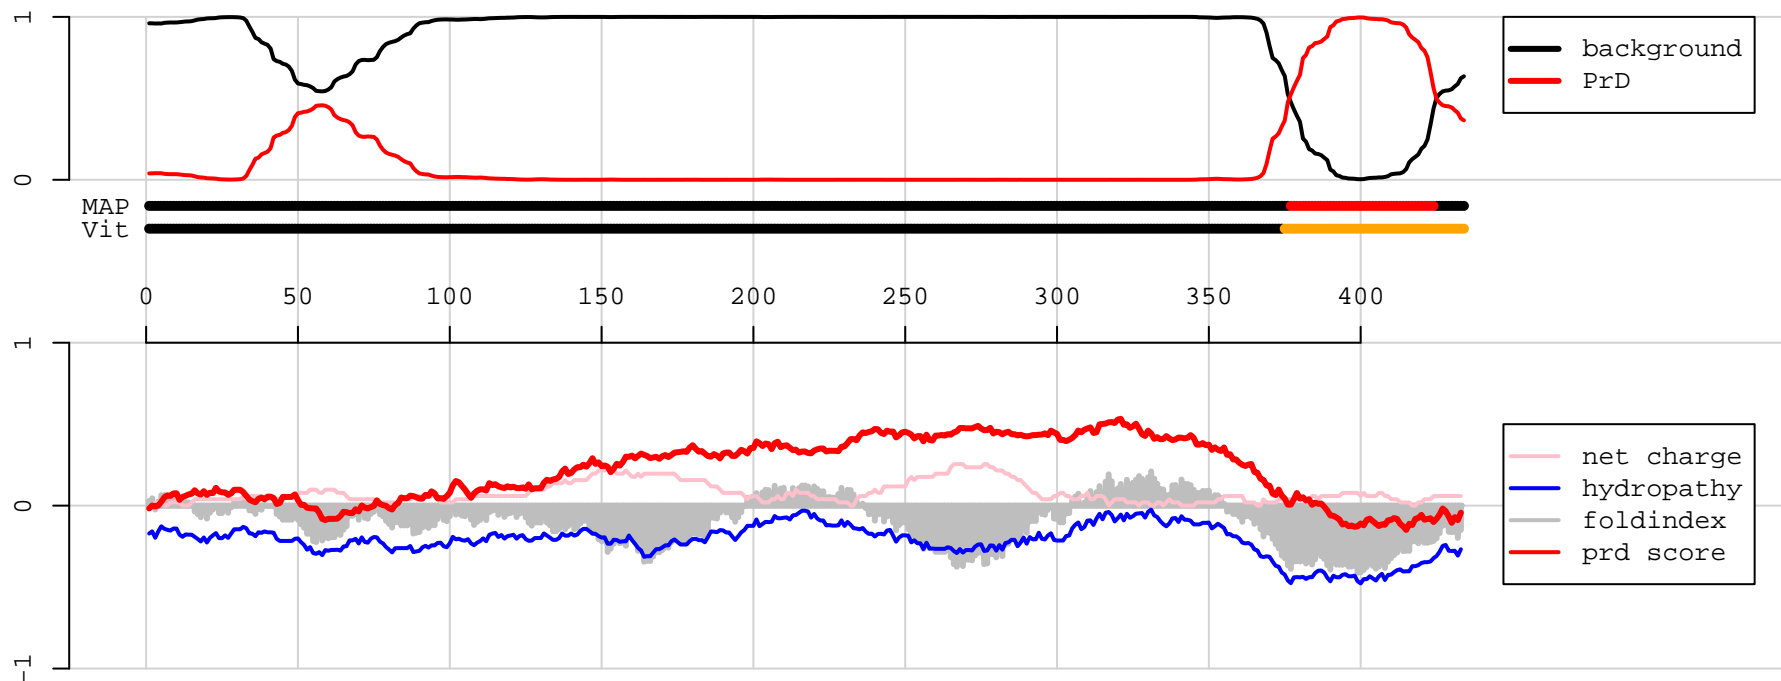

1 MPNFQKPFSGSSDGNSVMNDLGNKVAIKVFDCRSAQDGSEEQNVNVTTNQMYLMFQSNNYNVPPPNYNTEDLGSOGPPTHAYYAPFQHPHILQPPVPPVY  
 101 KNNTYSATDOYSDSSFPNTSGHTPVIDSNYNDALASIPTTTTGSTMTTDNGNTIDSEEYIDNMEVFSSEENENIDNVKQTDLKSEKSSLLSAASIVK  
 201 KEQLSGFENFLPLSKTESPLVTADEIKSSLNLENIDNADSMSFKLKTSPIRKHFHVKPKRITRVRTGRVSHNIEKKYRSNINDKIEQLRRTVPTLRVAY  
 301 KKCNDLPITSRDLADLDGLEPATKLNKASILTKSIEYICHLERKCLQLSLANQHLSNDTRDSFVHLTEPSQPLSDNSSSEOVOKOTRSCOROROROPROO  
 401 OPLHNIQYNIIPHONGLMSGTNNSHDMDFNNAGDF

# RVS167

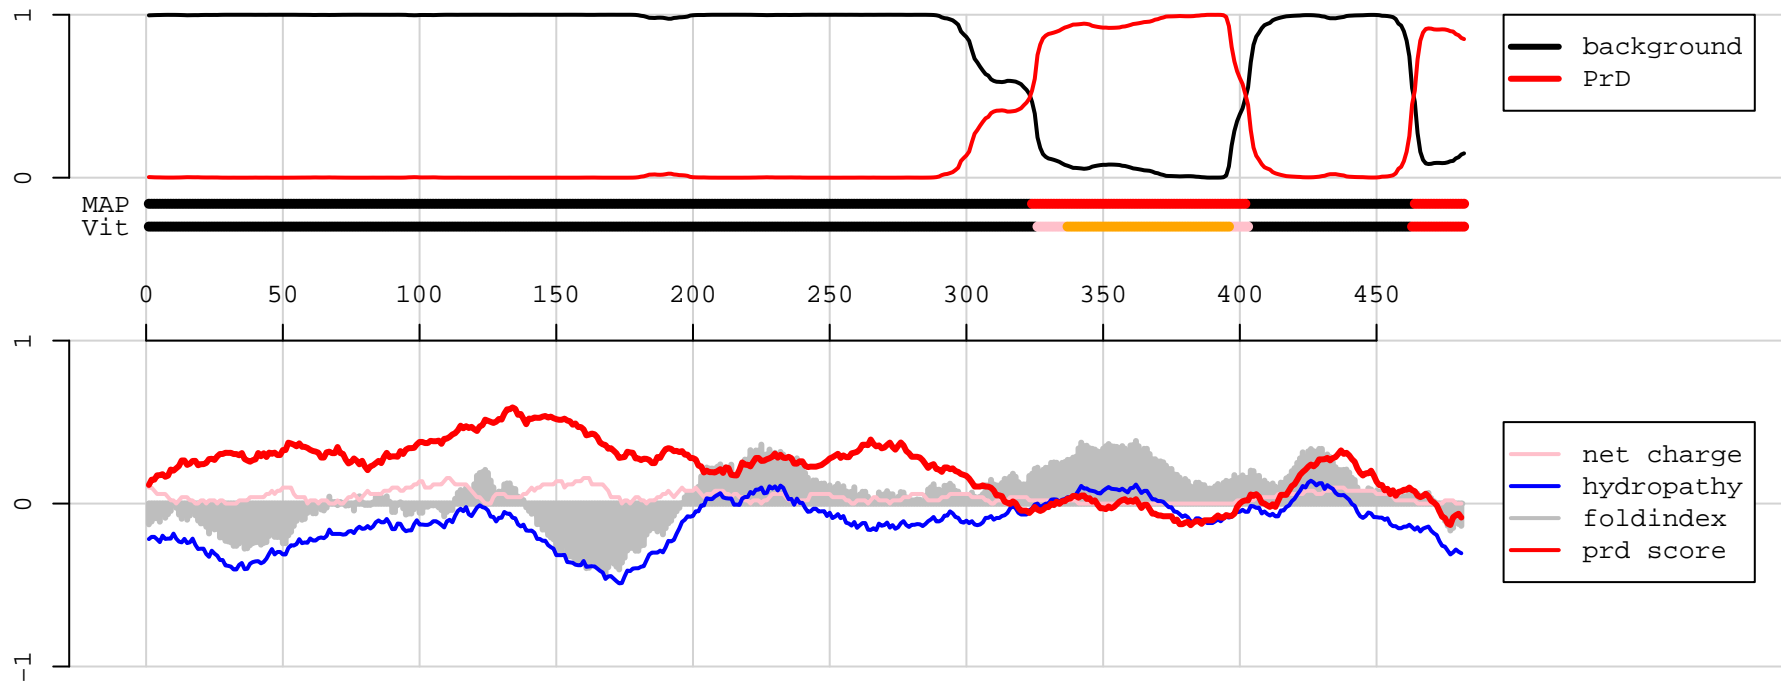

1 MSFKGFTKAVSRAPQSFROKFKMGEQTEDPVYEDAERRFOELEQETKKLSEESKRYSTAVNGMLTHQIGFAKSMEEIFKPI SGKMSDPNATIPEDNPQGI  
 101 EASEQYRAIVAE LQETLKPDLALVEEKIVTPCQELLKIITYIRKMATKRNHKKLDLDRHLNTY NKHEKKKEPTAKDEERLYKAQAQVEVAQQEYDYNDL  
 201 LKTQLPILFSLEAEFVKPLFVSFYFMQLNIFYTLYNRLQDMKIPYFDLNSDIVESYIAKKNVVEEQTDALTITHFKLGYSKAKLEMTRRKYGVATAEGSP  
 301 VSGASSGVGYGAGYDPATATSPTPTGYGYGAAAPSYAAQPAAQYGTAAAVGTAAAVGTAAGAAAGAVPGTYPOYAAAOSPPLTGLGFQOSPQQOOGPPPA  
 401 YSNPLTSPVAGTFAAAVAAAAPGVETVTALYDYQAQAAGDLSFPAGAVIEIVQRTPDVNEWWTGRYNGQQGVFPGNYVOLNKN

### SVL3

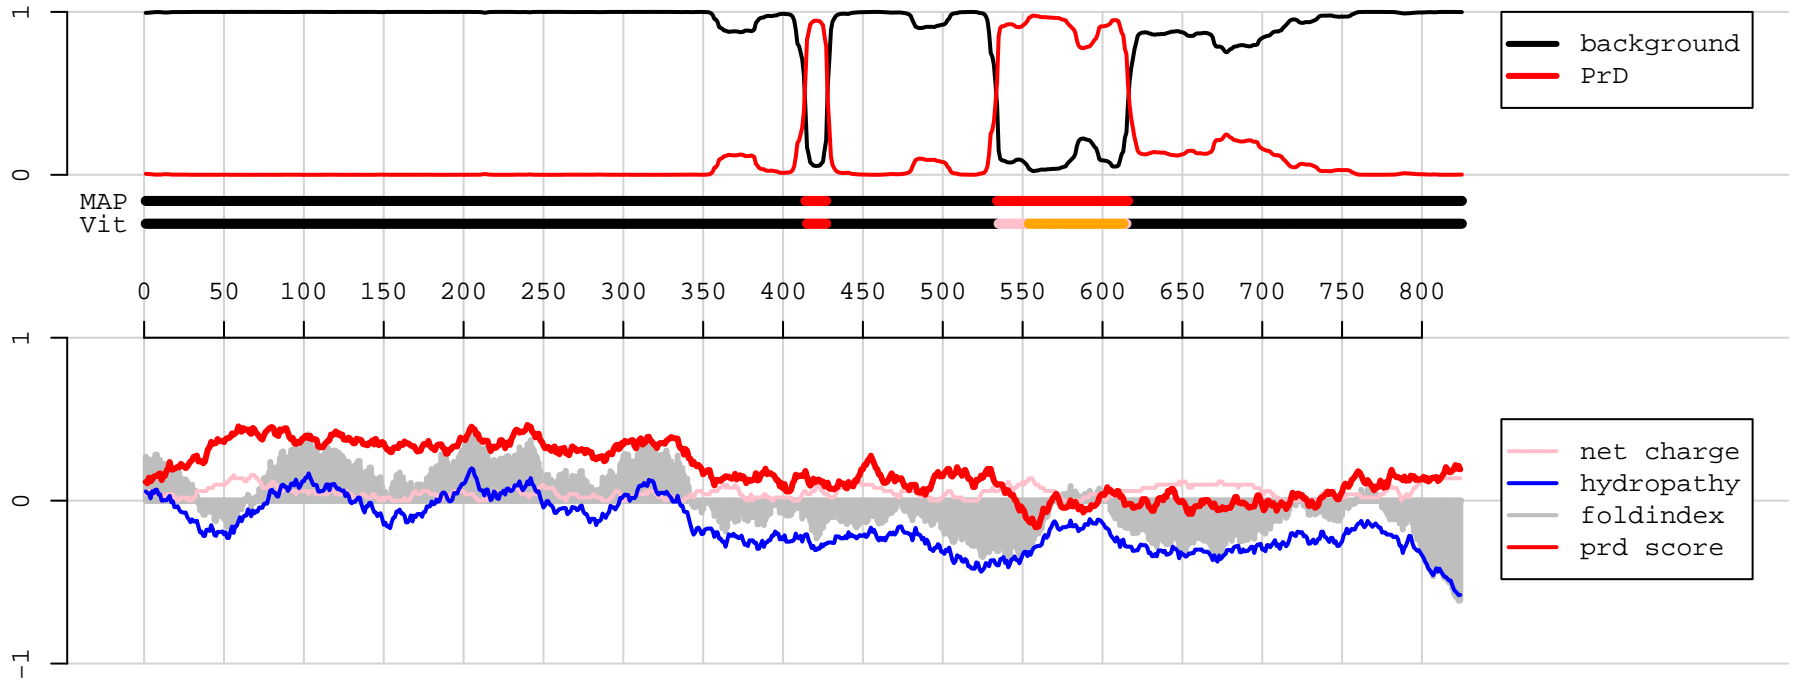

```

1  MSSSSLRVLAIGNPNILFYTSRFQLAKNIDLHVNDKSKSCQFEIETEYYGKDRFELENHFTSIEHLTEALSSKSSEAVFDIIIMSAPSLQELSSLASKL
101  TSIIDSNTKIFLESSGFIQLEPFVKLSMESPHVNVFSILTDLDIRQIGPNHFKHFPSTAKENTIIYLGESKSSTEKYSSGVITLLTTFEKLFKLFNSNIKI
201  NLCNFSSIEFLSQWKLAISRICFDPLLIMFEQENPSDLLDQIIAKPLISGLVTEIITVAKTMGARLNSSHDNENSLLSLWKNSYHSTNKPPALVYHFH
301  QTTPLNIDILLQTILLADDFGIKTPYLEFLYSVLSQFERLNSGKSKWFIRSDEKTOILOSLQKSOKNESALOTOITSLOGOISKLRQELLMQAKOHEME
401  TNELKEKHOVALKAQAQAQAQAQSOAOTSIEALTPTEATNQSDTNEYKATGTPNLRDIEDMALYSVNYGDSPPVRSPPPVVSSQPOMNSPLSSHSTQTFGEN
501  NGTNDKLLQERELQLRKKELQERELEFQKRALQORFNNSNNSIPRKPSFPLOOSANVRSNSRGMHGTNGAMSOPASAGNFVDPISSSIAAYDPQQP
601  PSLPLOOPPOOSVOVPFHSHSIKPTSRKNRNSNMPNIGNPSSINMSDFGRPPNNSOTRLNSMPTHSIIVNONRLRSOOSKNKLNMPHATNPNNTFNOVPA
701  PSLNNHVPTOROFSSSTMIIEVTNNNNKVNNSSSNPDI STNSVVHNAHQFTNTNNNTSSTVDINDPKNIAPPPTTSVSAPSTPTLSSSSQMANMASPSTDN
801  GDNEEKNGGKKKRFGLFKKKNKSKK

```

# SGT2

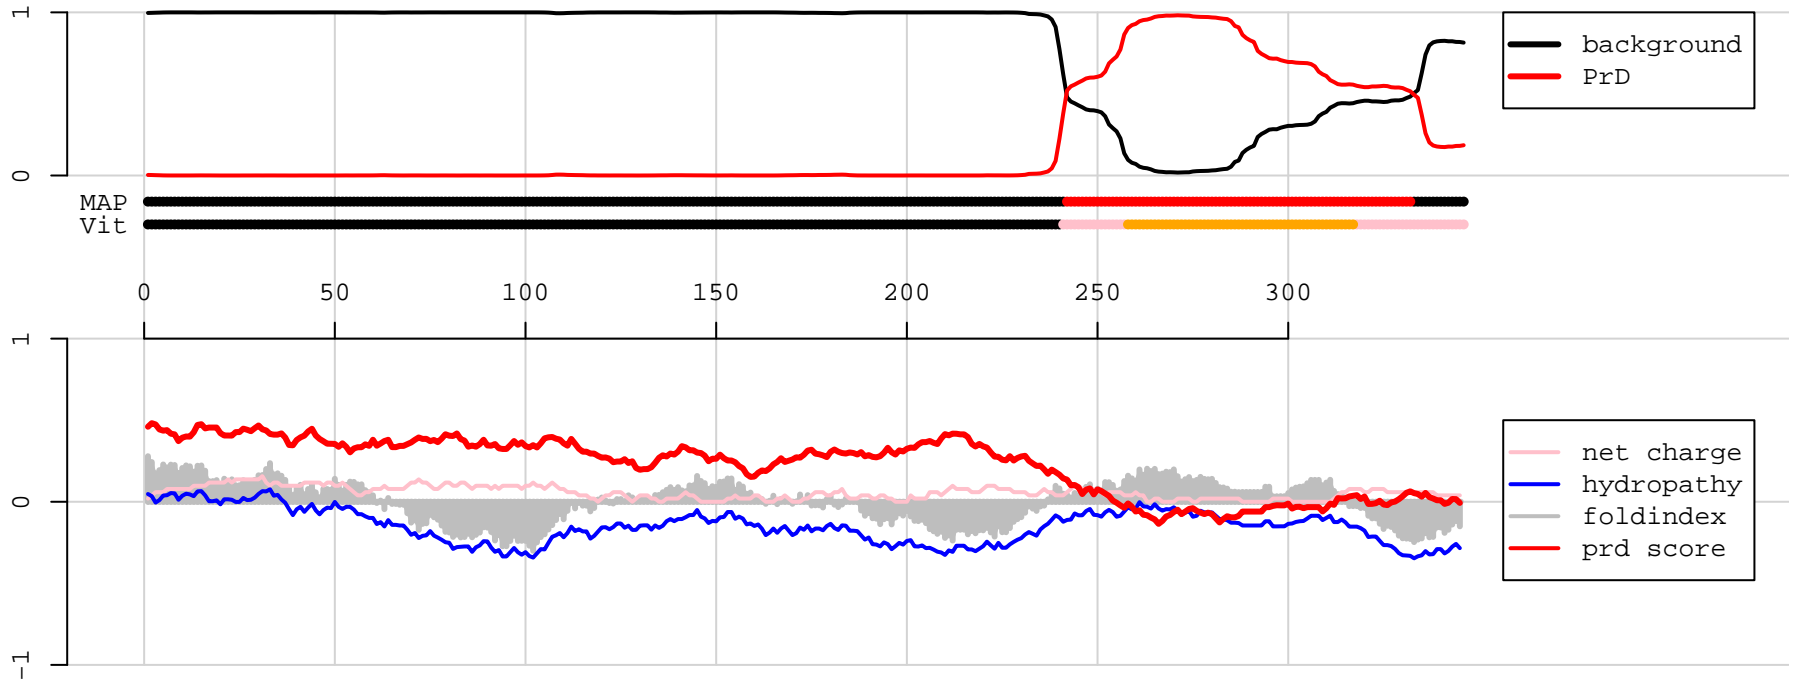

1 MSASKEEIAALIVNYFSSIVEKKEISEDGADSLNVAMDCISEAFGFEREAVSGILGKSEFKGQHLADILNSASRVPE SNKKDDAENVEINIPEDDAETKA  
 101 KAEDLMQGNKAMANKDYELAINKYTEAIKVLPTNAIYYANRAAAHSSLKEYDQAVKDAESAISIDPSYFRGYSRLGFAKYAQGKPEEAL EAYKKVLDIE  
 201 GDNATEAMKRDYESAKKKVEQSLNLEKTVPEQSRDADVDA SQGASAGGLPDLGSLLGGGGLGGLMNNPOLMQAAOKMMSNPGAMONIOKMMODPSIROMAE  
 301 GFASGGGTPNLSSDLMNNPALRNMAGNLFGGAGAOSTDETPDNENKO



# DED1

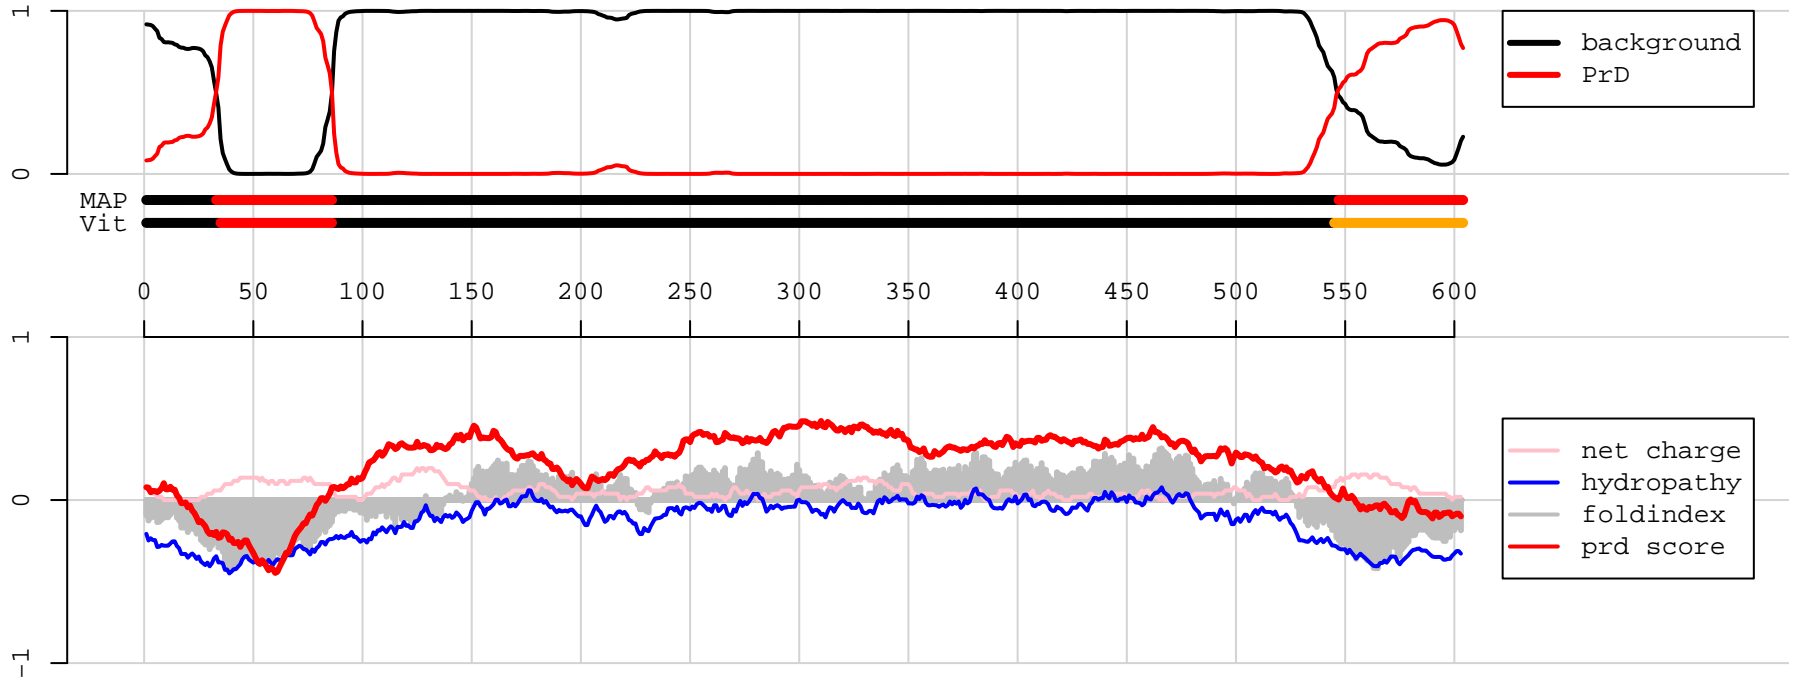

1 MAELSEQVQNLSINDNNENGYVPPHLRGKPRSAR**NNS**SNYN**NNNGGYNGGRGGGSFFS**SNNRRGGYGNGGFFGGNNGGSRSNGRS**SGGR**WIDGKHVPAPRNE  
 101 KAEIAIFGVPEDPNFQSSGINFDNYDDIPVDASGKDVPEPITEFTSPPLDGLLENIKLARFTKPTPVQKYSVPIVANGRDLMACAQTGSGKTGGFLFPV  
 201 LSESFKTGSPQPESQGSFYQRKAYPTAVIMAPTRELATQIFDEAKKFTYRSWVKACVVYGGSPIGNQLREIERGCDLLVATPGRLNDLLERGKISLANV  
 301 KYLVLDEADRMLDMGFEPQIRHIVEDCDMTPVGERQTLMFSAFPADIQHLARDFLSDYIFLSVGRVGTSENITQKVLYVENQDKKSALLDLLSASTDG  
 401 LTLIFVETKRMADQLTDFLIMQNFRATAIHGDRTQSERERALAAFRSGAATLLVATAVAARGLDIPNVTHVINYDLPSDVDDYVHRIGRTGRAGNTGLAT  
 501 AFFNSENSNIVKGLHEILTEANQEVPSFLKDAMMSAPGSRNSNR**GGFGRNNNRDYRKAGGASAGGWGSSRSRDNSFRGGSGWGS**SDSK**SSGWGNSGGSNN**  
 601 **SSWW**

# YMR002W

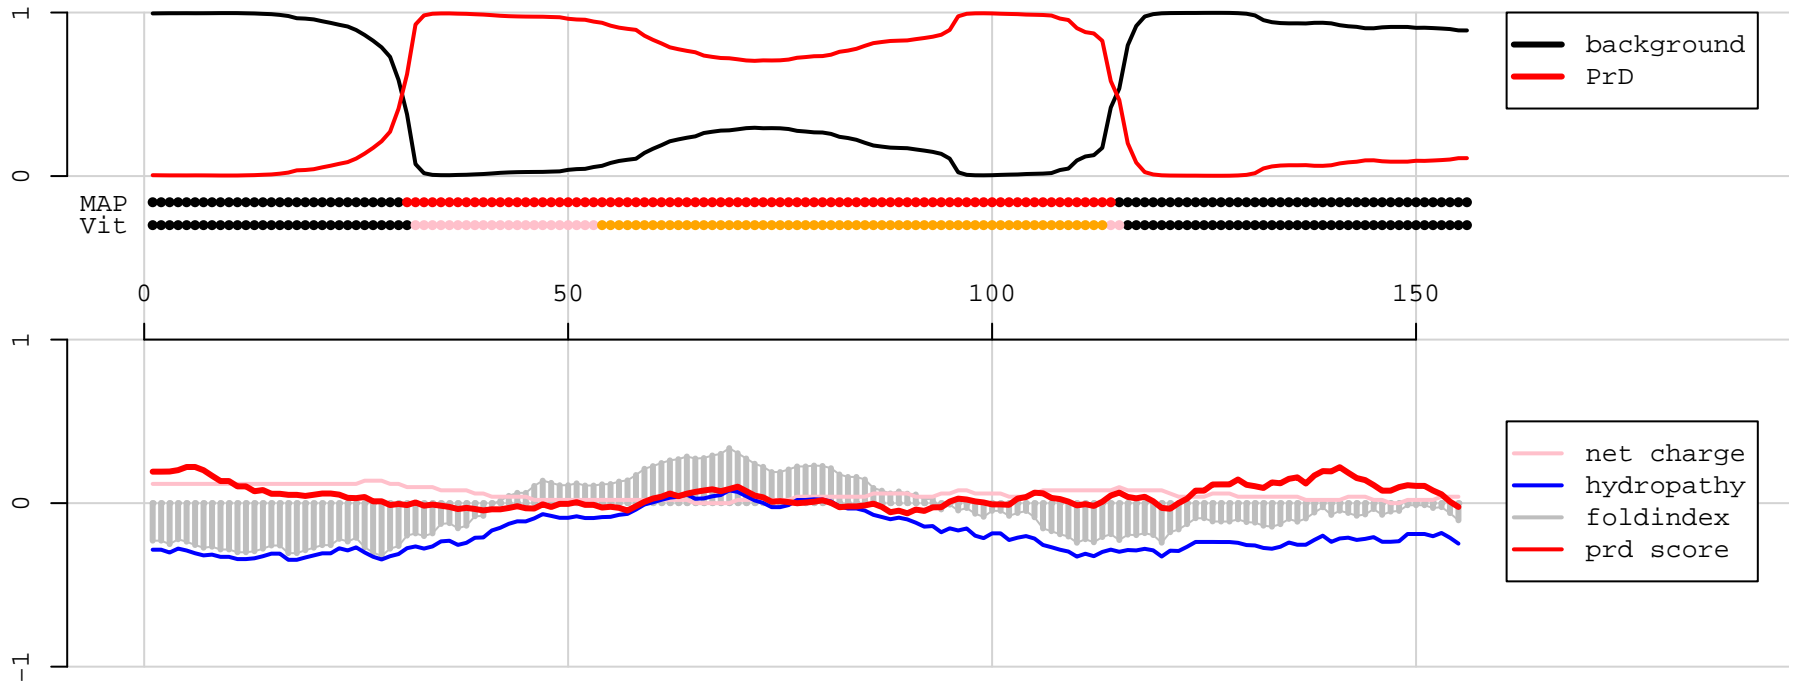

1 MARGSSRPISRSPRTQTRSASTMAAPVHPOOOOPNAYSHPPAAGAOTROPGMFAQMASTAAGVAVGSTIGHTLGAGITGMFSGSGSDSAPVEQQQN  
 101 MANTSGOTOTDQQLGRRTCEIDARNFTRCLDENNGNFQICDYLLQQLKACQEARQY
